# Supplementary material for: The Glycine max cv. Enrei Genome for Improvement of Japanese Soybean Cultivars
Source: Int J Genomics. 2015 Jun 23;2015:358127. doi: 10.1155/2015/358127 (PMC4493290; doi:10.1155/2015/358127)
Supplement: Supplementary file 1 — The supplementary materials provide details of reference mapping, genomic and phylogenetic analysis of Glycine max cv. Enrei such as the filtered set of single copy genes used for phylogenetic analysis based on OrthoMCL clustering (Table S1), a list of DNA markers derived from cv. Enrei used for reference mapping (Table S2), details of the genome sequence reads used for reference mapping and de novo assembly (Table S3), a list of markers with unmatched linkage order and physical position (Table S4), the BAC-end sequences (BES) mapped in the cv. Enrei genome assembly (Table S5), the sequencing and assembly of cDNA libraries derived from young leaves (Table S6), the SNPs and INDELs in G. max cv. Enrei based on Gmax275 genome assembly (Table S7), and the seed proteome data and corresponding models in Gmax275 and cv. Enrei (Table S8). [file 358127.f1.xlsx]

## Sheet: TableS1
Supplementary Table S1. A filtered set of single copy genes used for phylogenetic analysis
G. max cv. Enrei	Gmax275	A. lyrata	A. thaliana	O. sativa	M. truncatula
Gmech0010G03752	Glyma.10G240400.1	918223|PACid:16042081	AT5G51880.1	Os03t0119000-01	Medtr1g101840.1|PACid:23045905
Gmech0010G03367	Glyma.10G195900.1	317863|PACid:16057405	AT3G10620.1	Os04t0685800-01	Medtr1g090550.1|PACid:23044306
Gmech0017G00678	Glyma.17G075900.1	488173|PACid:16050482	AT5G13510.1	Os03t0284400-01	Medtr4g131540.1|PACid:23051912
Gmech0009G02400	Glyma.09G124600.1	894884|PACid:16060776	AT1G70670.1	Os06t0254700-01	AC233676_19.1|PACid:23053850
Gmech0004G01407	Glyma.04G123100.1	484970|PACid:16040808	AT3G45900.1	Os03t0853600-01	Medtr5g026680.1|PACid:23032897
Gmech0007G00627	Glyma.07G075100.1	914207|PACid:16045354	AT4G23890.1	Os07t0196200-01	Medtr8g032260.1|PACid:23038658
Gmech0015G03542	Glyma.15G238400.1	482887|PACid:16046124	AT2G38750.1	Os05t0382600-02	Medtr8g038170.1|PACid:23040107
Gmech0015G01121	Glyma.15G125100.1	484158|PACid:16053857	AT2G02400.1	Os01t0978400-01	Medtr2g028620.1|PACid:23018641
Gmech0013G01754	Glyma.13G101400.1	474402|PACid:16054419	AT1G52760.1	Os02t0207900-01	Medtr4g127220.1|PACid:23049891
Gmech0002G00715	Glyma.02G081200.1	488450|PACid:16061910	AT5G16010.1	Os07t0162100-00	Medtr6g043740.1|PACid:23026238
Gmech0002G00498	Glyma.02G057000.1	495016|PACid:16057064	AT5G49560.1	Os07t0569500-01	Medtr8g077610.1|PACid:23039706
Gmech0002G00967	Glyma.02G103500.1	912997|PACid:16046371	AT4G34050.1	Os06t0165800-01	Medtr4g085590.1|PACid:23051314
Gmech0002G00099	Glyma.02G009700.1	470202|PACid:16037968	AT1G02420.1	Os03t0208600-01	Medtr1g086500.1|PACid:23041737
Gmech0002G03713	Glyma.02G245800.1	475745|PACid:16038726	AT1G66430.1	Os06t0232200-00	Medtr5g079460.1|PACid:23030763
Gmech0002G00462	Glyma.02G052600.1	490994|PACid:16055842	AT4G36420.1	Os03t0734400-01	Medtr8g076780.1|PACid:23037104
Gmech0019G01927	Glyma.19G079000.1	340279|PACid:16042385	AT3G01660.1	Os04t0481300-01	Medtr7g032900.1|PACid:23022343
Gmech0019G02086	Glyma.19G084400.1	861820|PACid:16039529	AT5G14280.1	Os05t0302600-01	Medtr8g088170.1|PACid:23038862
Gmech0019G00523	Glyma.19G044200.1	916464|PACid:16051880	AT5G38630.1	Os08t0384000-01	AC233140_79.1|PACid:23053583
Gmech0003G02625	Glyma.03G128800.1	897197|PACid:16052298	AT3G10210.1	Os01t0948300-01	Medtr7g090050.1|PACid:23023079
Gmech0003G02539	Glyma.03G119400.1	494675|PACid:16040108	AT5G43280.1	Os01t0925200-01	Medtr3g085700.1|PACid:23014006
Gmech0020G03931	Glyma.20G244100.1	909305|PACid:16036840	AT5G13520.1	Os03t0819100-01	Medtr1g116230.1|PACid:23043181
Gmech0011G00629	Glyma.11G075600.1	496977|PACid:16044663	AT5G66290.1	Os03t0727100-01	Medtr5g021750.1|PACid:23034887
Gmech0011G00684	Glyma.11G082400.1	491070|PACid:16054827	AT4G35760.1	Os03t0131500-01	Medtr5g023180.1|PACid:23032537
Gmech0011G00148	Glyma.11G018300.1	474917|PACid:16054018	AT1G64350.1	Os01t0620100-01	Medtr6g072020.1|PACid:23027443
Gmech0011G00030	Glyma.11G003800.1	477902|PACid:16044993	AT3G06035.1	Os07t0645000-01	Medtr5g005710.1|PACid:23034235
Gmech0014G03697	Glyma.14G193000.1	496002|PACid:16054459	AT5G58770.1	Os01t0857200-01	Medtr5g070210.1|PACid:23029504
Gmech0014G00150	Glyma.14G017000.1	314447|PACid:16047098	AT1G50590.1	Os09t0484800-01	Medtr5g094250.1|PACid:23032812
Gmech0014G00577	Glyma.14G067900.1	325857|PACid:16051108	AT5G13830.1	Os03t0822300-01	Medtr5g080020.1|PACid:23031161
Gmech0014G03948	Glyma.14G222500.1	895485|PACid:16057263	AT1G76080.1	Os07t0476900-01	Medtr1g026130.1|PACid:23045413
Gmech0008G01298	Glyma.08G152800.1	478619|PACid:16037132	AT3G12610.1	Os08t0505900-01	Medtr3g027940.1|PACid:23013913
Gmech0008G04290	Glyma.08G354800.1	478027|PACid:16037842	AT3G07080.1	Os06t0681700-01	Medtr7g058520.1|PACid:23024886
Gmech0008G01544	Glyma.08G180000.1	471781|PACid:16056597	AT1G15820.1	Os04t0457000-01	Medtr2g008610.1|PACid:23019252
Gmech0001G03206	Glyma.01G121700.1	478195|PACid:16047061	AT3G08920.1	Os03t0289400-00	AC235756_4.1|PACid:23053331
Gmech0001G00125	Glyma.01G013900.1	473398|PACid:16048931	AT1G32170.1	Os02t0127800-01	Medtr5g029100.1|PACid:23030494
Gmech0001G04597	Glyma.01G243100.1	479469|PACid:16038659	AT3G19553.1	Os12t0580400-01	Medtr5g005160.1|PACid:23033183
Gmech0012G02870	Glyma.12G188200.1	470906|PACid:16042415	AT1G08460.1	Os05t0440250-01	Medtr2g087270.1|PACid:23015846
Gmech0012G01021	Glyma.12G111000.1	480913|PACid:16061953	AT2G20770.1	Os04t0529600-01	Medtr6g007490.1|PACid:23027353
Gmech0012G00223	Glyma.12G026000.1	471936|PACid:16050494	AT1G17330.1	Os10t0486000-01	Medtr4g023480.1|PACid:23050274
Gmech0006G00389	Glyma.06G047700.1	890273|PACid:16043457	AT1G27480.1	Os03t0730000-01	Medtr2g075650.1|PACid:23015728
Gmech0018G00518	Glyma.18G057700.1	481930|PACid:16044064	AT2G30200.1	Os03t0297400-01	Medtr3g031380.1|PACid:23012364
Gmech0018G04200	Glyma.18G273900.1	494088|PACid:16053387	AT5G38900.1	Os03t0598900-01	Medtr7g016650.1|PACid:23024999
Gmech0016G00358	Glyma.16G042000.1	896421|PACid:16065872	AT3G03980.1	Os07t0561500-01	AC233662_54.1|PACid:23040635
Gmech0016G02477	Glyma.16G153000.1	883152|PACid:16049204	AT1G55370.2	Os03t0748300-01	Medtr6g032880.1|PACid:23027777
Gmech0009G03367	Glyma.09G196700.1	316562|PACid:16040039	AT1G76410.1	Os02t0686100-00	Medtr8g073120.1|PACid:23036729
Gmech0014G00228	Glyma.14G026500.1	490317|PACid:16045328	AT4G02485.1	Os11t0657200-01	Medtr5g091920.1|PACid:23031465

## Sheet: TableS2
Supplementary Table S2. Glycine max cv. Enrei DNA markers used for reference mapping
Chromosome	Genetic dist. (cM)	Marker name	Forward marker	Chr/Scaffold	Start position (bp)	End position (bp)	Reverse marker	Chr/Scaffold	Start position (bp)	End position (bp)	Forward marker sequence	Reverse marker sequence
Chr01	0	T000100040s	T000100040s_F	Chr01	39711	39733	T000100040s_R	Chr01	39910	39888	CTGGTTCTGTCAATTTCCTTCAG	GCAATCCACTCATTAAACTCAGC
Chr01	0.8	Sat_413	Sat_413_F	Chr01	354524	354548	Sat_413_R	Chr01	354718	354691	CTCCCTTCTTTTCCACTGAATTGA	TTTTCTCTCGGTTTCTCTCTTCTTATTA
Chr01	0.8	Sat_332	Sat_332_F	Chr01	355622	355649	Sat_332_R	Chr01	355863	355836	TAAAAACCTTTAGAAAGAACAATAAGAA	AGCAATCAATTCAAAAGAATAATGAAAA
Chr01	5.1	GMES4240	GMES4240_F	Chr01	882790	882811	GMES4240_R	Chr01	883044	883025	CATGATCCAATACCACATCACA	ACTTGCAGCAGAAGATGGCT
Chr01	10.3	Satt184-2	Satt184-2_F	Chr01	1473012	1473031	Satt184-2_R	Chr01	1473244	1473220	CCTAGCTTGCTGTGCATGAG	TGAAGCTCCATCATATATTCATGTC
Chr01	12.5	GMES3386	GMES3386_F	Chr01	1689828	1689809	GMES3386_R	Chr01	1689677	1689697	TGTTTCGACGTCGTTTCATC	CCTCTTCAGCCTTTTCCAGTT
Chr01	13.3	GMES3158	GMES3158_F	Chr01	1734839	1734820	GMES3158_R	Chr01	1734735	1734754	TTCCACAACACTTCACCGAA	GTATTACGAGCGGTTAGCGG
Chr01	13.3	GMES4052	GMES4052_F	Chr01	1750199	1750180	GMES4052_R	Chr01	1749928	1749947	AGCCATACATCTGTCACCCC	ACATCCTTGTCCTCACTGGC
Chr01	14	GMES1307	GMES1307_F	Chr01	1773051	1773070	GMES1307_R	Chr01	1773159	1773140	GTTCTCCGCGAACTCAACTC	TGGAGACCAGGAAGAACCAC
Chr01	16.7	s017000801-2	s017000801-2_F	Chr01	2060400	2060422	s017000801-2_R	Chr01	2060551	2060529	CGCATCATACTATGTCATCCACA	ATATCCGCAACATATCTTTGTCC
Chr01	17.6	C01-BARC-016475-02620	C01-BARC-016475-02620_F	Chr01	2211173	2211192	C01-BARC-016475-02620_R	Chr01	2211256	2211237	TCTTCTTCCCAAGAAGGCTG	CTTTGTGAACAGTGAATCCC
Chr01	19.1	T000102376s	T000102376s_F	Chr01	2382499	2382522	T000102376s_R	Chr01	2382707	2382685	GAACACTTCATATCCTTGCATGTT	GTGTTCACAGCATTGTTCTTAGG
Chr01	25.2	T000102848m	T000102848m_F	Chr01	2863354	2863375	T000102848m_R	Chr01	2863690	2863667	AACATGCATTCTGCGATACAAA	TTATTTGTTTCCTTAGCCTAATTT
Chr01	26.9	T000102921m	T000102921m_F	Chr01	2936496	2936518	T000102921m_R	Chr01	2936726	2936704	AAAGTTGAAGGATCAAATGTGGA	GGATCAGCTATCCTTTGCCTTAT
Chr01	30.5	T000103082m	T000103082m_F	Chr01	3097663	3097685	T000103082m_R	Chr01	3097988	3097968	TAACGAGCTTGATTGCTTAGTCC	CACAAAGTTTACATTGAGTGC
Chr01	35.6	T000103277l	T000103277l_F	Chr01	3291291	3291317	T000103277l_R	Chr01	3291663	3291641	TGTAGGTGTTTATGGTTAACTCACATT	TGCAAGTATGCACCACTTGTATC
Chr01	39	s031200036	s031200036_F	Chr01	3549417	3549439	s031200036_R	Chr01	3549781	3549757	TTGAGGGTGTCTTTGGTAAGTTG	GGCAATACTAATAAACCAGCTGAAA
Chr01	40.1	s031200132-2	s031200132-2_F	Chr01	3644893	3644914	s031200132-2_R	Chr01	3645092	3645070	AAATGGAAGATACTTTGGTTTC	ATTGACCGAACTTAAGGGTTTCT
Chr01	40.6	Satt531-2	Satt531-2_F	Chr01	3779492	3779516	Satt531-2_R	Chr01	3779880	3779861	GCAATTGCTATCTATTCCTATTCCT	GGATGTGAACGTGGATTGGT
Chr01	41.9	GMES2778.1	GMES2778_F	Chr01	3896545	3896526	GMES2778_R	Chr01	3896314	3896333	TGTGGTCCGATTGTTTGCTA	ACACCAAGCTCGAAAACCAC
Chr01	43.6	GMES0519	GMES0519_F	Chr01	3947413	3947394	GMES0519_R	Chr01	3947124	3947143	CATCAAACAACATCGGTTGG	ACGAGCCGAAACTGGTGTAG
Chr01	43.6	C01-BARC-021671-04176	C01-BARC-021671-04176_F	Chr01	3957599	3957613	C01-BARC-021671-04176_R	Chr01	3957694	3957675	AAGGGTGAAGTTCCGTAC	GATTTGTCTGTTATCCGTGA
Chr01	48.3	T000104165s	T000104165s_F	Chr01	4185728	4185755	T000104165s_R	Chr01	4185936	4185914	TGGTCTAAATTATTTCTTATCTTTACGA	CCTTTATGGGTTCTACAAGCAAA
Chr01	50.1	GMES0626	GMES0626_F	Chr01	4457136	4457117	GMES0626_R	Chr01	4456840	4456863	AGCAGGAACTGGAGTCCTCA	CAACATTTTTCCAAACACGTTAAT
Chr01	52.8	s029200170	s029200170_F	Chr01	5238278	5238301	s029200170_R				TTTAGGCTTTAACTGATCAACTTT	ATTTCTCGGTACAGATTAACCGC
Chr01	52.8	GMES4842	GMES4842_F	Chr01	5549496	5549516	GMES4842_R	Chr01	5549752	5549733	AAAACAAAACGCTTAACGCAA	CAAGTGATCGCTCATTGGAA
Chr01	53.1	C01-BARC-017943-02463	C01-BARC-017943-02463_F	Chr01	5664760	5664779	C01-BARC-017943-02463_R	Chr01	5664837	5664818	CCCTGCTTCTCCATTTTTAC	AGGGTGTGTTTGGAAAACCG
Chr01	53.6	Satt368	Satt368_F	Chr01	6926557	6926534	Satt368_R	Chr01	6926298	6926321	AGTGCAAGAAAAAGGGAGAAAATA	CTTTTCTTTCCTTTTTTTTCTCTT
Chr01	54.3	s029100034	s029100034_F	Chr01	7253897	7253872	s029100034_R	Chr01	7253613	7253635	CAGAATCTTAATATATCCGAAACAAA	CATTCCATCGTTTGGTTACAAGT
Chr01	54.7	GMES0899	GMES0899_F	Chr01	7373706	7373725	GMES0899_R	Chr01	7373940	7373921	GGCAACACTGTCATCACACC	GACGATACATCAGCTGGCAA
Chr01	55.5	Sat_353	Sat_353_F	Chr01	7728528	7728555	Sat_353_R	Chr01	7728766	7728740	GTCACTCGGCTAAGTAATTGTGTAGAAA	GGTAATGCTAGGTTTTGGAAAATGATT
Chr01	56.8	C01-BARC-015055-02546	C01-BARC-015055-02546_F	Chr01	10812268	10812287	C01-BARC-015055-02546_R	Chr01	10812346	10812327	TTCAGGGAATGAATGAAGGG	CAGCAGGTTTTTCTACGTTG
Chr01	57.9	Satt221	Satt221_F	Chr01	24274598	24274619	Satt221_R	Chr01	24274804	24274786	ATTGTACCACTAAAAACCATAG	GCAAACCATTATCTTCATT
Chr01	57.9	GMES4431	GMES4431_F	Chr01	25843651	25843632	GMES4431_R	Chr01	25843272	25843291	GGAACGGTAGCGGAGTACAA	AGCTCCACCGTTTCTCTTCA
Chr01	61.5	s011700279r	s011700279r_F	Chr01	29050396	29050380	s011700279r_R	Chr01	29050173	29050194	CCACCCTTTCTCGCACC	TGATTTGATCCACTAATACCAA
Chr01	61.7	Sat_346	Sat_346_F	Chr01	33260226	33260205	Sat_346_R	Chr01	33260084	33260103	GTACGGCATCTGCAATGACTTT	GAGCCAACCACCTCAGTATC
Chr01	64.7	C01-BARC-039815-07590	C01-BARC-039815-07590_F	Chr01	41168558	41168577	C01-BARC-039815-07590_R	Chr01	41168643	41168624	CTGAATCCGCTCACTTGTTG	TTGTATGTCTTCAGCCCTGC
Chr01	64.7	Sat_201	Sat_201_F	Chr01	42510477	42510460	Sat_201_R	Chr01	42510207	42510224	ATCGTTAACTCCTTACAC	GCCCAGAAGTAGTCAAAG
Chr01	65	C01-BARC-040871-07859	C01-BARC-040871-07859_F	Chr01	43430440	43430459	C01-BARC-040871-07859_R	Chr01	43430513	43430494	TGCAACCATTAACAATACCG	GCTATGTTGTTTTCACAAGG
Chr01	65.8	GMES1291	GMES1291_F	Chr01	43934610	43934629	GMES1291_R	Chr01	43934886	43934867	ACACTGCCTCAAGGAGGAAA	CCAAGCCTATACCACCACCA
Chr01	67.7	C01-BARC-043191-08551	C01-BARC-043191-08551_F	Chr01	44790270	44790289	C01-BARC-043191-08551_R	Chr01	44790349	44790330	TGCGTAATGAATCTTGTCCC	ATGACAGTGTGCACTTGACC
Chr01	70.1	Satt370	Satt370_F	Chr01	47375561	47375539	Satt370_R	Chr01	47375336	47375356	GTTAAGGGAATTTGTAACTTGAA	ATCATGCATTTATTTGAGATA
Chr01	71.7	s001302387	s001302387_F	Chr01	48037288	48037309	s001302387_R	Chr01	48037396	48037374	CCACCGACGTGTCGCACGATGAGAGGTAGGCACAACTCC	ATCAGATTCTCGATCAATTCTTT
Chr01	71.7	s001302706	s001302706_F	Chr01	48357272	48357295	s001302706_R	Chr01	48357408	48357389	AAGTTACTTCCATCCAACTATAAA	TTTCAACTGGCCAATATCAT
Chr01	75.1	T000147811l	T000147811l_F	Chr01	48682828	48682851	T000147811l_R	Chr01	48683134	48683114	TCAAATACTGATTCCTTGCATATT	GATCGGCTAGTTCTCCCAGTATAA
Chr01	79.6	s001303327-2	s001303327-2_F	Chr01	48977791	48977814	s001303327-2_R	Chr01	48977990	48977967	TGAGTCTATGAGTCGAGTTTATGA	TTGTACATTTGTTGCAGTTAAATA
Chr01	82	T000148451m	T000148451m_F	Chr01	49328092	49328115	T000148451m_R	Chr01	49328422	49328399	GTTCTCTCGAGAATACTAACTCAT	TTCACTTTAAATCTTTAACCAATG
Chr01	87.2	Satt436	Satt436_F	Chr01	49567977	49568000	Satt436_R	Chr01	49568192	49568168	TATAAAGAAAAACGAGCATATCAT	CTTATAAAGGCTTGTGAAAGACACT
Chr01	88.1	Satt468	Satt468_F	Chr01	49731987	49731963	Satt468_R	Chr01	49731775	49731799	TCTCTTATTTTGACCTTTTTAACTT	TTTTGTATTTGGTCTATCTGCTTAG
Chr01	88.3	Satt077	Satt077_F	Chr01	49780906	49780881	Satt077_R	Chr01	49780794	49780810	GATCTAAAGTCTGATATTTTTAACTA	AAAAGGAGAAGGAATGC
Chr01	89.4	T000149090l	T000149090l_F	Chr01	49968838	49968860	T000149090l_R	Chr01	49969181	49969159	AGATGTTGCCATTACTCAAATGC	GAAACTGAGGAGCTGAAAGGTGT
Chr01	92.6	s001304421	s001304421_F	Chr01	50072545	50072567	s001304421_R	Chr01	50072941	50072919	AGATTTGATGACACTAGCGGTCT	AGGTTGAATGCACAAATTAAAGC
Chr01	94.6	s001304710	s001304710_F	Chr01	50362863	50362886	s001304710_R	Chr01	50363218	50363197	AAATGATGGATGAGAATCCAAGTT	CCAGACCCACAATCCATATCAT
Chr01	95.9	s001305022	s001305022_F	Chr01	50674958	50674980	s001305022_R	Chr01	50675152	50675130	GGACAAATTCCATTGTTTAAGGG	CCCTCAACTTTAAATTCAATCAA
Chr01	99.6	s001305363	s001305363_F	Chr01	51016726	51016748	s001305363_R	Chr01	51016901	51016882	ACCTTGACACGGTAATGAGAAAT	TTTAAAGGACAAAGGGCAAA
Chr01	102.6	T000150333m	T000150333m_F	Chr01	51215869	51215893	T000150333m_R	Chr01	51216187	51216165	TTGCTAGATAACAAGCTAACAAATG	CATTCGTTGAAAGCTAGATTCGT
Chr01	105.1	s001305760	s001305760_F	Chr01	51411831	51411857	s001305760_R	Chr01	51412231	51412209	AAAGACTACAAATACAAATAAGTCTCA	TTCCTACCATGTATTAATGCCCA
Chr01	108.1	T000150800s	T000150800s_F	Chr01	51683230	51683253	T000150800s_R	Chr01	51683412	51683390	AATAGAATTATTTAAACACGCCTT	ATTCTATCTTGGAGAGATGACCG
Chr01	112	s001306372-2	s001306372-2_F	Chr01	52022983	52023009	s001306372-2_R	Chr01	52023115	52023093	AGATGTACTACTACTTAAACAGCAAGA	ATAAGATTCTTGAGGCACTGAGC
Chr01	113.6	Sat_414	Sat_414_F	Chr01	52334653	52334633	Sat_414_R	Chr01	52334438	52334458	TTGTGCTTAGGGAAAATAAAA	AAAAACACTGTCTGAAATACT
Chr01	113.6	Sat_305	Sat_305_F	Chr01	52377465	52377491	Sat_305_R	Chr01	52377796	52377772	ACAATGCAAAACACATTTGTATTACTT	CTATGCCCATGTGTTTAGTGATTAG
Chr01	114.4	C01-BARC-021569-04147	C01-BARC-021569-04147_F	Chr01	52434533	52434514	C01-BARC-021569-04147_R	Chr01	52434448	52434467	CGCAGCAGTCAAGTATCCAC	GCAAGTCTCAACACATTCCG
Chr01	114.4	GMES4584	GMES4584_F	Chr01	52584054	52584035	GMES4584_R	Chr01	52583820	52583839	GAGTCCATCGTCGAGGTCAT	CCCCCATTTCAGTTGTTCTT
Chr01	118.5	s001307253	s001307253_F	Chr01	52907362	52907385	s001307253_R	Chr01	52907714	52907692	AAGACTTTATTTAAGGAATCCAAA	TAATCAATTTCCGATCAACATCC
Chr01	120.7	T000152201s	T000152201s_F	Chr01	53085377	53085398	T000152201s_R	Chr01	53085585	53085563	AGGTACATCAAACAGCACCACA	AAAGCTTTATCGTTCCACACGTA
Chr01	123.7	s001307583	s001307583_F	Chr01	53238326	53238348	s001307583_R	Chr01	53238490	53238468	CCACGAATCTATTTGTTACCCAG	TTAAAGTCACATCAAGTTAACGG
Chr01	127.3	T000152766m	T000152766m_F	Chr01	53648534	53648556	T000152766m_R	Chr01	53648826	53648804	AAAGAATAGAGGGAATATGATGT	TTTAGGGATGACGAGTGACAACT
Chr01	130.6	s001308421	s001308421_F	Chr01	54072696	54072718	s001308421_R	Chr01	54072866	54072844	ATACACAGAGAGACGTGTGCATT	ACATTACAACCTCAGCTTCCAAA
Chr01	135	s001308859-2	s001308859-2_F	Chr01	54533994	54534015	s001308859-2_R	Chr01	54534417	54534395	AAACTACGGTGCATAACACAAA	ACTACGAAGACTACACCGTGGAC
Chr01	136.4	Satt147	Satt147_F	Chr01	54826429	54826448	Satt147_R	Chr01	54826598	54826574	CCATCCCTTCCTCCAAATAGAT	CTTCCACACCCTAGTTTAGTGACAA
Chr01	137.2	Satt129	Satt129_F	Chr01	55164063	55164090	Satt129_R	Chr01	55164211	55164188	TTCAGTACAAGTCGGGTGAATAATAATA	TCACATGTTCGGGACTTAAGGTAT
Chr01	137.2	C01-BARC-040447-07743	C01-BARC-040447-07743_F	Chr01	55349032	55349013	C01-BARC-040447-07743_R	Chr01	55348954	55348973	CGACTTATTTCCTTCTTTGG	GTTTGCAGATAACGAGGATG
Chr01	137.3	GMES0765.1	GMES0765_F	Chr01	55521842	55521823	GMES0765_R	Chr01	55521705	55521722	TGCTTGCTGCCTCTTATTCA	TGGCTATACGTGTGTGTGTGC
Chr01	138.5	GMES0281	GMES0281_F	Chr01	55570772	55570753	GMES0281_R	Chr01	55570577	55570596	TCACCACCAACCCTCTAACC	CAGTGTCGGGACTACAAGCA
Chr01	141.2	GMES4224	GMES4224_F	Chr01	56379566	56379585	GMES4224_R	Chr01	56379715	56379696	CCCAAGAGTTTGGAGCTCTG	TTCACGCGCTTTCCTACTTT
Chr01	142	T000155868l	T000155868l_F	Chr01	56782044	56782066	T000155868l_R	Chr01	56782414	56782392	CGATTATTTGCAACGTTAGAAGG	AGTAACATTATTGGCAGTGCTGA
Chr02	0	T000200100l	T000200100l_F	Chr02	98978	99000	T000200100l_R	Chr02	99323	99301	CCTCAACCCTGTCAAGTAACACA	AGAAACAAGACATGGTGATGGAT
Chr02	0	C02-BARC-013955-01283	C02-BARC-013955-01283_F	Chr02	133052	133071	C02-BARC-013955-01283_R	Chr02	133115	133096	GATTCTTCTCTTGCTGCCAC	GAGCATTTGATGTCATCGAG
Chr02	0.5	T000200458l	T000200458l_F	Chr02	457059	457081	T000200458l_R	Chr02	457370	457348	GTGCAAAGGCTATATTGGGAAGT	CATATGCAGTCACGATCAAGAAA
Chr02	0.7	alphaP-AT17.1
Chr02	2.1	T000200778l	T000200778l_F	Chr02	776747	776769	T000200778l_R	Chr02	777093	777071	GGTAGAATAGAAGGAGGGAGCAC	ACTGTTCTTTGGTGGTGATGAAC
Chr02	6.6	T000201012s	T000201012s_F	Chr02	1010649	1010673	T000201012s_R	Chr02	1010849	1010827	TCTTTATTCTTTATTTGAGACCGGA	GAGAGTTATGTCTTCGTTCACGG
Chr02	9.3	s016800026	s016800026_F	Chr02	1319271	1319249	s016800026_R	Chr02	1319008	1319030	TGATCGAAAGCTCTAATCCTCAG	GCTCTTCGTAGAAACCAAGCATA
Chr02	10.4	s031800033	s031800033_F	Chr02	1462265	1462243	s031800033_R	Chr02	1461945	1461967	AATGGAGGGAAATTGAGATTGTT	GTACATGGCCCTGCAAACATAGT
Chr02	15.4	Sat_096	Sat_096_F	Chr02	1783743	1783769	Sat_096_R	Chr02	1783936	1783914	ATTATAGGGAGTAACCACAAAGAAAAA	GCTAGCTACCTGCCAGTGATTAT
Chr02	15.6	GMES0767	GMES0767_F	Chr02	1902422	1902403	GMES0767_R	Chr02	1902126	1902145	TTTCAAAATCAAACGCCAAA	CGAAACACCATGGAACACAG
Chr02	16.4	Sat_279	Sat_279_F	Chr02	2004612	2004638	Sat_279_R	Chr02	2004880	2004853	TTGCGTTGTTACGTGAAAGCACAGAAAC	ACTGGTTAATCTAGTCAGACTTAACAGA
Chr02	20.9	T000202368m	T000202368m_F	Chr02	2398219	2398241	T000202368m_R	Chr02	2398436	2398414	CACTAATCTTCCATTCTGGCAAT	ATCCATTACTGAACGTCTTGGAA
Chr02	21.9	GMES2778	GMES2778_F	Chr02	2677776	2677795	GMES2778_R	Chr02	2678015	2677996	TGTGGTCCGATTGTTTGCTA	ACACCAAGCTCGAAAACCAC
Chr02	23.6	GMES1360	GMES1360_F	Chr02	3086631	3086612	GMES1360_R	Chr02	3086402	3086421	TGCAGAAAAGATGCCACAAC	CCTTCTTCCCTTCCTGCTCT
Chr02	23.8	GMES0949	GMES0949_F	Chr02	3144990	3144971	GMES0949_R	Chr02	3144807	3144826	TCACAGAGAAAGATGGCTGC	CTGAGAACCAACCGGGAATA
Chr02	25.2	GMES2512	GMES2512_F	Chr02	3571818	3571837	GMES2512_R	Chr02	3571921	3571902	CCTATACCACCCATTCACCG	CATGTTGGGTGCTTCATCTG
Chr02	25.2	GMES3944	GMES3944_F	Chr02	3687825	3687806	GMES3944_R	Chr02	3687674	3687693	ACACCTTCTCTCCTCCAAGG	GCCCAAGTGGAACACTGAAT
Chr02	27.3	Satt216	Satt216_F	Chr02	4104630	4104611	Satt216_R	Chr02	4104448	4104470	TACCCTTAATCACCGGACAA	AGGGAACTAACACATTTAATCATCA
Chr02	28.4	GMES4519	GMES4519_F	Chr02	4458389	4458408	GMES4519_R	Chr02	4458485	4458466	TCACACTTTCAACCCCATCA	CGAGTTTGCATCATCATTGG
Chr02	29.2	C02-BARC-016063-02051	C02-BARC-016063-02051_F	Chr02	4596742	4596723	C02-BARC-016063-02051_R	Chr02	4596664	4596683	AAGAAGGGCCAACTCTTCAG	ATGTTGCTCTTCAGCCGTTC
Chr02	30.5	Sat_351	Sat_351_F	Chr02	4904884	4904865	Sat_351_R	Chr02	4904610	4904629	CCACCCAAGGGCATCTTTCG	GGCCGCAACTATGAAAAGAC
Chr02	33	GMES6916	GMES6916_F	Chr02	5122188	5122169	GMES6916_R	Chr02	5121897	5121916	CTCTCCGATTCAATTCCCAA	CCTTGGTCAGCCATCAAACT
Chr02	34.9	GMES0303	GMES0303_F	Chr02	5362546	5362527	GMES0303_R	Chr02	5362289	5362308	GCCTCCTGTATCTCTTTGCG	TGAGGAATTTCGGCTACACC
Chr02	35.1	GMES0671	GMES0671_F	Chr02	5389204	5389185	GMES0671_R	Chr02	5389066	5389084	GTTGAAGAGGGAATTTGCCA	AAAGAAGACGAAGGCGATGA
Chr02	35.1	GMES0637	GMES0637_F	Chr02	5440875	5440894	GMES0637_R	Chr02	5441152	5441133	GTCACTCACGCTAGGGCTTC	TGCAACTTTGAGAGGAGGAA
Chr02	36.4	C02-BARC-045259-08916	C02-BARC-045259-08916_F	Chr02	5670734	5670753	C02-BARC-045259-08916_R	Chr02	5670829	5670810	CAGTAGTTGCAAGACTATGG	GTGTTTGAATTTGACTTGTG
Chr02	39.1	T000206013m	T000206013m_F	Chr02	6071140	6071162	T000206013m_R	Chr02	6071470	6071447	CTTAAATGACACAGCTACTGGCG	AAAGGATTTGACTGATAATCGAAG
Chr02	41.8	GMES5577	GMES5577_F	Chr02	6662386	6662367	GMES5577_R	Chr02	6662156	6662181	GACTCTGCAGCTCAAAACCC	GATTTTGACCACAAATTAAGAGATTT
Chr02	43.9	T000206938m	T000206938m_F	Chr02	7015369	7015391	T000206938m_R	Chr02	7015692	7015670	GACACCTCTCTTCCACAAAGATT	TAGTTTGTCCTCTTATGCTGCCA
Chr02	47.9	s013000037-2	s013000037-2_F	Chr02	7322114	7322135	s013000037-2_R	Chr02	7322233	7322211	AATTAATTTGATTGGGCTGTTT	TTTAATTGTTATGTACGGTAAGC
Chr02	49.6	s013000204-2	s013000204-2_F	Chr02	7488875	7488894	s013000204-2_R	Chr02	7489024	7488998	GGGATTTCTAGTGGAGTTCA	TTAAAGTGCATACCTCTAGTTATTATT
Chr02	51.5	GMES1698	GMES1698_F	Chr02	7827002	7826983	GMES1698_R	Chr02	7826721	7826741	AACCTTCCAATGCTTGTTGC	TGCGATAAAGTGGTGAAATCC
Chr02	52.9	T000208383m	T000208383m_F	Chr02	8471689	8471710	T000208383m_R	Chr02	8471973	8471949	ATAAATCATGGGTGAGCGAGAG	AACATGATCATTAATAGTTGAACGG
Chr02	56.4	C02-BARC-040713-07825	C02-BARC-040713-07825_F	Chr02	8774729	8774710	C02-BARC-040713-07825_R	Chr02	8774663	8774682	GGGCATATAACAAGCTCAAG	GGCAATTTTTGGTGCTTAAC
Chr02	56.4	Satt701	Satt701_F	Chr02	8792920	8792901	Satt701_R	Chr02	8792686	8792707	CTCAGCGGAAAGCCTTCTCA	ATGTCGCACCTACACCCAAAAA
Chr02	56.4	Sat_211	Sat_211_F	Chr02	8831522	8831542	Sat_211_R	Chr02	8831777	8831752	ATCACCGGACTTAGAGAGTTA	GAGCTAATTAAAAAGTCATTCCAATA
Chr02	56.4	s022200063	s022200063_F	Chr02	9415299	9415320	s022200063_R	Chr02	9415658	9415636	ACAAGTTTGCGTCAAGGGTAAT	CCATAATGGGCGTACTTATACCA
Chr02	56.7	Sat_173	Sat_173_F	Chr02	9481942	9481923	Sat_173_R	Chr02	9481693	9481714	GGGATGGCCTTTTATTCTAC	TGTCTCCATTGCTACGACTAAG
Chr02	57	C02-BARC-025955-05182	C02-BARC-025955-05182_F	Chr02	9688781	9688762	C02-BARC-025955-05182_R	Chr02	9688693	9688712	GAACTCATCAATGCCTGCAC	TTGGTACCATGCCAAAGGAG
Chr02	58.3	GMES0884	GMES0884_F	Chr02	10121539	10121520	GMES0884_R	Chr02	10121339	10121358	CACTCATTTTCCTTCCCCTG	TGATTCCAGATCCACGTTCA
Chr02	61	Satt558	Satt558_F	Chr02	10618848	10618868	Satt558_R	Chr02	10619071	10619051	CTCACACCCTTTCATTATCTA	AAATCGCGCATCTAAATTTAC
Chr02	61	s026600230	s026600230_F	Chr02	10698496	10698518	s026600230_R	Chr02	10698754	10698732	GATGGATTCGACATTCAGACTTT	CAACTCATTCATACTCTTTCGGG
Chr02	61	s026600239	s026600239_F	Chr02	10707262	10707284	s026600239_R	Chr02	10707651	10707629	TACAACGTGTGAATATTGCCAAA	ATGCTTGCTCTCGTATGATTTCT
Chr02	61	s026600256	s026600256_F	Chr02	10724294	10724316	s026600256_R	Chr02	10724627	10724605	AAACCCTTCCATTGGAGTTAGAG	AGTGTCGAAGTGCTTGATCGAAT
Chr02	62.6	s026600345	s026600345_F	Chr02	10814234	10814252	s026600345_R	Chr02	10814543	10814522	TTTGCTCATGTATGGTGGG	CTTGAATACATATGTTGGGTTC
Chr02	62.6	s026600346	s026600346_F	Chr02	10815292	10815315	s026600346_R	Chr02	10815627	10815605	CGTCGATCTTATAAACAACTTCCA	GTTGTTGAGGGATGAGAAAGAAA
Chr02	63.2	s023400007	s023400007_F	Chr02	10843817	10843839	s023400007_R	Chr02	10844153	10844131	CGGCTCTTTCATTTCTTCTTCTT	CGTACGTGCTGAATAATGTTGAA
Chr02	63.2	s023400009	s023400009_F	Chr02	10846097	10846117	s023400009_R	Chr02	10846399	10846377	CCCAATGTGAAATTATGAACACC	ATAGAAACTGGAATTTGAAGCCC
Chr02	63.2	s023400019	s023400019_F	Chr02	10855895	10855917	s023400019_R	Chr02	10856205	10856183	ACTGACGATCAACCAGGTTAAGG	TCAATGTGCTAGAGTTATGCACG
Chr02	64.5	GMES0777	GMES0777_F	Chr02	11300972	11300989	GMES0777_R	Chr02	11301175	11301156	CGCACCTCTTGTCCAGAAAT	AGTGAGGGCAAGAAAAAGCA
Chr02	65	s023400577	s023400577_F	Chr02	11415619	11415641	s023400577_R	Chr02	11415940	11415921	TTGTTGTACATGGGACCTTTCTT	TTTGGACACACCAAAGGAGA
Chr02	65	s021200808	s021200808_F	Chr02	11676658	11676636	s021200808_R	Chr02	11676389	11676411	TTCTAACTTCTAACGCATGCTCC	TGAGAGAAGAAGGAGAAACCAAA
Chr02	65.3	s021200706	s021200706_F	Chr02	11778701	11778679	s021200706_R	Chr02	11778418	11778440	TCAGTAAGGTAGTCCCACTTTGG	TATTCTGGGAGGAAGCACCTTAT
Chr02	65.3	C02-BARC-040465-07747	C02-BARC-040465-07747_F	Chr02	11825569	11825550	C02-BARC-040465-07747_R	Chr02	11825473	11825492	GCATTTTTGTTTGACAATCC	CCTCGTGGAAGTGTTCATTT
Chr02	65.6	s021200597	s021200597_F	Chr02	11885168	11885146	s021200597_R	Chr02	11884881	11884903	TTGAATAACCAATGTGATGAGGC	TTAAAGGATAACAACAACAAACA
Chr02	65.8	s021200522-2	s021200522-2_F	Chr02	11960130	11960108	s021200522-2_R	Chr02	11959789	11959811	CACATTGACACTCTTGGAAGTGA	AAATTTACCTGCATAGTGCGAAA
Chr02	65.8	s021200446	s021200446_F	Chr02	12035802	12035780	s021200446_R	Chr02	12035700	12035718	TTGGTTCAATATCAACGATTCTG	GAGATCGATGCATCCCTTG
Chr02	66.1	s021200320	s021200320_F	Chr02	12161903	12161874	s021200320_R	Chr02	12161721	12161743	CATGAAAGTAATAAGTTGTTATTAGGAGAA	ACTCTGCTAATATGGTGGTGGTG
Chr02	66.4	s021200291-2	s021200291-2_F	Chr02	12190488	12190465	s021200291-2_R	Chr02	12190100	12190122	TTTCTGTCAGCATTCTAAGAGTTT	GAAGTACACATGTTTCGCACAGA
Chr02	66.6	s021200143-2	s021200143-2_F	Chr02	12338700	12338678	s021200143-2_R	Chr02	12338244	12338265	TGAATAGAAAGCGCACTTGTACC	AAATCGCAACCTTATTCATTGC
Chr02	66.9	s021200060-2	s021200060-2_F	Chr02	12421496	12421474	s021200060-2_R	Chr02	12421368	12421390	CTCTTGCCAAATCTCAACACTCT	TGACCTTGGATCAGTGACGTAAT
Chr02	66.9	s021200007	s021200007_F	Chr02	12474290	12474268	s021200007_R	Chr02	12474152	12474175	CATCAGCAATCCTCTCTCTCCTA	TGCTCAATCATTTCACACTAAACA
Chr02	69.6	s028700116r	s028700116r_F	Chr02	12606030	12606005	s028700116r_R	Chr02	12605796	12605817	GCTCCATTGTCATGTTTATCTTAATC	TTTGGAACATCAATTAGACAAT
Chr02	69.9	s019700968-2	s019700968-2_F	Chr02	12761430	12761408	s019700968-2_R	Chr02	12761225	12761243	TTTCCATGGTAAGAGGGACATAC	AAACAATAGTTGGGAATTTGAA
Chr02	70.1	s019700760	s019700760_F	Chr02	12967253	12967230	s019700760_R	Chr02	12967054	12967077	TCATCAATATATAATTGCACTCAA	CTTCATAGAATCACATCCAAATTA
Chr02	70.1	s019700759	s019700759_F	Chr02	12967915	12967893	s019700759_R	Chr02	12967724	12967747	GGCATGCCACAACTAAGAACTAA	AATCCCACTAATCAAATTTATCTC
Chr02	70.9	Satt542	Satt542_F	Chr02	13315810	13315789	Satt542_R	Chr02	13315607	13315628	CACCAGCACAGAACAATCATTT	CACGGTCTAACCTTTCCTTCTA
Chr02	70.9	Satt296	Satt296_F	Chr02	13335189	13335171	Satt296_R	Chr02	13335005	13335027	GCCCCACAACCAGAAACAC	GAAATTTGGCGACTAAAAACTGC
Chr02	70.9	s019700394-2	s019700394-2_F	Chr02	13335185	13335164	s019700394-2_R	Chr02	13335050	13335073	CACAACCAGAAACACCCAATTC	AAAGACAGCCCTAAACTTAAAGGA
Chr02	70.9	s019700302-2	s019700302-2_F	Chr02	13426424	13426402	s019700302-2_R	Chr02	13426290	13426314	AATACGGGTCCTGAAATGTAGGT	TTTGTCTTACAACATAATATTGAGC
Chr02	70.9	s019700026	s019700026_F	Chr02	11439495	11439471	s019700026_R	Chr02	11439112	11439136	TGACATAGAACTCTGCTAGCAACAC	ATTGTCAAAGTGCATTTGCTTTTAT
Chr02	73.7	T000213573m	T000213573m_F	Chr02	13768070	13768092	T000213573m_R	Chr02	13768359	13768341	AGTAATGACCCTTTAACCATGCC	TCTTAAATCAATGGTCGTTGGAC
Chr02	77.6	GMES1732	GMES1732_F	Chr02	14218111	14218130	GMES1732_R	Chr02	14218342	14218323	ATATCTGGGCCCCCATTAAG	AGGTGTGGGACAGCTTTTTG
Chr02	80.3	GMES0031	GMES0031_F	Chr02	14485421	14485402	GMES0031_R	Chr02	14485183	14485202	ATTCTTCCACAGCATACCCG	GAAGATGCAAGTCCTGCTCC
Chr02	81.1	GMES0271	GMES0271_F	Chr02	14653054	14653035	GMES0271_R	Chr02	14652903	14652922	GAACAATTGAGGTCGACGGT	GCAACACACATGCATTCTCC
Chr02	85.3	T000214752m	T000214752m_F	Chr02	14952948	14952970	T000214752m_R	Chr02	14953227	14953205	CCAATGACGATACATACAAAGCA	TTGGTTCATGTCTGACAAATAGG
Chr02	87.4	T000214950m	T000214950m_F	Chr02	15151305	15151328	T000214950m_R	Chr02	15151611	15151587	TTAGTTAATTTCATCAGCGTGTCA	GGCATAATTAAGAGATTATACGGAA
Chr02	91	T000215049s	T000215049s_F	Chr02	15251032	15251054	T000215049s_R	Chr02	15251204	15251182	ATTAGTCCCTTAGCGTGGAAACT	AAGTTAGGGTGAATCTCGTCAAA
Chr02	92.4	s004305162-2	s004305162-2_F	Chr02	15342289	15342267	s004305162-2_R	Chr02	15341992	15342014	GAGTGCAACTTGGTCCAGATATT	ATTTCTCATGTTGCTTTGACGTT
Chr02	95.8	s004304842-2	s004304842-2_F	Chr02	15664104	15664077	s004304842-2_R	Chr02	15663730	15663752	TGGTAAAGAATTTACTGTTACTCAATCA	TCCTCTAGTCAAGGATTCACCTG
Chr02	100.1	Satt537	Satt537_F	Chr02	15992899	15992878	Satt537_R	Chr02	15992748	15992769	TGTACATCAAAATGGTGTATTC	GGAGGAACTTTGTCTCAGTAAT
Chr02	100.1	s009401425	s009401425_F	Chr02	21093139	21093161	s009401425_R	Chr02	21093352	21093330	TGAACACAATTGTAAGGGACCAT	ATTGCGTTCAGAGCTTCAGAGTA
Chr02	100.1	s000600215-2	s000600215-2_F				s000600215-2_R				TCAATCCAACGATGAGTTCTAAG	GAATCATAGAAGCAATGGCAAA
Chr02	100.9	GMES4211	GMES4211_F	scaffold_2140	1	20	GMES4211_R	scaffold_2140	193	174	GAACTACCGCTACGGTTCCA	GGAGCCATTAGGGATTCTCC
Chr02	101.4	Satt611	Satt611_F	Chr02	28902329	28902349	Satt611_R	Chr02	28902538	28902516	GGGAATAATAAGAATATGGAC	CTTTCACTATGTGACCTGAATTA
Chr02	103	s001500012-2	s001500012-2_F	Chr02	37722715	37722735	s001500012-2_R	Chr02	37723069	37723044	TGAATCCCGGTGATCAATATG	CAACCAAGTTAAATGATAGAAGTTCA
Chr02	103.3	s001500409-2	s001500409-2_F	Chr02	38119282	38119305	s001500409-2_R	Chr02	38119649	38119627	AGAACTTAATAAACTTGCTTTCAA	CTAATTTCTTTGCAGGCATCCTA
Chr02	103.9	s001500947-2	s001500947-2_F	Chr02	38656545	38656568	s001500947-2_R	Chr02	38656731	38656709	TTTGTCATCACATCTTGGATTATG	CACAGCACTAATATGACAGGACC
Chr02	106	T000242057m	T000242057m_F	Chr02	38984421	38984443	T000242057m_R				TCTGATTTCAAAGGCTAACAAGG	TAACAATGACGGTAGTCCTTTGG
Chr02	107.9	T000242267l	T000242267l_F	Chr02	39194090	39194112	T000242267l_R	Chr02	39194470	39194447	AAATTCTGCAGCAAACTTCTTGT	GGAGAAGTATAGAGTCTCACGTCG
Chr02	111.2	T000242517s	T000242517s_F	Chr02	39444288	39444310	T000242517s_R	Chr02	39444464	39444442	TTCATCTTGCATCTCAAACTCTG	TGAGTCATCCATGCGAATATACA
Chr02	113.3	T000243113s	T000243113s_F				T000243113s_R	Chr02	40034894	40034872	TGTAAGTTTCGTATATTTCGATATCCC	TAAGAATTGAAGTCATCTTGGTT
Chr02	114.4	Satt546	Satt546_F	Chr02	40698078	40698098	Satt546_R	Chr02	40698317	40698297	TGAGCGATCAAGAAGCACTTA	TTTGGATCGCATAACACTTTA
Chr02	114.9	GMES4599	GMES4599_F	Chr02	40991956	40991978	GMES4599_R	Chr02	40992219	40992200	AACTGCTTGTAACCCTTATGCAG	GAGTTGAAGCAGTCCGATCC
Chr02	114.9	C02-BARC-018115-02528	C02-BARC-018115-02528_F	Chr02	40997808	40997789	C02-BARC-018115-02528_R	Chr02	40997723	40997742	GACTAGTGCGAGTAGGAATC	TCTGGGAAGAGTCAAACCAC
Chr02	116.8	T000244457l	T000244457l_F	Chr02	41377361	41377386	T000244457l_R	Chr02	41377703	41377677	GCTTATTTACTATGCTATAGAGCGGC	TTAATAGATTCACCCTTGAGTACAACC
Chr02	119.8	s001504057-2	s001504057-2_F	Chr02	41758020	41758042	s001504057-2_R	Chr02	41758382	41758360	GAGTTCGATTCTTAAGCTGATGC	CACATTGTCACCAACCAGTTAAA
Chr02	120.9	s001504461-2	s001504461-2_F	Chr02	42162054	42162077	s001504461-2_R	Chr02	42162193	42162171	AGCATCTAGCACAATACTTATACA	AAATAATATGTGCCGAGGTTGAC
Chr02	122.2	C02-BARC-030361-06860	C02-BARC-030361-06860_F	Chr02	42735897	42735878	C02-BARC-030361-06860_R	Chr02	42735816	42735835	CACCTTCATGAACATCATCC	GCAAACTGAATCTAGTCCTG
Chr02	123.3	s001505206-2	s001505206-2_F	Chr02	42908969	42908991	s001505206-2_R	Chr02	42909112	42909090	GAAAGGACGTAGTATCAAATGGC	AAATCACAGTTTGGATTCATCGT
Chr02	125.9	Sat_069	Sat_069_F	Chr02	43277640	43277655	Sat_069_R	Chr02	43277795	43277774	CGACCAGCTGAAGAAA	CTGAATACCCATCATTACTTAA
Chr02	128.5	s001505884-2	s001505884-2_F	Chr02	43592575	43592598	s001505884-2_R	Chr02	43592754	43592728	TCATTGATAACATGTGCATTGATT	AAAGTTAAGTAGATAATTCTAGCCTTT
Chr02	132.9	T000247139s	T000247139s_F	Chr02	44049390	44049414	T000247139s_R	Chr02	44049563	44049541	TGATTTGATATCTCTTGTTAAGGTC	TTTGTGTGGGAGACTTATGTTTG
Chr02	134.5	C02-BARC-026065-05239	C02-BARC-026065-05239_F	Chr02	44225255	44225274	C02-BARC-026065-05239_R	Chr02	44225352	44225333	ATCTGTTATGCCTTCACCCG	GAAGTGACATCAATACTGAC
Chr02	134.6	s001506608-2	s001506608-2_F	Chr02	44315937	44315964	s001506608-2_R	Chr02	44316124	44316102	GACATGTAGGAGATTAGTTTGATAGCAC	ACCCGATATCTAAACATATCAAA
Chr02	139.1	GMES0650	GMES0650_F	Chr02	44791370	44791390	GMES0650_R	Chr02	44791502	44791483	CGAGCACTTTAACATAAAATCACAA	GATGTATCGGTTGCTGGGTT
Chr02	140.9	C02-BARC-045013-08864	C02-BARC-045013-08864_F	Chr02	45057885	45057904	C02-BARC-045013-08864_R	Chr02	45057975	45057956	GTATCCTCTGATAGCTAGGG	GAGGAGGATAGCCGTAAAGG
Chr02	143	Satt274	Satt274_F	Chr02	45265479	45265501	Satt274_R	Chr02	45265661	45265640	GGGTCAATTAGTTTTCGTCAGTT	CACGGTATATAATCGAACCTAT
Chr02	143	Satt459	Satt459_F	Chr02	45309728	45309703	Satt459_R	Chr02	45309548	45309569	TCGTGTTAGATTTTTACTGTCACATT	AACTGCATACCCTTTGTTTGAA
Chr02	144.1	T000248469s	T000248469s_F	Chr02	45387750	45387773	T000248469s_R	Chr02	45387939	45387917	AAAGAGAGCAAAGAGTGGTTCATT	AGTTCGAGGCAACAAACTCTAAC
Chr02	144.6	T000248521l	T000248521l_F	Chr02	45440122	45440144	T000248521l_R	Chr02	45440477	45440455	GTGGAGCATACTCATATGAAGCC	CAACATTCGGATTTCCAAGTAAC
Chr02	144.6	T000248608l	T000248608l_F	Chr02	45526881	45526906	T000248608l_R	Chr02	45527225	45527203	TCTCATTCTTATCTTATCTTGCATGG	TTTCTGCCGTGTATTATTTGGTT
Chr02	144.6	T000248608l	T000248608l_F	Chr02	45526881	45526906	T000248608l_R	Chr02	45527225	45527203	TCTCATTCTTATCTTATCTTGCATGG	TTTCTGCCGTGTATTATTTGGTT
Chr02	147.9	T000248854s	T000248854s_F	Chr02	45773489	45773511	T000248854s_R	Chr02	45773635	45773614	AACAAAGGATCTAAAGGCCAAAC	TCCTAGCCTTCTGATCTTCAGC
Chr02	149.3	T000248976l	T000248976l_F	Chr02	45896048	45896070	T000248976l_R	Chr02	45896393	45896370	TGAGAGCTTACCACCAAAGATTC	AATATATGCCTATCCGAAGTGAGC
Chr02	153.4	s001508433-2	s001508433-2_F	Chr02	46144818	46144842	s001508433-2_R	Chr02	46145011	46144989	CGGGTATGTTGTTCATATGGATACT	GTTTCTTCCTCCTACGACCCTTA
Chr02	155.6	T000249764m	T000249764m_F	Chr02	46683655	46683677	T000249764m_R	Chr02	46683973	46683951	ATAAAGCCCAACAATTTGGAGAG	CATAATGCCAATCCAAAGTCCTA
Chr02	158.9	GMES2618	GMES2618_F	Chr02	47279826	47279849	GMES2618_R	Chr02	47279934	47279915	TCCTCAGTTCTGTTCTATTTTTCG	CAAATGTTGGTGGAGACACG
Chr02	159.7	C02-BARC-030511-06893	C02-BARC-030511-06893_F	Chr02	47361597	47361578	C02-BARC-030511-06893_R	Chr02	47361509	47361527	GCTACAGGTACCTAATCCAC	GACAAAGATGTAAAGTCTC
Chr02	161.3	T000250781m	T000250781m_F	Chr02	47699747	47699769	T000250781m_R	Chr02	47700010	47699988	GCTTCTCACCTTCGTTACACCTA	AACTGTCTTCATCTTCCCTCTCC
Chr02	161.3	GMES3942	GMES3942_F	Chr02	47710045	47710026	GMES3942_R	Chr02	47709757	47709776	CGGGTGCTGTATATGGGTTT	AGCTTCTGGGTTTTCAGCAA
Chr02	161.6	T000250903l	T000250903l_F	Chr02	47821550	47821573	T000250903l_R	Chr02	47821909	47821887	CCCTACTAGAGCTTCTTTCTGCAT	ATGGTCAAAGGATAACCAGGAAT
Chr02	162.5	T000251080s	T000251080s_F	Chr02	47999319	47999341	T000251080s_R	Chr02	47999516	47999494	CAACAGCTTGTTCAGAGTGTGAC	TGGCAATAGTTGATGAGTAGCAA
Chr02	162.6	T000251200l	T000251200l_F	Chr02	48118931	48118953	T000251200l_R	Chr02	48119278	48119256	TTAAGAAGAAGAAAGGACGGTGG	TTCTTCTATTGCGTTGAGAATCG
Chr02	162.9	C02-BARC-039653-07533	C02-BARC-039653-07533_F	Chr02	48152829	48152810	C02-BARC-039653-07533_R	Chr02	48152746	48152765	GATGCTGGCATTTCTCGAAG	ACGGGAAGGAAGACTACAAC
Chr02	165.6	Satg001	Satg001_F	Chr02	48354075	48354092	Satg001_R				GCACCTCGTATTCTACCT	TACGCCAAGCTTGTCCAG
Chr02	165.6	T000251579l	T000251579l_F	Chr02	48497260	48497285	T000251579l_R	Chr02	48497670	48497644	TTTATGTTATCTCCTTGTAAGAGTTT	TGTGATAACTACAAATCATACTTAATG
Chr03	0	GMES1173	GMES1173_F	Chr03	202756	202775	GMES1173_R	Chr03	202967	202948	TATGGGACATCAAAGCCACA	CGCACTGCCATATGAAGAGA
Chr03	0.5	Sct_195	Sct_195_F	Chr03	323438	323457	Sct_195_R	Chr03	323583	323564	CTATGCAAGGTCTAACTACA	AAACCGTCACACAGTCTCTG
Chr03	3	C03-BARC-044643-08744	C03-BARC-044643-08744_F	Chr03	459434	459452	C03-BARC-044643-08744_R	Chr03	459514	459494	CAAATTAGTCTCTCAATGC	CAAGTAGTTCTTAAAGTATTG
Chr03	3	Sat_379	Sat_379_F	Chr03	461803	461823	Sat_379_R	Chr03	462042	462020	TTTTGGCTCATCTTTCTTTTA	GCCCTAAGCACAACTGAACCTAT
Chr03	5.1	T000300555l	T000300555l_F	Chr03	553673	553695	T000300555l_R	Chr03	554028	554006	GCAATGCTTCAACTTAGGAGTTC	CGATGACGTGATACGTACCTCAC
Chr03	7.9	s029800007	s029800007_F	Chr03	745904	745929	s029800007_R	Chr03	746183	746161	CGGTCTAGTTTAGAGGTAGTTTCAGG	AGGGTGTGCCTAAAGACTGTGTA
Chr03	9.2	T000300796s	T000300796s_F	Chr03	803183	803205	T000300796s_R	Chr03	803382	803360	GCCATGGCACTAGTTAATGATAA	CGAGTATCGCCGTTGTTAATAGT
Chr03	10	T000300832s	T000300832s_F	Chr03	839582	839605	T000300832s_R	Chr03	839749	839727	CATCATATGAGCGCATCACTTATT	AAGATAAGGTGTAGCTTGACAAA
Chr03	10	T000300840l	T000300840l_F	Chr03	847525	847548	T000300840l_R	Chr03	847862	847841	TGATTGTTTGAAATTCTGATCATT	TGTCACAATCTGCAACTCATAAT
Chr03	12.7	T000301226l	T000301226l_F	Chr03	1241718	1241740	T000301226l_R	Chr03	1242059	1242037	GAAGCTGCATCCCTCATAAAGTA	TGACTGTGTGACGAACGAAATAC
Chr03	12.7	T000301272m	T000301272m_F	Chr03	1293415	1293437	T000301272m_R	Chr03	1293624	1293598	TGATATGGGATCAACATGTGTCT	TCTAGGTCAACGTCATTAGTTTGATAA
Chr03	13.8	GMES0925	GMES0925_F	Chr03	1332982	1333001	GMES0925_R	Chr03	1333271	1333252	TGCCAAACGCAACAAATAAA	TGGTTGCATTCCAAATTTCC
Chr03	16	T000301502s	T000301502s_F	Chr03	1523873	1523895	T000301502s_R	Chr03	1524080	1524059	TTTGTGAAATACAAGCGGAACTC	AGAATCACGGAACTAATCGGAA
Chr03	19	GMES6380	GMES6380_F	Chr03	1780800	1780819	GMES6380_R	scaffold_585	5919	5938	TCCTGAGTTCTCCACCAACC	TGAAAGGGTGATGATGACGA
Chr03	20.6	C03-BARC-042969-08483	C03-BARC-042969-08483_F	Chr03	2009155	2009174	C03-BARC-042969-08483_R	Chr03	2009236	2009217	GAGCTTGTTGTGGATGTATG	CTTAAAACTATTAGTGCTTG
Chr03	22.4	GMES3247	GMES3247_F	Chr03	2493838	2493857	GMES3247_R	Chr03	2494049	2494029	GGCGCACTCTCTATCCTCAA	CAGCATCTACCTAATCAGCCG
Chr03	23.1	C03-BARC-027728-06652	C03-BARC-027728-06652_F	Chr03	2770164	2770146	C03-BARC-027728-06652_R	Chr03	2770076	2770094	ACCAAACAGAAAGTTAGAC	CTTTGATGTGTTCCTTTAG
Chr03	23.9	T000302895l	T000302895l_F	Chr03	2923168	2923188	T000302895l_R	Chr03	2923520	2923498	AAACATTAGCAAGCGACCAAA	GATGATTGTGACCGTATGATGTG
Chr03	28.9	Satt152	Satt152_F	Chr03	3366475	3366493	Satt152_R	Chr03	3366722	3366698	CTATTCCTATCACAACACA	TAGGGTTGTCACTGTTTTGTTCTTA
Chr03	31.5	s026000076	s026000076_F	Chr03	3934182	3934160	s026000076_R				TTATATTTGATGCGACAATGGAA	CTAGGAGGACATGACTCGTGTTG
Chr03	32.1	C03-BARC-014709-01626	C03-BARC-014709-01626_F	Chr03	3985869	3985850	C03-BARC-014709-01626_R	Chr03	3985791	3985810	CACTGCATTTTCATATCCCC	GTACTTGAGATTTTCCTTCC
Chr03	32.8	T000304497m	T000304497m_F	Chr03	4304900	4304927	T000304497m_R	Chr03	4305136	4305114	TCATTGATGACAGTGATACTAATAGAGC	GTAAGAGCGTAGGGACCCATTAC
Chr03	37.3	T000305242m	T000305242m_F	Chr03	5143914	5143935	T000305242m_R	Chr03	5144202	5144184	GGTTACTCAAATTCGTTTACCA	AAGTATATCTCTCTTTGAGTTCGATT
Chr03	40.1	Satt530	Satt530_F	Chr03	5669546	5669525	Satt530_R	Chr03	5669335	5669354	CATGCATATTGACTTCATTATT	CCAAGCGGGTGAAGAGGTTTTT
Chr03	40.6	C03-BARC-045053-08869	C03-BARC-045053-08869_F	Chr03	6539973	6539954	C03-BARC-045053-08869_R	Chr03	6539894	6539913	ACTACTACTACCATTCTACC	AAGTGTTCCTCTCCTAGGTG
Chr03	40.9	Satt675	Satt675_F	Chr03	6771370	6771343	Satt675_R	Chr03	6771239	6771266	CTATTTCCGTCCTATTATCATTTTCGTC	TCTAACACGTATTTATTATTGGTCAATT
Chr03	42	s034100005	s034100005_F	Chr03	7870305	7870327	s034100005_R	Chr03	7870668	7870646	CCTAGTGATCTGGTCTTCAATGG	TGGAGGTTGGAGTAATGTTATGG
Chr03	42.2	Satt683	Satt683_F	Chr03	8686351	8686372	Satt683_R	Chr03	8686537	8686516	GGTGTGGGTCCTCAATTAAATA	GTTTTCCCTAAACTAACCTAAC
Chr03	42.8	s030300013-3	s030300013-3_F	scaffold_41	38459	38481	s030300013-3_R	scaffold_41	38792	38771	TTGGTAAAGGAGAATTGAGCGTA	GCCGAGCTCTGATACCAACTAA
Chr03	42.8	s030300013-2	s030300013-2_F	scaffold_41	38459	38481	s030300013-2_R	scaffold_41	38792	38771	TTGGTAAAGGAGAATTGAGCGTA	GCCGAGCTCTGATACCAACTAA
Chr03	42.8	s030300002-2	s030300002-2_F	scaffold_41	27128	27150	s030300002-2_R	scaffold_41	27237	27216	TCCACACCAACATACTTGAATTT	TGTTCCACATTAATTTCCTCCC
Chr03	44.4	GMES3814	GMES3814_F	Chr03	17786064	17786083	GMES3814_R	Chr03	17786257	17786238	CAGCAAGCCTTCCGATAAAC	CAACAAAATCCCAAGGGAAA
Chr03	48.2	GMES0610	GMES0610_F	Chr03	26332301	26332320	GMES0610_R	Chr03	26332441	26332421	GGGTGATGATGGAGGAGAGA	TCGTCATTCTTCTTCCCAATG
Chr03	48.5	C03-BARC-013579-01164	C03-BARC-013579-01164_F	Chr03	28993375	28993394	C03-BARC-013579-01164_R	Chr03	28993467	28993447	GAAAAGTTCCACAACAGTGC	CACAGCTTCAATAAAACCACC
Chr03	48.5	s011400371r	s011400371r_F	Chr03	29003521	29003494	s011400371r_R	Chr03	29003302	29003326	TGAGTGATATGAATGCTACTCTCTAATG	TCTCCTATACGTACTGAAGAGACAT
Chr03	48.5	C03-BARC-022187-04294	C03-BARC-022187-04294_F	Chr03	29582519	29582500	C03-BARC-022187-04294_R	Chr03	29582452	29582471	TCTATGGTAAGGGAACATGG	GGAATATCATCTTTCTCACC
Chr03	51.2	GMES1856	GMES1856_F	Chr03	32635269	32635250	GMES1856_R	Chr03	32634975	32634994	CCCTTCCTTTTTCTGGTTCC	AGGGTAGAAATGCACCATGC
Chr03	51.7	GMES6159	GMES6159_F	Chr03	32735414	32735395	GMES6159_R	Chr03	32735190	32735209	ATAGCAGAAAACCGTGCTGC	ACCTCCAACCAAGTTCAGGA
Chr03	52.6	Sat_033	Sat_033_F	Chr03	32838458	32838479	Sat_033_R	Chr03	32838629	32838608	GCAGATATTTAATCCCCTCACC	ATCTCGGAGAGAAAGAAATCGC
Chr03	52.8	C03-BARC-015309-02277	C03-BARC-015309-02277_F	Chr03	32938744	32938763	C03-BARC-015309-02277_R	Chr03	32938836	32938817	TACCAGGCATGGCAAAAACC	TGCCAACTTTTAGGGTGTCG
Chr03	53.2	GMES1738	GMES1738_F	Chr03	32940416	32940397	GMES1738_R	Chr03	32940194	32940213	CTCAAGCAGCAACAACCAAA	ATATCGGGATGTCGTCTTCG
Chr03	54.4	Satt080	Satt080_F	Chr03	33419564	33419543	Satt080_R	Chr03	33419412	33419433	CCATAAAATAATAAAGGTCAAT	TAATCAGTGGAAAAAAAGTTAT
Chr03	57.7	T000335805s	T000335805s_F	Chr03	33775202	33775226	T000335805s_R	Chr03	33775377	33775355	GAAATCAAGTTAAACACAATTCTCG	TAGAGATGAGGGAAAGGGTTAGC
Chr03	58.2	Sat_266	Sat_266_F	Chr03	34017521	34017544	Sat_266_R	Chr03	34017735	34017711	CTCCCACTAAAGAAATATTTTGGA	GCCATTTGTTTCAAACTTTGAGGTA
Chr03	60	Satt137-2_re	Satt137-2_re_F	scaffold_109	26782	26765	Satt137-2_re_R	Chr03	35138246	35138224	GGCCACAATGCACCTCTCTT	ATCATTGGAATGGATTATCAAGC
Chr03	61.8	T000336255m	T000336255m_F	Chr03	34232614	34232636	T000336255m_R	Chr03	34232884	34232862	TTCCTTCTATCCTCGGTAAGGTC	TTCAGTCAGTCACTTCAGTCGAA
Chr03	64	T000336692m	T000336692m_F	Chr03	34669980	34670002	T000336692m_R	Chr03	34670301	34670279	GGTTCCCGGTAGCTTAGAAGTAA	CTTGTTGATTCGGTGGTAGACTC
Chr03	64.5	T000337093s	T000337093s_F				T000337093s_R				CCAAGCTGCAATGAGAGAAA	CCAGGAAACTGGATTATGATTCT
Chr03	65.6	T000337264l	T000337264l_F	Chr03	35237108	35237130	T000337264l_R	Chr03	35237587	35237565	TTTGTCACCTACCTAACAAGCTG	GATCGTGATACTAATTGTGACAT
Chr03	68.9	Sat_236	Sat_236_F	Chr03	35596280	35596256	Sat_236_R	Chr03	35596063	35596090	GGTGCCTATGGTTCTACGTAGTTAC	TTTGGATTAGATCAATAAAAATCACATT
Chr03	71.4	C03-BARC-021465-04110	C03-BARC-021465-04110_F	Chr03	35802084	35802065	C03-BARC-021465-04110_R	Chr03	35801985	35802004	AGGGATACATTGAGGCACAC	CCCCTGTGGTGAAGGTATTT
Chr03	72.7	T000338004l	T000338004l_F	Chr03	35977425	35977447	T000338004l_R	Chr03	35977766	35977744	CAAGGTGCATACATACGACAAAG	ATGTTGTTAATGTGCTTCCATCC
Chr03	73	C03-BARC-013321-00482	C03-BARC-013321-00482_F	Chr03	35991083	35991064	C03-BARC-013321-00482_R	Chr03	35990996	35991015	ATTGGCACCAAAACTTGCGG	TGATCATCATGCCATGGGAC
Chr03	74.2	T000338134l	T000338134l_F	Chr03	36107444	36107466	T000338134l_R	Chr03	36107796	36107774	CCTTTGCTCAGTCCATGATTAAC	TCACTTTATGCAAGGAAGGAAAC
Chr03	75.6	C03-BARC-040277-07706	C03-BARC-040277-07706_F	Chr03	36369321	36369302	C03-BARC-040277-07706_R	Chr03	36369247	36369266	GAAGACCGAGATTGGATCTG	AAGGCAACCAACTACATACG
Chr03	75.9	GMES1399	GMES1399_F				GMES1399_R	Chr03	36399367	36399349	TTCTTGCCAAACAATGACCA	GGGATACAAAAGTGGGGGAG
Chr03	76.7	GMES4060	GMES4060_F	Chr03	36456701	36456720	GMES4060_R	Chr03	36456824	36456805	CATTACAAGCTCGACGCAAA	ACACCAGCCAGTGGAAAAAC
Chr03	76.7	GMES2817	GMES2817_F	Chr03	36492205	36492226	GMES2817_R	Chr03	36492435	36492416	TCCTATTCCACCTCACATTCCT	GCAACTGTGGAATGGAACCT
Chr03	81	T000338936m	T000338936m_F	Chr03	36918272	36918294	T000338936m_R	Chr03	36918605	36918580	CATTTGGTGTGGATGATTACTGA	AAATTACTTTATACACCACGATCTTT
Chr03	86.9	Satt549	Satt549_F	Chr03	37343230	37343209	Satt549_R	Chr03	37342993	37343011	GCAAAACTTTGGAGTATTGCAA	CGCAACAATCACTAGTACG
Chr03	89.1	C03-BARC-042245-08221	C03-BARC-042245-08221_F	Chr03	37461164	37461183	C03-BARC-042245-08221_R	Chr03	37461257	37461238	TAGGCACAACTGCTTTGTAG	AGTGGTGTGTTCAAATTCTG
Chr03	92.1	GMES1100	GMES1100_F	Chr03	37940052	37940071	GMES1100_R	Chr03	37940205	37940186	ATAAGCGTTCCATGGTGGAG	ATGCTTTCACTTGTGAGCCA
Chr03	94.8	T000340442s	T000340442s_F	Chr03	38427655	38427680	T000340442s_R	Chr03	38427858	38427836	TTGAAATGACTATACTGAGTGCTTCC	ATTAAGTGGAACCAAGTGACCAA
Chr03	98.5	C03-BARC-020101-04446	C03-BARC-020101-04446_F	Chr03	39135423	39135442	C03-BARC-020101-04446_R	Chr03	39135504	39135485	ATAAAACACGGCAGGAGCAC	CTCCTCCTTCCACGTTTTTC
Chr03	98.5	T000341165l	T000341165l_F	Chr03	39152857	39152879	T000341165l_R	Chr03	39153231	39153206	AGGCAAAGTTAAGAATTGGATCG	TTTCAGAATTAGTGTGCTAAGAGTTT
Chr03	101.8	GMES4212	GMES4212_F	Chr03	39647601	39647582	GMES4212_R	Chr03	39647404	39647423	CATTGAAATTCCCGCAGACT	TTGTTCTGCGATTCGATGAG
Chr03	102.5	GMES4109	GMES4109_F	Chr03	39958172	39958191	GMES4109_R	Chr03	39958424	39958405	CAGCCGTGCTCTCTCTCTCT	GGGGAAACGAAGTTGACGTA
Chr03	104.4	Satt234	Satt234_F	Chr03	40168795	40168812	Satt234_R	Chr03	40169007	40168991	TGAGAGCAGGACATTTTT	TCTGCGAGTGTTTTCTG
Chr03	107.8	T000342500m	T000342500m_F	Chr03	40488152	40488169	T000342500m_R	Chr03	40488366	40488344	AAATGGTATTACGCGTGCATTT	CTGCGTAAATTGCTCGTACTAAA
Chr03	111.1	s006300677	s006300677_F	Chr03	40898557	40898536	s006300677_R	Chr03	40898448	40898469	CATGACAACGCTGTCTTTGAAC	CAAGCTCCATATTAGAGGCCAA
Chr03	112.2	s006300367	s006300367_F	Chr03	41209104	41209082	s006300367_R	Chr03	41208718	41208740	TTCAAGCCACATTTATCAGTGAA	AAGCTCCAATCATGTGCTGTACT
Chr03	114.4	s006300056	s006300056_F	Chr03	41520078	41520055	s006300056_R	Chr03	41519929	41519952	AATCTTTATTAAATGCGTGACTTT	TTAAAGATGAAACTTTAGGTTTGT
Chr03	116.8	T000343683s	T000343683s_F	Chr03	41679812	41679834	T000343683s_R	Chr03	41679982	41679960	AGTCGAAATCCTATGTTGGACCT	GGCCCATCAATATTACATTTCAG
Chr03	118.7	T000343872m	T000343872m_F	Chr03	41868325	41868349	T000343872m_R	Chr03	41868623	41868598	TCACATCATTTATTGTTGACGATTT	TGTTATAGTGATAATTACATGTCCTG
Chr03	120	GMES4701	GMES4701_F	Chr03	42091500	42091519	GMES4701_R	Chr03	42091741	42091722	GCCACGATACAAACAAAGCA	ACATCGATCAGGAAGGCATC
Chr03	121.7	GMES0685	GMES0685_F	Chr03	42409601	42409582	GMES0685_R	Chr03	42409163	42409185	ATCTCAGAAGCAGCAGGAGC	CAACATCGTAAGGAACATTAGGC
Chr03	123.3	Satt022	Satt022_F	Chr03	42676603	42676582	Satt022_R	Chr03	42676404	42676427	GGGGGATCTGATTGTATTTTACCT	CGGGTTTCAAAAAACCATCCTTAC
Chr03	124.2	Sat_125-2	Sat_125-2_F	Chr03	42764964	42764945	Sat_125-2_R	Chr03	42764829	42764844	TTCTTTGGGCTTTGACTTGG	TGGTCCAAAATCAACTACCG
Chr03	127.9	GMES2723	GMES2723_F	Chr03	43332523	43332504	GMES2723_R	Chr03	43332227	43332246	CAGCCCAATGCACTTCACTA	CGCAGCCTCAGATCTCTACC
Chr03	128.2	C03-BARC-018125-02530	C03-BARC-018125-02530_F	Chr03	43513304	43513323	C03-BARC-018125-02530_R	Chr03	43513387	43513368	ACTACTCCCACCAACTACAC	TCCCCACAATTTCGGGTATC
Chr03	131.6	GMES0491	GMES0491_F	Chr03	44247260	44247241	GMES0491_R	Chr03	44247100	44247125	GTCATCCCAAGAAACCTGGA	AAAGGTAAGAAAAACATAGGGAAAAA
Chr03	131.7	GMES1187	GMES1187_F	Chr03	44250944	44250925	GMES1187_R	Chr03	44250749	44250768	CGCGTCGAACAGAGATCATA	TGCCATCAATTCCTTCAACA
Chr03	132.3	GMES2806	GMES2806_F	Chr03	44282054	44282035	GMES2806_R	Chr03	44281784	44281803	GTTTCAGCCAACCCAACACT	AGCTTGATTTTGCGCTTGTT
Chr03	134.7	GMES1265	GMES1265_F	Chr03	44521958	44521977	GMES1265_R	Chr03	44522056	44522037	AAGTGGGAACACACGGAAAG	AAACAAAGCTAGGCCTGCAA
Chr03	135.5	s004200019	s004200019_F	Chr03	44648275	44648253	s004200019_R				TGTGATCACTTTGTAGCTTTCCA	AAAGGCCTAGGTGCTCTAGTTG
Chr03	135.7	T000346856l	T000346856l_F				T000346856l_R	Chr03	44855211	44855193	AAATAGAGGGATGGATGGAGAGT	AAAGGGAGAGGGCTAATTT
Chr03	139.8	T000347318m	T000347318m_F	Chr03	45315628	45315648	T000347318m_R	Chr03	45315940	45315916	TTGAAACTAAAGCCTATGAAGGG	TGCTTGACAAATCTATTTGAGAGTG
Chr03	140.5	s004106980-2.1	s004106980-2_F	Chr03	45743401	45743378	s004106980-2_R	Chr03	45743243	45743264	TCTTTGAAGAAGATAAATCAACATGG	TTGAACGGTTTAACAAGCTGTAAC
Chr03	141.8	T000347670l	T000347670l_F	Chr03	45668267	45668289	T000347670l_R	Chr03	45668611	45668589	TTTCTCTCTAACACTGCTCAAAT	AGATTGCTCTACTGCATCATTGG
Chr04	0	GMES0624	GMES0624_F	Chr04	128234	128253	GMES0624_R	Chr04	128535	128516	GATCTCAAGGCCCAGTCAAA	CAGATGCACAAATCGGAGAC
Chr04	0.8	GMES0489	GMES0489_F	Chr04	317800	317781	GMES0489_R	Chr04	317439	317458	TGGATCTCCTCCTTTCCCTT	AGCTCGGCAGGAGTTAACAA
Chr04	1.1	C04-BARC-031911-07224	C04-BARC-031911-07224_F	Chr04	443249	443230	C04-BARC-031911-07224_R	Chr04	443176	443195	CCTCCCTCTCATTCATAGAC	GCAAAAACGCTAGAAAACGC
Chr04	1.1	Satt565	Satt565_F	Chr04	549826	549848	Satt565_R	Chr04	549981	549959	CCCGGAACTTGTAATAACCTAAT	CTCTCTTATGATGTTCATAATAA
Chr04	2.7	GMES0858	GMES0858_F	Chr04	1109047	1109066	GMES0858_R	Chr04	1109261	1109242	GTGCTAAATTCATGGCCACC	CGAGAACCACCGAGAGTAGC
Chr04	3	C04-BARC-031853-07222	C04-BARC-031853-07222_F	Chr04	1202354	1202336	C04-BARC-031853-07222_R	Chr04	1202262	1202280	CCTCTCATAATATTAGGAC	GTATCTTAAGAGTTAAGAC
Chr04	4.3	s023700293	s023700293_F	Chr04	1595581	1595559	s023700293_R	Chr04	1595290	1595312	AAATGTGCGTTTATTGAGATGCT	CTGCAAGTTATTTCAGTGCTTCC
Chr04	5.4	C04-BARC-016959-02166	C04-BARC-016959-02166_F	Chr04	1757966	1757947	C04-BARC-016959-02166_R	Chr04	1757886	1757905	GGAGAGTACGCTGTTTCATC	AAACTTCACCGGCAAAGCAG
Chr04	5.9	C04-BARC-025861-05129	C04-BARC-025861-05129_F	Chr04	1947795	1947775	C04-BARC-025861-05129_R	Chr04	1947707	1947726	CATCAAGTTCCCAATTAGTTC	AGTTTACGCATGGTGTGCTC
Chr04	6.7	T000402078s	T000402078s_F	Chr04	2133501	2133524	T000402078s_R	Chr04	2133699	2133677	TTGACTGTTACTTAAAGTTTCCAA	ATACGAGTAAGGCTAGGCAGGTT
Chr04	8.9	C04-BARC-019133-03313	C04-BARC-019133-03313_F	Chr04	2753256	2753237	C04-BARC-019133-03313_R	Chr04	2753157	2753176	CATGACAATCCTCGTACAGC	CGACGCAATAGCCTTTTTGG
Chr04	9.2	Satt396	Satt396_F	Chr04	2776344	2776364	Satt396_R	Chr04	2776520	2776503	AAAAGGGATAAGTTTAAAAAT	GGCCTGTAAAGGGATTCC
Chr04	11.4	GMES0757	GMES0757_F	Chr04	3282281	3282262	GMES0757_R	Chr04	3282037	3282056	TCCTCTCAACACCTTTGCCT	TCGCTCTTCCTCGTAATCGT
Chr04	12.4	C04-BARC-015529-01991	C04-BARC-015529-01991_F	Chr04	3425064	3425045	C04-BARC-015529-01991_R	Chr04	3424971	3424990	TTGTCCGTTACCCACATCAC	AAATGGTGACTGGAAGGAGC
Chr04	13.8	T000403565l	T000403565l_F	Chr04	3618980	3619004	T000403565l_R	Chr04	3619359	3619337	TGTTTAGAATAATACACTTCAGGGC	ATACATATACATGATTGGCGGCT
Chr04	15.7	s034200001	s034200001_F	Chr04	3926981	3926959	s034200001_R				CAAGGCAGAACTACCTTATTGCT	ATGCCAGAATGCCCAACTT
Chr04	17	GMES6334	GMES6334_F	Chr04	4168350	4168331	GMES6334_R	Chr04	4168121	4168140	TCAAGATGAAGGGGATTTCG	CGGTGTTGCAGAGGTAGACA
Chr04	18.3	C04-BARC-044273-08655	C04-BARC-044273-08655_F	Chr04	4217220	4217239	C04-BARC-044273-08655_R	Chr04	4217312	4217293	TTCAATGGGGTGTGATCGAC	TACAACCTCCCTCAACACTG
Chr04	18.5	Sat_337	Sat_337_F	Chr04	4221001	4220975	Sat_337_R	Chr04	4220742	4220769	CATGTTTTACAAATTTTGAAGCCTTAG	ATCAATCCATTTATGAGGTTAGTTTCTT
Chr04	18.6	T000404245l	T000404245l_F	Chr04	4292435	4292455	T000404245l_R	Chr04	4292814	4292792	ACGTGCTGCACTTTATTCCAA	TTTGTTTGGATATTTGTATCTGA
Chr04	22.5	T000404556l	T000404556l_F	Chr04	4603704	4603726	T000404556l_R	Chr04	4604120	4604098	AACAAGTTCAAAGGCAGTGCATA	CGTCTTCCATTATGGGTAAGTCA
Chr04	23	T000404649l	T000404649l_F	Chr04	4701565	4701588	T000404649l_R	Chr04	4701920	4701898	AAATTGTGCTCAACTTAAACACCT	AATTACTCCGAATGAACCCTTTC
Chr04	23	T000404663l	T000404663l_F	Chr04	4715490	4715513	T000404663l_R	Chr04	4715870	4715848	AACGTTGGTCCTACTATTCAAGTT	TTCTATATTGCTTCCACTGATTT
Chr04	26.9	s009300334-2	s009300334-2_F	Chr04	4874616	4874594	s009300334-2_R	Chr04	4874456	4874478	AATTTATGCAATGTTGGAGCACT	TGTCTGAGTTCCTCTTTACTGGG
Chr04	31.3	Sat_140	Sat_140_F	Chr04	5285911	5285888	Sat_140_R	Chr04	5285713	5285736	CCATGAAATTATTTGGCAAGTATT	GTTGAAGAATGGAAACTAAAAATG
Chr04	33.8	s019500613-2	s019500613-2_F	Chr04	5615379	5615359	s019500613-2_R	Chr04	5615013	5615035	CCGGTCAACCAATTTACCATT	CCACAGAACCAGGCACATTAGTA
Chr04	36.2	s019500336-2	s019500336-2_F	Chr04	5892249	5892227	s019500336-2_R	Chr04	5892064	5892086	ATACGAGCTCCAATGTTAAACGA	AGGTAATTAAATCCCTCCGACAG
Chr04	38.9	T000406042s	T000406042s_F	Chr04	6106115	6106137	T000406042s_R	Chr04	6106282	6106260	TTTCTAATCATGTCGAGCACTGT	AAATGTCAAGTATCTTCCCATAA
Chr04	41.9	T000406355l	T000406355l_F	Chr04	6428363	6428385	T000406355l_R	Chr04	6428714	6428692	GAGACGGAGAAGAAATTCTGGAT	AGTATTGTTCTCAACCAGCATGA
Chr04	44	C04-BARC-035457-07203	C04-BARC-035457-07203_F	Chr04	6628637	6628618	C04-BARC-035457-07203_R	Chr04	6628552	6628571	TGTCTAGCGATTAGTGCAGG	GCTGCTTCTAAATTCTAATC
Chr04	44.3	s025600001	s025600001_F				s025600001_R	Chr04	6675468	6675489	TTTCTTATTCATATTCTGTATGGGTC	AATTGCTGCAAAGCTCCTTTAG
Chr04	44.9	138ct25	138ct25_F	Chr04	6687210	6687193	138ct25_R				TAAGAGGGTCTTATCCAC	CTCGGTATTGACCATATC
Chr04	45.9	C04-BARC-025825-05110	C04-BARC-025825-05110_F	Chr04	6757416	6757398	C04-BARC-025825-05110_R	Chr04	6757321	6757340	CCTCTCACCTTTTCATATA	CCCACCTCAGGTGAGTTTTA
Chr04	48.4	T000406924s	T000406924s_F	Chr04	6998768	6998790	T000406924s_R	Chr04	6998927	6998905	AGTGGCCAATACTCCTCAATATG	CAGTTCATCGCTATTACAGCAAC
Chr04	52.8	GMES6071	GMES6071_F	Chr04	7532473	7532454	GMES6071_R	Chr04	7532366	7532385	CTCCCCTTAGACAACACCGA	ATACTCTCTCGCCTCACCGA
Chr04	56.9	GMES2745	GMES2745_F	Chr04	8147631	8147614	GMES2745_R	Chr04	8147426	8147445	GCGGAGGGCAACATACAC	GTGACAGACAGCGTTGGAGA
Chr04	57.5	C04-BARC-040731-07827	C04-BARC-040731-07827_F	Chr04	8630647	8630666	C04-BARC-040731-07827_R	Chr04	8630724	8630706	GACTTAGGAGTGGACTCTAC	TAGCGCAAAAGAACAAAAG
Chr04	59.6	T000409029l	T000409029l_F	Chr04	9103112	9103138	T000409029l_R	Chr04	9103503	9103477	GGATAGATATTAATGTTGTATTGAACT	TGTAGAAATTGTGTTTATTTACCCTTT
Chr04	61.5	T000409190s	T000409190s_F	Chr04	9264431	9264452	T000409190s_R	Chr04	9264632	9264610	GACAACCAAATGCCCAAATATC	CCAATTCCTTTAGGTGCTTGTAA
Chr04	64.5	T000409896s	T000409896s_F	Chr04	9966286	9966308	T000409896s_R	Chr04	9966506	9966484	CACAAAGCATTACCTGTCTCAAA	TACATATAGGCTGCACAACGAAA
Chr04	64.5	T000410781s	T000410781s_F	Chr04	10956350	10956372	T000410781s_R	Chr04	10956553	10956528	CTTCTTCCAACATCAATCTCTCC	CACAGTAAATTTATTATTCGTGATGA
Chr04	65.3	T000411607s	T000411607s_F	Chr04	12654313	12654337	T000411607s_R	Chr04	12654480	12654455	CCTTGTTTAAGGACTACATACCTTT	AAACTTCATCTAAAGTGTTATACGGA
Chr04	65.3	T000411967m	T000411967m_F	Chr04	12993192	12993215	T000411967m_R	Chr04	12993529	12993507	GAGAAATTATACAAATTCCTCCTT	GAGAGGTGAGAGATTAGTTTGGG
Chr04	65.3	T000413356s	T000413356s_F	Chr04	14375738	14375760	T000413356s_R	Chr04	14375844	14375822	TCCTTCAAAGGCCTAGAAATAGT	GCTAACTCATGATGGCTAAGTGG
Chr04	65.3	T000414734m	T000414734m_F	Chr04	15759846	15759868	T000414734m_R				CACTGCACACAGATACACCATCT	TTATCATGAACCCTCATGAATCC
Chr04	65.9	Satt190	Satt190_F	Chr04	16737067	16737048	Satt190_R	Chr04	16736887	16736905	GGGAGTGTGAACTTACATTGTCT	GGGCCTTGAATTTTGTGCTAT
Chr04	66.9	GMES6375	GMES6375_F	Chr04	19192278	19192292	GMES6375_R	Chr04	19192371	19192352	ACCAGCAGCGATAAGCAAAA	CCAATCGTCCCACACTTCTT
Chr04	67.2	GMES0002	GMES0002_F	Chr04	21671915	21671896	GMES0002_R	Chr04	21671643	21671662	TAGGTGACCATGGAGCATCA	CCCCGAAAGAAAGACAGAAA
Chr04	67.2	T000430002s	T000430002s_F	Chr04	24469636	24469614	T000430002s_R	Chr04	24469449	24469471	ACCCTAAGAACTCGTGACTTTCC	TGCGTAGAAGCTCACTACTCAAA
Chr04	68.8	T000428065s	T000428065s_F	Chr04	36523465	36523488	T000428065s_R	Chr04	36523641	36523619	TGATTTAAATACATTCCACTCACA	TGCTTTAGATGTGAACAAGAACA
Chr04	68.8	T000426917s	T000426917s_F	Chr04	35399280	35399302	T000426917s_R	Chr04	35399484	35399462	CGCCTTGTCATTAGATATCACCA	TCATGTATTCGGTTAAGTTTGGG
Chr04	68.8	Sat_357	Sat_357_F	Chr04	33967556	33967536	Sat_357_R	Chr04	33967283	33967303	AGGGTTTAAGGTGTAGGTTGT	CACCGCTTTTGTTTCTTTTTG
Chr04	70.4	GMES0628	GMES0628_F	Chr04	42387308	42387289	GMES0628_R	Chr04	42387131	42387150	TGTGTGCCCCTGCTACAATA	GTAGGTGCTGCCCAAAACAT
Chr04	70.4	GMES0782	GMES0782_F	Chr04	42387131	42387150	GMES0782_R	Chr04	42387308	42387289	GTAGGTGCTGCCCAAAACAT	TGTGTGCCCCTGCTACAATA
Chr04	71.2	Satt294	Satt294_F	Chr04	43302112	43302132	Satt294_R	Chr04	43302362	43302340	GGTCAAATGCAAATTATTTTT	CTCAGTGTGAAAGTTGTTTCTAT
Chr04	73.4	Sat_042	Sat_042_F	Chr04	44367916	44367890	Sat_042_R	Chr04	44367680	44367706	CCACGTATTAGGGAATGATATGAAATT	AACGGATACAAGTAAACTTGAATTTTA
Chr04	74.9	T000441843l	T000441843l_F	Chr04	44986140	44986162	T000441843l_R	Chr04	44986497	44986479	GAAACATAACATTTCCCATCCAA	CAGAGGCTCGATAGTGTAACTGG
Chr04	79.4	GMES0664	GMES0664_F	Chr04	45660600	45660619	GMES0664_R	Chr04	45660842	45660823	GAAATGACAATAATGCCGGG	CCCTACCTCCCTCCCTTGTA
Chr04	82.6	T000442866m	T000442866m_F	Chr04	46007013	46007035	T000442866m_R	Chr04	46007350	46007328	ACACCCGTCCTATACTCGTACCT	TCTTGTTCCTGTTCTCACTCTCC
Chr04	83.5	T000442938s	T000442938s_F	Chr04	46079125	46079147	T000442938s_R	Chr04	46079299	46079277	AGGCTAAATTTGGAGCCAATAAG	AACACCGCTTAGATAGCTTCTCC
Chr04	89.1	s004700076-2	s004700076-2_F	Chr04	46689369	46689347	s004700076-2_R	Chr04	46689178	46689200	AAATCGGTCCTGATTCTAAAGGT	CTCCATGGTATGAATTCTTGAGG
Chr04	92.2	GMES1044	GMES1044_F	Chr04	46930327	46930346	GMES1044_R	Chr04	46930805	46930786	GGAGAATAGCACCAATGGGA	ATTTGCAATCGGTGACAACA
Chr04	93	GMES1013	GMES1013_F	Chr04	47000018	47000033	GMES1013_R	Chr04	47000340	47000321	TTTGTCCGATATCCTCAGGC	CCACATGCCCCTAATTTCTG
Chr04	93.3	Sat_235	Sat_235_F	scaffold_21	3141999	3141985	Sat_235_R	Chr04	47074634	47074655	TTGGGATGGGTGTAAAACATT	GAAGGCAAGTCAAGTTGATGAG
Chr04	93.3	GMES0708	GMES0708_F	Chr04	47085344	47085325	GMES0708_R	Chr04	47084885	47084904	CCTTCAGACAAGGGACGAAA	CCAAAGCATTGCACTGAAGA
Chr04	93.3	C04-BARC-040387-07722	C04-BARC-040387-07722_F	Chr04	47156953	47156972	C04-BARC-040387-07722_R	Chr04	47157046	47157027	CCTCAACGTCATTCAGATTC	TCCTAAGCTATTAGTGCAAG
Chr04	93.8	Sct_191	Sct_191_F	Chr04	47305560	47305578	Sct_191_R	Chr04	47305683	47305663	TGAAATGCTTGAGAAGTAA	GCGCAGTTGAAACTATAACAC
Chr04	94.8	s006504377-2	s006504377-2_F	Chr04	47391437	47391414	s006504377-2_R	Chr04	47391288	47391313	GCCTAATCTGAGCTAGGTAGGAAA	AAGATCTTGATGAGAAATTGTTTGAA
Chr04	97.9	s006504009-2	s006504009-2_F	Chr04	47764166	47764146	s006504009-2_R	Chr04	47763976	47763998	AAATCTGTTGTCACACTTGGCTT	TCTGATTCTCTCGTTCCTTTCAA
Chr04	99.5	T000444782l	T000444782l_F	Chr04	47907583	47907605	T000444782l_R	Chr04	47907913	47907891	TGAAGGGAACAATGATTATGTCA	TATTATGACGATAGTCGCAGGGT
Chr04	100	T000444806l	T000444806l_F	Chr04	47931636	47931658	T000444806l_R	Chr04	47931991	47931969	GATCAGGTTAATCGTTTGACAAT	CAAATCTCCAATTGTTGATCCTT
Chr04	102.8	s006503597	s006503597_F	Chr04	48176564	48176542	s006503597_R	Chr04	48176228	48176250	AACGCTGGTAAAGGACTAAAGGT	GCAACACTATATTGTGCAGACCA
Chr04	103.9	s006503310-2	s006503310-2_F	Chr04	48463527	48463505	s006503310-2_R	Chr04	48463418	48463440	TTTCTTACCTTCAACTTTCCTTT	CATTTAGGCATGAGCAGACAGAC
Chr04	107.8	T000445584s	T000445584s_F	Chr04	48709831	48709855	T000445584s_R	Chr04	48710023	48710001	CCTTTATACCTTCAAGTCTCGATCA	ATGTTGCAGTTGTGGGAGTTAAA
Chr04	110.8	T000445723l	T000445723l_F	Chr04	48848283	48848305	T000445723l_R	Chr04	48848638	48848615	ATAGAGCATGTGGATTTGGAAGA	TCAATAACCTTCATATATACCCGA
Chr04	115	s006502610-2	s006502610-2_F	Chr04	49162849	49162827	s006502610-2_R	Chr04	49162690	49162713	TCATCTCATCCAATGCGTCTAAT	AAACCTTCTTTCATTGATACTGTT
Chr04	116.4	GMES1325	GMES1325_F	Chr04	49580658	49580639	GMES1325_R	Chr04	49580408	49580427	TGGAGATGGCATGGATATGA	AAAGCCTACTCAAATCCCCA
Chr04	117	GMES2627	GMES2627_F	Chr04	49739446	49739465	GMES2627_R	Chr04	49739685	49739666	GAAGAATACACCAACCGCGT	GCTGGTCTTGCTGTTGTTGA
Chr04	119.5	GMES1807	GMES1807_F	Chr04	50333224	50333205	GMES1807_R	Chr04	50332871	50332890	GTGCACCCTTCCACATTCTT	TTATTGACCATGTCCTCGCA
Chr04	121.6	Satt180	Satt180_F	Chr04	50427794	50427781	Satt180_R	Chr04	50427582	50427599	TCGCGTTTGTCAGC	TTGATTGAAACCCAACTA
Chr04	125.6	Satt164	Satt164_F	Chr04	50805530	50805508	Satt164_R	Chr04	50805300	50805327	CACCAATGGCTAAAGGTACATAT	AGGAGAAGAAAAAATCACATAAAATATC
Chr04	127.8	C04-BARC-028671-05985	C04-BARC-028671-05985_F	Chr04	51249456	51249475	C04-BARC-028671-05985_R	Chr04	51249535	51249516	CATCTCCGTCCAAGTCAAAC	GAACAAGGGAGAGAGCAAAG
Chr04	129.8	T000448538s	T000448538s_F	Chr04	51665820	51665842	T000448538s_R	Chr04	51666024	51666002	CGTATGACCTTATTGGAAGGGAT	ATTAATTGCTATTTGCCGAATCA
Chr04	132	C04-BARC-029125-06087	C04-BARC-029125-06087_F	Chr04	52316206	52316187	C04-BARC-029125-06087_R	Chr04	52316122	52316141	ATCTGCGGTATGCCTTTTTG	AATGAGGTACTAATCCCCCC
Chr04	132.1	s023100049	s023100049_F	Chr04	52330686	52330664	s023100049_R	Chr04	52330338	52330360	CTCAAACGCAACTTAGGGACTTA	AAATGGCCATATCAGACTCAAGA
Chr05	0	s003507308	s003507308_F	Chr05	83109	83086	s003507308_R	Chr05	82968	82990	TTGACGGAACAGAGCTACTACATT	ATTTGCTTCCGTAAATTCCTCTC
Chr05	0	GMES2497	GMES2497_F	Chr05	170822	170802	GMES2497_R	Chr05	170587	170606	TGAATTTCTTCGACACACACA	TTGCTAGCTCTTGTGGGGTT
Chr05	0.8	GMES5789	GMES5789_F	Chr05	497775	497756	GMES5789_R	Chr05	497545	497564	TGTGTTGTTGCATTGTCCCT	GCACGTCAGCTCAAATTCAA
Chr05	0.8	GMES5782	GMES5782_F	Chr05	497775	497756	GMES5782_R	Chr05	497490	497509	TGTGTTGTTGCATTGTCCCT	AGTCTGAGAAAGCAGGAGCG
Chr05	1.3	C05-BARC-029923-06753	C05-BARC-029923-06753_F	Chr05	590280	590299	C05-BARC-029923-06753_R	Chr05	590367	590348	GGAATTGAGGGCGATACAAA	GAGCAATTTCACTTAATGTC
Chr05	1.9	GMES0706	GMES0706_F	Chr05	1043794	1043775	GMES0706_R	Chr05	1043506	1043525	GTGTTTCCCTTGTGCCTGAT	GGCGCCGTAATTCACAGTAT
Chr05	3.8	GMES6481	GMES6481_F	Chr05	1452009	1452028	GMES6481_R	Chr05	1452208	1452189	AGTGCGTACCCTAGCAGGAA	ACGGAGCGAAAACAAGAAGA
Chr05	5.6	C05-BARC-028503-05925	C05-BARC-028503-05925_F	Chr05	1607588	1607569	C05-BARC-028503-05925_R	Chr05	1607491	1607511	ACTCAATCACCCCCCAAATT	CCAACGTTAGAAAAGAAAGAG
Chr05	8.1	s003505623	s003505623_F	Chr05	1766234	1766212	s003505623_R	Chr05	1765843	1765865	GAGAGTGCGATTTACTGTACGAA	GTTGTCAAGAATGGAAAGTGGTT
Chr05	9.7	s003505524-2	s003505524-2_F	Chr05	1865247	1865222	s003505524-2_R	Chr05	1865082	1865106	TTCCTTTACTAATTAGACCTTGTTGG	TTTAACAGAAGATACTGAGTCTGGG
Chr05	11.6	s003505358	s003505358_F	Chr05	2031595	2031572	s003505358_R	Chr05	2031214	2031236	GCATCAATGAGTTAAGTTGAAGCA	CCCGTATAATCAACAAATTGTGC
Chr05	13.2	GMES5019	GMES5019_F	Chr05	2208048	2208067	GMES5019_R	Chr05	2208153	2208134	AACCAAACAACGCCTACTCG	CAACGAGGGAGTGGAACATT
Chr05	14	C05-BARC-040651-07807	C05-BARC-040651-07807_F	Chr05	2295665	2295684	C05-BARC-040651-07807_R	Chr05	2295755	2295736	TCATAGAGGAAAGGGTGGTG	ATGCAGTCACCACTGTACTC
Chr05	16.8	Sat_137	Sat_137_F	Chr05	2670986	2671006	Sat_137_R	Chr05	2671248	2671228	GATGACGCCGCAGGTTTCTCC	GGTGCGGTTCCACAGTTTTTT
Chr05	18.5	s003504305	s003504305_F	Chr05	3121232	3121210	s003504305_R	Chr05	3121037	3121063	TTGGTGGATAAAGGTCAATTGTG	TTCCTTATATGGGTTATTAAGACCACT
Chr05	21.3	s003503982	s003503982_F	Chr05	3450562	3450540	s003503982_R	Chr05	3450416	3450437	TAGCCAACCTTATCGTTTGGTTC	TTTCATTCAAATGAGTAGCTTT
Chr05	24.8	T000501873l	T000501873l_F	Chr05	3595189	3595214	T000501873l_R	Chr05	3595551	3595526	AAGATGACAATCTATCTTTCAGAGAC	TTGAGTTTAATGAGCTTACAATGATG
Chr05	26.4	s003503672	s003503672_F	Chr05	3760214	3760192	s003503672_R	Chr05	3760098	3760121	AAATTGTTAGACGAAACACAAGT	GCTGAACTAAGTAAATGCGTTCTC
Chr05	30.9	T000502221m	T000502221m_F	Chr05	3942890	3942913	T000502221m_R				TGAAATAAAGAAGGGAGGATAGCA	AAATTTGTACACCCTGGTGTTTG
Chr05	32.7	s003503358	s003503358_F	Chr05	4074306	4074284	s003503358_R	Chr05	4073963	4073984	TTTCAAATAAATCAATCCCTTCA	GATCATTCTGGAGATGCAAGAG
Chr05	33.9	T000502439m	T000502439m_F	Chr05	4159635	4159657	T000502439m_R	Chr05	4159954	4159932	AAATGGAGCCAAACACAAATAGT	TAGCAACTACTTCTTGCGGATGT
Chr05	36.9	GMES4809	GMES4809_F	Chr05	4401138	4401157	GMES4809_R	Chr05	4401361	4401342	CCTCGTCCTCGTTTTCTCAG	TCTTTGGGCTAGGCAAATTC
Chr05	38	T000502682m	T000502682m_F	Chr05	4402329	4402351	T000502682m_R	Chr05	4402610	4402589	TGCTTATCTACCTCCCATTTGTT	CCTTAAAGGGTTACATCCCTGG
Chr05	38.3	T000502707s	T000502707s_F	Chr05	4421597	4421619	T000502707s_R	Chr05	4421799	4421777	TTTGGTTCTAAATTACTCCTGCG	AAGGGTTTCATGCAGACTTAACA
Chr05	38.6	GMES4350	GMES4350_F	Chr05	4421619	4421638	GMES4350_R	Chr05	4421739	4421718	GTTGGTTTCATGGTTCGTCC	TGAAATCCATATTGGCATGTTT
Chr05	38.8	T000502751m	T000502751m_F	Chr05	4465473	4465495	T000502751m_R	Chr05	4465761	4465740	AATGTACCAAGACCGAGACGATA	ACGTGTTTCTTTGCAAGACGTG
Chr05	39.1	T000502758m	T000502758m_F	Chr05	4472816	4472838	T000502758m_R	Chr05	4473088	4473065	AGTTACTTTGTCAGTGCCGTGAA	CAATTTCTCAATCGTTGAAAGTAA
Chr05	41.7	T000502901m	T000502901m_F	Chr05	4615301	4615325	T000502901m_R	Chr05	4615633	4615611	GAGTAGTTATTCTGATTTGGTTGGG	AGGAAATGTGGATAGGTGTCAGA
Chr05	42	T000502939m	T000502939m_F	Chr05	4653714	4653736	T000502939m_R	Chr05	4654040	4654011	ACGATACACTAGAAGCACGGTGT	TGAAGTGAATGTGAATATTAAATCTATGTG
Chr05	43.9	T000503104l	T000503104l_F	Chr05	4817685	4817711	T000503104l_R	Chr05	4818080	4818059	TTCTTGAAATAACTTTGATCACTTCTT	ACATGTGTGCATTAGTCATCCC
Chr05	43.9	T000503147l	T000503147l_F	Chr05	4862853	4862875	T000503147l_R	Chr05	4863193	4863171	TAGTCTCACGGGCCACTATTATG	AGTGATCCAATTGACCGAAATAA
Chr05	45.8	T000503229l	T000503229l_F				T000503229l_R	Chr05	4944494	4944467	ACTTGTGTGAGGTGGACCTTTAG	TGAATTTATTTAATTACAAGTTGATCCG
Chr05	49.5	Satt276-2	Satt276-2_F	Chr05	5158611	5158586	Satt276-2_R	Chr05	5158320	5158345	AACAGATATTATTGACGGTAAGGACT	GAATTTAAATCTCATAATCGTCATCA
Chr05	53.5	s003501972	s003501972_F	Chr05	5459796	5459774	s003501972_R	Chr05	5459406	5459428	CCCTCTCATCCTATTCAAACCTT	GGATTTGGATGTCTCATGTTAGC
Chr05	55.1	s003501708	s003501708_F	Chr05	5724167	5724143	s003501708_R	Chr05	5723974	5723994	CCTTTAGTGAATTACTATGCCATGA	ATGCCAAAGCACAGGAAGTTT
Chr05	57.6	s003501332	s003501332_F	Chr05	6099952	6099930	s003501332_R	Chr05	6099755	6099781	TCCTATCTGTCTGCTTGATCCAT	TTGAGAATGATATTTCTTAGGAATGAA
Chr05	59.2	s003500986	s003500986_F	Chr05	6444769	6444743	s003500986_R	Chr05	6444582	6444606	GAGAGTCAAATACTAACGAATAGTCAA	AACATCGTCAATCTTACTCTTTACA
Chr05	60	s003500647	s003500647_F	Chr05	6784014	6783989	s003500647_R	Chr05	6783849	6783871	TGGGTACAATTCGTAGAATTAACATT	AACTCCAAATAATTTAAGCGCAA
Chr05	61	s003500347	s003500347_F	Chr05	7083709	7083682	s003500347_R	Chr05	7083510	7083528	TATAACATCCTAGAGTTAAAGTCATTAT	CTAACGTGGGTTCGGCAGT
Chr05	61.4	s003500045	s003500045_F	Chr05	7385438	7385416	s003500045_R	Chr05	7385039	7385061	TCCTCTGTGAATCAGGCATATTT	AATTTGAACCGCATTATTAGCAT
Chr05	61.8	T000506202s	T000506202s_F	Chr05	7584041	7584060	T000506202s_R	Chr05	7905212	7905191	TTCTAAACCAAGTAATACTGCCCA	TGACAGCTAACGCCAACACTTA
Chr05	62	T000506451l	T000506451l_F	Chr05	8161203	8161225	T000506451l_R	Chr05	8161551	8161529	ATGGGCATTACCAGGTTGTTATT	TAAAGCACTATGTGGCTATGTGG
Chr05	62.1	T000506933s	T000506933s_F	Chr05	8645607	8645631	T000506933s_R	Chr05	8645814	8645792	GCTGATAGTTTAGCTCTTTATCCCA	TTCTTCAAGTTGGTTGTTGTGTG
Chr05	62.4	T000511990m	T000511990m_F	Chr05	8645915	8645937	T000511990m_R	Chr05	8646133	8646109	ATCTAACCCGCATATTTCTCTCC	AAACAATCAGTAGAGGATCCAGATG
Chr05	62.4	T000513220m	T000513220m_F	Chr05	9895984	9896003	T000513220m_R	Chr05	9896247	9896225	TTTGCACCCTACAAATGCTA	TTCGAATTATATGCAGGTCCACT
Chr05	63	T000513898l	T000513898l_F	Chr05	10563657	10563679	T000513898l_R	Chr05	10564036	10564014	TCTAAGGACACTTGAATTCGTTT	AGCCTAGGTGAATGATTGTTTGA
Chr05	63.4	T000515027l	T000515027l_F	Chr05	11795402	11795380	T000515027l_R	Chr05	11795029	11795051	CGGATGGGTTGATATACCAAGTT	CATGCATCTTATTGATACCCAAA
Chr05	63.4	T000515966m	T000515966m_F	Chr05	10853542	10853520	T000515966m_R	Chr05	10853311	10853333	GGAAGACATATACCAGGCAACTG	ACGTACGCACGTAACTGAGAATA
Chr05	63.7	T000509183s	T000509183s_F	Chr05	13746876	13746857	T000509183s_R	Chr05	13746699	13746722	GTGAGCCCAGAGCATTTGAT	AAGATGATTGGTTATATGTACGTG
Chr05	63.7	T000509488l	T000509488l_F	Chr05	13452049	13452029	T000509488l_R	Chr05	13451701	13451723	AAACAATTTAACCTTCCCAAA	CAATTTGTCTTGATGGAAGTTGA
Chr05	63.7	T000510174l	T000510174l_F	Chr05	12754731	12754709	T000510174l_R	Chr05	12754363	12754385	AACAACCACATTAACGATCATCC	AAACCTTGCAATTGTCTTCAGAG
Chr05	64	T000510747m	T000510747m_F	Chr05	14232329	14232351	T000510747m_R	Chr05	14232602	14232580	TGACTCACAGTATGTAGGGCAAC	TTTAAATTAACATCCGTACATGA
Chr05	64.2	T000511342s	T000511342s_F	Chr05	14837977	14837999	T000511342s_R	Chr05	14838129	14838107	TCTTACTTCCTTTCTGTCCGTTG	TCCTTCGTGCAAACCTATTTCTA
Chr05	64.5	T000517293s	T000517293s_F	Chr05	15796292	15796314	T000517293s_R	Chr05	15796501	15796478	TGATTCAACAAACAGAATGGAGA	CATTGCCAAATCTATTGTATGCAC
Chr05	64.8	s000318623-2	s000318623-2_F	Chr05	16381152	16381126	s000318623-2_R	Chr05	16380953	16380975	CATTGAGATCATTGTATGATGTAGTTT	AGCAGTCGAGGTAGTATGAATGA
Chr05	64.8	s000317639-2	s000317639-2_F	Chr05	17367157	17367135	s000317639-2_R	Chr05	17366793	17366815	CCCAACCTCTCGAGTTAAAGAAC	CTTAGACATGCATCCCAAATGTT
Chr05	64.8	s000314909-2	s000314909-2_F	Chr05	18438424	18438403	s000314909-2_R	Chr05	18438277	18438300	TCACTGGACCGAGGTTACTCTT	ACAGATACCATAACACCTGTATTT
Chr05	64.8	s000311101-2	s000311101-2_F	Chr05	22220451	22220429	s000311101-2_R	Chr05	22220250	22220273	TCTTATATGCACCCAAACAAACA	TGGTTGGATTAGAAGTGGATTACA
Chr05	65.6	s000310179-2	s000310179-2_F	Chr05	23135772	23135744	s000310179-2_R	Chr05	23135323	23135352	ATTATCTATTTAATTACAGACCGGAAATG	AGGTTACTCGTATTAGAAAGATTACACACA
Chr05	66.6	s000309231-2	s000309231-2_F	Chr05	24100881	24100857	s000309231-2_R	Chr05	24100610	24100632	TTTGTAAGTTGATTTCTAACGGTCA	GAACCTTCTGAACACCAATGAGA
Chr05	68.5	Satt591	Satt591_F	Chr05	25343778	25343791	Satt591_R	Chr05	25343942	25343922	CGACCTTAATGATA	CCCAAAGCTTAAAATTTAATA
Chr05	69.9	s000306883-2	s000306883-2_F	Chr05	26431902	26431880	s000306883-2_R	Chr05	26431506	26431528	AGAGAAGGTCCCTCATATTCACG	GATCGACATCTTCAGTCCATTCT
Chr05	69.9	s000307246-2	s000307246-2_F	Chr05	26076077	26076055	s000307246-2_R	Chr05	26075884	26075906	AAATTGTGTCTCTTCTCATCCTT	AGTCAATCAATCACATTTACGCA
Chr05	70.9	s000306482-2	s000306482-2_F	Chr05	26833458	26833436	s000306482-2_R	Chr05	26833059	26833082	GCTTGAAAGGGATGAACACTTCT	GGCTTTGTACCACCATAAATTAAA
Chr05	72	s000305748-2	s000305748-2_F	Chr05	27568315	27568293	s000305748-2_R	Chr05	27568167	27568189	GTGCGTTAAGTTCCTCTGTTCCT	TGGATTTCAATGACTTAATACAA
Chr05	72.3	GMES0477	GMES0477_F	Chr05	27609449	27609430	GMES0477_R	Chr05	27609155	27609174	ATTCCGACCTCGAAGATTCC	CGTCTCTCGAAGAAGGGTTG
Chr05	73.6	s000305464-2	s000305464-2_F	Chr05	27853453	27853435	s000305464-2_R	Chr05	27853282	27853304	CATGCATGTAATGCACGCT	CATACGTTTGTAACATTGGCTTC
Chr05	73.6	C05-BARC-044399-08697	C05-BARC-044399-08697_F	Chr05	27882796	27882815	C05-BARC-044399-08697_R	Chr05	27882895	27882876	GGCTATCATGGTCTGTGCTA	CAGAACAAGTGAATGAAAAC
Chr05	76.1	s000305125-2	s000305125-2_F	Chr05	28187258	28187236	s000305125-2_R	Chr05	28186887	28186909	CCGTGCAGTCCGTCAGCGAGGATACATATGACTTGCTCCA	TGGTCTGGTTTAGTTTAACTGGC
Chr05	78.1	T000531672l	T000531672l_F	Chr05	28419776	28419792	T000531672l_R	Chr05	28420189	28420167	ATGCTGCATTCCCATTT	AATGTTAAGAACAGCTAAAGGTT
Chr05	82	T000531787l	T000531787l_F	Chr05	28534205	28534227	T000531787l_R	Chr05	28534564	28534542	TTAACTCGTGACAATACAAGCGA	TTATGGATTTAAGGCTCTGTTGG
Chr05	83	s000304457-2	s000304457-2_F	Chr05	28854607	28854585	s000304457-2_R	Chr05	28854409	28854432	CCGTGCAGTCCGTCAGCATGTACACACAAGTAGCCAGCCT	TCATGTTGTATGCTAGAGGTTCAA
Chr05	85.3	Sat_356	Sat_356_F	Chr05	29134738	29134763	Sat_356_R	Chr05	29135003	29134977	CCGGAAAAATGTGAGAAATCATAAAA	TTGCATGACTATCATTCAATCAAAAAT
Chr05	89.9	Satt050	Satt050_F	Chr05	29578039	29578054	Satt050_R	Chr05	29578232	29578214	GAACGTCCCAACAATG	GGCCTTGTAAACATATAGG
Chr05	94.4	T000533388m	T000533388m_F	Chr05	30133667	30133691	T000533388m_R	Chr05	30134004	30133982	AAATCGATTCTTAGACCGGTTAGTT	TCTAAATCAGTGACAGGGTCAAA
Chr05	95.1	C05-BARC-031361-07062	C05-BARC-031361-07062_F	Chr05	30427898	30427879	C05-BARC-031361-07062_R	Chr05	30427806	30427825	GAAGAGTACTGGTTTGAAGC	GCTCGAGTTGTCATTAATCC
Chr05	96.2	Sat_407	Sat_407_F	Chr05	30466000	30465976	Sat_407_R	Chr05	30465778	30465805	TCAAAGAACACAACTTAAATAATAAAT	ATGAATTACATTACATATGAAAAAGATA
Chr05	98.2	s000302553-2	s000302553-2_F	Chr05	30764713	30764691	s000302553-2_R	Chr05	30764531	30764553	AATTCAGATGTAACTGCACCGTC	GGATCTGACGCTCTCAGCTATTA
Chr05	101	s000302219-2	s000302219-2_F	Chr05	31098780	31098761	s000302219-2_R	Chr05	31098598	31098624	AAAGATCCAAACCATGCACC	GGAGATAATATAACAAGATGGTCAAGC
Chr05	103.8	C05-BARC-026129-05273	C05-BARC-026129-05273_F	Chr05	31434225	31434207	C05-BARC-026129-05273_R	Chr05	31434146	31434165	CCTCGTACATAGTATAAAC	CCCTAATCTGCTAGCTAGGT
Chr05	103.8	s000301875-2	s000301875-2_F	Chr05	31441044	31441024	s000301875-2_R	Chr05	31440887	31440913	CCTTTGCAGGTTGCATCTAAA	GATGGAACTTACTTAAGATATGAGAAA
Chr05	105.4	T000534921m	T000534921m_F	Chr05	31670346	31670368	T000534921m_R	Chr05	31670571	31670549	AGACCATATCAAATGCTGGACAT	CACAATCTAGTTTCGGCCTACAT
Chr05	106	SOYNOD26A	SOYNOD26A_F	Chr05	31850633	31850650	SOYNOD26A_R	Chr05	31850746	31850726	GAACAAAATGCCTGAGTT	CCATTCTCAATTCTTCTAGTT
Chr05	106	T000535184s	T000535184s_F	Chr05	31933425	31933444	T000535184s_R	Chr05	31933624	31933603	GATGCCGTGAATTCCACTTT	TAGAAGTCAAATTGGCAAGGGT
Chr05	107.3	T000535489l	T000535489l_F	Chr05	32238382	32238403	T000535489l_R	Chr05	32238727	32238705	TTTAGGTGGAAGTGTGTAACCT	AGTCATAACCGTGCATAGACATC
Chr05	108.1	C05-BARC-039495-07502	C05-BARC-039495-07502_F	Chr05	32440194	32440213	C05-BARC-039495-07502_R	Chr05	32440271	32440252	TTACAGGCCATTGTTTGAAG	GACACTTGTTGCAGTGTAGG
Chr05	108.4	T000535778m	T000535778m_F	Chr05	32514620	32514642	T000535778m_R	Chr05	32514900	32514878	ATGTAAGTGGAGTGTGCCTTGAT	CTTTGGGTACCTACAGAAATTCA
Chr05	110.8	T000536122m	T000536122m_F	Chr05	32882825	32882851	T000536122m_R	Chr05	32883156	32883136	TGAGATGAGATTAAGATTGATTATTGG	CAGATTCTGATGGTTTCGGAG
Chr05	111.9	T000536198l	T000536198l_F	Chr05	32958946	32958968	T000536198l_R	Chr05	32959314	32959291	GAAAGGTCGTTTCTATAAAGGTT	TGGTTTCACTATCTAAATTGGGTC
Chr05	113.2	T000536371s	T000536371s_F	Chr05	33132069	33132091	T000536371s_R	Chr05	33132267	33132245	TTCTATCTCCTCTTGATCCTCCC	CTCACGTGAATCAATCTGTGATG
Chr05	113.2	T000536435m	T000536435m_F	Chr05	33196051	33196076	T000536435m_R	Chr05	33196377	33196355	CATTTCATTATACATGATTGTCAAGG	ATGTTACGGGAAATTTGTTCTCA
Chr05	113.2	GMES3395	GMES3395_F	Chr05	33198378	33198359	GMES3395_R	Chr05	33198123	33198146	GTCACGGTCTTTCACAGGGT	GGATTGAATCAAATGAAAATGAAA
Chr05	114.3	GMES0965	GMES0965_F	scaffold_614	6457	6476	GMES0965_R	scaffold_614	6549	6530	TGGGTTGTGGTCAAACAAGA	CAAACCAATTTGCGAAGAAA
Chr05	114.8	T000536768m	T000536768m_F	Chr05	33535998	33536021	T000536768m_R	Chr05	33536281	33536259	CCCTTGTTTGTTAACTCTCACCTT	AATGCTCATGTCAGATTTCTGCT
Chr05	115.9	T000537010m	T000537010m_F	Chr05	33777646	33777668	T000537010m_R	Chr05	33777941	33777919	AACATGTAAAGAGCTAGCCATGC	ATGATATGGCTGAAGATTGAAGG
Chr05	117.5	T000537175l	T000537175l_F	Chr05	33943165	33943187	T000537175l_R	Chr05	33943519	33943497	CTCAATCATTTCAACCTACCTGA	TTTCCATCAAACGGAGATTATTG
Chr05	120.2	T000537309s	T000537309s_F	Chr05	34077161	34077183	T000537309s_R	Chr05	34077353	34077326	ACATGTTATCGCAGGCTAACTTT	GTATTAATTGTTAACACCTTCTAATTCT
Chr05	122.3	GMES0283	GMES0283_F	Chr05	34274748	34274767	GMES0283_R	Chr05	34275013	34274994	AGGGTACGGGGGAGAGAGTA	TTGGCACTCACCGAACCTAT
Chr05	123.2	T000537775l	T000537775l_F	Chr05	34543374	34543396	T000537775l_R	Chr05	34543750	34543728	TCTCGTCTTCACCTGTGGAATTA	ATCTTTACGTATCGACACCATCG
Chr05	123.5	C05-BARC-028171-05784	C05-BARC-028171-05784_F	Chr05	34697265	34697245	C05-BARC-028171-05784_R	Chr05	34697166	34697185	CGTCACATCTATTTTCACACC	GGGAAGATAGGAATATCTTG
Chr05	124.5	T000541937l	T000541937l_F	Chr05	34880702	34880680	T000541937l_R	Chr05	34880347	34880369	CCGTGTAATATGCGGTCTTTAAT	CAGAATCACAATTCGGATTTCAA
Chr05	124.8	T000541909s	T000541909s_F	Chr05	34908937	34908915	T000541909s_R	Chr05	34908741	34908763	CCACAACCATTCATCAATTTACC	ATATATTGTGTTCAAACGGTGCC
Chr05	124.8	T000541888s	T000541888s_F				T000541888s_R	Chr05	34929372	34929393	ATTGGATAAACCGATAACCCTGT	AAAGATCGTCCGCAACATTAAA
Chr05	125.6	T000541815m	T000541815m_F	Chr05	35002418	35002396	T000541815m_R	Chr05	35002209	35002231	ATGCAATGTGCATAGAAGAGTGT	ATGTTACATGAAGTCCACCTTGC
Chr05	125.9	Satt599	Satt599_F	Chr05	35125933	35125914	Satt599_R	Chr05	35125769	35125790	GTGTTTTTATTTGGTTTTTA	CCCTGCAGCTCAAAAATTAACT
Chr05	128	T000541110m	T000541110m_F	Chr05	35708376	35708354	T000541110m_R	Chr05	35708033	35708058	TCCTCTTACTGTATTTCCGCATT	TGACCAATTAAATAAATAGCTCCAAA
Chr05	129.7	GMES2489	GMES2489_F				GMES2489_R				CGGACATGGACGAGGTTACT	ACTCCTTGCCCTTGGAAACT
Chr05	132.4	Satt225	Satt225_F	Chr05	36741902	36741928	Satt225_R	Chr05	36742003	36741982	AAAAATGTGTTAGAGCTTGTGTTGTTA	GCCACACTATTCCAGCCACTAC
Chr05	135.5	T000539868l	T000539868l_F	Chr05	36951065	36951041	T000539868l_R	Chr05	36950719	36950741	TGTGTTGATAGGCTAAGTTGAAAGA	CAAGTCATAACCCGAAGGTTAAA
Chr05	136.9	C05-BARC-030735-06928	C05-BARC-030735-06928_F	Chr05	37006116	37006135	C05-BARC-030735-06928_R	Chr05	37006202	37006183	AGGAATCAGGACCAAATGGG	TGCTTCATGATAGGGATTGC
Chr05	137.9	s007803856-2	s007803856-2_F	Chr05	37207808	37207832	s007803856-2_R	Chr05	37207955	37207934	AAGGAAATTAATCACATGTAAACGG	GATCTTCCCGAGAAACAAACAC
Chr05	139.3	C05-BARC-028991-06048	C05-BARC-028991-06048_F	Chr05	37544498	37544517	C05-BARC-028991-06048_R	Chr05	37544591	37544572	TCCGATCGCCACAGAATATC	ACGATGATGTGGAAGGTGAC
Chr05	139.3	T000539254s	T000539254s_F	Chr05	37573429	37573408	T000539254s_R	Chr05	37573263	37573285	CGATCAAGTTAATTGGGTTTGAG	TTGTCAATATAACCTCCTCAGGG
Chr05	142.6	Sat_271	Sat_271_F	Chr05	37994273	37994246	Sat_271_R	Chr05	37994056	37994080	TCACTTTAATCATTACAATAAAACAACA	ACTTAGGCACACTCTAATATAACCA
Chr05	143.1	Sat_217	Sat_217_F	Chr05	38157094	38157067	Sat_217_R	Chr05	38156804	38156828	AAAAATTGTCAATGATATGATCAGTAAG	GTCCTAGATGAAAAATGCTTTGTAA
Chr05	144.2	T000538499s	T000538499s_F	Chr05	38329369	38329348	T000538499s_R	Chr05	38329202	38329224	AAAGTGTCAATCCACTGCACAA	CAGGTGACTTCTTCTAGGCCTTT
Chr05	144.7	T000538322l	T000538322l_F	Chr05	38506801	38506778	T000538322l_R	Chr05	38506437	38506462	AAAGAAAGTTGTAAGGTCAATGCC	TGTATCTTACAAATTGAGACATTCCA
Chr05	144.7	T000538317s	T000538317s_F	Chr05	38512083	38512061	T000538317s_R	Chr05	38511914	38511936	TATTTACAAGGCACCTGAACCAT	TTATACAGGTGCAATTTGATCCC
Chr05	144.7	T000538271s	T000538271s_F	Chr05	38558123	38558101	T000538271s_R	Chr05	38557922	38557944	CAATCTTAGACCATAATCCATTT	AAAGAGAATGATGCATGTGGAGT
Chr05	144.7	T000538238m	T000538238m_F	Chr05	38590841	38590819	T000538238m_R	Chr05	38590584	38590606	ACACAATAATGTTGCCTTTGTCA	ACCACTAGTGTCCAACGAACTGT
Chr05	144.7	s016401421-2	s016401421-2_F	Chr05	38668596	38668620	s016401421-2_R	Chr05	38668777	38668755	TGTGAAGTAAATAGGTTGAATTTGC	TCATAAACTTGTGAGTTTGCAGG
Chr05	144.7	T000538132s	T000538132s_F	Chr05	38697124	38697102	T000538132s_R	Chr05	38696919	38696941	CTAAACCCTAAATCCCATGAACC	TCATAGAAACGATGAAATCCACC
Chr06	0	T000600010s	T000600010s_F	Chr06	8889	8912	T000600010s_R	Chr06	9026	9004	CAATTTCTCAAAGCATAAGTTCCA	TTTGATATTGTTTCACCCTCAAT
Chr06	1.2	GMES6352	GMES6352_F				GMES6352_R	Chr06	458940	458959	CGTTCGTCACTCTCCCTCTC	AATTTGTAAGCAGCATGGCA
Chr06	1.4	Satt681	Satt681_F	Chr06	493703	493688	Satt681_R	Chr06	493468	493485	GTGCACTTGTCAATCTGTT	GTGAGGCATATGTCAGTC
Chr06	1.4	AW734043	AW734043_F	Chr06	525705	525727	AW734043_R	Chr06	525811	525788	CCACTTGTACCTAGATTGATATA	TTTTCAGATTAATTAGTACCTAGAT
Chr06	4.1	GMES1603	GMES1603_F	Chr06	1098134	1098153	GMES1603_R	Chr06	1098416	1098397	AGACACCGATTCATTCGACC	CTTAATTGGTTCGGGGGAGT
Chr06	7.9	Sat_130-2	Sat_130-2_F	Chr06	1856705	1856731	Sat_130-2_R	Chr06	1857143	1857118	TTCATTTGATACTTAAATCCAGAAATC	GTGGATTAATTACTTCAACATAAACG
Chr06	10.4	s002607789	s002607789_F	Chr06	2141614	2141592	s002607789_R	Chr06	2141440	2141464	TGAAGTTGTGAGATTTGTGCAAG	TTCTGACTTCTTGTCTAGCTACCCT
Chr06	13.5	s002607210-2	s002607210-2_F	Chr06	2734945	2734923	s002607210-2_R	Chr06	2734581	2734603	TCTGATTTGTTGGTTAAGTGGCT	ATTCAGTTCATGCGCTACAAAGT
Chr06	15.6	T000602951l	T000602951l_F	Chr06	2976783	2976806	T000602951l_R	Chr06	2977178	2977156	AACAATTTAGACAAACATGTCAGA	AGTTGTGATTGGTAAATTTGCTT
Chr06	16.1	T000603141s	T000603141s_F	Chr06	3166632	3166653	T000603141s_R	Chr06	3166829	3166806	GCGTTATACGTACACCCGGATA	CGAATCATATTTGAATGGTAACGA
Chr06	18.3	GMES5629	GMES5629_F	Chr06	3405251	3405232	GMES5629_R	Chr06	3404993	3405012	ATGATAAGCAACTCCACGGG	CGAACAAAGGAACCAGGAAA
Chr06	21.2	s002606194	s002606194_F	Chr06	3754707	3754685	s002606194_R	Chr06	3754312	3754336	TTAAAGAGGTGGATTGTCATCTG	GACTAGGCTCAAGTCTAATGTCTGC
Chr06	21.5	C06-BARC-016957-02165	C06-BARC-016957-02165_F	Chr06	3822862	3822843	C06-BARC-016957-02165_R	Chr06	3822793	3822812	GAGTTAACTATTTCGCGCAC	CTTCGGTCCTCAACTATTCG
Chr06	24.3	s002605873	s002605873_F	Chr06	4075342	4075320	s002605873_R	Chr06	4074981	4075003	ATAGCTTTGCAGCATCCTGATTA	TGTCTCAGATAATGGATTTGGCT
Chr06	27.6	s002605258	s002605258_F	Chr06	4656807	4656784	s002605258_R	Chr06	4656447	4656469	TGATCGATGATGTAAGTAAGGTGA	CATGTGCTTTGAGATGATGGTTA
Chr06	30.6	T000604871m	T000604871m_F	Chr06	4875129	4875151	T000604871m_R	Chr06	4875408	4875386	GGTTTACAGCTATGGTCGAATTG	ACAAACCATGGGAGGTTTAGATT
Chr06	31.4	T000604948s	T000604948s_F	Chr06	4952514	4952536	T000604948s_R	Chr06	4952713	4952690	AGGAGTGATGCAAACATTCCTTA	TTTAATCTCAACGGTCTATTATTT
Chr06	33.7	s002604620-2	s002604620-2_F	Chr06	5293261	5293238	s002604620-2_R	Chr06	5292783	5292804	AAACAAACACATCAAATACAATGA	GGCTTAATTTCCCTAATGGGAC
Chr06	35.5	C06-BARC-014949-01930	C06-BARC-014949-01930_F	Chr06	5409550	5409569	C06-BARC-014949-01930_R	Chr06	5405489	5405470	GTAGCATAAGCAGTAGCACG	CCTTCCTGACGATGATGATG
Chr06	36.8	s002603925	s002603925_F	Chr06	5988203	5988181	s002603925_R	Chr06	5987835	5987857	GATTAGACCGACCCTAATGCTCT	TTCGACGAGGGATAAAGTATCTG
Chr06	39	Satt432	Satt432_F	Chr06	6293038	6293017	Satt432_R	Chr06	6292764	6292786	GCCAGGTTGTGTTCTTGAGATA	TTCACCGAATATTCTTTTAGGTC
Chr06	40.9	GMES4236	GMES4236_F	Chr06	6865412	6865431	GMES4236_R	Chr06	6865728	6865709	GAAGACGTTCCTCACTTCGC	CGTCCATGTGCACGAAATAC
Chr06	42.3	s002602817	s002602817_F	Chr06	7094714	7094690	s002602817_R				GAACGTACACTTATTAGTTAAGGGA	TCATCTCTCTTAATATATTCTCCCTCTTC
Chr06	47.2	C06-BARC-026151-05283	C06-BARC-026151-05283_F	Chr06	7677251	7677233	C06-BARC-026151-05283_R	Chr06	7677157	7677176	ATAAAATGACGTAGAAGAG	GGCGCTTTGAATTTTGGTTC
Chr06	47.4	s002602116	s002602116_F	Chr06	7795595	7795573	s002602116_R	Chr06	7795215	7795240	GGAGGATTAGGCGTTTGATACTT	AAGTCTAACATGATAAAGTTTGTTGC
Chr06	49	s002601715	s002601715_F	Chr06	8197718	8197696	s002601715_R	Chr06	8197357	8197381	CCTTCTTCCTTTATTAACGACCG	TCATGAATCAACTATTGAAGCAGAT
Chr06	50.7	s002601386-2	s002601386-2_F	Chr06	8524779	8524757	s002601386-2_R	Chr06	8524427	8524449	ATTCCTTTGGACACAGATCTTCA	AAGGAGTCATCCCTCCTCAATTA
Chr06	50.7	Satt457	Satt457_F	Chr06	8787745	8787764	Satt457_R	Chr06	8788006	8787985	GTCCGTGTATTTTGTTTTGC	TTATCCATTTTCCCTTTAGTCC
Chr06	56	T000609415s	T000609415s_F	Chr06	9424141	9424163	T000609415s_R	Chr06	9424326	9424303	ATAGCTTGAATCATGTCTGAGAA	TGCAGTTATTTATACGAGTTGCTC
Chr06	57.9	GMES4267	GMES4267_F	Chr06	10058807	10058788	GMES4267_R	Chr06	10058594	10058613	ACTGCAAAGGGATGGATGAC	GCGAAGGCATTGGAGTACAT
Chr06	58.9	GMES4771	GMES4771_F	Chr06	10191220	10191200	GMES4771_R	Chr06	10191033	10191052	CGCTCACAAGTTCTCAACTCA	GATTTTTGCTTCCGGTGGTA
Chr06	60.3	GMES0001	GMES0001_F				GMES0001_R	Chr06	10639163	10639144	CTTTGGTCGCTTGAGTCTCC	GAGTACAGGCTCAAGACGGG
Chr06	62.2	GMES4162	GMES4162_F	Chr06	10964393	10964374	GMES4162_R	Chr06	10964219	10964238	CCAGGCCCAGATTCAAAATA	GTCCCACTGGCGAAGTATGT
Chr06	63.2	GMES0468	GMES0468_F				GMES0468_R	Chr06	10862467	10862450	GCAAACACGAAACAAGGGTT	GGGAATTCACCTGAATAAAACA
Chr06	63.2	Satt170	Satt170_F	Chr06	11293431	11293454	Satt170_R	Chr06	11293546	11293524	GGGAAATCTAAATAAAATGATGGATAT	GGGGTAGTTAAAATTCATCCTTAAAA
Chr06	63.2	C06-BARC-029635-06268	C06-BARC-029635-06268_F	Chr06	11338533	11338552	C06-BARC-029635-06268_R	Chr06	11338615	11338598	CCCTCTTTATTGGAGGATTG	GCAAAAACTGGCAAAAAAAC
Chr06	67.1	T000612075s	T000612075s_F	Chr06	12100585	12100607	T000612075s_R	Chr06	12100785	12100763	GTAGGCACCTCCAACCAATTAAC	ACTAGTTCCAGAGCTTCTTTGCC
Chr06	67.4	C06-BARC-031571-07113	C06-BARC-031571-07113_F	Chr06	12155637	12155656	C06-BARC-031571-07113_R	Chr06	12155711	12155692	CTTGTCAGTTGAACCAATGC	AGTGCCCATCTGCTAGAAAC
Chr06	67.4	T000612251l	T000612251l_F	Chr06	12276625	12276647	T000612251l_R	Chr06	12276968	12276946	TAGGCACCAGTCCCTACAAGTTA	GATGCTATTATGAGGGTCACGTC
Chr06	67.4	C06-BARC-022299-04310	C06-BARC-022299-04310_F	Chr06	12299841	12299860	C06-BARC-022299-04310_R	Chr06	12299934	12299915	TCTCTAGCTCGCGTTTCTTC	ACCGCTTCGTCGCTTATATC
Chr06	67.4	T000612321m	T000612321m_F	Chr06	12346817	12346840	T000612321m_R	Chr06	12347124	12347101	AAATTGATCCAGTGTTGGTGTAAA	TGCCAAATTAACACATTCTCTGTC
Chr06	70.4	T000612567m	T000612567m_F	Chr06	12593211	12593233	T000612567m_R	Chr06	12593471	12593447	AACTGAAGCAAGGAGATAGATGC	TTTAACTAACGATATAGGTCCAGAA
Chr06	75.1	T000613046m	T000613046m_F	Chr06	13071888	13071910	T000613046m_R	Chr06	13072175	13072148	CATTTGCAATGTTTGAATGCTTA	AAAGTATTATCTATACACACAACACACG
Chr06	80.6	s025700041	s025700041_F	Chr06	13817027	13817049	s025700041_R	Chr06	13817296	13817273	AGATTATGATTTCATTAGCGCGT	TTTGATAAATTCATTGTAAGCTCG
Chr06	84.2	T000614183m	T000614183m_F	Chr06	14228089	14228112	T000614183m_R	Chr06	14228339	14228316	AAGTCCTGATTTACGTATACCCTC	AAAGAAAGGTGCTTTACTAAGAGT
Chr06	86.7	Sat_213	Sat_213_F	Chr06	14643508	14643529	Sat_213_R	Chr06	14643694	14643670	ATCCCTAATTGTTATCTAATAA	CAATATACTCCCCCATACCTTCGCA
Chr06	91.2	Satt363	Satt363_F	scaffold_345	5789	5762	Satt363_R	scaffold_345	5551	5578	TAGAGGGATCCAATTAGAATCCAAGAAA	TCTTCGATCTTCATATTCATTTTTGTAA
Chr06	93.7	C06-BARC-040023-07637	C06-BARC-040023-07637_F	Chr06	16256023	16256004	C06-BARC-040023-07637_R	Chr06	16255926	16255945	TTGACCCTTTGTGAATTGCG	CCCCCTTTCCTTCACCATTT
Chr06	97	T000616552l	T000616552l_F	Chr06	16595828	16595850	T000616552l_R	Chr06	16596168	16596146	GCAAGGAATTACTCCTATCAAGC	GTTTAGGGTTCGACGATCGATTA
Chr06	99.5	Satt277	Satt277_F	Chr06	17217951	17217929	Satt277_R	Chr06	17217717	17217739	GGTGGTGGCGGGTTACTATTACT	CCACGCTTCAGTTGATTCTTACA
Chr06	100.6	C06-BARC-014491-01562	C06-BARC-014491-01562_F	Chr06	17477978	17477961	C06-BARC-014491-01562_R	Chr06	17477883	17477902	GCGGGTTTTTCATTTTGTGTC	GGCAGGCCAAGAAACAAAAG
Chr06	102.8	sF3H	sF3H_F	Chr06	18735971	18735991	sF3H_R	Chr06	18736073	18736048	TGTGAGATATTTGGCTACCACCTCC	CTAAACTCCAATGGGTCATTCCACTC
Chr06	103.6	FT1SSR9	FT1SSR9_F	Chr06	20073350	20073369	FT1SSR9_R	scaffold_94	29554	29535	GCGCTACAGTTCAACCCTTC	TGTTGGCCTTTCAATCTTGT
Chr06	103.6	C06-BARC-042161-08189	C06-BARC-042161-08189_F	Chr06	20279486	20279505	C06-BARC-042161-08189_R	Chr06	20279585	20279565	AAAAAAGGATACTTTCAATG	GAGGTGAAGAACATGAATAGC
Chr06	104.3	s005700017	s005700017_F	Chr06	21207119	21207148	s005700017_R	Chr06	21207330	21207308	CTTATAAGATAAACTATATTAAGAGGTGAC	TGAACTTAGTGCTCTTTGAGCGT
Chr06	105.7	s007100484	s007100484_F	Chr06	27748821	27748843	s007100484_R	Chr06	27749184	27749162	TGATGTTATGTGCTTATCGTTGC	ACTCTCCACCATTTAAAGCATCA
Chr06	105.7	C06-BARC-031099-06997	C06-BARC-031099-06997_F	Chr06	26236063	26236044	C06-BARC-031099-06997_R	Chr06	26235984	26236003	ATCTGATATGTGGCTGCTGG	GGATTGTTAAGGTAGATGAG
Chr06	106	s004400457	s004400457_F	Chr06	32797099	32797122	s004400457_R	Chr06	32797301	32797279	CCAAATTAAGATTTACCCGATTTG	AAACCGTAGCATAAGAACCCTTC
Chr06	106	s004400621	s004400621_F	Chr06	32962820	32962842	s004400621_R	Chr06	32963188	32963166	TGTGCAGAATGGCTTTATAACTT	AAACTTCTTTCATTCCCGTGTAA
Chr06	107.8	C06-BARC-029025-06052	C06-BARC-029025-06052_F	Chr06	35974978	35974958	C06-BARC-029025-06052_R	Chr06	35974914	35974930	CATAGCAACTATTTTCCAAAG	GGGCACTAGCCAAATAAAAA
Chr06	107.9	Satt708	Satt708_F	Chr06	37527906	37527930	Satt708_R	Chr06	37528142	37528115	CAATTTTAAGAGATTTTCGGGATAA	ACTCGGTTGATTTTTTTTTCAATTTTTT
Chr06	108.4	s025900023	s025900023_F	Chr06	42217240	42217262	s025900023_R	Chr06	42217607	42217585	TTAGTCAATCAAATTATAGGCAA	ATCTTCTCCCTTTGGTAACTTGG
Chr06	108.4	GMES0696	GMES0696_F	Chr06	42497148	42497167	GMES0696_R	Chr06	42497542	42497523	AGCTTCAACGCTCGACACTT	CTCATGGCCTCATCAATCCT
Chr06	108.4	s027000323	s027000323_F	Chr06	42918616	42918638	s027000323_R	Chr06	42918904	42918888	GGACCACCATTATCATCATTCAT	GAGAGGAGCTATTCTCCACTGTA
Chr06	108.9	Satt460	Satt460_F	Chr06	44049493	44049513	Satt460_R	Chr06	44049642	44049618	CGATGGGCTGTTGGTTTTTAT	CATACGATTTGGCATTTTTCTATTG
Chr06	109.2	T000643603m	T000643603m_F				T000643603m_R				CAATTGTCATTGGTGATTCTTGA	ACATCCAGTCGAGCACAACTATT
Chr06	109.3	T000643835m	T000643835m_F	Chr06	44386952	44386974	T000643835m_R	Chr06	44387195	44387172	ATAACTTCTTATGATGGACCTTT	TTTCCTACTCAAATCACTTACCGA
Chr06	110.5	T000644173s	T000644173s_F	Chr06	44722033	44722055	T000644173s_R	Chr06	44722235	44722213	GCATACTATTGGCCGTGAGTAGA	CTGCCACTAATGACTTCTCAATG
Chr06	111.3	T000644478s	T000644478s_F	Chr06	45037309	45037331	T000644478s_R	Chr06	45037484	45037462	GCAAATACTTGAGTTCTGCATTG	TCCAATTTGTAGAGAAGGAACCA
Chr06	111.3	T000644825m	T000644825m_F	Chr06	45391787	45391810	T000644825m_R	Chr06	45392075	45392053	TCCTTTAATTTATGTTTGACTCGG	CACCACTAGGTGATTTGGAACAT
Chr06	111.6	C06-BARC-025467-06510	C06-BARC-025467-06510_F	Chr06	45821093	45821112	C06-BARC-025467-06510_R	Chr06	45821181	45821162	CGTATCAAGCCCATGATAAC	CTACGATCTATTATGATTTC
Chr06	111.6	C06-BARC-010457-00640	C06-BARC-010457-00640_F	Chr06	45850830	45850849	C06-BARC-010457-00640_R	Chr06	45850903	45850883	GAGATTGATGGTGCTCCAAG	CCTCAAAAAAGACAAGTGTCG
Chr06	111.8	T000645398s	T000645398s_F	Chr06	45964846	45964869	T000645398s_R				GATTTGCAGTAGAAGAACTTGACA	AATGTAATAATTGGTCAAGGATG
Chr06	114	Satt307	Satt307_F	Chr06	46820476	46820489	Satt307_R	Chr06	46820631	46820609	CTGGCCTTTAGAAC	TTGTAGGAAATTTGAGTAGTAAG
Chr06	115.7	T000646749l	T000646749l_F	Chr06	47295137	47295159	T000646749l_R	Chr06	47295514	47295492	ATCAAGTGGAGTCATAGCCATTG	TGATAATGGTTCTCAAACCCAAC
Chr06	118.7	GMES1191	GMES1191_F	Chr06	47877938	47877957	GMES1191_R	Chr06	47878221	47878202	AGAAGCCAAACAACAATGCC	CTGGCTGGGACTGTGAGATT
Chr06	119.1	GMES4738	GMES4738_F	Chr06	47933864	47933845	GMES4738_R	Chr06	47933693	47933712	CTCATCACACGCTGCTACAA	TGAGCAGCCATTGCTATTTG
Chr06	119.9	Satt316	Satt316_F	Chr06	48015726	48015704	Satt316_R	Chr06	48015563	48015583	GTGAGAAACTAGCCAAGAATAGA	CAATTGTTTCCAAATGACACT
Chr06	120.6	s027400052r	s027400052r_F				s027400052r_R				CACCATTAAGGATCCCATAGTCA	AAATACAGGTTAACTTCAAGGTTT
Chr06	120.6	s027400057	s027400057_F	Chr06	48289073	48289095	s027400057_R	Chr06	48289397	48289375	TTGGCTCCATTACTGTTTGACTT	AGTTAAGGGTAAGGGCTGTATGC
Chr06	123	T000647986m	T000647986m_F	Chr06	48611637	48611659	T000647986m_R	Chr06	48611910	48611888	CGCAACATCTTTAACTTATGCAA	TGAAGATCTGTGTCCAGATGAGA
Chr06	124.3	T000648254l	T000648254l_F	Chr06	48862620	48862644	T000648254l_R	Chr06	48862926	48862904	TTGCATAACTAAATTGTCTACACACTAA	CAATTCTATCCGTCCTCCCTATT
Chr06	127.5	s022800028	s022800028_F	Chr06	49108402	49108380	s022800028_R	Chr06	49108102	49108124	TGTTGGTTATCATAAATCTCCGA	CCCTCTGTCTAAGCTAGGTGGTT
Chr06	128.9	C06-BARC-038923-07399	C06-BARC-038923-07399_F	Chr06	49188021	49188040	C06-BARC-038923-07399_R	Chr06	49188106	49188087	CTAGTAATCACTCCCAACCC	GGCCTATGGTGTCTTGATAT
Chr06	129.8	T000648696l	T000648696l_F	Chr06	49284765	49284787	T000648696l_R	Chr06	49285105	49285083	TTCCCTTCAAGAACAAATTACCA	TTGATTGCACAGACTTGAAGAAA
Chr06	132	GMES4077	GMES4077_F	Chr06	49645029	49645010	GMES4077_R	Chr06	49644850	49644869	ATCCCCTTTCAAGTCAGCCT	ATGATCATTGTCGGGGAGAG
Chr06	133.7	GMES6551	GMES6551_F				GMES6551_R	Chr06	49783251	49783271	TTCTTTTGGGCATCATTTCC	CAACATCCAAAAGCACTGTGA
Chr06	135.5	T000649317s	T000649317s_F	Chr06	49916707	49916729	T000649317s_R	Chr06	49916877	49916855	AGCCAAAGGAGCTTTAGTCCTAC	TATACTCCTCTCTCCTTCCAGCC
Chr06	135.8	T000649400m	T000649400m_F	Chr06	49999334	49999357	T000649400m_R	Chr06	49999687	49999664	AATGAATTCGAAATAAAGTTAGAC	CCAAACAAACTAATGATTAAACGG
Chr06	137.9	T000649516l	T000649516l_F	Chr06	50115211	50115233	T000649516l_R	Chr06	50115587	50115565	AAGAAATGTTTCCAGGAAGTGAA	TCTTCATGACTTGTCCAAAGGTT
Chr06	139.5	T000649627l	T000649627l_F	Chr06	50226259	50226285	T000649627l_R	Chr06	50226687	50226665	CATATAAAGTACGTGTTATAGCAATTT	GTTGCTAGAATTTGTCCGGATTT
Chr06	139.5	T000649664l	T000649664l_F	Chr06	50263345	50263363	T000649664l_R	Chr06	50263673	50263651	TACTAGCTCGTGATTTGCCTTGT	TCATCCACCTAACCATCTGCTAC
Chr06	140.3	T000649756m	T000649756m_F	Chr06	50356173	50356195	T000649756m_R	Chr06	50356346	50356324	ACACACTAACCCTGTACTCGCAT	ATATTCGGAACTTGAGCAAACAA
Chr06	141.1	Satt357	Satt357_F	Chr06	50508668	50508686	Satt357_R	Chr06	50508882	50508862	CCTGAGCAATTCATACTCC	TAACCGATCCGATCCTTGACA
Chr06	141.4	C06-BARC-042781-08405	C06-BARC-042781-08405_F	Chr06	50570163	50570144	C06-BARC-042781-08405_R	Chr06	50570083	50570102	CTGGTAAGAGAAATGGTAGC	CTCAATGATTCTTGGCCAAT
Chr06	145.6	T000650068s	T000650068s_F	Chr06	50739627	50739649	T000650068s_R	Chr06	50739804	50739780	CACACTTTCTTTACGGTCTGAGG	TTTCCTTATTCAGTAAGAGCACTCC
Chr06	146.9	T000650178l	T000650178l_F	Chr06	50851370	50851392	T000650178l_R	Chr06	50851730	50851708	ACATTCTACACCAGTCCATTTGC	GACACACCAAACTTTCAGAAACC
Chr06	148.2	T000650186m	T000650186m_F	Chr06	50859638	50859660	T000650186m_R	Chr06	50859975	50859953	TTTATTGTTGATTTCGGGTGTTT	TCAGAATCTGCACCAATTAACCT
Chr06	149.3	T000650324m	T000650324m_F	Chr06	50997464	50997486	T000650324m_R	Chr06	50997792	50997769	TCCATCAATTGCCTCTTTACCTA	GATCCCAATCATCTAACTGACAAA
Chr06	149.5	T000650345s	T000650345s_F	Chr06	51017971	51017993	T000650345s_R	Chr06	51018168	51018146	TTCATTTATTTGACAAACCGCAT	AGTCAAATCAACAGGTATTTCGG
Chr06	149.6	T000650353m	T000650353m_F	Chr06	51026205	51026227	T000650353m_R	Chr06	51026468	51026446	GCAACTTCTTATGGTCAAGCCTA	TGCAGAGGTTGGTTATCAAGATT
Chr06	151.2	T000650496m	T000650496m_F	Chr06	51169322	51169344	T000650496m_R	Chr06	51169618	51169596	ATGCACAATAGTTAATCGATGTT	AACTGTGTGGCTGTAGCAAATCT
Chr06	154.4	T000650650m	T000650650m_F	Chr06	51323768	51323791	T000650650m_R	Chr06	51324032	51324010	GCATATAGATCAGATGTGTCGAGC	AGCTTCTTTCCTCATGTAACCCT
Chr07	0	T000700038m	T000700038m_F	Chr07	39131	39153	T000700038m_R	Chr07	39453	39428	TGATGAATGTTGTGAATTGAACG	CAATATATGCAAATTAAGTCGATCAG
Chr07	0	T000700095m	T000700095m_F	Chr07	98869	98888	T000700095m_R	Chr07	99205	99182	GCAACGACTCGATGTTGTAA	GGATCTTTATTCTGAGGAGGAATG
Chr07	0	Satt404	Satt404_F	Chr07	225578	225561	Satt404_R	Chr07	225389	225406	TCATCCGCCATTGATTTT	GCCCGGAACATACAAAAT
Chr07	1.1	C07-BARC-039701-07555	C07-BARC-039701-07555_F	Chr07	460613	460632	C07-BARC-039701-07555_R	Chr07	460686	460667	TACTCTCGAGTTCCTTGCAG	CATCCTGCAGCACTTGTTTC
Chr07	1.3	GMSC514-2	GMSC514-2_F	Chr07	509298	509324	GMSC514-2_R	Chr07	509662	509640	GGGACCATATTCTTGATATCACTTCTC	GTTTGGACGTTCCGGATTATCTT
Chr07	3.2	T000701267s	T000701267s_F	Chr07	1268000	1268025	T000701267s_R	Chr07	1268190	1268168	TGATGGTTATAACTCACTAGCATTCA	TCACTTGGCATAATTGTTCATTG
Chr07	6.5	GMES1479	GMES1479_F	Chr07	1792035	1792054	GMES1479_R	Chr07	1792329	1792309	TGTGGGTGACAAAGATGAGG	TGCCTTTCTTTCCACAAGTCT
Chr07	7	GMES4149	GMES4149_F	Chr07	1949434	1949455	GMES4149_R	Chr07	1949823	1949804	CATCCATGTTCCTCTTTTCTCA	CTGCGTCGATTTGGAATTTT
Chr07	7.8	C07-BARC-042621-08318	C07-BARC-042621-08318_F	Chr07	2203387	2203368	C07-BARC-042621-08318_R	Chr07	2215323	2215342	TGAACATTAGTAGACTGCTG	CATCTGTTATGCAGCCATCC
Chr07	7.9	C08-BARC-042621-08319	C08-BARC-042621-08319_F	Chr07	2203359	2203378	C08-BARC-042621-08319_R				CCACAGAATCAGCAGTCTAC	GAAGTCCGTTGTTGCTGATG
Chr07	8.4	Satt150	Satt150_F	Chr07	2433896	2433920	Satt150_R	Chr07	2434102	2434081	AAGCTTGAGGTTATTCGAAAATGAC	TGCCATCAGGTTGTGTAAGTGT
Chr07	10.8	GMES4783	GMES4783_F	Chr07	2571041	2571022	GMES4783_R	Chr07	2570909	2570928	AGATCAAAATGTTGCGGAGG	TAGAGGCAGGAGCGAGAGAG
Chr07	10.8	GMES2848	GMES2848_F	Chr07	2571198	2571179	GMES2848_R	Chr07	2570909	2570928	GACCAATCCATAGCCGAAGA	TAGAGGCAGGAGCGAGAGAG
Chr07	15.4	s010700655	s010700655_F	Chr07	2782895	2782873	s010700655_R	Chr07	2782755	2782777	TTCCTGCAGATCTTATCAAGAGG	ACAAAGAACTTGGTATCATCAAA
Chr07	16.2	s010700293	s010700293_F	Chr07	3144333	3144310	s010700293_R	Chr07	3144230	3144252	TTCTCGTAACCAAAGTGGATAATG	GATATGTCAGTAGTGCCCATTCC
Chr07	16.5	C07-BARC-042631-08334	C07-BARC-042631-08334_F	Chr07	3203719	3203701	C07-BARC-042631-08334_R	Chr07	3203650	3203669	AACCCATTATAGTTAGCTG	AGGTCAGAGTTCCATTCAGG
Chr07	20.7	s010700001	s010700001_F	Chr07	3436281	3436258	s010700001_R	Chr07	3435891	3435913	TCAAGAACGAGTTTATCGTAGCTC	AAATAGGCCCTGCATATACGAGT
Chr07	26.2	T000703965m	T000703965m_F	Chr07	3991608	3991630	T000703965m_R	Chr07	3991828	3991806	TTTAAAGAGGCTTGGTTACTTCG	AGGTCTTGGTAAGCAATCATCAC
Chr07	29.4	C07-BARC-031399-07089	C07-BARC-031399-07089_F	Chr07	4246437	4246418	C07-BARC-031399-07089_R	Chr07	4246361	4246379	TTGCACTCTCATCTAATCAC	GTAAGACTTTTAAGATAGC
Chr07	29.9	s020200030	s020200030_F	Chr07	4323059	4323037	s020200030_R	Chr07	4322691	4322715	TCCTTCTTAGGTCTTGACAAGTG	TTGACTCACACATAAGGAACTACAA
Chr07	30.2	C07-BARC-015945-02020	C07-BARC-015945-02020_F	Chr07	4428825	4428844	C07-BARC-015945-02020_R	Chr07	4428890	4428874	CCAAAGGACAAAAGGGCTTC	GCCCGTGCCAAAATTCTAAC
Chr07	31.8	Satt567	Satt567_F	Chr07	4558650	4558667	Satt567_R	Chr07	4558761	4558743	GGCTAACCCGCTCTATGT	GGGCCATGCACCTGCTACT
Chr07	35.7	T000704890s	T000704890s_F	Chr07	4936182	4936204	T000704890s_R	Chr07	4936363	4936342	GGAGGTACTAAATTCAGCCAACA	CCGAGACTGTTATCGTTGGATT
Chr07	40.4	T000705452m	T000705452m_F	Chr07	5488842	5488864	T000705452m_R	Chr07	5489116	5489094	TAGGCATAAGCCAAGTAAAGAGC	ACATCGATGAAGGAGCATGTATT
Chr07	40.8	s014900168-2	s014900168-2_F	Chr07	5967565	5967544	s014900168-2_R				AACCTGTGATTGATGACGAGTG	TCAATCACTGTTGGCTATAACATT
Chr07	40.8	s020300806-2	s020300806-2_F	Chr07	6221271	6221249	s020300806-2_R	Chr07	6221125	6221154	ATAGTAGCGTGTTGGATAGGCTT	CATTGTTCTATCCTCTTTAATATCATTCTG
Chr07	42.7	C07-BARC-042815-08424	C07-BARC-042815-08424_F	Chr07	6442366	6442347	C07-BARC-042815-08424_R				GGGAGGCATGTCTGTAATGA	TACAACCCCCTAGAGTGATG
Chr07	42.7	GMES1143	GMES1143_F	Chr07	6611636	6611660	GMES1143_R	Chr07	6611780	6611761	CCAACAAATATAAAAATCAACCCTC	GGAAATGGTTTCGGATTTGA
Chr07	45.3	T000707138m	T000707138m_F	Chr07	7174452	7174467	T000707138m_R	Chr07	7174669	7174649	TGATGGCGCCTCCAAA	GGTGTAGTCGATCGCAATCTC
Chr07	45.7	T000707199l	T000707199l_F	Chr07	7235530	7235553	T000707199l_R	Chr07	7235909	7235884	CGGTTGATTGATATTACTTTGAGG	CAATCAGTAAGTCCAACCCTAATACA
Chr07	48.7	T000707413m	T000707413m_F	Chr07	7450842	7450864	T000707413m_R	Chr07	7451147	7451120	TTGGGAAATCACTAAGCACTGTT	CGTTATCTTGTAAATAAGTCTAGTCTCC
Chr07	51.3	T000707720l	T000707720l_F	Chr07	7757957	7757980	T000707720l_R	Chr07	7758320	7758297	TTGAATCTCTAAGGCACTTCTTCA	CCATCTTCTTAGGACATTATCACG
Chr07	54.7	Satt463	Satt463_F	Chr07	8282338	8282313	Satt463_R	Chr07	8282118	8282143	TTGGATCTCATATTCAAACTTTCAAG	CTGCAAATTTGATGCACATGTGTCTA
Chr07	57.9	GMES0689	GMES0689_F	Chr07	9065622	9065603	GMES0689_R	Chr07	9065434	9065453	CTGGCCAGAGACCAGAGAGT	GAGCACACCATGGAACTGAA
Chr07	59.5	C07-BARC-016783-02329	C07-BARC-016783-02329_F	Chr07	9664500	9664481	C07-BARC-016783-02329_R	Chr07	9664417	9664436	ATTTCATCTGCCGCAGTTCC	TGATGCTGGAATAGCTGTGG
Chr07	60.6	T000709733s	T000709733s_F	Chr07	9777138	9777159	T000709733s_R	Chr07	9777343	9777323	GGACTGCATGACATGGCTTAAC	AAATCCTAATGGCATTGATAA
Chr07	63	s023200001	s023200001_F				s023200001_R	Chr07	10265035	10265062	TCACTTAGACTATAAAGGATAATAAACA	TTTGAATTAATTAACCTAGCTATGATGT
Chr07	64.4	Satt323	Satt323_F	Chr07	10463949	10463969	Satt323_R	Chr07	10464104	10464081	GTCGTCCTATCTAATGAAGAG	TGTGCGTTTAAATTGCAGCTAAAT
Chr07	64.7	T000714755s	T000714755s_F	Chr07	10532985	10532963	T000714755s_R	Chr07	10532787	10532809	TTTAAGCAACATGGAAGAGCATT	TTTAATTTGTTAGGTTTCCGGCT
Chr07	64.7	Sat_258	Sat_258_F	Chr07	10654981	10654955	Sat_258_R	Chr07	10654795	10654819	CAATAGATAATCGAAAAACATACAAGA	GGGAAAGTGAAAACAAGATCAAATA
Chr07	64.7	GMES0583	GMES0583_F	Chr07	10675259	10675278	GMES0583_R	Chr07	10675523	10675504	GCTTGCTTCCACGATTCTTC	TGTAGCGGTGTGTGTTTGGT
Chr07	65.8	C07-BARC-032007-07237	C07-BARC-032007-07237_F	Chr07	11699293	11699274	C07-BARC-032007-07237_R	Chr07	11699227	11699246	CTGAAAAACTCGAGTATATG	CATGATCCCTGACTACTTGG
Chr07	71.1	T000714935m	T000714935m_F	Chr07	15020115	15020137	T000714935m_R	Chr07	15020452	15020432	ATATAGAGACTACCCGCTACCCG	AGCCACTCTCGTGAAGTCATAAA
Chr07	72.7	T000714998l	T000714998l_F	Chr07	15083101	15083123	T000714998l_R	Chr07	15083481	15083459	CATTGATTTGGTTGAGACAGTGA	AACATAGCCGATTCAGGGTAAAT
Chr07	74.3	s003407198-2	s003407198-2_F	Chr07	15209390	15209373	s003407198-2_R	Chr07	15209193	15209212	GGGATGCTACGAAACCTT	ACGTCGCTGTCAAGGTCAAG
Chr07	76.4	s003406906-2	s003406906-2_F	Chr07	15500606	15500584	s003406906-2_R	Chr07	15500418	15500442	AATGTAGGTTCACTCAACCGATG	AAATAGATGGAATAGGCTTGTTAAA
Chr07	77.8	GMES4434	GMES4434_F	Chr07	15747496	15747515	GMES4434_R	Chr07	15747870	15747854	TGAAATCTCCCACAAGAAGC	AAGCCCATAGTCCTTGACGA
Chr07	79.2	C07-BARC-041817-08104	C07-BARC-041817-08104_F	Chr07	16168038	16168019	C07-BARC-041817-08104_R	Chr07	16167948	16167967	AGGGCGCTATAAATTAATGC	TTCCGCTTTCCTAGCTTTCC
Chr07	80.2	Satt230	Satt230_F	Chr07	16342304	16342327	Satt230_R	Chr07	16342523	16342500	CCGTCACCGTTAATAAAATAGCAT	CTCCCCCAAATTTAACCTTAAAGA
Chr07	80.5	Satt494	Satt494_F	Chr07	16519512	16519535	Satt494_R	Chr07	16519728	16519705	GGCCGGTTCTCATTACAGGTCTCT	GGATTTCCATCTTGAATTTTATTA
Chr07	82.9	Sct_147	Sct_147_F	Chr07	16888039	16888023	Sct_147_R	Chr07	16887913	16887929	TCTCGACTCACGACTCA	CCAAGGTCTCTCAGAGG
Chr07	87.2	GMES5158	GMES5158_F	Chr07	18180359	18180340	GMES5158_R	Chr07	18180113	18180132	CATTAGGCCTCACTCCCAAA	AACACCATGGTTCACCACCT
Chr07	87.5	C07-BARC-029795-06410	C07-BARC-029795-06410_F	Chr07	18351365	18351346	C07-BARC-029795-06410_R	Chr07	18351266	18351285	AGTTGAGGCTGTGAGTGTCT	GAGAAGCAAAAGAAACATTC
Chr07	89.6	C07-BARC-014319-01316	C07-BARC-014319-01316_F	Chr07	20696264	20696245	C07-BARC-014319-01316_R	Chr07	20696166	20696184	CGGCCACTCTGAAAAATTAG	CATGAGAACTACCATGTAT
Chr07	89.6	s014001830-2	s014001830-2_F	Chr07	24837228	24837205	s014001830-2_R	Chr07	24837029	24837051	AATATTACTGGAATACGCATAGTG	TCAACGAGATGCTGGTTATTACA
Chr07	89.6	s014001815-2	s014001815-2_F	Chr07	24851981	24851959	s014001815-2_R	Chr07	24851838	24851858	CATGTTTGCTTGTCATAGAATGG	TTTACAAGCACACCCATCAAA
Chr07	89.6	s017500010	s017500010_F	Chr07	33814553	33814575	s017500010_R	Chr07	33814900	33814878	CTAAGAAGGCTACTACCCAAGGC	CCGATATAATGGAAGCAATTGAA
Chr07	89.6	s015400132	s015400132_F	Chr07	34091876	34091901	s015400132_R	Chr07	34092242	34092220	AGATGAGATGAAGAGTAAATTAAAGA	TTTAGTCGCTAGATTGCACATGA
Chr07	89.6	T000734693l	T000734693l_F	Chr07	34561216	34561238	T000734693l_R	Chr07	34561586	34561564	TCACATCACACTTTAGCTGCTTC	GTGGGAAGAGTTGCAGATTCTAA
Chr07	95.8	s026300027	s026300027_F	Chr07	35589504	35589526	s026300027_R	Chr07	35589871	35589849	CAAGATGTTTACTTTGCCAGCTA	AAATGGTGACTGAATGATGGTTT
Chr07	99.4	s019100039	s019100039_F	Chr07	35991034	35991056	s019100039_R	Chr07	35991341	35991319	TTCCATAGACAATGCAGGAGAAT	TTTCAACCATTTCAGCTACACCT
Chr07	103.5	GMES0734.1
Chr07	103.6	C07-BARC-028385-05857	C07-BARC-028385-05857_F	Chr07	36707835	36707854	C07-BARC-028385-05857_R	Chr07	36707916	36707897	TCGGTGTAGATGGTAAGTCC	ATGGGTCAGATGATGGCAAG
Chr07	103.8	Satt551	Satt551_F	Chr07	37077913	37077934	Satt551_R	Chr07	37078138	37078117	GAATATCACGCGAGAATTTTAC	TATATGCGAACCCTCTTACAAT
Chr07	104.9	C07-BARC-045287-08922	C07-BARC-045287-08922_F	Chr07	37480835	37480816	C07-BARC-045287-08922_R	Chr07	37480739	37480759	GAGTGTGGTATTAGTATTTC	GTGAGATTCACCCAATAATAG
Chr07	106.8	GMES4369	GMES4369_F	Chr07	38015149	38015168	GMES4369_R	Chr07	38015284	38015264	AGGTTGAATCGCAGAAATGC	TCGTTATCGTCCTTGTCATCA
Chr07	108.4	GMES0798	GMES0798_F	Chr07	38179723	38179704	GMES0798_R	Chr07	38179532	38179551	CTCTTTGTGTCGCCTGGTCT	GAACCTGACCCTGCTGGTTA
Chr07	110.8	GMES0642	GMES0642_F	Chr07	38567416	38567435	GMES0642_R	Chr07	38567550	38567531	CTACCCTTCACAAAGCCACC	GCAAAACAAGAGGGGTTTGA
Chr07	111.4	Sat_121	Sat_121_F	Chr07	38575762	38575733	Sat_121_R	Chr07	38575616	38575643	GACAAATGTAAAAAGTGACAGATAGAATGT	GTGTGGTGGTGGTACAGTTTTATACTAA
Chr07	115.4	Satt250	Satt250_F	Chr07	39086827	39086846	Satt250_R	Chr07	39087028	39087005	CGCCAGCTAGCTAGTCTCAT	AATTTGCTCCAGTGTTTTAAGTTT
Chr07	117.1	T000739974m	T000739974m_F	Chr07	39928836	39928858	T000739974m_R	Chr07	39929107	39929083	ACGCTTCTTTAGTATTCCATGTT	GATGAAATAGTTAGAAAGGGTATTT
Chr07	123.1	Satt210	Satt210_F	Chr07	40918405	40918381	Satt210_R	Chr07	40918161	40918185	AAAAACGTCAGGTCAATGACTGAAA	GGGCTTAGATATAAAAAAAAAGATG
Chr07	127.4	s006803086-2	s006803086-2_F	Chr07	41526853	41526833	s006803086-2_R	Chr07	41526704	41526727	TCATAACTGCTGGTCCGTGAT	TGTCCCAAACCCATTTACTACTTT
Chr07	129.4	T000741880s	T000741880s_F	Chr07	41823896	41823914	T000741880s_R	Chr07	41824104	41824082	GATGAACCGGAGGATGAAA	CTTCCAAACAAACCAGATAAACG
Chr07	135.4	s006802361-2	s006802361-2_F	Chr07	42251591	42251569	s006802361-2_R	Chr07	42251192	42251214	ACGAACCATGCATCTAGTCAAAC	TCCGGAGTGAGCTAGAATACAAA
Chr07	139	s006802107-2	s006802107-2_F	Chr07	42505055	42505033	s006802107-2_R	Chr07	42504878	42504900	GTGTTGTTATTATCCGGCACAGT	TGAAATGTTCTTTCATTGTGTGA
Chr07	140.1	Satt308	Satt308_F	Chr07	42821045	42821027	Satt308_R	Chr07	42820907	42820929	TTAAGGTTGGCAGGGTGGAAGTG	CAGCTTTATACAAAAATCAACAA
Chr07	140.1	GMES5903	GMES5903_F	Chr07	42896209	42896190	GMES5903_R	Chr07	42895948	42895967	TCCTTTGTGGTAGGGTCCAC	GCGAACATAGCAAACGTTGA
Chr07	143	GMES6390	GMES6390_F	Chr07	43119946	43119925	GMES6390_R	Chr07	43119849	43119868	CAAGAGTTTTAGGTTTGTGGGA	CAAGTGAAGAGGACAAGGGC
Chr07	146.4	T000743441m	T000743441m_F	Chr07	43385770	43385792	T000743441m_R	Chr07	43386093	43386071	AGATCCTTCATGACCAAGAGTGT	TTCCTACTTCGTACGTTGGATTT
Chr07	148.6	Sat_359	Sat_359_F	Chr07	43600215	43600188	Sat_359_R	Chr07	43599875	43599901	GGTCACGATTCTAGTCACTATAACTTCA	CAACGTAAGAAATGTAAATACAATGGA
Chr07	148.9	C07-BARC-028517-05936	C07-BARC-028517-05936_F	Chr07	43654605	43654624	C07-BARC-028517-05936_R	Chr07	43654687	43654668	ACTCGTTGGAAGTGGGAATG	ACAACCACGCAAGATGGTAG
Chr08	0	T000800090l	T000800090l_F	Chr08	89878	89906	T000800090l_R	Chr08	90238	90216	GGATACATGAATAGTAATGGTTATTGAAA	TTAATTAAAGTGGATCAGTCCCT
Chr08	1.1	T000800432m	T000800432m_F	Chr08	433021	433045	T000800432m_R	Chr08	433268	433246	AAATGTTATGTCAATTACAAGTGCT	TCTGTATTGCTTTATGTCTTCCC
Chr08	5	T000800981s	T000800981s_F	Chr08	982117	982137	T000800981s_R	Chr08	982318	982296	ATAAATGATGTAACATGGGTCGC	GATTGCAATGGACCTCTCTTATG
Chr08	7.2	T000801202m	T000801202m_F	Chr08	1203432	1203454	T000801202m_R	Chr08	1203757	1203735	ATTCACTCGCTCTGCATATAACG	ATTATCATATGAGGATTCGGATG
Chr08	9.4	C08-BARC-021937-04237	C08-BARC-021937-04237_F	Chr08	1467871	1467890	C08-BARC-021937-04237_R	Chr08	1467964	1467944	AGAGCTGGTGCATTTATTCG	CCAATCATGTAACAACATAGG
Chr08	9.4	T000801549l	T000801549l_F	Chr08	1550486	1550508	T000801549l_R	Chr08	1550796	1550774	CTTCCACTCTCCAAACAAGAATG	AGCGAGCACCAACTGAATAAGTA
Chr08	10.2	GMES1342	GMES1342_F	Chr08	1802247	1802266	GMES1342_R	Chr08	1802546	1802527	TTATCAGCTGGCAAAAGCCT	CTTCACTCCTTTCTGCTCCG
Chr08	12.2	Sct_067-2	Sct_067-2_F	Chr08	2436350	2436369	Sct_067-2_R	Chr08	2436723	2436700	TCTCCTCTCTGCATTCACCA	TTTGCCACATCATTTTACTTATGA
Chr08	15.3	C08-BARC-044051-08595	C08-BARC-044051-08595_F	Chr08	3178647	3178666	C08-BARC-044051-08595_R	Chr08	3178725	3178706	GTAATTCAAGGCGCTGAAAG	ACCTGGTGCCTGAAATCTTC
Chr08	15.9	C08-BARC-042199-08208	C08-BARC-042199-08208_F	Chr08	3311444	3311463	C08-BARC-042199-08208_R	Chr08	3311527	3311508	TCCTCAGAGCAGAAAAAAGG	CAAATTCCTACCCAGGTGAG
Chr08	15.9	GMES1112	GMES1112_F	Chr08	3339474	3339455	GMES1112_R	Chr08	3339198	3339217	TTCCTGCTTCAAGATGGGAG	ACGTTCCCATTTCTTCGTTG
Chr08	20.4	GMES3525	GMES3525_F	Chr08	3603475	3603494	GMES3525_R	Chr08	3603680	3603661	ACGACACCCTTTTCTGCAAC	TTCTTCACCCCATCGAAGTC
Chr08	23.5	Satt207	Satt207_F	Chr08	4005798	4005821	Satt207_R	Chr08	4006030	4006010	TTTTTCTCATTTTGATTCCTAAAC	ATTGTGATTGTAGTCCCTAAA
Chr08	29.7	T000804292l	T000804292l_F	Chr08	4297017	4297039	T000804292l_R	Chr08	4297372	4297350	TCATCATGTAGACTTGCCATTTG	AATTCTGAACCCATCTAATCCGT
Chr08	32.9	T000804554s	T000804554s_F	Chr08	4559031	4559053	T000804554s_R	Chr08	4559231	4559213	GCTGCAATTAATCATGACGGTAG	AAATCAGCCACACACATTT
Chr08	37.3	s002207765-2	s002207765-2_F	Chr08	4901293	4901272	s002207765-2_R	Chr08	4901094	4901116	GCATAATTGGCACACTGGAAAT	GGACGACTTCACCCTAATCATAA
Chr08	38.2	GMES0604	GMES0604_F	Chr08	5170931	5170950	GMES0604_R	Chr08	5171145	5171126	GCAGCTGCCAACTGATACAA	CAAATGGTGACACGAGGAGA
Chr08	38.7	Satt589	Satt589_F	Chr08	5182058	5182081	Satt589_R	Chr08	5182232	5182208	CAGACAATTTCAGTGGCAGATAGA	AAAAAGTAATATAAGTAGAAAAAGG
Chr08	38.7	C08-BARC-025925-05160	C08-BARC-025925-05160_F	Chr08	5287077	5287058	C08-BARC-025925-05160_R	Chr08	5286985	5287004	CTCGCAAATTGAATCCACCC	AAGCCTTCTCGATCACCAAG
Chr08	42.5	s002206987-2	s002206987-2_F	Chr08	5680100	5680079	s002206987-2_R	Chr08	5679965	5679990	AGGCCACATTACACATACAAAT	AAGCATTTGTTAATATAGTTTCAGCA
Chr08	43.3	s002206558-2	s002206558-2_F	Chr08	6108446	6108429	s002206558-2_R	Chr08	6108230	6108251	CGACGAGCTTTGGCATTT	ATGTTGGTTGAATCACATCGAG
Chr08	46.9	T000806399s	T000806399s_F	Chr08	6400775	6400799	T000806399s_R	Chr08	6400980	6400965	TCAAGAATAGTAATCCACCAAGTGA	AAAGTATTTGGAACTTGAAAGTGTA
Chr08	51.1	T000806826m	T000806826m_F	Chr08	6829468	6829490	T000806826m_R	Chr08	6829770	6829747	AAATCCATAAGAGGTGTCCTAAA	AATTCATTATTAAAGTGAGCATGA
Chr08	54.6	GMES1620	GMES1620_F	Chr08	7122226	7122207	GMES1620_R	Chr08	7122031	7122050	TTCTCTCATCCCCTTTTTGC	CAAGTTTCTGGAGGAGGCAG
Chr08	57.2	C08-BARC-025811-05086	C08-BARC-025811-05086_F	Chr08	7470081	7470061	C08-BARC-025811-05086_R	Chr08	7469992	7470012	CTTTAGTCTTAACAGAACACG	GGGAAAATGAAACAAAGGGTG
Chr08	58.6	Sat_400	Sat_400_F	Chr08	7891093	7891120	Sat_400_R	Chr08	7891368	7891345	TTGAGCCAATTAAAATTATATTTATGAT	CAAATGCCATTCAATTAGTAGTCA
Chr08	59.4	Satt632	Satt632_F	Chr08	8222541	8222564	Satt632_R	Chr08	8222803	8222780	GGGCTATGAAGGGAATGGAAAGGA	CCCATATTGAAGATTTGAAGTAAT
Chr08	59.4	Sat_162	Sat_162_F	Chr08	8282868	8282850	Sat_162_R				TGGTTTTTCGCTGGATATA	CATTTCGTAACATATTTTTCAC
Chr08	60	AY262686B	AY262686B_F	Chr08	8372116	8372135	AY262686B_R	Chr08	8372454	8372435	CTCACTAATAGCGTGATTGG	ACACTCTAGTAGTAAGCGGAC
Chr08	60.8	AY262686Z	AY262686Z_F	Chr08	8591700	8591677	AY262686Z_R	Chr08	8591423	8591446	GAAGCTGTCCTGTAATCTGTCACC	CACCTACAAGAGTCTGCTTGATCC
Chr08	62.2	s002203917	s002203917_F	Chr08	8883183	8883161	s002203917_R	Chr08	8882817	8882840	TGACACCACACACATCAATTACA	CACACATTAGTAACATTTGCATGG
Chr08	62.3	s002203914	s002203914_F	Chr08	8886575	8886553	s002203914_R	Chr08	8886314	8886336	TCTATGAGCTGGCTTACATTTGA	CCAGGTAGATCGCTTACAAAGTG
Chr08	62.6	C08-BARC-015419-01822	C08-BARC-015419-01822_F	Chr08	8936460	8936441	C08-BARC-015419-01822_R	Chr08	8936364	8936383	GACACTTATTTTGGAATGGG	CCAACCGCTTCCTATATATC
Chr08	64.8	Sat_215	Sat_215_F	Chr08	9203404	9203424	Sat_215_R	Chr08	9203654	9203629	TAGCAACAAAGCAATCTACAG	TCCCATTTTATTCCACACTATGTAAT
Chr08	68.6	C08-BARC-039145-07456	C08-BARC-039145-07456_F	Chr08	10077769	10077788	C08-BARC-039145-07456_R	Chr08	10077855	10077835	AGATCTAGTTACTCAAGAGC	CCCATTAAATCGTCTATCAGC
Chr08	68.6	alphaP-AT17.5
Chr08	69.3	T000810277l	T000810277l_F				T000810277l_R	Chr08	10188374	10188351	ATCACAATTGAGACGGGTGAT	AAAGATAAATTCCCAATGTAAGCA
Chr08	74.6	GMES1626	GMES1626_F	Chr08	11477458	11477439	GMES1626_R	Chr08	11477188	11477207	TTATGCCTTGATGCCCTTTC	CGGAGACTGTTAAACCGGAA
Chr08	76.9	C08-BARC-040893-07862	C08-BARC-040893-07862_F	Chr08	11761612	11761593	C08-BARC-040893-07862_R	Chr08	11761515	11761534	AAACCCTTAAAATTAGTAAA	GCTGCATGTGAGCTTCCTTG
Chr08	76.9	GMES2791	GMES2791_F	Chr08	11786242	11786261	GMES2791_R	Chr08	11786426	11786407	GTTGCTGCTCTTGGTCCATT	AACATCCAACCATTTTCCCA
Chr08	76.9	GMES0759	GMES0759_F	Chr08	11815379	11815398	GMES0759_R	Chr08	11815583	11815564	CTCTCTCGCCCTCTCTCTCA	TAATCGTTTCGGGAACCTTG
Chr08	80.2	C08-BARC-040357-07717	C08-BARC-040357-07717_F	Chr08	12898248	12898267	C08-BARC-040357-07717_R	Chr08	12898343	12898324	AAAAGTAGCAGGTTCTGGAG	ATCCAACAAGGGGCAATTTG
Chr08	81	s023900448-2	s023900448-2_F	Chr08	13168884	13168906	s023900448-2_R	Chr08	13169033	13169005	TGCTTAAAGTTGACTGCCTTTGT	AAACAATTAAGCTATAGGTAGAATGAACA
Chr08	81.3	GMES2839	GMES2839_F				GMES2839_R				CACACTCGTTTGGTTTCATCTC	GTGCACGTTCTCACAGAGGA
Chr08	82.6	GMES4195	GMES4195_F	Chr08	13575937	13575918	GMES4195_R	Chr08	13575578	13575597	GCAAGAATCGCACAACAGAA	ATGGTTGTTGAAAACCGAGG
Chr08	83.1	GMES6325	GMES6325_F	Chr08	13790853	13790872	GMES6325_R	Chr08	13791062	13791043	GAAGGACAGTGAGGGTGAGG	CCCTTGGCAGTCAACTCATT
Chr08	84.5	GMES4207	GMES4207_F	Chr08	14134869	14134888	GMES4207_R	Chr08	14135145	14135126	TTTCTGAAATAGCGTGCCCT	TTGAGTCCATTTTGTTGGCA
Chr08	85	GMES3946	GMES3946_F	Chr08	14212772	14212791	GMES3946_R	Chr08	14213046	14213027	CCCTTTCTCAAAACCCCATT	AGTTTTGGTCACAACGGAGG
Chr08	86.1	C08-BARC-043207-08556	C08-BARC-043207-08556_F	Chr08	14365429	14365409	C08-BARC-043207-08556_R	Chr08	14365330	14365349	GACTCTTCTCTTCCATCTAAC	CAGATCAAGCTTATAACAAC
Chr08	87.2	C08-BARC-016119-02287	C08-BARC-016119-02287_F	Chr08	14522890	14522909	C08-BARC-016119-02287_R	Chr08	14522970	14522951	TTCTCTCTTAGAGCACTCCC	TGGGTCTTTTACTAGGGTCG
Chr08	88	Sat_129	Sat_129_F	Chr08	14659970	14659950	Sat_129_R	Chr08	14659734	14659758	GGGGACTCCCTCTCCAGAAGTAAT	GGGAGCAATTGATAAGTGTGAAAATAAT
Chr08	89.6	GMES6201	GMES6201_F	Chr08	14792218	14792199	GMES6201_R	Chr08	14791924	14791941	ATTCGGTAACCTCTCCCTCC	GCTGGAGAGTATGAAACGCC
Chr08	93	GMES0714	GMES0714_F	Chr08	15071661	15071642	GMES0714_R	Chr08	15071388	15071410	TGGAAACTGCTGGTGTTTTG	TTCAATGTTAAGGTTTAGGCACC
Chr08	95.7	s014601205-2	s014601205-2_F	Chr08	15642862	15642884	s014601205-2_R				TGCTCTGTTGTTGAATAAGGGAT	ATGAAGATCGAACTCATTAAGGC
Chr08	96.8	C08-BARC-028281-05811	C08-BARC-028281-05811_F	Chr08	15848413	15848432	C08-BARC-028281-05811_R	Chr08	15848495	15848475	CCTTGGAGGTTAGATTTGTG	CCAATGTCAAACTCTAAGAAG
Chr08	96.8	s014601595-2	s014601595-2_F	Chr08	16033570	16033548	s014601595-2_R	Chr08	16033183	16033205	GGTTGAAACAAGACCCATTATCA	TCCTACTGGGACTAATACAGCGA
Chr08	96.8	s011302441-2	s011302441-2_F	Chr08	16177660	16177638	s011302441-2_R	Chr08	16177301	16177328	AGTAATCTTCCGGACCACACAAT	ACTTGTAGAAATTAACTATCTTACCTTT
Chr08	97	s011302137-2	s011302137-2_F	Chr08	16482313	16482291	s011302137-2_R	Chr08	16482164	16482193	GAGAGTCTGAGACCGATGTGAAC	TTCTCCTTGTATAGTGATTATAGCTAGTGT
Chr08	97	C08-BARC-042491-08277	C08-BARC-042491-08277_F	Chr08	16557082	16557101	C08-BARC-042491-08277_R	Chr08	16557153	16557135	CTATGCTTTGTTTGAAACCC	CAAACAGTTGAAAAACACC
Chr08	98	s011301837-2	s011301837-2_F	Chr08	16782460	16782438	s011301837-2_R	Chr08	16782273	16782294	AATGGATCAAATTTAGCAAGTTA	ATGCATGGAACGATCATTGTAA
Chr08	102.5	GMES3930	GMES3930_F	Chr08	17086545	17086528	GMES3930_R	Chr08	17086459	17086478	CGAGAACACTCTATCCCTCGTT	GATTGCACCATGTTGGTCAG
Chr08	104.7	T000817572m	T000817572m_F	Chr08	17504572	17504595	T000817572m_R	Chr08	17504899	17504877	GGGTTCAATAACAAGGCTTAATTT	TAATATGGCAAATGTTAATCGGG
Chr08	109.5	GMES1495	GMES1495_F	Chr08	18012683	18012702	GMES1495_R	Chr08	18012901	18012882	CGTGGAGAAGAATTGAAGCC	TGTTTATCGGAATGCGAACA
Chr08	112	Satt437	Satt437_F	Chr08	18870205	18870178	Satt437_R	Chr08	18869836	18869860	ATCCCATTGTAGTGCATTTATAGTGACG	GGTAACCTATTTTTTATGCTTCTGT
Chr08	114	s001810280-2	s001810280-2_F	Chr08	19211817	19211797	s001810280-2_R	Chr08	19211619	19211643	CCTCTTTGGCAGTTAAAGGCT	TGTTAGTTAAGACACAAAGTGCGTG
Chr08	114.5	GMES1220	GMES1220_F	Chr08	19299852	19299832	GMES1220_R	Chr08	19299600	19299619	CCCAGATGAGATGAAGACCAA	ATCCCCTAAGCCTCCCACTA
Chr08	114.8	s001809965-2	s001809965-2_F	Chr08	19529672	19529650	s001809965-2_R	Chr08	19529487	19529507	TTTGTCTGTTTGAGGAACCATTT	CACTTGCATGCCACGATATTA
Chr08	114.8	GMES1463	GMES1463_F	Chr08	19675865	19675884	GMES1463_R	Chr08	19676078	19676059	TTGAACCCTCCTCCCTCTTT	CCGAAAATCTCGAATACCCA
Chr08	115	s001809561-2	s001809561-2_F	Chr08	19935031	19935009	s001809561-2_R	Chr08	19934832	19934854	TGGAGAGAGACATCTACGAAAGT	GGCCCATGAATCTATACCAATTA
Chr08	115.6	s001809121-2	s001809121-2_F	Chr08	20375977	20375955	s001809121-2_R	Chr08	20375835	20375862	TTTCTCATTATTTCCCAACTGAT	TCACCTATTAAATTTATGGATAACAGAA
Chr08	116.1	GMES0152	GMES0152_F	Chr08	20402006	20402025	GMES0152_R	Chr08	20402382	20402363	GCAAGGGCTTGACTCCTCTA	TTTTATTCTTTCCCGTCCCC
Chr08	117.2	C08-BARC-021629-04159	C08-BARC-021629-04159_F	Chr08	20486748	20486731	C08-BARC-021629-04159_R	Chr08	20486676	20486696	GAAGGAATGGTTAACAAT	CATCATTCTCAATGATGTTGG
Chr08	118.2	s001808569-2	s001808569-2_F	Chr08	20927974	20927952	s001808569-2_R	Chr08	20927591	20927617	TATTCAGCCGTTAACTTCAGTCC	TGCATAAGTACTAAACGAATAAGAGCA
Chr08	121	GMES5716	GMES5716_F	Chr08	21801686	21801710	GMES5716_R	Chr08	21801845	21801826	CACTCAGTTTCTGCCTCTTATTTTT	TGGCTGCAAGATGTTAGTGC
Chr08	125.6	T000822864l	T000822864l_F				T000822864l_R				CTGCTGATATCCTCACGATGAA	AAATACAGCATGGGTGTGATGA
Chr08	128.7	T000822923l	T000822923l_F	Chr08	22840994	22841016	T000822923l_R	Chr08	22841366	22841343	ATGTGATATGGGTGTCATGTTCA	CAAATTTAAATCCTTCCACTAACC
Chr08	132.7	T000823214l	T000823214l_F	Chr08	23131037	23131058	T000823214l_R	Chr08	23131415	23131392	CCCTATGGCCCTATCTGTAATA	CCCATGTAAATACTTCGATGTCAA
Chr08	134.9	T000823620l	T000823620l_F	Chr08	23541123	23541145	T000823620l_R	Chr08	23541491	23541469	TGATGTCCCATAACCCTGTTAAT	TTTATGGAACAGTTAACCCGATG
Chr08	136	T000825762l	T000825762l_F	Chr08	25669231	25669254	T000825762l_R				TGATATATGTTATCACGTACCACT	CAATTAAACAGAATGCACAACAG
Chr08	137	T000826069m	T000826069m_F	Chr08	25977322	25977344	T000826069m_R	Chr08	25977616	25977594	TAGGACACACCTAGTTGCTCACA	CATGCATTTCCAAGGTATCTTTC
Chr08	137	T000826836s	T000826836s_F	Chr08	26726088	26726110	T000826836s_R	Chr08	26726380	26726358	ATACCAGAGATCAGCGGAGTGAT	AAAGTGTTCTACCTGGATGGATG
Chr08	137.3	T000831023s	T000831023s_F	Chr08	31677587	31677609	T000831023s_R	Chr08	31677782	31677759	CACTCTTGTGCTGAACAACCTTA	GACCATATGATGTGCAGTTCTTTC
Chr08	138.7	s002900066	s002900066_F	Chr08	37208487	37208465	s002900066_R	Chr08	37208188	37208211	AGGGATGAGACTGTAGCTCTGTG	GGGAATATTGGTAAATATTTGTGC
Chr08	139.7	s014700009	s014700009_F	Chr08	38802852	38802831	s014700009_R	Chr08	38802582	38802604	AAGAGGTTGAAGAAACTGACGC	AACATCATTCAAGCACCCATATC
Chr08	141.6	GMES3015	GMES3015_F	Chr08	39397561	39397544	GMES3015_R	Chr08	39397290	39397309	TTGACACTGTTTCACAGGGC	TGTGTCCACCGCATACAAGT
Chr08	142.8	T000839074s	T000839074s_F	Chr08	39705950	39705974	T000839074s_R	Chr08	39706140	39706118	TTGTTTACAGTTTATTCACCAAGAA	TTGCTAGGAAATAGCTCTTGGAA
Chr08	143.5	C08-BARC-042889-08449	C08-BARC-042889-08449_F	Chr08	39863324	39863343	C08-BARC-042889-08449_R	Chr08	39863417	39863398	TGTCACTTGGATACCACTGC	AGATCCAATGGCACACTTCG
Chr08	143.7	T000839411s	T000839411s_F	Chr08	40043288	40043310	T000839411s_R	Chr08	40043445	40043423	TGAAACACATTTGACTGCACCTA	TGACTTGTCATGAACTAAATGCG
Chr08	145.6	T000840052s	T000840052s_F	Chr08	40678607	40678629	T000840052s_R	Chr08	40678796	40678773	TTATAATTTCACTACGCAATGGG	AATGCACTGACGAAGCTAGACTAA
Chr08	149.5	T000840473s	T000840473s_F	Chr08	41107697	41107719	T000840473s_R	Chr08	41107906	41107884	CAAATGTTCTGTTCCATTGGTTT	TTGAACATGAAGTGGTAACTTGG
Chr08	150	T000840975l	T000840975l_F	Chr08	41609114	41609136	T000840975l_R	Chr08	41609479	41609456	ATGTGACTTGTTCGTGTGAGAGA	GCAAGACGTTCTGACAAGGTACTA
Chr08	151.4	C08-BARC-028831-06024	C08-BARC-028831-06024_F	Chr08	42173880	42173899	C08-BARC-028831-06024_R	Chr08	42173969	42173950	CATGCTTAATTAATCCCCCC	GACCAGTTAACAGATCAACA
Chr08	151.4	Satt209	Satt209_F	Chr08	42189884	42189903	Satt209_R	Chr08	42190031	42190006	GTGGATAAAAGCCATCTCTA	TCCATAGGCTTAATTCTTATGATGTT
Chr08	154.4	s022700259	s022700259_F	Chr08	42769862	42769886	s022700259_R	Chr08	42770218	42770196	AAATAGGTCATCTACCTCTTGTTTG	CTTGAGTTATCTTTCTCAAGCCT
Chr08	159.2	GMES0681	GMES0681_F	Chr08	43898297	43898278	GMES0681_R	Chr08	43898105	43898124	CACAATATTTGGACCGAGGG	TCCATCGCGTCAATTACAAA
Chr08	161.1	s018600015	s018600015_F	Chr08	43979150	43979172	s018600015_R	Chr08	43979307	43979285	TTTGACTGATGATCCTAATCGCT	ATGTCAAGGGATTTCTGTCTCAA
Chr08	165.3	T000843805s	T000843805s_F	Chr08	44638754	44638776	T000843805s_R	Chr08	44638958	44638942	AATTAGCAATGTCGCTTGGATTA	GATTCATGCGTGCAGGG
Chr08	168.6	Satt409	Satt409_F	Chr08	45105010	45105036	Satt409_R	Chr08	45105191	45105166	CCTTAGACCATGAATGTCTCGAAGATA	CTTAAGGACACGTGGAAGATGACTAC
Chr08	169.2	GMES1684	GMES1684_F	Chr08	45194777	45194758	GMES1684_R	Chr08	45194554	45194573	TGACATCCACCTCTCAGCAG	TCTCTTGGGGATCATTCTCG
Chr08	172.9	GMES2829	GMES2829_F	Chr08	45727519	45727538	GMES2829_R	Chr08	45727788	45727769	GGCCTTGAAAAATCATGCAC	ACAATCACAGAAATCGTGCG
Chr08	175.2	T000845100m	T000845100m_F	Chr08	45949698	45949720	T000845100m_R	Chr08	45949924	45949902	TTTGCTTTAGATCCCATACCTCA	AGGGAGTAGTGAAGCCTGAGTTT
Chr08	180.1	T000845306s	T000845306s_F	Chr08	46156506	46156528	T000845306s_R	Chr08	46156714	46156693	TAGTTCTTTGCACGATCATTTCC	GGCTATCTTGGAGCCGTTACTA
Chr08	186.3	s011900983-2	s011900983-2_F	Chr08	46913930	46913908	s011900983-2_R	Chr08	46913730	46913751	CAACCTTAGCCAAAGTAGGTTCC	GTTAGCAATGCTCCCTAACCAC
Chr08	189.8	GMES1414	GMES1414_F	Chr08	47210744	47210724	GMES1414_R	Chr08	47210485	47210504	CAAGCAAGAATTGGAATTGGA	AGAAGGATGCAGTGTGGCTT
Chr08	190.1	Satt429	Satt429_F	Chr08	47216205	47216229	Satt429_R	Chr08	47216468	47216441	ACCATCATCTAATCACAATCTACTA	TCCCCATCATTTATCGAAAATAATAATT
Chr08	193.1	T000846583l	T000846583l_F	Chr08	47432316	47432337	T000846583l_R	Chr08	47432667	47432649	ATACTCAATCCGGGCCTACAAT	TTTGGGTGAAATTAACGAT
Chr08	195.1	Satt378	Satt378_F	Chr08	47609912	47609889	Satt378_R	Chr08	47609752	47609773	TACAATGACGAGAGGAGAAGAGAC	TGAAACCACAAACAACAACAAC
Chr09	0	GMES0319	GMES0319_F	Chr09	253788	253808	GMES0319_R	Chr09	254051	254032	CGAAACACACGAATAGACACG	TGACAAGCCACCATTCATGT
Chr09	0.8	Satt715-2	Satt715-2_F	Chr09	376721	376698	Satt715-2_R	Chr09	376333	376355	ACGTGACTAACTAAATGACAAATCA	CGTGACCCACCCATTTCTCTTAT
Chr09	6	T000900767m	T000900767m_F	Chr09	767727	767749	T000900767m_R	Chr09	768059	768037	TTGTCAATGTTCTCCGTTCTACA	TTCTTGTGGATCGCTTCTAATTT
Chr09	6.1	C09-BARC-028004-06715	C09-BARC-028004-06715_F	Chr09	775250	775269	C09-BARC-028004-06715_R	Chr09	775315	775296	TGGGAACAGTTCCCATGTTG	ATAGGTGGCGGCATTAAAGG
Chr09	8.5	GMES1035	GMES1035_F	Chr09	1175143	1175124	GMES1035_R	Chr09	1174904	1174923	CATTGATCAGATGTGCCACC	AAAAACAGTTCCTCCCCCTC
Chr09	11.8	T000901542s	T000901542s_F	Chr09	1556370	1556394	T000901542s_R	Chr09	1556560	1556538	CAAAGACATATGCAATCAAGTAGCA	CTTCGATGAGACCTAAACGTCAA
Chr09	14.2	T000901811s	T000901811s_F				T000901811s_R				GGCTTGACATCAATAGTTCACAAA	CCAAATCAAATTATTACGATTGTT
Chr09	15	T000901942s	T000901942s_F	Chr09	1956860	1956884	T000901942s_R	Chr09	1957049	1957027	TCCATATAGCACATGTACTTGACTT	GAACGAGAGAGAAATGTCAGACG
Chr09	15.8	Satt242	Satt242_F	Chr09	2245610	2245587	Satt242_R	Chr09	2245421	2245444	TTGATCAGGTCGATTTTTATTTGT	AGTGCCAACTAACTACTTTTATGA
Chr09	16.6	Sat_119	Sat_119_F				Sat_119_R	Chr09	2399376	2399397	TAGGCTTTCAATTTGCAGAACT	GTTAGGTGTCCCAAGCAACTTA
Chr09	20	C09-BARC-044791-08808	C09-BARC-044791-08808_F	Chr09	2766984	2766965	C09-BARC-044791-08808_R	Chr09	2766921	2766939	TTCCAGATTTGGGAGATGGG	CATGCGGGTGCATTTGACA
Chr09	21.6	GMES1693	GMES1693_F	Chr09	2900979	2900959	GMES1693_R	Chr09	2900773	2900792	AAAAATCATTCATTCCCAGCC	GGATTCAGATTCGGGTGAAA
Chr09	22.1	C09-BARC-010523-00698	C09-BARC-010523-00698_F	Chr09	2967138	2967157	C09-BARC-010523-00698_R	Chr09	2967234	2967215	CTACTACAGTTTACCATCGG	CAATAATGACATAGTTAACA
Chr09	23.8	T000903106s	T000903106s_F	Chr09	3145423	3145445	T000903106s_R	Chr09	3145586	3145564	ATATTCTCTTGTGTGTGGCTCGT	ATGCTTCATTCAGTCTAGAGGCA
Chr09	25.2	GMES2329	GMES2329_F	Chr09	3356138	3356157	GMES2329_R	Chr09	3356275	3356258	TCGTGCAAGGACTTCTGATG	ACCACTTCGTATCATTTTCCA
Chr09	30.2	T000903912s	T000903912s_F	Chr09	3954338	3954360	T000903912s_R	Chr09	3954501	3954479	TATACTGCAGGTCTTTGCATGTG	GAATCAAGGGCACTCTTATGAAA
Chr09	31.3	s008602030	s008602030_F	Chr09	4205080	4205058	s008602030_R	Chr09	4204720	4204744	AGCAAGTCACAGTCCATTGTTTA	AAAGAAGCAATTGATTGTAGAGAGA
Chr09	32.9	s008601784	s008601784_F	Chr09	4453376	4453355	s008601784_R	Chr09	4453225	4453245	CCATCAAACCACTCTCCAGAAG	GCGGTGAGAAGGAACAATACA
Chr09	33.4	C09-BARC-041991-08151	C09-BARC-041991-08151_F	Chr09	4557685	4557704	C09-BARC-041991-08151_R	Chr09	4557777	4557758	GGGTTTCGCTTTATTGGTTG	GGGACAAGGGAGAAAAAAGC
Chr09	35.5	s008601429	s008601429_F	Chr09	4809297	4809275	s008601429_R	Chr09	4809124	4809146	TTCGACCATAGCTTAGATTTGTG	GGATCGAATCCATAGCATCATTA
Chr09	36.2	s008601107-2	s008601107-2_F	Chr09	5121281	5121254	s008601107-2_R	Chr09	5121083	5121102	CAACTTGTTAATAGAAACTCTCTTTGGA	TCCCTCTAGGACAAGACATAGGA
Chr09	39.2	GMES4146	GMES4146_F	Chr09	5675176	5675157	GMES4146_R	Chr09	5675070	5675089	GCGATCTTTCGAAAAGCCTA	TGAAATTCATGCTGGAATCG
Chr09	44	GMES1010	GMES1010_F	Chr09	6046111	6046092	GMES1010_R	Chr09	6045995	6046014	GGAAGGGTTTGAAGGAAGGT	GGGACTTCCACTGCGTGTAT
Chr09	44.2	C09-BARC-026035-05233	C09-BARC-026035-05233_F	Chr09	6074953	6074972	C09-BARC-026035-05233_R	Chr09	6075042	6075023	AGATCGAAAGACCTGACCTG	ATGACCTGACTCGTTCCAGC
Chr09	44.4	s025200027	s025200027_F	Chr09	6149183	6149161	s025200027_R	Chr09	6148818	6148840	ATTAACCATTTGTTGGTGGTTCA	TTAATTTGCCCAATTTCTCTCTG
Chr09	46.2	C09-BARC-021491-04132	C09-BARC-021491-04132_F	Chr09	6551649	6551668	C09-BARC-021491-04132_R	Chr09	6551739	6551720	ATAAACACCAGACTGGCCAC	TCTAGCTCTATGTTGCTCTG
Chr09	47.6	Satt178	Satt178_F	Chr09	6912737	6912757	Satt178_R	Chr09	6912897	6912877	GGGAAAATTCTTTTCATATAGATG	GGGGTTGAGATATTTTGTTCATAC
Chr09	50.6	C09-BARC-015513-01990	C09-BARC-015513-01990_F	Chr09	7391650	7391669	C09-BARC-015513-01990_R	Chr09	7391748	7391729	GGTTACACCACTAAGGTGTC	GTCACTGTAGTAGAGACTCA
Chr09	51.4	C09-BARC-043033-08504	C09-BARC-043033-08504_F	Chr09	7994015	7994034	C09-BARC-043033-08504_R	Chr09	7994100	7994081	ACCATTTGCAGTTTTTTGGG	ATGCTAAAACCGATGGGCTG
Chr09	51.4	Satt555	Satt555_F	Chr09	8020600	8020584	Satt555_R	Chr09	8020334	8020354	GTTGGCTTTGATGATGT	TTACCGCATGTTCTTGGACTA
Chr09	52.5	C09-BARC-041083-07904	C09-BARC-041083-07904_F	Chr09	8810069	8810050	C09-BARC-041083-07904_R	Chr09	8809982	8809999	ACAAGAGGCCAATTTGTCCC	TGCTTGCTTGTGTAGAATGC
Chr09	53	C09-BARC-042003-08157	C09-BARC-042003-08157_F	Chr09	9898684	9898665	C09-BARC-042003-08157_R	Chr09	9898592	9898610	AGTTGTCTTGCACTAGTTGG	CTAGATCTCTCACAATGACC
Chr09	53.6	GMES1323	GMES1323_F	Chr09	10568065	10568046	GMES1323_R	Chr09	10567885	10567904	TCCATCTTCCCCATCATCTC	GGACTAAAATAGGGGGCAGC
Chr09	53.6	Satt441	Satt441_F	Chr09	11224401	11224379	Satt441_R	Chr09	11224120	11224139	AAACCCACCCTCAAAAATAAAAA	AAATGCACCCATCAATCACA
Chr09	54.6	C09-BARC-014761-01655	C09-BARC-014761-01655_F	Chr09	12675034	12675015	C09-BARC-014761-01655_R	Chr09	12674950	12674969	AATCAGGTGGGTGTCTTCAG	AAGCCCCCTGTTAAGAAACC
Chr09	54.9	Sct_196	Sct_196_F	Chr09	12797131	12797113	Sct_196_R	Chr09	12796877	12796895	GGTCGAAGGTAGGGATTTA	GATGGATCTATGTTCAGAA
Chr09	55.2	s032000015	s032000015_F				s032000015_R	Chr09	18245857	18245832	TGAGTGTGGGTAGTCCAAGAAAT	GAAAGGTATACAGGTAAACATATTGG
Chr09	55.2	s005900863-2	s005900863-2_F	Chr09	19202176	19202196	s005900863-2_R	Chr09	19202325	19202308	AGAATGGCTCAAGGAGGTGTT	CCCTTCCTTTCTGGGTCC
Chr09	55.2	C09-BARC-042823-08431	C09-BARC-042823-08431_F	Chr09	19421778	19421759	C09-BARC-042823-08431_R	Chr09	19421680	19421699	ACAAAAGCCAATGACATGAC	AGAGAACACAGGAGGTAAGG
Chr09	56	C09-BARC-029275-06135	C09-BARC-029275-06135_F	Chr09	22065774	22065756	C09-BARC-029275-06135_R	Chr09	22065691	22065710	GGCTACAATCATCTTAAAC	GTTCTGTTCCATAGAACTTC
Chr09	57.6	GMES0973	GMES0973_F	Chr09	29228525	29228544	GMES0973_R	Chr09	29228812	29228793	CAGCACCGTAATGTGGTGAG	TTTTTATGGGTGGCTTCTGG
Chr09	61.9	T000931476m	T000931476m_F	Chr09	34101334	34101356	T000931476m_R	Chr09	34101639	34101617	ATTTGTGCTTCAAGGCTAACTCA	CAAGCATATTACAGGGATCCAAA
Chr09	62.7	LFsoy1	LFsoy1_F				LFsoy1_R	Chr09	35651844	35651824	GTACTTCTGGATCTGTCACAG	CTCATTTCCCATCGAGCAACC
Chr09	65.6	GMES5601	GMES5601_F	Chr09	37428467	37428448	GMES5601_R	Chr09	37428109	37428128	CCAAATCAGCTTCAGTGCAA	AACCCGTTAAATACACGCCA
Chr09	67.3	Satt559	Satt559_F	Chr09	37762468	37762489	Satt559_R	Chr09	37762771	37762750	ATTCGAAATATTAGTCAAACAA	CGAGCATATAGTCGGTAAAGTT
Chr09	71.5	Satt273	Satt273_F	Chr09	38799180	38799161	Satt273_R	Chr09	38798908	38798931	CCTGATTACATTATCGCTTA	GCCTTTCGTTCTCAAACTGAGAGT
Chr09	72.9	C09-BARC-021551-04138	C09-BARC-021551-04138_F	Chr09	38943196	38943177	C09-BARC-021551-04138_R	Chr09	38943102	38943121	TGTCTCTGAACTTTTTGAGC	GCTGTAGTAAACTAACTTAG
Chr09	74.8	T000936837l	T000936837l_F	Chr09	39409517	39409539	T000936837l_R	Chr09	39409866	39409848	GTACAGGCTGCACAAACACAAAT	AAAGCACCTGGGAGCAGAG
Chr09	76.4	s000501043-2	s000501043-2_F	Chr09	39879363	39879340	s000501043-2_R	Chr09	39879176	39879198	CCACGTGCCAATAATATCTATCTC	ATAGCACAATAGGTAGGTGTGGG
Chr09	77.5	s000500658-2	s000500658-2_F	Chr09	40292169	40292147	s000500658-2_R	Chr09	40291855	40291874	TTGATGTGATATACAACGAGTTT	TGAGCTCAACATTAAGCCAT
Chr09	81.2	Satt499	Satt499_F	Chr09	40583101	40583081	Satt499_R				GCAGAGATAATTGTATTTTTG	CTGCCCACTAGGGAACGAAAGATGA
Chr09	81.8	s000500003-2	s000500003-2_F				s000500003-2_R				TGACTTATGCAATAACAACAGCG	CACATGTGTTTGGTTTACAATA
Chr09	85.6	s003005833-2	s003005833-2_F	Chr09	41351159	41351181	s003005833-2_R	Chr09	41351343	41351320	TCCATATAAAGTATAGCTCGGAA	TGGATGACATCTGTGTACATTTGA
Chr09	88.1	C13-BARC-044609-08740	C13-BARC-044609-08740_F	Chr09	41745058	41745039	C13-BARC-044609-08740_R	Chr09	41744963	41744982	GAGTGATGCACTAAAGTTTC	GGATTAAAATGATGGAACTG
Chr09	88.9	s001302387.1	s001302387_F	Chr09	41791652	41791669	s001302387_R	Chr09	41791753	41791731	CCACCGACGTGTCGCACGATGAGAGGTAGGCACAACTCC	ATCAGATTCTCGATCAATTCTTT
Chr09	90.2	Satt260	Satt260_F	Chr09	42407488	42407466	Satt260_R	Chr09	42407266	42407288	CCAAATGTATACTTTAAATTCTT	GGTTTAGCTAAAATAGTTCGTGC
Chr09	90.5	GMES2537	GMES2537_F	Chr09	42452635	42452651	GMES2537_R	Chr09	42452907	42452888	CAAGTTCAAATGCAGAGGCA	TATCTGCTGCTGCTGCCTAA
Chr09	94	GMES2511	GMES2511_F	Chr09	42934203	42934222	GMES2511_R	Chr09	42934319	42934304	CACGAAAAATCATCCACCCT	GCACCCATGATTCTCCTGTT
Chr09	97.5	T000940539l	T000940539l_F	Chr09	43215354	43215376	T000940539l_R	Chr09	43215731	43215709	TCGCTTCTCTCGTATCTTTATCG	TCGTCACCTAACCGAACAGTAGT
Chr09	98.5	s013801912-2	s013801912-2_F	Chr09	43386811	43386789	s013801912-2_R	Chr09	43386693	43386718	TTACAATTATCAGACGCAAGCAA	TGACAGATCTCCATACATAATTGAAA
Chr09	100.4	T000941057s	T000941057s_F	Chr09	43769933	43769956	T000941057s_R	Chr09	43770043	43770021	AACTTTGTGCATCCTTCTTAATTT	CAACTATTAGGTGTCCTCACAAA
Chr09	105.2	GMES1553	GMES1553_F	Chr09	44315360	44315342	GMES1553_R	Chr09	44315155	44315174	TTGATAATGTCGTCGGCGT	AGCATCTTGAAAATCGGGTG
Chr09	109.3	T000941863l	T000941863l_F	Chr09	45057175	45057197	T000941863l_R	Chr09	45057521	45057499	TTAAGTGTTTAGATGGGTGCTTC	TAGTCTGGTTTGCTTGATATCGC
Chr09	112.3	s013800540-2	s013800540-2_F	Chr09	45243714	45243692	s013800540-2_R	Chr09	45243515	45243537	CAAATTAGTGTGATAAGGCATAA	TCTGGATATTGTAAAGGGATTCA
Chr09	113.1	GMES0221	GMES0221_F	Chr09	45646083	45646102	GMES0221_R	Chr09	45646250	45646231	TTTGAGCAGAGGAGGAGGAG	ACGAGGGAGTCCGGTACTTT
Chr09	113.4	C09-BARC-045189-08902	C09-BARC-045189-08902_F	Chr09	45709316	45709335	C09-BARC-045189-08902_R	Chr09	45709395	45709376	AATGGAATAGGAGGAGGAGG	TTGATGTCGACTTCGAGGAG
Chr09	116.7	Satt196	Satt196_F	Chr09	46513953	46513977	Satt196_R	Chr09	46514144	46514121	TTGGGAAATAGTGATTGAGGTAAAA	AAATCCCCATTGAATGAGAATAAG
Chr09	116.7	`4-8	`4-8_F	Chr09	46519265	46519287	`4-8_R	Chr09	46519331	46519309	GTGGTTTCACACCTTCTATGTGA	CCTCCACACTGCAAAACACTAAA
Chr09	118.6	GMES0633	GMES0633_F	Chr09	47017069	47017088	GMES0633_R	Chr09	47017238	47017219	GCCTGTGGTTGGTCTTCATT	AAAACCATATGCTTGCGGAC
Chr09	119.9	C09-BARC-042081-08175	C09-BARC-042081-08175_F	Chr09	47193795	47193815	C09-BARC-042081-08175_R	Chr09	47193885	47193867	CGTGAAAACATAAAAGATGAG	CATTTTCCTTTATGAGGAG
Chr09	121.8	GMES1280	GMES1280_F	Chr09	47438286	47438267	GMES1280_R	Chr09	47438032	47438051	TTGCAATGGAATCAATCAGG	CATGCAGGCAGCAACTTAAA
Chr09	126	C09-BARC-031123-07000	C09-BARC-031123-07000_F	Chr09	48171225	48171206	C09-BARC-031123-07000_R	Chr09	48171144	48171163	TGATGAAGTTTAGTGAGGGC	GGTCTTCTAGCCACTGTAAG
Chr09	126.2	GMES0083	GMES0083_F	Chr09	48182472	48182453	GMES0083_R	Chr09	48182248	48182267	TGTGGAGTTTACCTCTGGGG	AAGTGGCACTCATCCCAAAC
Chr09	127.6	Satt588	Satt588_F	Chr09	48618067	48618046	Satt588_R	Chr09	48617941	48617963	GCTGCATATCCACTCTCATTGACT	GAGCCAAAACCAAAGTGAAGAAC
Chr09	128.8	GMES6570	GMES6570_F	Chr09	48843470	48843489	GMES6570_R	Chr09	48843750	48843731	TTGCGTTTGTCACCACTCTC	CCGTTCAGAAAAAGACCCAA
Chr09	129.7	T000945908s	T000945908s_F	Chr09	49104114	49104135	T000945908s_R	Chr09	49104280	49104261	AATTCATATTGGGTGATGCAGAG	AATATATCAGAGTTGGCAAAGGG
Chr09	129.7	T000946473s	T000946473s_F	Chr09	49675948	49675970	T000946473s_R	Chr09	49676151	49676126	CGATTTGCATCGTATGAAGATTT	GAATGGATTAGAAAGATTATCACTGG
Chr09	131.3	T000946713s	T000946713s_F	Chr09	49918247	49918274	T000946713s_R	Chr09	49918448	49918428	CCAAATTATCACATTTATTTGTATCTTC	AGTCAAATTGAATGGCTTCAG
Chr09	131.6	C09-BARC-029231-06131	C09-BARC-029231-06131_F	Chr09	50019002	50019021	C09-BARC-029231-06131_R	Chr09	50019078	50019059	GGTAAATCTGGTGTAGGTGG	CTTGTGTGGATTCTCTTGGC
Chr09	131.6	T000946842l	T000946842l_F	Chr09	50047159	50047183	T000946842l_R	Chr09	50047583	50047560	GGAATACTATTGACTGGAATATAAA	GATGTTTGACTCATGGAATCTTGA
Chr09	131.9	s032300008	s032300008_F	Chr09	50067403	50067430	s032300008_R	Chr09	50067861	50067837	TCATTATTACAACATTACTAAAGTGAGA	GGTTATGTCTAGCATAGCTTTATTT
Chr10	0	Sat_196	Sat_196_F	Chr10	174815	174794	Sat_196_R	Chr10	174595	174619	AAACGAGATACTAGGATTTTGACTT	AGCCTTAGGAGTAGTTAATGATGAT
Chr10	2.8	T001000586m	T001000586m_F	Chr10	580259	580285	T001000586m_R	Chr10	580552	580530	TGATGAATTTGAATTAGCTTAAGTGAG	AGTATAGAGCCGTGAGATTGTTT
Chr10	4.1	s016700850-2	s016700850-2_F	Chr10	847622	847644	s016700850-2_R	Chr10	847820	847796	AAATTCCAACAACATGCAGATTC	GAAATAGTGTACAACATCAATCAAA
Chr10	5.8	C10-BARC-017663-03094	C10-BARC-017663-03094_F	Chr10	967582	967601	C10-BARC-017663-03094_R	Chr10	967668	967649	GCCACTGGTAAATATTGCTC	GTAGGTGAGAATGAGTGACG
Chr10	6.4	T001001023s	T001001023s_F	Chr10	1018560	1018582	T001001023s_R	Chr10	1018748	1018726	AAGCAGAGTGCGGAGTAATTAAA	TAGCTGTGCGCTTTATGTAACAA
Chr10	6.9	T001001120s	T001001120s_F	Chr10	1115240	1115262	T001001120s_R	Chr10	1115452	1115428	GGTAAACCACCATCCTAGGAGAC	TGATGATGATAGTGAAGCTATGCAG
Chr10	7.7	T001001269l	T001001269l_F	Chr10	1264436	1264458	T001001269l_R	Chr10	1264801	1264779	CCAGGTCAAACTGTATTCCACAT	CTTCCTCTCTAAGAGGCTGCAAT
Chr10	11.3	Satt487	Satt487_F	Chr10	1395586	1395606	Satt487_R	Chr10	1395789	1395767	ATCACGGACCAGTTCATTTGA	TGAACCGCGTATTCTTTTAATCT
Chr10	15.7	T001001797s	T001001797s_F	Chr10	1801391	1801408	T001001797s_R	Chr10	1801600	1801580	CGTTGACACGTGATTGAT	CTCATGAGGCCTAACAATAAT
Chr10	18.4	T001002109l	T001002109l_F	Chr10	2115862	2115884	T001002109l_R	Chr10	2116227	2116202	CAAGCTCGAAGAGACAAATGTTA	TTTGTTTATCTATCCATCCTATATGT
Chr10	21.1	C10-BARC-029811-06423	C10-BARC-029811-06423_F	Chr10	2376804	2376785	C10-BARC-029811-06423_R	Chr10	2376732	2376751	TTCAATCTTTCTGAGCAGCC	ATCATATGTTCTGGAGGCCC
Chr10	21.2	s012400988-2	s012400988-2_F	Chr10	2379362	2379384	s012400988-2_R	Chr10	2379553	2379532	AATTCAGAGATTATACGGAATTG	AAAGCATGACATTCTCAAACATA
Chr10	23	GMES0676	GMES0676_F	Chr10	2563033	2563014	GMES0676_R	Chr10	2562788	2562807	CGAGCCTCACGCTTAAACTC	TTACGAGCAACTGTATGGCG
Chr10	23.9	Satt445	Satt445_F	Chr10	2662346	2662363	Satt445_R	Chr10	2662545	2662527	CATTGCATCGAATTATTA	TTGGAATTTGTGATTGACA
Chr10	24.9	GMES2487	GMES2487_F	Chr10	2814424	2814405	GMES2487_R	Chr10	2814207	2814226	TATCCTGGGTTGTAGGGTGG	TCCATTTGCTAGGTATCGGC
Chr10	24.9	GMES6337	GMES6337_F	Chr10	3019080	3019099	GMES6337_R	Chr10	3019376	3019357	AGGCAAAGGGGTTTGAGTTT	CCTTCCTTGAAGAAGCCTCC
Chr10	29.3	T001003390s	T001003390s_F	Chr10	3397765	3397786	T001003390s_R	Chr10	3397971	3397948	GGTGAAGTTGAGGATTGGTTTC	TGTCTAACACTGTTGTAACTTTGG
Chr10	32.9	GMES4797	GMES4797_F	Chr10	3838856	3838875	GMES4797_R	Chr10	3839267	3839248	ACAAACACAAGAACCCCAGC	TTCTTTGAGACGGGAATTGG
Chr10	36.2	C10-BARC-040995-07876	C10-BARC-040995-07876_F				C10-BARC-040995-07876_R	Chr10	4244683	4244664	GGGTTTTGCTTAGGGCAATT	TTTAAGGTGTATCCCCTTAC
Chr10	36.7	GMES1066	GMES1066_F	Chr10	4375117	4375098	GMES1066_R	Chr10	4374837	4374856	GCCAAATTTACGTGCTTTGC	ACGCCTAAAACCAAGAGTCG
Chr10	37.8	T001004527s	T001004527s_F	Chr10	4543294	4543316	T001004527s_R	Chr10	4543479	4543454	AGGGAGATGATGATACGAAGAAA	CCTACTGTGTGTTATTTAAGGGATGA
Chr10	37.8	T001004548m	T001004548m_F	Chr10	4563478	4563500	T001004548m_R	Chr10	4563689	4563667	AAATCCATTATTTCCCTCCATTT	TTGCAACACATTAAGCAGTGAGT
Chr10	40.1	T001004836m	T001004836m_F	Chr10	4853956	4853980	T001004836m_R	Chr10	4854214	4854192	CATTTGAATATAACCCTTCGATCTC	CTATTCCTACTCATTTGGACGGA
Chr10	42.3	Satt347	Satt347_F	Chr10	5059709	5059692	Satt347_R				CGCTTCCATTTTAAAGTA	GTCACCGTTGTATACCTA
Chr10	46	s022500055-2	s022500055-2_F	Chr10	5442533	5442557	s022500055-2_R	Chr10	5442851	5442829	TTTCCTCCTTTGTTTATATGTGTTT	GTTATTGTTTCCTTCTGCATTCG
Chr10	47.2	s022500108-2	s022500108-2_F	Chr10	5496300	5496323	s022500108-2_R	Chr10	5496516	5496494	TTTAGTTCCTACTGCCATAACTCA	TTCTCAAACGTTCTTTGCTTAGG
Chr10	48.5	s022500586-2	s022500586-2_F	Chr10	5972913	5972935	s022500586-2_R	Chr10	5973311	5973288	AGTATGTCACTCCCACCTTGTTT	AAATTCACGGAAAGGTCATATCAT
Chr10	49.7	s029400110	s029400110_F	Chr10	6163955	6163977	s029400110_R	Chr10	6164137	6164115	CAAATATTTCAGCAACCATTTGA	ATGGAGTTGATCTTTGATGATGG
Chr10	50.5	s026100018	s026100018_F	Chr10	6285251	6285276	s026100018_R	Chr10	6285620	6285598	TCTTCTACAAGGATACCTATAATTCA	TATTCATTTCTAGCTAGGTGCGG
Chr10	52.1	T001006551s	T001006551s_F	Chr10	6578105	6578127	T001006551s_R	Chr10	6578314	6578292	CCATCCCTACTTACATGGCATAC	TGGAAAGTCTTGGCTAAACAATG
Chr10	56	GMES1523	GMES1523_F	Chr10	7133205	7133224	GMES1523_R	Chr10	7133468	7133449	CAAACGGAACCGTAATCGTT	CTTCTTGCTCCTTCAAACGG
Chr10	57.8	s032900010	s032900010_F	Chr10	7236243	7236265	s032900010_R	Chr10	7236690	7236665	TGGATTGTGATTAGATGATGCTG	CATGAAATGGTATGGAGTATTTCTTT
Chr10	58.5	s018300465r	s018300465r_F	Chr10	7860352	7860373	s018300465r_R	Chr10	7860746	7860726	TGGTCGACTCTTTAATTTCCTTG	AAACGATAGGAGAGAGAAGGTGT
Chr10	59.2	Sat_221	Sat_221_F	Chr10	9817808	9817832	Sat_221_R				CCCTAAAATGGAGTAAAATGGAAGA	AAAGGAGCTAACTCAGTTGATTGA
Chr10	59.3	C10-BARC-042707-08378	C10-BARC-042707-08378_F	Chr10	10143798	10143779	C10-BARC-042707-08378_R	Chr10	10143728	10143747	GATTTGAACATTCCACTCAC	CAACATACACTGAGTGAAGG
Chr10	59.6	s012201678-2	s012201678-2_F	Chr10	10179150	10179172	s012201678-2_R	Chr10	10179298	10179279	TAAATTTGGTCCACTGGCTAAGA	CAAGACCGGATTTCGATCAG
Chr10	59.6	s020900037-2	s020900037-2_F	Chr10	11570823	11570845	s020900037-2_R	Chr10	11570961	11570943	GACGTGACACACGAATAAGAACA	AAATTCACATGCGCCAATC
Chr10	59.6	s019800659-2	s019800659-2_F	Chr10	11902673	11902651	s019800659-2_R	Chr10	11902478	11902501	CTAGAGCCTGCAGAGGTATTACG	GGATAATTTCAGGGACAGACACTC
Chr10	60.4	s019800028	s019800028_F	Chr10	12526953	12526931	s019800028_R	Chr10	12482164	12482186	CATGCTAATTGAGGGCTAAACAC	TTTAGCAATTTGTTCATGTCCTG
Chr10	60.4	Sat_291	Sat_291_F	Chr10	12724545	12724518	Sat_291_R	Chr10	12724232	12724258	ATGTGTGCAGGAATTAAATATATCAATA	AAGCCACAAAAATTAAGAATATAAAGC
Chr10	61.2	Satt633	Satt633_F	Chr10	12960308	12960331	Satt633_R	Chr10	12960438	12960415	GGGACACTATCGGCCTAGAAAGTT	GGGTGATAAAGTTCCCCCTCTAAG
Chr10	61.4	C10-BARC-040251-07694	C10-BARC-040251-07694_F	Chr10	16543548	16543567	C10-BARC-040251-07694_R	Chr10	18079953	18079972	GGAAACAAAGAGGCAAAAGG	CAGTCTGGAGGTAGTATATG
Chr10	61.7	s007900046	s007900046_F	Chr10	19052129	19052153	s007900046_R	Chr10	19052486	19052468	TTTCACAATCATATTAATGCACGTT	TTAGCATTCCTAATTAAGGGCAA
Chr10	61.7	GMES0208	GMES0208_F	Chr10	23948733	23948714	GMES0208_R	Chr10	23948345	23948364	TTCTCTCGGAGCCGCTATTA	GGAACTCCAGGAGAGGGAAC
Chr10	62.2	GMES0587	GMES0587_F	Chr10	28940120	28940101	GMES0587_R	Chr10	28939888	28939907	TCATCAACATTTTCTGCCCA	GTCAACCTCGACCTCAGAGC
Chr10	62.3	s027000323.1
Chr10	63	GMES0684	GMES0684_F	Chr10	32584837	32584814	GMES0684_R	Chr10	32584684	32584703	TGACTCACACACACACTCTCTCTC	GAGCTGGCTCACCTTCAGTC
Chr10	63	Satt241	Satt241_F	Chr10	33310335	33310357	Satt241_R	Chr10	33310577	33310555	CTTGGTCTAAGAAAACTTTTGGT	GGGGGTTTTATCTCTTAAATGTG
Chr10	63.8	Satt262	Satt262_F	Chr10	36042564	36042546	Satt262_R	Chr10	36042318	36042337	CCCCATTAATGTTAACACA	GAGTTCAACGCATTCACCTT
Chr10	63.8	Satt473	Satt473_F	Chr10	36113531	36113506	Satt473_R	Chr10	36113274	36113299	ATCTCGACCTAGTTGTCCATGTTCAA	CGAGAGTTGCTAACTTTAGGATAGTG
Chr10	63.8	T001036463s	T001036463s_F	Chr10	36988423	36988445	T001036463s_R	Chr10	36988615	36988593	TTTAAAGGATTAGTCTTCGATCA	ATGATTGATCAACGAGTACCAAA
Chr10	66.9	T001036990s	T001036990s_F	Chr10	37515880	37515900	T001036990s_R	Chr10	37516089	37516067	CTCAGCCCATGGGTTATTCTT	ACGGATGGACCTTACAGATTGTT
Chr10	70.6	T001037597l	T001037597l_F	Chr10	38120184	38120206	T001037597l_R	Chr10	38120560	38120538	GAATGGAATTAATCTGGTCAGCA	TCTTTACACAAGGAAGGGATGAG
Chr10	74.6	s020800013-2	s020800013-2_F	Chr10	38648445	38648468	s020800013-2_R	Chr10	38648627	38648605	TGTAAGTCACAATTGAATGACTAT	ATGGTGAATTGGTGAAACAAATG
Chr10	79	T001038587s	T001038587s_F	Chr10	39133706	39133728	T001038587s_R	Chr10	39133903	39133876	ACATTCATGCAGGAAATTGACTT	TTAGACTTATATTCGGTATAATTAGAAG
Chr10	81.1	GMES4351	GMES4351_F	Chr10	39349454	39349432	GMES4351_R	Chr10	39349262	39349281	TGGATGAAAGAAAGTAAAAGGGA	CGGGTGCAGAAATGAGAAAT
Chr10	81.2	GMES0051	GMES0051_F	Chr10	39389635	39389616	GMES0051_R	Chr10	39389462	39389481	CTTTCATGTGCCGAGTCAGA	AGCACTGGATGAGTCCAACC
Chr10	81.2	GMES4281	GMES4281_F	Chr10	39423407	39423388	GMES4281_R	Chr10	39423303	39423322	CTCCCATGGAATCCGATCTA	CGTCGTAGTCCTCTTCGTCC
Chr10	82.8	s014200002	s014200002_F	Chr10	39469090	39469112	s014200002_R	Chr10	39469403	39469381	CATTGCATGAGTTCTTACACTAA	ACATTCGCAGGAACTGATCTTTA
Chr10	87.3	T001039320l	T001039320l_F	Chr10	39874736	39874758	T001039320l_R	Chr10	39875102	39875080	CACATTGATGCATTCCGTATTTA	GGAGAGGGCCTACTGTCACTTAG
Chr10	89.5	T001039788m	T001039788m_F	Chr10	40343799	40343821	T001039788m_R	Chr10	40344123	40344101	CTCTCTCACACGTACATGCACTC	AAACCTGAGGCTCTGACAATAAT
Chr10	91.1	T001039931l	T001039931l_F	Chr10	40488860	40488882	T001039931l_R	Chr10	40489225	40489203	GCCGCTTCATCTCCTAAGATAAT	GTTTGTGTCGTGTCCGTATCAAT
Chr10	91.4	C10-BARC-040653-07810	C10-BARC-040653-07810_F	Chr10	40541834	40541853	C10-BARC-040653-07810_R	Chr10	40541911	40541893	ACCTCCACTGAATCAATGCC	TGGCACAAAATAACAATGG
Chr10	93.3	T001040053s	T001040053s_F	Chr10	40610943	40610966	T001040053s_R	Chr10	40611109	40611087	TTCAATGAATTGCGTTATCAATTT	CGAACGAAAGATAAACGTTACGA
Chr10	95.7	T001040189s	T001040189s_F	Chr10	40746859	40746881	T001040189s_R	Chr10	40747048	40747026	ATATCCTTATTCCAACCCAATCG	TTGGTTGACGTCTGTAACACAAC
Chr10	97.1	T001040621s	T001040621s_F	Chr10	41152794	41152816	T001040621s_R	Chr10	41152993	41152971	AAGTTGGTACTACTGGCACCTTA	AATCCTTGCGGTATTGTTTCATA
Chr10	98.4	GMES4216	GMES4216_F	Chr10	41456897	41456878	GMES4216_R	Chr10	41456652	41456671	CTCAACATTCCCAAAGCCAT	TCTGCTTGTTTCCCCATGAT
Chr10	99	s022600649-2	s022600649-2_F	Chr10	41690742	41690726	s022600649-2_R	Chr10	41690593	41690612	AAGATGCAGCCTTTGGG	TAATTTGTGTGGGAATTGAAA
Chr10	101.1	s022600099	s022600099_F	Chr10	42244715	42244693	s022600099_R	Chr10	42244392	42244415	TTGTTGTTATCCTCATCCTCGTC	CAAACTTAATATTGTTTACGGTTT
Chr10	101.1	C10-BARC-032641-09002	C10-BARC-032641-09002_F	Chr10	42293798	42293779	C10-BARC-032641-09002_R	Chr10	42293720	42293739	GGAACAAAGCATTGAACCAC	TCCTCGTAGCAGTTGAGTTG
Chr10	101.9	s021600511	s021600511_F	Chr10	42631602	42631580	s021600511_R	Chr10	42631258	42631280	TTAGGCGCGTAGAATGTGTTTAC	AGGCAGATGAAGCTTTAAGTCGT
Chr10	104.4	T001042474m	T001042474m_F	Chr10	43038110	43038133	T001042474m_R	Chr10	43038449	43038426	TTTAGTTCAGCGGCCTATTTATTT	GCTTTACCAAAGACTAACTCTTCA
Chr10	106.5	GMES1511	GMES1511_F	Chr10	43382903	43382922	GMES1511_R	Chr10	43383199	43383180	GGATGCTTACCCACCAGAGA	CGGACCAATTAAGAAGGCAA
Chr10	107.6	s030100085r	s030100085r_F	Chr10	43513779	43513801	s030100085r_R	Chr10	43514148	43514125	GACCGGAAAGAGTGCAATTACTA	AAAGTATTTCATAAATGGAGTGAT
Chr10	108.2	s030100090	s030100090_F	Chr10	43519190	43519212	s030100090_R	Chr10	43519357	43519334	TTGCACTCCAGTATTTGATGTTG	TGAATTCTCAAATTAAACTTTCCA
Chr10	110.3	Satt331	Satt331_F	Chr10	44029661	44029682	Satt331_R	Chr10	44029901	44029885	GCAGAGTCCCCCCTAAATATAG	CGGGAACAACCACACTCTCCATT
Chr10	112.2	C10-BARC-031677-07213	C10-BARC-031677-07213_F	Chr10	44420460	44420440	C10-BARC-031677-07213_R	Chr10	44420365	44420385	CACACATTTTAATGTGTCTTG	GGATTTTTTTCCTCTTCCATC
Chr10	113.3	Satt581	Satt581_F	Chr10	44712637	44712615	Satt581_R	Chr10	44712503	44712527	CCAAAGCTGAGCAGCTGATAACT	CCCTCACTCCTAGATTATTTGTTGT
Chr10	115.5	T001044400l	T001044400l_F	Chr10	44975706	44975728	T001044400l_R	Chr10	44976048	44976025	GTTGAGGACATATTATTGCCGAT	CCATGCATATCCTATAGCTTGTTG
Chr10	118.4	C10-BARC-015925-02017	C10-BARC-015925-02017_F	Chr10	45329812	45329792	C10-BARC-015925-02017_R	Chr10	45329716	45329736	CAAGGTACAAATTTAAATGCC	GTTAAAATGCGTATGTCATCC
Chr10	119	FT2-300H01d	FT2-300H01d_F	Chr10	45363142	45363161	FT2-300H01d_R	Chr10	45363558	45363539	GTGGATGTGCGTGAGAAATG	GCCATATTGGGCTGGTGTAT
Chr10	122.6	s005205820-2	s005205820-2_F	Chr10	45770392	45770370	s005205820-2_R	Chr10	45770242	45770259	TGTCCTCAAATCCGTACATACAT	CCCATTTCCTTTCGACCC
Chr10	127.1	T001045537m	T001045537m_F	Chr10	46107025	46107047	T001045537m_R				ATATTGGCCGCCTAATCTTTAAT	CTCACCCTCTCTTATGTGGATTG
Chr10	127.4	s005205185-2	s005205185-2_F	Chr10	46394754	46394732	s005205185-2_R	Chr10	46394379	46394401	ACATCTCAAGCTGATTCCGATAA	TAGGATTCTAATTGTTCCCGGTT
Chr10	127.9	C10-BARC-028651-05984	C10-BARC-028651-05984_F	Chr10	46490778	46490759	C10-BARC-028651-05984_R	Chr10	46490697	46490717	CTACCTGTACACACTCTTGG	GGTTCATATGACTTTTCTGAG
Chr10	129	Satt243	Satt243_F	Chr10	46656439	46656417	Satt243_R	Chr10	46656244	46656267	CATTGCACATTAGGTTTTCTGTT	GTAAGATCACGCCATTATTTAAGA
Chr10	129.3	s005204843-2	s005204843-2_F	Chr10	46734516	46734498	s005204843-2_R	Chr10	46734367	46734390	CAAGAAGCAAGGAACCAAA	AGTATGTCCATCATTGTAAGATTT
Chr10	134	alphaP	alphaP_F	Chr10	47494035	47494054	alphaP_R	Chr10	47494230	47494211	CAACCACCCCAATTTTGTTC	ATAATGTTGCGCTCGCTCTT
Chr10	135.3	s005203925-2	s005203925-2_F	Chr10	47639391	47639375	s005203925-2_R	Chr10	47639243	47639269	TGAACATACTTTAATACTGACTCAACTTC	TGTATATAGAAGATAATGAATTGATGG
Chr10	136.4	Sat_231	Sat_231_F	Chr10	47769294	47769270	Sat_231_R	Chr10	47769006	47769033	GTATGTTTAGTGAATAAATGACTCG	AGACTCATCCAACTATAATTTATCATAT
Chr10	138	138ct58	138ct58_F	Chr10	48248523	48248503	138ct58_R	Chr10	48248383	48248400	AGCTATCAGTATCTTATAAAC	GAGGCACATTGTTCTGGG
Chr10	138	GMES1692	GMES1692_F	Chr10	48319637	48319656	GMES1692_R	Chr10	48319848	48319829	ACCCTCCACAGGGAGGATAC	ATCAATCGATCTGAGTCGCC
Chr10	139.1	s005203017-2	s005203017-2_F	Chr10	48548104	48548082	s005203017-2_R	Chr10	48547771	48547793	CTCGAACGAGGAAGTAGAAACAA	TGCATCCATGATCCAACTAATAA
Chr10	139.1	GMES0397	GMES0397_F	Chr10	48624302	48624283	GMES0397_R	Chr10	48624152	48624176	TAACCACCAAAAGAGGACGC	GCATTTGCTTAGTAATGGCTATTGT
Chr10	139.9	GMES1727	GMES1727_F	Chr10	48784978	48784959	GMES1727_R	Chr10	48784683	48784702	GTGACGAAGGAAAGTGGGAA	ACGACGAGGCTGAGAGAGAC
Chr10	140.7	s005202718-2	s005202718-2_F	Chr10	48845174	48845152	s005202718-2_R	Chr10	48845066	48845092	TCCCTTCCTCTTTAATTTGCTTT	GAAGAGAAGACAGAACAGAGTATTTGA
Chr10	140.9	GMES2784	GMES2784_F	Chr10	48911095	48911075	GMES2784_R	Chr10	48910684	48910703	CGCATGCAGTTTCTTCTAACA	CGAAAACTTTTGACAACGCA
Chr10	140.9	GMES4774	GMES4774_F	Chr10	48911095	48911075	GMES4774_R	Chr10	48910838	48910857	CGCATGCAGTTTCTTCTAACA	AGGATCACATACCAGGCACC
Chr10	141.2	GMES1940	GMES1940_F	Chr10	49140497	49140516	GMES1940_R	Chr10	49140758	49140739	CCAATTCTTCCACCATCACC	CCAAGAGATGAGTTGCTGGC
Chr10	142.8	GMES4094	GMES4094_F	Chr10	49417614	49417633	GMES4094_R	Chr10	49417881	49417862	TCCTTGTCTGAAGATGCGTG	CTGACCCAGCAATGTCTTCA
Chr10	142.8	s005202072-2	s005202072-2_F	Chr10	49495942	49495920	s005202072-2_R	Chr10	49495551	49495578	ATTTATACTTCAAGGGTGCCTCA	GAATGTGTTAAAGTAAAGGATAAGATCG
Chr10	143.3	C10-BARC-024123-04768	C10-BARC-024123-04768_F	Chr10	49666014	49665994	C10-BARC-024123-04768_R	Chr10	49665915	49665934	CACAACCTTCGATCACAAATC	GGACAACTTACTTACCAAGG
Chr10	144.1	GMES4853	GMES4853_F				GMES4853_R	Chr10	49716083	49716102	CGAGTTCTCTTGAAAACGGC	TTCAGGGACCAAATGGAAAG
Chr10	144.1	GMES6346	GMES6346_F	Chr10	49741590	49741609	GMES6346_R	Chr10	49741689	49741665	TTAATCGTGCCGCTGAATTT	GAATATGATGTGCATGTATTCAAGT
Chr10	144.1	s005201780-2	s005201780-2_F	Chr10	49788416	49788393	s005201780-2_R	Chr10	49788031	49788053	AACTTTCACGTGATACATTATTTG	TAGTTTAAAGTGCATCATCGGGT
Chr10	146.3	s005201440-2	s005201440-2_F				s005201440-2_R	Chr10	50125455	50125481	GAGGGCGCATCCCTACT	TGAATCTTGTGTTTAGTCTCATGTCTT
Chr10	146.6	C10-BARC-017339-02269	C10-BARC-017339-02269_F	Chr10	50313537	50313556	C10-BARC-017339-02269_R	Chr10	50313625	50313606	GATAACTGTGTCACTAAGAG	GGCTGCATTCTTAGCTAGTC
Chr10	146.6	GMES0682	GMES0682_F	Chr10	50357214	50357233	GMES0682_R	Chr10	50357399	50357380	AGGGTTTCACACTTTGTCCG	ATCTGCGGATCCATCAAATC
Chr10	146.8	GMES5806	GMES5806_F	Chr10	50481805	50481786	GMES5806_R	Chr10	50481587	50481606	GTCGTTCGATGGTGATGATG	GATTGAAGTGAGCCCAAAGC
Chr10	146.8	s005201076-2	s005201076-2_F	Chr10	50489360	50489338	s005201076-2_R	Chr10	50488968	50488992	ATATCAGCCTTTGCACACTTGTT	TTCTCTCAATACTCTTGTCTTCTTT
Chr10	149.3	s005200757-2	s005200757-2_F	Chr10	50807814	50807792	s005200757-2_R	Chr10	50807674	50807698	CTTTCAGCTTTGAGGATTGTCAT	TCAACTTACATGTTGTACCAGTGTC
Chr10	152.3	s005200402-2	s005200402-2_F	Chr10	51162984	51162955	s005200402-2_R	Chr10	51162800	51162822	TGTACAACACTATTTATAGAATATACTCAG	AAGATAACTTAACAAACGCATAA
Chr10	154.2	s005200103-2	s005200103-2_F	Chr10	51462719	51462696	s005200103-2_R	Chr10	51462578	51462598	GGTTAGAGATATCCTCATCCTTGA	CTTTCTCACCCATGCTCTGTT
Chr10	154.7	GMES4153	GMES4153_F	Chr10	51485235	51485216	GMES4153_R	Chr10	51484950	51484969	TGTTCTGGAGTGGCAGTGAG	TGACACGATGGACGGTAGAA
Chr11	0	C11-BARC-017811-02392	C11-BARC-017811-02392_F	Chr11	29893	29874	C11-BARC-017811-02392_R	Chr11	29802	29821	GCAATGGAGCGAAGGTGTTG	AAACTGGCGCAAATGGCAAC
Chr11	0	GMES2425	GMES2425_F	Chr11	117378	117359	GMES2425_R	Chr11	117065	117084	AACAACAGGTCTTGGATGGC	AAGGTGCCATCAATCTGGAC
Chr11	0	GMES6342	GMES6342_F	Chr11	199191	199172	GMES6342_R	Chr11	198910	198929	ACGACCTATCTTGCGTGGTC	TGCAGAAATCCGCTCTCTTT
Chr11	0	BE806308	BE806308_F	Chr11	199129	199110	BE806308_R	Chr11	198911	198930	ATTTGACCCCGTTCATACAT	GCAGAAATCCGCTCTCTTTA
Chr11	0	C09-BARC-041591-08048	C09-BARC-041591-08048_F	Chr11	263448	263429	C09-BARC-041591-08048_R	Chr11	263355	263374	TCGTAAGCTAGGTCAAATCG	AGCAATAGTCTTCAATCGGG
Chr11	0.5	GMES3568.1
Chr11	4.1	GMES2514	GMES2514_F	Chr11	716352	716371	GMES2514_R	Chr11	716552	716533	AGCGGTGGAAGAGAGATGAG	CAAATCCAGAGGTTTCCCAA
Chr11	4.1	GMES0979	GMES0979_F	Chr11	1018401	1018382	GMES0979_R	Chr11	1018133	1018153	GGAGCTCCTACACCTTTGGT	GCTCGAATCTCAGTACGTTCC
Chr11	4.7	GMES0765	GMES0765_F	Chr11	1109005	1109024	GMES0765_R	Chr11	1109163	1109143	TGCTTGCTGCCTCTTATTCA	TGGCTATACGTGTGTGTGTGC
Chr11	8.7	s001001756-2	s001001756-2_F	Chr11	2012973	2012995	s001001756-2_R	Chr11	2013150	2013128	AAAGCATCTTATCTCTTCGCTAT	TGACGCAGGAACCAATATCTTAT
Chr11	11	T001102190m	T001102190m_F	Chr11	2197768	2197790	T001102190m_R	Chr11	2198094	2198072	TGTTTCTTATCGCTGCTTTCATT	CGATCTAGATTAGACAACGTGGC
Chr11	15.4	T001102495s	T001102495s_F	Chr11	2502535	2502557	T001102495s_R	Chr11	2502699	2502677	ACGCCAGTGTCGTATCGTATTAT	TGACTCTACCAAAGATACACGGG
Chr11	17	Sat_272	Sat_272_F	Chr11	2718834	2718853	Sat_272_R	Chr11	2719065	2719040	ATGGCAATATGTTTTTGAGC	GCCTTGTAATTTTCCTTGTTAATGTG
Chr11	19	T001103032l	T001103032l_F	Chr11	3038649	3038671	T001103032l_R	Chr11	3038955	3038932	CTTTGAGCTAAGCCGAATGAAGT	TTTGACATGCAAGTATATCCCTTT
Chr11	23.2	s005305357-2	s005305357-2_F	Chr11	3234326	3234304	s005305357-2_R	Chr11	3234180	3234202	GCCAAACTGTTCAACTTTAATGC	TCCACCTGGTTACTGATTGATTT
Chr11	25.1	s005305067-2	s005305067-2_F	Chr11	3524867	3524845	s005305067-2_R	Chr11	3524501	3524523	ATCCACAAACTTTCTTAATGACT	TCACCATATGCAACTCCTTTACA
Chr11	28.8	T001103887l	T001103887l_F	Chr11	3895547	3895569	T001103887l_R	Chr11	3895898	3895876	TCATAGCCTGAGCATTACACTGA	TATAGCGGAAGTCTCTGTTCCAG
Chr11	32.3	Sat_270	Sat_270_F	Chr11	4234163	4234142	Sat_270_R	Chr11	4233940	4233960	AAAGCACTTGGATGACACATAA	AGGGGTAGAGACTGGAGAGTA
Chr11	35	T001104672m	T001104672m_F	Chr11	4680917	4680939	T001104672m_R	Chr11	4681207	4681185	GTCCATTCGTTGACTCAATAACC	TTTACCTGATGATACTTACGGGC
Chr11	36.9	GMES6228	GMES6228_F	Chr11	4958019	4958039	GMES6228_R	Chr11	4958221	4958202	AAGGAGGAACAAGGAGAAGGA	CAAAGCTGTTCCTGTGGCTT
Chr11	39.7	C11-BARC-030509-06888	C11-BARC-030509-06888_F	Chr11	5376621	5376640	C11-BARC-030509-06888_R	Chr11	5376698	5376679	TCTGTGGTGAGTTGAGGAAG	AAACACACAGCAACGCTATC
Chr11	41.7	GMES1998	GMES1998_F	Chr11	5688235	5688216	GMES1998_R	Chr11	5688056	5688075	TTGCTGCTAGGAGGACTGGT	TGGCAGAAATGGTGATCAAA
Chr11	42.2	GMES4577	GMES4577_F	Chr11	6058425	6058445	GMES4577_R	Chr11	6058681	6058662	TCCTCTCTCTTCTTCTGCTGC	TACTTTCCAAACTCGCCAGC
Chr11	42.2	GMES0823	GMES0823_F				GMES0823_R	Chr11	6080677	6080696	CAAACTGAAGACGCTGGTCA	GGAGTCTAGCCACAGCCTTG
Chr11	42.7	GMES0045	GMES0045_F	Chr11	6203264	6203283	GMES0045_R	Chr11	6203452	6203433	TGAGAACGCGCTAACTGCTA	TAAGAGCGAAAGGCGTTGTT
Chr11	42.7	Satt509	Satt509_F	Chr11	6216403	6216426	Satt509_R	Chr11	6216583	6216563	CTACCGTGTGGTGGTGTGCTACCT	CAAGTGGCCAGCTCATCTATT
Chr11	47.5	GMES0959	GMES0959_F				GMES0959_R	Chr11	7264352	7264371	TTCATTCACCAACACAACCC	GGCAGCCATATTGTGAGGAT
Chr11	49.8	GMES5234	GMES5234_F	Chr11	7527933	7527952	GMES5234_R	Chr11	7528217	7528198	TGGTTTCCGTCCCTTACTTG	GGTAAGTCCTTGGAGGAGGG
Chr11	52.1	GMES1708	GMES1708_F	Chr11	8171848	8171829	GMES1708_R				GTTTCGTTTGCAGTTTGGGT	TTTTCATGCCCAAGAAATCA
Chr11	54.5	s024800057-2	s024800057-2_F	Chr11	8651822	8651844	s024800057-2_R	Chr11	8652188	8652164	CAGGTGATCAAGATGACGAATAA	TCATATTATGTACTTCAGGATCAAG
Chr11	56.7	Satt197	Satt197_F	Chr11	8898592	8898573	Satt197_R	Chr11	8898420	8898444	CACTGCTTTTTCCCCTCTCT	AAGATACCCCCAACATTATTTGTAA
Chr11	57	s013700007-2	s013700007-2_F	Chr11	9106372	9106390	s013700007-2_R	Chr11	9106481	9106464	GTGTGCAGTGTGCTGTGAT	TCGCTGAAACTTCCTACG
Chr11	58.6	T001109308s	T001109308s_F	Chr11	9335167	9335189	T001109308s_R	Chr11	9335362	9335341	TCCAAATTGAGACTTGGAATCAT	CTCGCCTGCATACTGGTTTAAT
Chr11	61.1	T001109543l	T001109543l_F	Chr11	9571180	9571202	T001109543l_R	Chr11	9571487	9571465	TGACAAACGAACAAGCACTTAAC	TATTATTTGCGCGGTTTACAAGT
Chr11	62.1	T001109656s	T001109656s_F	Chr11	9683464	9683486	T001109656s_R	Chr11	9683650	9683628	TGCACTTTCATCATGGTTATGTC	TCAAGTCTTATGCATGTTGTTCC
Chr11	65.1	Sat_128	Sat_128_F	Chr11	10010722	10010698	Sat_128_R	Chr11	10010508	10010532	GGGGTTTTGTTAATCATTGTCCTTAGAT	GGGAGAAAATTTTTAATGCCAGTAGTTA
Chr11	65.7	GMES2543	GMES2543_F	Chr11	10159757	10159774	GMES2543_R	Chr11	10160069	10160050	ACCAGCTCCAGCGCAACT	GCAGAGGGAAAATGTACGGA
Chr11	65.7	C11-BARC-042767-08401	C11-BARC-042767-08401_F				C11-BARC-042767-08401_R	Chr11	10211921	10211902	AAACTGAGAGACGCTAGGAC	TTGGTGTGCAGACTAGCTAC
Chr11	69.4	GMES0766	GMES0766_F	Chr11	10593097	10593116	GMES0766_R	Chr11	10593262	10593240	GGGGTGCGTGAAGTTGTAGT	GTTAAATTCATGGAGCAAATTGT
Chr11	71.7	s013701958-2	s013701958-2_F	Chr11	11055924	11055946	s013701958-2_R	Chr11	11056099	11056077	TCCTTAACGAATTAGGTTGCACT	TCTCTATCAAAGCGCACAATATC
Chr11	71.9	s008000014-2	s008000014-2_F	scaffold_32	12933	12955	s008000014-2_R	scaffold_32	13286	13264	TACAACTTTGATGTTCCCATCTT	AAGCTCCTTCCTCTCAAGTTGTT
Chr11	74.9	T001111280m	T001111280m_F	scaffold_32	244735	244757	T001111280m_R	scaffold_32	244945	244923	GGTGCTCTTCCTCACATTAGAGA	TAGGTTGCAAGTATAGCGTGTTT
Chr11	77.4	GMES0027	GMES0027_F	scaffold_21	3388310	3388292	GMES0027_R	scaffold_21	3388081	3388100	GCAGATGCGGTTACGAATTT	AAACCGTCAACCTGGTCAAG
Chr11	79.6	s008000965-2	s008000965-2_F	scaffold_21	2877576	2877554	s008000965-2_R	scaffold_21	2877395	2877417	TGGGCTAAACCCACTATAATTCA	AAGCCCTCTATATTTCTTGACGC
Chr11	79.6	s008002161-2	s008002161-2_F	scaffold_21	1675562	1675544	s008002161-2_R	scaffold_21	1546311	1546332	CGTCGCCCTAGAAATTTGA	CATGGTCAAGGTAGTTAACATT
Chr11	79.6	Satt519	Satt519_F	scaffold_21	886743	886721	Satt519_R	scaffold_21	886506	886529	GGATTTCAAAGAATGAACACAGA	CCGCAAGGTTACGAACTGCTCGAA
Chr11	79.6	s008003458-2	s008003458-2_F	scaffold_21	407129	407110	s008003458-2_R	scaffold_21	406930	406949	AATGGGAATTTAGCTGGTAT	CATCATTCACAGAATGCAAA
Chr11	80.1	s008003841-2	s008003841-2_F				s008003841-2_R	scaffold_21	14824	14846	AAATAGGTTGTCAAGACCTCTGAA	GCCGAATCACCTCTAATTAAATC
Chr11	81.8	T001115342m	T001115342m_F	Chr11	13354878	13354900	T001115342m_R	Chr11	13355175	13355153	AAATTTAATTCAAACGTCCCGAG	TTGGTGATCTTTATGTTTCGAGG
Chr11	85	T001115835m	T001115835m_F	Chr11	13853711	13853733	T001115835m_R	Chr11	13853970	13853948	GGCATCAATGGCTGAAGATATAA	ACTAACATAAAGGCAAATGCCAC
Chr11	88.6	GMES0675	GMES0675_F	Chr11	14367562	14367540	GMES0675_R	Chr11	14367447	14367466	GCACCAATTCATTCTCATACATTC	TGCAGATCGTAAGTGGCTTG
Chr11	90.8	T001116639s	T001116639s_F	Chr11	14697985	14698005	T001116639s_R	Chr11	14698194	14698172	TTTGGATGTTCCCAACTGAAG	CTAAGACATGCATCATAAATGGG
Chr11	93.8	Sat_348	Sat_348_F	Chr11	14953240	14953218	Sat_348_R	Chr11	14952996	14953014	AAGCCGCACACTAAGATGAAGAT	TGAATAACCAAATGGAAAGAGATT
Chr11	94	Satt597	Satt597_F	Chr11	15124629	15124649	Satt597_R	Chr11	15124784	15124765	GCTGCAGCGTGTCTGTAGTAT	CGAGGCACAACCATCACCAC
Chr11	97.9	GMES2944	GMES2944_F	Chr11	16086354	16086335	GMES2944_R	Chr11	16086256	16086275	ATTCCAAACCCCTCTTTGCT	TGGTTGTGGTTTTGGTGAGA
Chr11	98.4	s019400004	s019400004_F	Chr11	18158793	18158771	s019400004_R	Chr11	18158431	18158453	GCGGAAGAAGAAAGTTTAACTCA	ACCCATGCACGTATAACAAAGAG
Chr11	98.4	s010300014	s010300014_F	Chr11	18180529	18180554	s010300014_R	Chr11	18180887	18180865	CCATAATCATAATAACAACAAACACA	GAAGCCAAGCCATGAGTAATACA
Chr11	98.7	s011500007	s011500007_F	Chr11	20949637	20949652	s011500007_R				ACCAGACGATTCATTCTTTGATG	CTTGGTATGAGGAGGTGAACTTG
Chr11	99.2	Satt332	Satt332_F	Chr11	24261882	24261862	Satt332_R	Chr11	24261641	24261661	CATCCAGGGCTTGCAACAAAG	GTCCTTATATATGGAAGATCA
Chr11	99.5	s004503530-2	s004503530-2_F	Chr11	25683170	25683193	s004503530-2_R	Chr11	25683310	25683288	TTGAGAAACAAAGAAATGGAGAAA	TCACAACAGAGACTCAACCTCAA
Chr11	99.5	s004504766-2	s004504766-2_F	Chr11	26916890	26916912	s004504766-2_R	Chr11	26916997	26916975	ATTGCTTCCATAAACACTTTCCT	TTTGGCGCTATTAATATGGAAGA
Chr11	99.5	s004505064-2	s004505064-2_F	Chr11	27216590	27216612	s004505064-2_R	Chr11	27216956	27216934	AAATGTTCAGTTCAAACTTTATG	ATATGTTGAGTTGTCCATCCCAT
Chr11	99.5	s004506014-2	s004506014-2_F	Chr11	28146514	28146536	s004506014-2_R	Chr11	28146926	28146904	AAGTGGGTGGGTTTGACTTATCT	CGAAATTCAAATGAACACTCACA
Chr11	100	s004507090-2	s004507090-2_F	Chr11	29249850	29249872	s004507090-2_R	Chr11	29250239	29250217	GAAACATATTTGGGCACGTTTAG	ACAGTTGCAATGACCAGCTATTT
Chr11	101.1	s008100306-2	s008100306-2_F	Chr11	29584107	29584128	s008100306-2_R	Chr11	29584256	29584234	CGCAGTTGACTGGTTGGTAGAT	AAATCCTAGTTAGCAAGACCCTG
Chr11	101.9	s008101679-2	s008101679-2_F	Chr11	30907002	30907024	s008101679-2_R	Chr11	30907192	30907168	CATATCCTAGTGATCTCCTTCCC	TGAGAGATGATTTGTTTCTTATACA
Chr11	102	s008102061-2	s008102061-2_F				s008102061-2_R				CATACTTGTCAGCCCGAGTATGT	GAGTTGGAGTTGCGATGAATAAC
Chr11	106.1	T001135274s	T001135274s_F	Chr11	32036419	32036441	T001135274s_R	Chr11	32036613	32036591	AGAATCAATTCCTCAGTGTCCAG	GATCAAGTTCAGGTACTTGTGGG
Chr11	109.4	s008102683-2	s008102683-2_F	Chr11	32312171	32312193	s008102683-2_R	Chr11	32312370	32312348	TTTGAAATAATAACATATGGGTG	TGGTCGTCTATCTCTTTATCTTT
Chr11	110.5	s008102932-2	s008102932-2_F	Chr11	32559252	32559274	s008102932-2_R	Chr11	32559436	32559414	TATTTATAATCAACGCCTGCTGC	ACGACCCAATTAGGACAAACTAA
Chr11	115.3	GMES1633	GMES1633_F	Chr11	32882552	32882533	GMES1633_R	Chr11	32882393	32882412	ATGAGAGGTTGCCACTGGAG	GGCATGTTCTGACCATTGTG
Chr11	118.4	Satt665	Satt665_F	Chr11	32993502	32993480	Satt665_R	Chr11	32993250	32993276	TTGAATTCGCTGGTTTAATCCTA	CATGACTTAATTTTACACCCTTTATTT
Chr11	122	s029700038	s029700038_F	Chr11	33330955	33330977	s029700038_R	Chr11	33331260	33331237	GCTTTGTCGTTCCTTTGTATGTT	GGATATATTCCTTTCATCCATCTG
Chr11	125.4	Satt359	Satt359_F	Chr11	33650518	33650499	Satt359_R	Chr11	33650345	33650368	AGAAAATAATCCTGCTCAAG	TTTAAGTCCAATAACAAAGATAAC
Chr11	129.6	s024000510	s024000510_F	Chr11	34007712	34007732	s024000510_R	Chr11	34008049	34008027	ATGCTTGAGGAGTGGATCCTT	GGCCATAAGTCTATGCCTTCTTT
Chr11	130.7	GMES4299	GMES4299_F	Chr11	34195668	34195694	GMES4299_R	Chr11	34195843	34195824	ACCATAATCCATAGATATTCTTATTGC	CCCTATTGGTGGGGTTTCTT
Chr11	133.8	GMES1793	GMES1793_F	Chr11	34549704	34549723	GMES1793_R	Chr11	34549975	34549956	GGAGGAAGAAGGGGAACAAG	ATATGAACCGTTGGCCTGAG
Chr11	136.4	GMES1076	GMES1076_F	Chr11	34731435	34731454	GMES1076_R	Chr11	34731639	34731620	ATCCACCGTTGTATCCGAAG	GCGCAGATCTCACAGAAGTG
Chr11	137.8	T001138898m	T001138898m_F	Chr11	34874929	34874907	T001138898m_R	Chr11	34874662	34874689	AACTAGCCAAGTCCTATCCAACC	TTGAAATTGAGAAAGTATTAACTTCACT
Chr11	141.1	GMES2517	GMES2517_F	Chr11	35220623	35220604	GMES2517_R	Chr11	35220494	35220513	TCCTCTCTCGAATTCACGCT	CACGAACACTTGATGACGCT
Chr11	143	Satt453	Satt453_F	Chr11	35412705	35412685	Satt453_R	Chr11	35412463	35412483	GAAAAAAAACAATAAACAACA	TAGTGGGGAAGGGAAGTTACC
Chr11	143.6	BE801538	BE801538_F	Chr11	35567221	35567239	BE801538_R	Chr11	35567422	35567408	TAGCTTTCTATTGTCTAAT	AACTCCACCACTCTG
Chr11	143.6	GMES0591	GMES0591_F	Chr11	35567269	35567290	GMES0591_R	Chr11	35567406	35567387	GCAAGAAGCAAGTAATCCCTCA	TCTTCCCTGGCAATTGAAAC
Chr11	143.6	GMES1589	GMES1589_F	Chr11	35567268	35567288	GMES1589_R	Chr11	35567420	35567401	TGCAAGAAGCAAGTAATCCCT	CTCCACCACTCTGCTCTTCC
Chr11	144.2	GMES2797	GMES2797_F	Chr11	35602613	35602632	GMES2797_R	Chr11	35602863	35602844	GGTTCTGATTCCGAGGTTGA	CTCAAGCTGTTCCTTGAGGG
Chr11	144.9	GMES1132	GMES1132_F	Chr11	35759045	35759064	GMES1132_R	Chr11	35759296	35759277	ACTCCCACTCCCACTTCCTC	CCTGGTGTTTCCAGAGCATT
Chr11	144.9	GMES6369	GMES6369_F	Chr11	35769687	35769706	GMES6369_R	Chr11	35769806	35769787	GCGTAGCACAGAGACACAGC	TGAAGGCGAAAGAATGGAGT
Chr12	0	T001200015l	T001200015l_F	Chr12	18323	18341	T001200015l_R	Chr12	18688	18670	GATGTGGTCACTCAGTTGGATTT	GTTCTGAGAGAGAGAATGACGGA
Chr12	0.8	Satt666	Satt666_F	Chr12	311932	311957	Satt666_R	Chr12	312165	312138	TGGCTTGTCATCTCTACTTTTATTAG	TCATGCATCTAATTTGTTTTATCTATCA
Chr12	6.1	T001200938m	T001200938m_F	Chr12	942400	942422	T001200938m_R	Chr12	942631	942609	GCAACTCAGCATTAGGTCCTTTA	GTTTATGTAACGATCGAGTTCGG
Chr12	6.4	C12-BARC-026101-05260	C12-BARC-026101-05260_F	Chr12	1078483	1078502	C12-BARC-026101-05260_R	Chr12	1078552	1078533	AGAACAGGAAACATACTCCG	CTGGCCTGATATCAAACCTC
Chr12	9.4	Satt353	Satt353_F	Chr12	1687063	1687086	Satt353_R	Chr12	1687229	1687207	CATACACGCATTGCCTTTCCTGAA	AATGGGAATGCCTTCTTATTCTA
Chr12	10.4	C12-BARC-016413-02582	C12-BARC-016413-02582_F	Chr12	2101055	2101074	C12-BARC-016413-02582_R	Chr12	2101138	2101120	ACCATCTACAATACTACCCC	GCTGTAAAAAGCTTGTACT
Chr12	13.2	C12-BARC-021905-04235	C12-BARC-021905-04235_F	Chr12	2776242	2776261	C12-BARC-021905-04235_R	Chr12	2776322	2776303	CTCTTCAAACGCACCATGAT	GGCAATAAAGGGTGATCAAC
Chr12	13.7	GMES4242	GMES4242_F	Chr12	2969338	2969358	GMES4242_R	Chr12	2969600	2969581	CACGCGCTCGTTTCTATATTC	ATCACTCCCGGAGAAACCTT
Chr12	13.7	C12-BARC-040509-07765	C12-BARC-040509-07765_F	Chr12	3007125	3007144	C12-BARC-040509-07765_R	Chr12	3007192	3007173	TGTTGTTGCTTTGACGCGTG	TCAAATAATGCGGTAGCCAG
Chr12	13.7	GMES0816	GMES0816_F	Chr12	3122039	3122058	GMES0816_R	Chr12	3122300	3122281	AGTTTCTCCAGCCTCCATCA	AATGGACAGAACTTGGACGG
Chr12	14	GMES1494	GMES1494_F	Chr12	3122368	3122349	GMES1494_R	Chr12	3122139	3122158	GATCCAGGGGTTTTGGATTT	ATAACCACCGTCACGGCTAC
Chr12	17.2	GMES3950	GMES3950_F	Chr12	3463289	3463308	GMES3950_R	Chr12	3463518	3463499	ATCTCCGTGGCTATTGCCTT	CTGCTTGATTTGAATCCCGT
Chr12	18.6	GMES0837	GMES0837_F	Chr12	3704626	3704645	GMES0837_R	Chr12	3704740	3704721	TCTCTGAACCCCATTTTTGC	TCTCACACACATCGCACTGA
Chr12	18.6	C12-BARC-014337-01324	C12-BARC-014337-01324_F	Chr12	3709922	3709941	C12-BARC-014337-01324_R	Chr12	3710003	3709984	CCCTTAACCTTGCTTCATCC	GTAAAGCCTTTTTCTAATCG
Chr12	21.2	T001203975l	T001203975l_F	Chr12	3979102	3979124	T001203975l_R	Chr12	3979465	3979443	TGGTGTTGATTTACCCACTTACA	AAACAAATATACCGATCCCAGGT
Chr12	25	Satt568	Satt568_F	Chr12	4519715	4519696	Satt568_R	Chr12	4519483	4519508	GAATAATCCAATTCAATTTA	CGGACACCGGTCTACTAGGAAAGTAA
Chr12	27.8	T001204926m	T001204926m_F	Chr12	4926915	4926937	T001204926m_R	Chr12	4927225	4927203	ACCTCACGAGCTAAGTACGTGTC	AGAGTGAATCAGCGCTACCTAAA
Chr12	30.3	s011202278	s011202278_F	Chr12	5224080	5224102	s011202278_R	Chr12	5224379	5224354	TGGAACTAGGAATTTCAAAGCAA	GGAGGTGTAAATCAAATGATAGATGA
Chr12	33.9	s024200450	s024200450_F	Chr12	5542211	5542187	s024200450_R	Chr12	5542028	5542048	TGCTAACAATATTCTCGTCAAAGAA	TTATCCAACATCCCAAATCCC
Chr12	36.1	s024200389	s024200389_F	Chr12	5603742	5603720	s024200389_R	Chr12	5603584	5603606	TGGTCACATCCATGATTCAAATA	CGTAAATCAGCATGGCTAGATAA
Chr12	40.3	s024200027	s024200027_F	Chr12	5964305	5964283	s024200027_R	Chr12	5964084	5964106	CAGAGTCACCGCTGATTAAGATT	ACTGACATGTTGCTTTGTCGTGT
Chr12	41.1	s023500372	s023500372_F	Chr12	6207815	6207793	s023500372_R	Chr12	6207471	6207493	TCAAATATAATGGGACGAAAGGA	TATCTGTAAGAGTGATCTGGCGG
Chr12	42.8	Satt442	Satt442_F	Chr12	6390238	6390259	Satt442_R	Chr12	6390494	6390473	CCTGGACTTGTTTGCTCATCAA	GTTCAAGGCTTCAAGTAGTCAC
Chr12	42.8	C12-BARC-041917-08135	C12-BARC-041917-08135_F	Chr12	6399270	6399289	C12-BARC-041917-08135_R	Chr12	6399345	6399325	CTCATTTAAAGAAGAGGAGG	GAGCCTTAAGAAACAAGTTAG
Chr12	43.3	s023500058	s023500058_F	Chr12	6521863	6521841	s023500058_R	Chr12	6521515	6521537	TAAATTGTGGCATCAGGTCTAGC	ACTGGAAATGTTCCCATTAGTCA
Chr12	44.1	s022000092-2	s022000092-2_F				s022000092-2_R	Chr12	6671044	6671022	CCCACTAAACCTTGTGTACCTATTT	CCTTATGCATAGGTTGAATTTGC
Chr12	45.8	C12-BARC-044091-08613	C12-BARC-044091-08613_F	Chr12	6884392	6884411	C12-BARC-044091-08613_R	Chr12	6884459	6884441	TGGGAGACCAAACAGCAAAC	CAGTAGGTTTCTAGCTTTG
Chr12	46.6	GMES0947	GMES0947_F	Chr12	7168302	7168283	GMES0947_R	Chr12	7168001	7168020	CCAAACCAAACGCTTTTCTC	TTCTGAGTGATGGCCTCCTT
Chr12	47.4	GMES1103	GMES1103_F	Chr12	7175878	7175895	GMES1103_R	Chr12	7176321	7176302	CACTCCAAGACCCTCACCAT	TCCACCCACGTACATGAGAA
Chr12	48.2	s011002118-2	s011002118-2_F	Chr12	7755322	7755304	s011002118-2_R	Chr12	7755129	7755151	AGTTGGCCAAATCGACCTT	TACCAAAGGCTATTAAACTTCCT
Chr12	52.1	C12-BARC-015305-02270	C12-BARC-015305-02270_F	Chr12	8035009	8035028	C12-BARC-015305-02270_R	Chr12	8035082	8035063	TGTGTGGAAGCTAGATTCAG	GCCACACACTACAGTTATGG
Chr12	53.8	T001208472m	T001208472m_F	Chr12	8506006	8506024	T001208472m_R	Chr12	8506333	8506311	CCCTTCGTGATGAATCTTT	TTTGTATGCAAATATGTAGGAAT
Chr12	55.7	C06-BARC-030173-06820	C06-BARC-030173-06820_F	Chr12	9127485	9127466	C06-BARC-030173-06820_R	Chr12	9127426	9127445	TTTTTACATTACAAGAACTC	ATAGACCCTATGTTTCTGTG
Chr12	55.7	Sat_334	Sat_334_F	Chr12	9131072	9131049	Sat_334_R	Chr12	9130854	9130875	TAACGTAGCAAATTGACTATAAGA	TGTGCAAAGACAATTTCAATGA
Chr12	56.8	s032700039-2	s032700039-2_F	Chr12	9914400	9914421	s032700039-2_R	Chr12	9914500	9914478	AATGTCCACCGTTCACAAATCT	TATATGACTCGGCATTTCCTGTT
Chr12	57.3	s032700098-2	s032700098-2_F	Chr12	9973491	9973513	s032700098-2_R	Chr12	9973625	9973603	GTCCCGTGGGTTAGAAATTAGAA	GCTGATATCTCCTTGTGCAGAGT
Chr12	57.3	s032700102-2	s032700102-2_F	Chr12	9976988	9977008	s032700102-2_R	Chr12	9977347	9977325	CCAAACCCGAATTCACACTTT	TTCAGACATCGTTTCCAAATCTT
Chr12	57.3	C15-BARC-018577-02980	C15-BARC-018577-02980_F	Chr12	10406910	10406929	C15-BARC-018577-02980_R	Chr12	10406989	10406970	TCCTTATGTGTGTACTTGTG	CCTTCCTTTCTCTTCTCGTG
Chr12	60.4	Satt541	Satt541_F	Chr12	12319253	12319237	Satt541_R	Chr12	12319087	12319108	AATCCATCACACATAAA	GTACTCCCTCCAGAAAATAACC
Chr12	62.2	C12-BARC-039961-07622	C12-BARC-039961-07622_F	Chr12	15679096	15679116	C12-BARC-039961-07622_R	Chr12	15679178	15679160	CTGTTCAAATACTGGACAGAC	TGTTGTACATTCAAAAGCG
Chr12	62.5	GMES1506	GMES1506_F	Chr12	17231914	17231895	GMES1506_R	Chr12	17231804	17231823	CAGCAAGAGCAACAGCAATC	GAGAGGGGGAGGAGAGAGAA
Chr12	63.3	T001222767s	T001222767s_F	Chr12	18964230	18964251	T001222767s_R	Chr12	18964427	18964405	TTCGTATACGCATGGCTTCTTT	ATCCAAATATTGGCCTTCTGTTT
Chr12	63.8	T001223395s	T001223395s_F	Chr12	19594528	19594550	T001223395s_R	Chr12	19594691	19594669	GGCACAAACGTATTCTATTCTCG	TGCAATAGTCAGAAACTGAACCA
Chr12	65.2	T001225156s	T001225156s_F	Chr12	21353602	21353624	T001225156s_R	Chr12	21353797	21353773	ATCTTACCTAGGTGCACACACAA	CCTCATATGTAGCCATGTTTATTGA
Chr12	66.5	Satt222	Satt222_F	Chr12	28162318	28162345	Satt222_R	Chr12	28162552	28162530	TGTTTTGTGAAAATAATAATTAAAGATG	CCACAAGTAACTAATGTAATAGGTGTT
Chr12	66.5	T001228018s	T001228018s_F	Chr12	24394664	24394686	T001228018s_R	Chr12	24394868	24394846	ACGAGGCTCTAATACCATTCGAT	ATTAAATTTGTATCCTCCTCAAA
Chr12	66.8	T001229478m	T001229478m_F	Chr12	30270362	30270384	T001229478m_R	Chr12	30270606	30270582	AGTTTCTAACTATCAGCGGAGGG	TTTAACTTAACAATGGTCATCCAAA
Chr12	67.1	T001231438s	T001231438s_F	Chr12	31393498	31393520	T001231438s_R	Chr12	31393643	31393621	AAGATGAGGAGTAACTTGGTCCC	TCTTCATGATGTTGATCGATTTG
Chr12	70.1	T001232591l	T001232591l_F	Chr12	32547942	32547964	T001232591l_R	Chr12	32548304	32548282	CATCTTCCAATTAGAAATCCGTG	TTATTTGACTCGAGAACAAGCGT
Chr12	74.2	GMES6353	GMES6353_F	Chr12	33409423	33409442	GMES6353_R	Chr12	33409661	33409642	ACTTGTTATGGCCAACCTGG	GCATCCTTGGAAGGAACACA
Chr12	77.8	T001234032l	T001234032l_F	Chr12	33992177	33992199	T001234032l_R	Chr12	33992525	33992502	ATGTCATAGCATTTGTGGGCTAT	AAAGAACTATGCTCTGTGCGTAAA
Chr12	80.5	GMES4202	GMES4202_F	Chr12	34399045	34399022	GMES4202_R	Chr12	34398954	34398973	CTTCTTTATCCTCTTCCTCTTCCT	GCTGCCATTTCTGTTGGATT
Chr12	80.8	LFsoy8	LFsoy8_F	Chr12	34539900	34539881	LFsoy8_R	Chr12	34539515	34539533	TGAGGGAACACTTACACTGG	CTTTCATTCAGGCTCAGACC
Chr12	83.4	Satt302	Satt302_F	Chr12	35083082	35083058	Satt302_R	Chr12	35082880	35082905	AACTGTAGTTTACTAAAAATAAGTG	GACTGAATTAATATTGGTGTTGAATT
Chr12	85.5	T001235266m	T001235266m_F	Chr12	35240248	35240270	T001235266m_R	Chr12	35240562	35240540	ATTAATGATAGCCGGTGTGCTAA	GTGGAAGCAAGAGTGACGTATTT
Chr12	88.7	Satt637	Satt637_F	Chr12	35538950	35538970	Satt637_R	Chr12	35539142	35539120	CCATAAGCGAAAGCGATGAAT	GAGAAAAATAAGAACATCACCCA
Chr12	91.2	T001235782s	T001235782s_F	Chr12	35755690	35755714	T001235782s_R	Chr12	35755848	35755824	TTTAGGGTTATAGTAGATTTGGAGA	GAATCAAGTAATGACTTCTGTCTCA
Chr12	92.8	Sat_216	Sat_216_F				Sat_216_R	Chr12	35871951	35871975	ACAAGATATTTGAATGTAGATGAGAC	CCGATCCTCTCGTAAATATAAGGAA
Chr12	93.3	Satt142	Satt142_F	Chr12	36033821	36033801	Satt142_R	Chr12	36033671	36033694	GGACAACAACAGCGTTTTTAC	TTTGCCACAAAGTTAATTAATGTC
Chr12	93.3	Satt293	Satt293_F	Chr12	36036612	36036590	Satt293_R	Chr12	36036414	36036436	CAGAAGGTTTGCATAAAAAGAAT	GGCTAAAAAGTTGATGTAATGTG
Chr12	98.6	T001236301l	T001236301l_F				T001236301l_R				CAAAGGTTACATATAGTCCATATTGTCG	AAAGGAAATTGAACCTCATGTTT
Chr12	98.6	Satt181	Satt181_F	Chr12	36365746	36365730	Satt181_R	Chr12	36365532	36365549	TGGCTAGCAGATTGACA	GGAGCATAGCTGTTAGGA
Chr12	99.7	GMES0183	GMES0183_F	Chr12	36553442	36553461	GMES0183_R	Chr12	36553647	36553628	AGTGATGTGGAAATGGAGCC	GAGCCTGAAATCGCCAAATA
Chr12	99.7	Sat_175	Sat_175_F	Chr12	36556063	36556090	Sat_175_R	Chr12	36556343	36556320	TCATTGTTAAAACTTAGTGTCTAATAAA	GTCAAAGTCAGTTAGTGAAAGAGA
Chr12	103.8	s015200524	s015200524_F	Chr12	36951018	36950997	s015200524_R	Chr12	36950772	36950795	TTAGATGAGGCACCATGTCATC	GTGATATTGCTTACCGTCATGTTG
Chr12	104.3	s015200498	s015200498_F	Chr12	36977012	36976989	s015200498_R	Chr12	36976707	36976730	ATTATACGGAGTTCCTTCACCAAC	TTAATATATGATGCAGCCATGTCG
Chr12	106.2	s015200299	s015200299_F	Chr12	37175119	37175095	s015200299_R	Chr12	37174821	37174842	TTGCTTGAATATATAGCAACTCTTG	TTGATCATTCTATCCGCCAGTT
Chr12	106.5	s015200130	s015200130_F	Chr12	37344419	37344397	s015200130_R	Chr12	37343998	37344021	TTATTCAATTTCGATGGAGCAAA	AAATAGAAGCAAAGAAATGGAAAC
Chr12	106.8	s015200071	s015200071_F	Chr12	37403272	37403249	s015200071_R	Chr12	37402905	37402929	TTCTATGTGACAATGGGTGATTAAA	AAGCCAAAGATAATTGCTAAATAAA
Chr12	107	GMES2597	GMES2597_F	Chr12	37428239	37428220	GMES2597_R	Chr12	37427998	37428017	TTGTGGTCACATCCGACACT	ATCAGCGGGTAATCGAACAG
Chr12	107	s015200037	s015200037_F	Chr12	37436907	37436885	s015200037_R	Chr12	37436550	37436572	CGTGTTCTACCGTTGAGATAACC	CTAAGCCAAATGGCCAAGTCTAT
Chr12	107.3	Sat_218	Sat_218_F	Chr12	37557103	37557080	Sat_218_R	Chr12	37556823	37556844	CACGTTAAATGAACTGGTATGATA	GGCCAAAGAGGAAGATTGTAAT
Chr12	107.6	C12-BARC-042997-08496	C12-BARC-042997-08496_F	Chr12	37731996	37732015	C12-BARC-042997-08496_R	Chr12	37732078	37732059	TCTAACAACCACCACCTCTC	GGAGTTAGGGCAGTTGAATT
Chr12	108.7	s025000125	s025000125_F	Chr12	37843061	37843039	s025000125_R	Chr12	37842620	37842642	TCTTAAGGGTATTGTTTGGCTGA	AATTGAAGGAACATTCCATTGTG
Chr12	112.6	GMES0893	GMES0893_F	Chr12	38085900	38085879	GMES0893_R	Chr12	38085743	38085762	AAAACATTTCCCTGCTACTTCA	GAGGCAAACTCAATTGGGAA
Chr12	113.7	C12-BARC-039237-07479	C12-BARC-039237-07479_F	Chr12	38180672	38180691	C12-BARC-039237-07479_R	Chr12	38180748	38180729	CCCATGTTGTTCTAGAGACC	AGGATGTTATCTATCCACTC
Chr12	114.7	Satt434	Satt434_F	Chr12	38429066	38429042	Satt434_R	Chr12	38428727	38428751	TTCCGATATACTATATAATCCTAAT	GGGTTAGTCTTTTTATTTAACTTAA
Chr12	115	GMES3677	GMES3677_F	Chr12	38522868	38522887	GMES3677_R	Chr12	38523043	38523024	GGAAGGCATCATAGCAGTGG	GTCAAAGAAACCAGGGTGGA
Chr12	119	T001239064s	T001239064s_F	Chr12	39038954	39038976	T001239064s_R	Chr12	39039118	39039095	TGCTAAATGTTACCTCGGTTTGT	CCTGAGAATACATAGAAGCAAACG
Chr12	122	GMES0862	GMES0862_F	Chr12	39617801	39617820	GMES0862_R	Chr12	39618070	39618051	TTTTCCCCTACGCACAAATC	ACCGAGGTCTCTCGAACTGA
Chr12	122	GMES4755	GMES4755_F	Chr12	39662710	39662691	GMES4755_R	Chr12	39662499	39662519	AGCATCAAGATGGCAAAAGG	TGCGACTCCATTAGGTTGTTT
Chr12	123.1	T001239885l	T001239885l_F	Chr12	39862981	39863003	T001239885l_R	Chr12	39863323	39863301	AATGAATTTGAATCACTCCCAGA	ACCTTAAACCTGGGTTGTTTGAT
Chr12	123.1	C12-BARC-025709-05012	C12-BARC-025709-05012_F				C12-BARC-025709-05012_R	Chr12	39868377	39868396	TGTTTTATTCAGGGTCACCG	GGGAGCATCTGTCTTTTGTT
Chr13	0	T001320046m	T001320046m_F	Chr13	215642	215620	T001320046m_R	Chr13	215323	215345	TTGAAGTGTAAACATGCTGATGG	TTTCATTGATCCCATGCTTTAAT
Chr13	0	T001319486m	T001319486m_F	Chr13	766596	766574	T001319486m_R	Chr13	766283	766304	CAATAATGACCCTCCCACACTTA	CCCATGCATTCATTATCAAATCT
Chr13	0	T001319133l	T001319133l_F	Chr13	1121553	1121531	T001319133l_R	Chr13	1121195	1121217	TTCAGAACTATTTCCGGTGAAGA	ACCATTGTTCATTGAGAGACGAC
Chr13	0.3	T001318664l	T001318664l_F	Chr13	1473860	1473836	T001318664l_R				TGTAGTAGTGATTCCAAATCAATGG	GGGAGCACTATAGCTTGCTTAAC
Chr13	0.5	T001317338m	T001317338m_F	Chr13	2717319	2717297	T001317338m_R	Chr13	2717003	2717025	CTGTTCATGTCAAGGATTAGGCT	GAGTGAGAGGAATAGAAGCCCAT
Chr13	0.5	T001316370s	T001316370s_F	Chr13	3690956	3690934	T001316370s_R	Chr13	3690835	3690857	AATTGAACTTGCTACGTCATGGT	GCACATCTCTAACACACATTGGT
Chr13	0.5	T001314272m	T001314272m_F	Chr13	6025753	6025731	T001314272m_R	Chr13	6025466	6025488	CTATGAGGCCCAAAGTCATCTAC	GGGTAACCCTTATGTATCATGTG
Chr13	0.5	T001314138m	T001314138m_F	Chr13	6159331	6159311	T001314138m_R	Chr13	6159084	6159106	TAGTTTCCTCGGTCACCATCTAA	TGTTCGTCAACTTTCCTGAGAAT
Chr13	0.5	T001313681l	T001313681l_F	Chr13	6606406	6606384	T001313681l_R	Chr13	6606028	6606052	CTCCCACATGAAGATATACCGAA	TGACATAGCATTGCATAAGGATAAA
Chr13	0.5	Satt325	Satt325_F	Chr13	6720127	6720107	Satt325_R	Chr13	6719884	6719904	GGGTATTAAGGGAAAACAAAA	TAAACGAACAATCACTTCATA
Chr13	0.5	T001313439l	T001313439l_F	Chr13	6928360	6928342	T001313439l_R	Chr13	6927938	6927960	CCTCCTCCCTTGGCAATTT	TTGTAACTGTTTGAATGCCTGAA
Chr13	0.5	Satt146	Satt146_F	Chr13	7288065	7288045	Satt146_R	Chr13	7287779	7287803	AAGGGATCCCTCAACTGACTG	GTGGTGGTGGTGAAAACTATTAGAA
Chr13	0.8	GMES1672	GMES1672_F	Chr13	7757434	7757415	GMES1672_R	Chr13	7757176	7757195	CACCAACACCACTTCCTCCT	GTTGTCCCCATGCTTCTTGT
Chr13	1.6	Satt343	Satt343_F	Chr13	10392211	10392229	Satt343_R	Chr13	10392340	10392323	CATGGCGGAAAGCGAAACA	TCCCAATTCACCTCTTCA
Chr13	2.3	GMES0321	GMES0321_F	Chr13	10466274	10466255	GMES0321_R	Chr13	10466046	10466065	TAAGCAAGCCTGGTTTCGAG	ATCCTCCTTGGTTGATGCTG
Chr13	2.9	Satt193	Satt193_F	Chr13	11847351	11847329	Satt193_R	Chr13	11847117	11847136	TTTCGATAAAAATGTTACACCTC	TGTTCGCATTATTGATCAAAAAT
Chr13	2.9	s000703340-2	s000703340-2_F	Chr13	12944643	12944621	s000703340-2_R	Chr13	12944425	12944447	CCGTGCAGTCCGTCAGCTGAATACACGAATGCTAAATTGC	TTAGTTAGCCCTAGGACAAGTGG
Chr13	3.2	s000702833-2	s000702833-2_F	Chr13	13446571	13446549	s000702833-2_R	Chr13	13446422	13446445	TCACAATCTCGCAAGATCAAATA	AATTGCACCGAGTGTAAACTATAA
Chr13	6.2	s000702358-2	s000702358-2_F	Chr13	13923316	13923294	s000702358-2_R	Chr13	13922927	13922949	CTAGTGTAATACCTCGTGCCTGC	TAGTATAGTGCGGGTAACAAGCG
Chr13	7.1	s000701869-2	s000701869-2_F	Chr13	14411868	14411846	s000701869-2_R	Chr13	14411673	14411694	CAATTAGGCCAACTTTGAATGAG	CCTTGAACGAGAGATGCTTTGT
Chr13	8.7	s000701362-2	s000701362-2_F	Chr13	14921630	14921607	s000701362-2_R	Chr13	14921276	14921298	TGCAATTCACGTATGTTGAAATCT	CACTCATCTTTGTTTGACATTGC
Chr13	13.6	s000700355-2	s000700355-2_F	Chr13	15914965	15914943	s000700355-2_R	Chr13	15914708	15914730	CCACCGACGTGTCGCACTGCAAATATGGTCCTCCATCTAC	TCGTCTATGTCTTTCATTTGCTT
Chr13	15.6	Satt252	Satt252_F	Chr13	16454076	16454098	Satt252_R	Chr13	44343869	44343853	AATTTGGATTAATTAAATTTATG	CTCGGTCCTCTCAAATAAGGTCTC
Chr13	20.3	T001304982m	T001304982m_F	Chr13	16849396	16849374	T001304982m_R	Chr13	16849159	16849182	TGAACCATATGCAACTGACTTTG	AAGTGAATCGTTAGCATTCTTTGA
Chr13	22.1	s017700544-2	s017700544-2_F	Chr13	17033970	17033948	s017700544-2_R	Chr13	17033772	17033794	TCAGGGACTAACATAACCAATGC	TTCTGTTACCTTGGTACTTCTGG
Chr13	25	s010002208-2	s010002208-2_F	Chr13	18303034	18303011	s010002208-2_R	Chr13	18302850	18302870	AAATGTAGAGGACTAGTGGTGGAG	TTTATCTCTCCCAAGATTTCG
Chr13	26.7	s010001660-2	s010001660-2_F	Chr13	18852758	18852736	s010001660-2_R	Chr13	18852599	18852623	GGATTATTCGGAGGTGACTCTTT	AACAAGGAGAAGAATAAACTCTCAG
Chr13	27.7	C13-BARC-032373-08957	C13-BARC-032373-08957_F	Chr13	19157559	19157540	C13-BARC-032373-08957_R	Chr13	19157469	19157489	CCACCTAACTTTCAAAATAC	GGTCTCTGTATTTCTATGTTG
Chr13	28.5	Satt206	Satt206_F	Chr13	19577977	19578001	Satt206_R	Chr13	19578176	19578154	CATGTGAAAAGAATGAGATTATGTA	TCCAAACTCATCCTTAAGGTATT
Chr13	28.8	Sat_298	Sat_298_F	Chr13	19950573	19950555	Sat_298_R	Chr13	19950299	19950317	CGTCGAAGCAAAAATTAAA	GCGAAACCCACAAAGCATA
Chr13	29.9	C13-BARC-025291-06469	C13-BARC-025291-06469_F	Chr13	20409667	20409686	C13-BARC-025291-06469_R	Chr13	20409755	20409736	AGCGATAGTGTTGCCAGAGC	TTTGATCCTCCATGGCCAAC
Chr13	30.1	s010000061	s010000061_F	Chr13	20451307	20451284	s010000061_R	Chr13	20450913	20450936	TGTTCTTGAGAATTTGTTCGGTAA	TGACTTTGTCTACACCAAACATCC
Chr13	30.5	s010000016	s010000016_F	Chr13	20496106	20496083	s010000016_R	Chr13	20495633	20495650	AATGCTCCTAAGTGTTGGTATCAC	CTTCCGGCCATGAGGATT
Chr13	30.9	Sat_240	Sat_240_F	Chr13	20519633	20519607	Sat_240_R	Chr13	20519410	20519437	GGCAGAAGTCTAATGAATGTGAAATGA	GTTGTGACCGAAATAGATGTTATTTAAT
Chr13	30.9	Satt659	Satt659_F	Chr13	20572260	20572279	Satt659_R	Chr13	20572422	20572398	GCTCAACTTCGTGTAACAAG	CATCGGTAACTATCTAATATTCGTA
Chr13	34.4	T001301136s	T001301136s_F	Chr13	20728204	20728182	T001301136s_R				TGGCCACTTTACCATCAGATATT	GATTGTGACTATCCCAGTGTGGT
Chr13	36.1	T001301019l	T001301019l_F	Chr13	20845650	20845628	T001301019l_R	Chr13	20845294	20845318	CTACAGACAAGAACCGCCATAAC	AAATGTGTTAGAGTGTACGTGTTCC
Chr13	37.5	s008400599	s008400599_F	Chr13	21107077	21107099	s008400599_R	Chr13	21107402	21107378	ATAAATGCGTCCCTGAAATATGA	GCAAAGATTAAAGTTTGACAAGGAA
Chr13	40.2	s008401007	s008401007_F	Chr13	21516809	21516831	s008401007_R				AAATAGCCTACATGACACGGAGA	AAACGAATCGGAGTAGCAAATTA
Chr13	44.6	T001300005s	T001300005s_F	Chr13	21855169	21855147	T001300005s_R	Chr13	21854960	21854982	TACTTAAGAGAGCAATCGGGAAA	ATCAAGAATTACAACGAGAGAAA
Chr13	45.6	T001320432s	T001320432s_F	Chr13	21984390	21984413	T001320432s_R	Chr13	21984482	21984460	TGACTTTGCTAAGTAGCTCTCCAA	TGACACTTACGTTGCAAGTCTTC
Chr13	47	s034100101r	s034100101r_F				s034100101r_R	Chr13	22100448	22100470	TCACAAATTCTGCTGTGTAGGAT	CGTAGCCTAAATAAAGCACTAAA
Chr13	47.5	s008401806	s008401806_F	Chr13	22315505	22315527	s008401806_R	Chr13	22315708	22315686	CGTGAGTCCATGCATTACAATTA	TAAGCGTGTGTTAGGAGGCTATC
Chr13	50	T001320982l	T001320982l_F	Chr13	22536002	22536024	T001320982l_R				TCCAAATTTATACTGCAACATGC	GCATATTTAATTTGAATGGTAATG
Chr13	50.8	T001321054m	T001321054m_F	Chr13	22607615	22607637	T001321054m_R	Chr13	22607922	22607900	ATGTTAACTGCTCCTAGTGCTGC	TAAACTCATCCTTCCAGCAATGT
Chr13	53.3	s008402420	s008402420_F	Chr13	22928615	22928637	s008402420_R	Chr13	22928900	22928878	CAGGACATGGCAACTACCTTAAA	TGCTTGCTTGTAGATTGCATAAA
Chr13	54.9	Sat_309	Sat_309_F	Chr13	23682568	23682595	Sat_309_R	Chr13	23682873	23682846	AACGGATATATACCCATAAATTTTCATG	TCATCCAATATAACAATTGTTAAAGTCA
Chr13	56.5	T001322331l	T001322331l_F	Chr13	23815699	23815721	T001322331l_R	Chr13	23816073	23816049	TCATTTCATCAGCCTTGAAACTT	TGCATTGAGATATCGTAATTGTCTC
Chr13	58.4	T001322429l	T001322429l_F	Chr13	23912461	23912483	T001322429l_R	Chr13	23912889	23912867	CAGGTTTGGTGGAAGTTAGTTCA	AAACGAGTTTGGCAATGCTACTA
Chr13	62	T001322733m	T001322733m_F	Chr13	24218395	24218417	T001322733m_R	Chr13	24218694	24218672	TGGCTTAAATGGACATAGGACTG	TTGACCAAACTTCTGTTGACCTT
Chr13	65.3	Satt595	Satt595_F	Chr13	24602095	24602076	Satt595_R	Chr13	24601881	24601897	GATGGGAAGCAAACAAGAAG	AACCCCCTCCCCTAAAT
Chr13	67.2	T001323280m	T001323280m_F	Chr13	24765478	24765500	T001323280m_R	Chr13	24765826	24765804	TTTCCTCATTATTCACCTGTTCG	CCGGCCTATGACTCAAATCTTAT
Chr13	70.5	s017600842	s017600842_F	Chr13	25361881	25361904	s017600842_R	Chr13	25362173	25362151	AAGCCTACCCTCTTTGTAAGAGTC	TGTGGTTCCCTATTCTTTCTTGA
Chr13	74.1	s017601243	s017601243_F	Chr13	25763570	25763592	s017601243_R	Chr13	25763909	25763887	AAATGATATTTGGATGAAGAGCG	CTAATAGCAACACCCAAACATGC
Chr13	74.9	s017601245	s017601245_F	Chr13	25765711	25765733	s017601245_R	Chr13	25766011	25765990	ATTGTGAACGTGTGTGATTTCTG	CACAATCATCGTGTGACGTAAA
Chr13	74.9	s020000942	s020000942_F	Chr13	25784318	25784295	s020000942_R	Chr13	25783989	25784014	AACACAATGGTTCCTAATAATGTAAA	GGTTTGATTCATAATAGAGTTTGTGA
Chr13	74.9	s020000912	s020000912_F	Chr13	25814257	25814235	s020000912_R	Chr13	25814095	25814117	AGATTCCGCGTCACTTGTATAAT	ACATAACATTGCAGCATCACACT
Chr13	75.7	s020000882	s020000882_F	Chr13	25844390	25844372	s020000882_R	Chr13	25844029	25844051	AATGCTCCAGCTTGGTGTC	TGCCAGAGAGGATAGCTAATACG
Chr13	75.7	Satt663	Satt663_F	Chr13	25935893	25935875	Satt663_R	Chr13	25935687	25935710	TCATGCAATGTTGTATAAT	ACTGCAGATAACTTGACTGGTAGT
Chr13	76.2	C13-BARC-045205-08910	C13-BARC-045205-08910_F	Chr13	26195300	26195319	C13-BARC-045205-08910_R	Chr13	26195395	26195374	TCCGTAATTATGGTCCCTTC	GTCTCTAATTTAAAATGAGAGG
Chr13	78.9	s020000149	s020000149_F	Chr13	26577982	26577960	s020000149_R	Chr13	26577668	26577691	AAATAGAGTGAACGGAGGAGGAG	TGTTCCCAACAAAGTGTTAGAGAG
Chr13	78.9	s020000125	s020000125_F	Chr13	26601337	26601316	s020000125_R	Chr13	26601015	26601037	TTGCAATCATTATCCACCCATA	CAACAAAGGAATGTTGGGTATGT
Chr13	79.4	s045000017	s045000017_F				s045000017_R				TTTGTTGGACTCAAATCAAGAGTG	GACCTAAATGCCATGACTCAAGA
Chr13	81.6	s026700161	s026700161_F				s026700161_R				TTCATGCTTTGTTTGAAGACGTA	CAATGATAACCCATTGAATCCAC
Chr13	84.3	Sat_229	Sat_229_F	Chr13	26987543	26987516	Sat_229_R	Chr13	26987290	26987317	TGTGCTACTTCACATCTTGAGAGAAAGA	AGGGTTTAGAAAAAGATTCACCAAATAT
Chr13	87.3	T001326098m	T001326098m_F				T001326098m_R	Chr13	27283021	27283003	TTTGTTGGTGAACGGTACCTAAT	CTGACAAGTGACAATTAGGCCAT
Chr13	87.6	C13-BARC-029167-06103	C13-BARC-029167-06103_F	Chr13	27368274	27368293	C13-BARC-029167-06103_R	Chr13	27368354	27368335	ACATAGATCGGCATGGAGTC	CTATCTGTGCAATCAATAGG
Chr13	89	Sat_234	Sat_234_F	Chr13	27656063	27656036	Sat_234_R	Chr13	27655729	27655756	ATGCGTTTAATAAGTTTTGAAAAATGCC	GAAACCATCCTTATATGTCAATTGCTCA
Chr13	91.9	GMES0895	GMES0895_F	Chr13	28130478	28130459	GMES0895_R	Chr13	28130129	28130148	CCTTCTCCTTCTCCGGTTCT	TAGCAGGCATTACTCCTCCG
Chr13	92.9	GMES0864	GMES0864_F	Chr13	28323875	28323856	GMES0864_R	Chr13	28323649	28323668	ACCACCTTCACTCGCAAAAC	GGCGAAACTGCCTAATGTGT
Chr13	96.2	GMES0039	GMES0039_F	Chr13	28804801	28804820	GMES0039_R	Chr13	28805014	28804995	CTCTCTTTCGCTTCATGGCT	AAATCGTGGAGGTGTTGCTC
Chr13	96.2	Satt114	Satt114_F	Chr13	28911931	28911948	Satt114_R	Chr13	28912038	28912018	GGGTTATCCTCCCCAATA	ATATGGGATGATAAGGTGAAA
Chr13	96.8	GMES3937	GMES3937_F	Chr13	29166228	29166209	GMES3937_R	Chr13	29166065	29166084	AGGTACTGGACACTCGGTGG	GGAGAAGGCCTCATCAACAG
Chr13	96.8	GMES0734	GMES0734_F	Chr13	29235262	29235243	GMES0734_R	Chr13	29235130	29235149	CTCTTCACCCACCAGCAAAT	AGTAGGAGGCTTAGCAGGGG
Chr13	97.4	Satt334-2	Satt334-2_F	Chr13	29608551	29608527	Satt334-2_R	Chr13	29608317	29608341	TGGATTGAATAATTTTTGTGTTTGA	TGCATTTATGTTTAGTCAATTCAGG
Chr13	98.2	s017200782	s017200782_F	Chr13	30235371	30235349	s017200782_R	Chr13	30235164	30235186	CGAAAGTTAGCTCAACAGACGTT	AAGACTAAACACTCTCTCGCTGC
Chr13	98.9	s017200718	s017200718_F	Chr13	30300056	30300031	s017200718_R	Chr13	30299823	30299845	CAAGACAATAATGCTGTAAACATAAA	CGTCGACACGTGTATCATTGTAT
Chr13	99.8	C13-BARC-029683-06320	C13-BARC-029683-06320_F	Chr13	30831004	30830985	C13-BARC-029683-06320_R	Chr13	30830910	30830929	GGTGCCTAAGGATGTTTTGG	GACCTAATCCGACATGATTG
Chr13	101	s017200003	s017200003_F	Chr13	31008772	31008750	s017200003_R	Chr13	31008489	31008511	TAGATGATTCACATGTTTGACGC	TTATTTGTATGGAGGCTGGCTTA
Chr13	101.6	s003000073-2	s003000073-2_F	Chr13	31093857	31093876	s003000073-2_R	Chr13	31094018	31093997	TACCTAGCTGATGCGTGATCATA	TTAATGCAATACCAAACACACAT
Chr13	101.6	C13-BARC-041141-07916	C13-BARC-041141-07916_F	Chr13	31193045	31193026	C13-BARC-041141-07916_R	Chr13	31192956	31192975	TTTCTACTCCCCTTGTCCAC	CAATGGACCAGAGAGAAATG
Chr13	101.8	C13-BARC-017917-02451	C13-BARC-017917-02451_F	Chr13	31659868	31659888	C13-BARC-017917-02451_R	Chr13	31659966	31659949	GAAGTTACCTGAAGGATATTC	AGAGCTTCTTCAACTCTC
Chr13	103.2	GMES1122	GMES1122_F	Chr13	31886475	31886456	GMES1122_R	Chr13	31886212	31886231	CCAAACCACACACCTCACAC	TCTTCACAGACTCAATGCGG
Chr13	105.3	C13-BARC-015903-02010	C13-BARC-015903-02010_F	scaffold_1223	1309	1291	C13-BARC-015903-02010_R	Chr13	32176405	32176386	GAAAAACTATGTGGTATGG	GAAGCATGCTACTTGCTCTC
Chr13	105.3	GMES2710	GMES2710_F	Chr13	32230960	32230942	GMES2710_R	Chr13	32230739	32230758	AGACGAGTTCGACGACGAGT	TCCTCCACTACCACCACCTC
Chr13	105.7	GMES4780	GMES4780_F	Chr13	32232328	32232310	GMES4780_R	Chr13	32232171	32232190	CTCATGCCTCTCCAGTCTCC	TGAGTGAGCAGAGAAAGCGA
Chr13	105.9	s003001318-2	s003001318-2_F	Chr13	32348695	32348717	s003001318-2_R	Chr13	32348860	32348838	AAACTACTTTGCTCTGTTTGTGA	CTGTATGACATCCACCTATGCAA
Chr13	108.3	GMES1566	GMES1566_F	Chr13	32607166	32607147	GMES1566_R	Chr13	32606956	32606975	ACCCCTCGTCTTTCCTTGTT	GCGTTGGGTGAAACAATCTT
Chr13	108.3	GMES5641	GMES5641_F	Chr13	32633019	32633038	GMES5641_R	Chr13	32633440	32633421	TTATTTTGCCCCTCTGCTTC	TGCAGAAACTGACCATCCAG
Chr13	108.6	Satt335	Satt335_F	Chr13	32720218	32720199	Satt335_R	Chr13	32720059	32720080	CAAGCTCAAGCCTCACACAT	TGACCAGAGTCCAAAGTTCATC
Chr13	110.5	GMES0250	GMES0250_F	Chr13	33139108	33139127	GMES0250_R	Chr13	33139336	33139317	TTTAAAACCCCCTACACCCC	CAGGCCTTCACTATGTGGGT
Chr13	110.5	C13-BARC-025765-05056	C13-BARC-025765-05056_F	Chr13	33204080	33204098	C13-BARC-025765-05056_R	Chr13	33204169	33204150	TCACTATGATGATGAAAAC	ATAAAGTGTGTGGAGACTTG
Chr13	114.3	GMES4664	GMES4664_F	Chr13	34019985	34020004	GMES4664_R				CTTTGTGTTTGTTTTGCAGC	TCTGAGGGTATGTGCCATGA
Chr13	114.3	GMES6737	GMES6737_F	Chr13	34034123	34034104	GMES6737_R	Chr13	34033895	34033912	CAAGCACGGGAGAGATTTTC	CCATCAGTGCCATCAACAAC
Chr13	114.6	Satt362	Satt362_F	Chr13	34076518	34076542	Satt362_R	Chr13	34076766	34076742	TTGTTGTTTCAAATGTATTTTAGTT	GACGGATCATCAAACCAATCAAGAC
Chr13	115.1	C13-BARC-031493-07101	C13-BARC-031493-07101_F	Chr13	34471826	34471845	C13-BARC-031493-07101_R	Chr13	34471918	34471899	TATAGCAGCCAAGAGTGACC	GCTCTGAGATAAGTTGATAG
Chr13	116.2	GMES6605	GMES6605_F	Chr13	34641761	34641780	GMES6605_R	Chr13	34642010	34641991	AACCCCACTTCTTACCACCC	TGGCAGCATCGTTGTTGTAG
Chr13	117.3	Sct_188-2	Sct_188-2_F	Chr13	34766006	34766029	Sct_188-2_R	Chr13	34766370	34766347	CTCGACCTATTAATTCCCACTCAA	GAAGAGTGGGCTAAATTTCGTACT
Chr13	121.1	s003004189-2	s003004189-2_F	Chr13	35203852	35203873	s003004189-2_R	Chr13	35204055	35204033	AATAAAGCTTCTTGCGGATTGA	GTTACCCACGTCATTGGAAACTA
Chr13	121.6	C13-BARC-027502-06599	C13-BARC-027502-06599_F	Chr13	35433433	35433414	C13-BARC-027502-06599_R	Chr13	35433348	35433367	TGCATGTTAAGTGGAGACAG	ATCAAGAGGAACGGTGAAGG
Chr13	124.9	s003004926-2	s003004926-2_F	Chr13	35936646	35936668	s003004926-2_R	Chr13	35937006	35936984	ACCACTTGTAACGTTAGACCGAA	GCTCATTTAATGTTGAAGTTGCC
Chr13	125.9	GMES4860	GMES4860_F	Chr13	36160625	36160606	GMES4860_R	Chr13	36160378	36160397	TTTCAACCTTTTCAAACGCC	GGTTCACAAGGGAGATCACG
Chr13	126.5	GMES4020	GMES4020_F	Chr13	36416506	36416487	GMES4020_R	Chr13	36416288	36416309	CAATGCTGTCTTGCAGTGCT	CACAACCTGACATTCAAGGAAA
Chr13	126.5	C13-BARC-042673-08344	C13-BARC-042673-08344_F	Chr13	36427197	36427216	C13-BARC-042673-08344_R	Chr13	36427275	36427256	TTGATCACGGGTGAAACTCC	GGAACTTGAACCAGGAAACC
Chr13	127.3	C13-BARC-041127-07909	C13-BARC-041127-07909_F	Chr13	36627652	36627671	C13-BARC-041127-07909_R	Chr13	36627727	36627708	TACCCTTAAGTAGATGAGGT	CAGCAAAAGGCTCCACTTTC
Chr13	130.1	GMES0517	GMES0517_F	Chr13	37271394	37271413	GMES0517_R	Chr13	37271668	37271649	TTGCTGACTCACCCACTGAG	GGCAATTGATCCAACATGAA
Chr13	135	T001336798m	T001336798m_F	Chr13	37936714	37936736	T001336798m_R	Chr13	37936987	37936965	TATCCTTGTCAAACTGCAGTCAA	GTCTTCTCTGATCAACAAGGTGC
Chr13	137.8	s027600022	s027600022_F	Chr13	38514517	38514495	s027600022_R	Chr13	38514258	38514280	CTACATATGCATTCGGCATACAA	TAGGTGTTATCCATCTTTCACGG
Chr13	138.4	s033000025	s033000025_F	Chr13	38642569	38642547	s033000025_R	Chr13	38642218	38642239	AAAGTCAAGAGGGATGAAAGCAT	CCATACTATTTGATTCTGGGCAA
Chr13	142.2	Satt554	Satt554_F	Chr13	39251180	39251200	Satt554_R	Chr13	39251431	39251411	ATATGCTTTGTAAGAAAATTA	CAAGCCCAAATATTACAAATT
Chr13	144.6	Satt657	Satt657_F	Chr13	39734001	39734018	Satt657_R	Chr13	39734254	39734234	CATTTGGACTTTTACTTC	ACGATGTTAATTGGTAGAATC
Chr13	147.2	T001338938l	T001338938l_F	Chr13	40112176	40112198	T001338938l_R				AGATCCTTTCTCGAAGTGCAAAC	GATAGGAGATAACCACCACTTATTT
Chr13	147.2	T001338956s	T001338956s_F	Chr13	40130477	40130496	T001338956s_R	Chr13	40130655	40130633	GAGGAGGCAAGATGATCCAA	CGACGGATCGATCAAGTTAAAGT
Chr13	148.9	T001339285m	T001339285m_F	Chr13	40462054	40462076	T001339285m_R	Chr13	40462393	40462371	CAAAGCTTGCTCCCTACATTAAA	AAATAGTTCATGGACAGCAAATG
Chr13	152.7	T001339638m	T001339638m_F	Chr13	40814901	40814923	T001339638m_R	Chr13	40815230	40815206	CCAAGTGGATGTGACAGGTAAAG	TCCGTATTATCTATCGCATTAGTCA
Chr13	154	LFsoy7	LFsoy7_F	Chr13	41160054	41160035	LFsoy7_R	Chr13	41159675	41159694	GTTTCAGTCAGGCTCAGACC	ACAGATCCAGACGTTCCTGG
Chr13	158.1	AW756935	AW756935_F	Chr13	41605191	41605175	AW756935_R	Chr13	41604945	41604966	GCTGGTGATTGTGTAAT	TAATATAGTTTTGTATTGAAAT
Chr13	162.1	T001340717l	T001340717l_F	Chr13	42161148	42161170	T001340717l_R	Chr13	42161527	42161506	CGAACGTTTCATACAAGGATCTC	GTTGTTCAACGGCCATTTACTT
Chr13	163.8	T001340960m	T001340960m_F				T001340960m_R	Chr13	42398361	42398339	CGATATATACTCATCATGCCGAT	ACACCTCACTTTCGGTAAACTTG
Chr13	165.4	T001341102s	T001341102s_F	Chr13	42539891	42539913	T001341102s_R	Chr13	42540045	42540023	TCCATATAGGCAAATTAGCAAGC	CCCATCTAGGGTTATCAAATCAG
Chr13	167.4	T001341265l	T001341265l_F	Chr13	42703052	42703074	T001341265l_R	Chr13	42703430	42703408	TTCTTGATTCGTTCTGTGATTGA	TGCTCTTGTTGATTTGGACTATG
Chr13	170	s013400530-2	s013400530-2_F	Chr13	42864696	42864718	s013400530-2_R	Chr13	42864888	42864866	CGAAATAACCAAATTGAGCATTC	TAATTGCTCATAGTCGATTTCTA
Chr13	174.3	GMES3245	GMES3245_F	Chr13	43287818	43287837	GMES3245_R	Chr13	43288147	43288128	GGAAATTTGGAAATGCGAGA	ATCGCATCGAATGAGAATCC
Chr13	174.3	Satt656	Satt656_F	Chr13	43323493	43323517	Satt656_R	Chr13	43323641	43323617	TACTAAAAATGGCAATTATTTGTTG	TGTTTCAGTATTTGGATAATAGAAT
Chr13	174.5	GMES3230	GMES3230_F	Chr13	43525175	43525156	GMES3230_R	Chr13	43524934	43524953	GATTGTCATGGTTTCGGACC	AGTCTCCCGATTTCAAGGGT
Chr13	175.1	GMES6918	GMES6918_F	Chr13	43796737	43796763	GMES6918_R	Chr13	43796833	43796814	CCACAATCTAAGTAAGTGTTGAGAGAA	TTGTGACCCTTGTTTCCTCC
Chr13	177.3	s013401911-2	s013401911-2_F	Chr13	44232319	44232343	s013401911-2_R	Chr13	44232467	44232446	TGCGTGTTATTTCTCTCATCTTACA	AGAAAGACACAGGCTATCCACC
Chr13	182.1	Satt395	Satt395_F	Chr13	45319000	45319019	Satt395_R	Chr13	45319274	45319257	CGCGCTAGTTGAATGAATGT	CATTGAGGAATTTTTTAT
Chr13	182.1	GMES4587	GMES4587_F	Chr13	45327720	45327701	GMES4587_R	Chr13	45327471	45327490	TCCAAAATGTTGGGCAGAAT	TGCTGCTGTTGTTGTTGTTG
Chr13	183.7	s025500044	s025500044_F	Chr13	45816658	45816636	s025500044_R	Chr13	45816308	45816330	GCATCAAGTAGCATATCAAAGGG	GTGAGGTTTGATTGATGTCCTGT
Chr14	0	T001400036s	T001400036s_F	Chr14	41834	41857	T001400036s_R	Chr14	42039	42017	CAGCCTATCCTGTACACAACAATC	CTTGTGATGTTTGGAGACACTTG
Chr14	1.1	Satt577	Satt577_F	Chr14	675325	675348	Satt577_R	Chr14	675436	675411	CAAGCTTAAGTCTTGGTCTTCTCT	GGCCTGACCCAAAACTAAGGGAAGTG
Chr14	1.6	C14-BARC-014457-01379	C14-BARC-014457-01379_F	Chr14	809365	809346	C14-BARC-014457-01379_R	Chr14	809270	809288	GATGGATTATACAGGTATGG	GAAAATCGTCATCATGAAT
Chr14	4.4	GMES0963	GMES0963_F	Chr14	1269194	1269210	GMES0963_R	Chr14	1269334	1269315	AGAGAAGAGAGGAGAGGGGG	AGCGCCTTCACTTCAGACTC
Chr14	5.2	GMES2796	GMES2796_F	Chr14	1327650	1327631	GMES2796_R	Chr14	1352338	1352357	AATGCCAACGCTAAAACACC	GGTCCTGTTCTGTGCCAACT
Chr14	8.1	C14-BARC-024295-04829	C14-BARC-024295-04829_F	Chr14	1872662	1872643	C14-BARC-024295-04829_R	Chr14	1872595	1872614	CAACTGTCCAAGAGCTAGTA	GAGCCAATGTGTGAACTGTG
Chr14	8.5	T001401890m	T001401890m_F	Chr14	1885290	1885312	T001401890m_R	Chr14	1885511	1885489	CAAACCCTGGTCAACCACTATTA	AGTGTTTACGCCTAACTCGATCC
Chr14	12.8	T001402652s	T001402652s_F	Chr14	2652927	2652949	T001402652s_R	Chr14	2653074	2653052	AAATTCCAATCATAAAGCGAGTG	AATTGAAGGAAGGAATTATCCAC
Chr14	13.3	Sat_342	Sat_342_F	Chr14	2958099	2958078	Sat_342_R	Chr14	2957871	2957892	ACTCTGGGGAAAATTAGTTTAG	GAGTCGGGGAGCACTACTTGTC
Chr14	13.6	GMES1204	GMES1204_F	Chr14	3061344	3061363	GMES1204_R	Chr14	3061533	3061514	AGGACCAAGAGCCAGTTGAA	CGCTCCTCTTGTTGTTCCTC
Chr14	13.8	alphaP-AT17.4
Chr14	14.9	GMES1617	GMES1617_F	Chr14	3766011	3766030	GMES1617_R	Chr14	3766393	3766374	TCCCAGAAACATCGTCAACA	CGGATAGTGCCCGTAACACT
Chr14	18.5	GMES2219	GMES2219_F	Chr14	4542749	4542768	GMES2219_R	Chr14	4542912	4542893	AGAAACCATGCTTCTCCGAA	ACGGTTCAAAAATCACTCCG
Chr14	20.2	T001404790l	T001404790l_F	Chr14	4876268	4876290	T001404790l_R	Chr14	4876632	4876611	AAAGAATTGTTGAGGAGAGAAGC	GTGTTTGGAAACTCGTTACGGA
Chr14	22.7	C09-BARC-039595-07510	C09-BARC-039595-07510_F	Chr14	5114890	5114909	C09-BARC-039595-07510_R	Chr14	5114979	5114960	AATCTGGATTAGGGAGGTGC	GTGCCGTGTATTGGATATTG
Chr14	24.9	Sat_287	Sat_287_F	Chr14	5290075	5290053	Sat_287_R	Chr14	5289821	5289848	CATTCCCTATTTTTTAGAATGAGTAAAT	CCATAATCAGCATGCACACCTTATATGG
Chr14	27.9	T001405527l	T001405527l_F	Chr14	5638988	5639010	T001405527l_R	Chr14	5639333	5639310	ACGCTGATATCTGTTGTCTTTCC	TGTACAGCATAGAAGACACAAAGG
Chr14	31.2	GMES1593	GMES1593_F	Chr14	6173820	6173839	GMES1593_R	Chr14	6173998	6173979	AGGAGATTGGAGAGGGCATT	CAATAGCAACTCAGGTGGCA
Chr14	33.4	s017901076-2	s017901076-2_F	Chr14	6478312	6478290	s017901076-2_R	Chr14	6478121	6478143	GCCAATCATTGTCTTTCAAACTC	AAGCCTAGCCTTCTCATGTTCTT
Chr14	36.4	T001406633m	T001406633m_F	Chr14	6742913	6742935	T001406633m_R				GCAGAGTGAAATGACTCAGGTCT	AGTACATTGAGTGTTCCAGCCAT
Chr14	38.6	T001407042m	T001407042m_F	Chr14	7150713	7150736	T001407042m_R	Chr14	7151038	7151016	TCTTCATAATTCTTCTTGTCGGAA	AGAACTGTCCACGTAACCCATTA
Chr14	43.1	s017900038	s017900038_F	Chr14	7519597	7519575	s017900038_R	Chr14	7519261	7519283	TGATTTCTGACCGATGAATACCT	TTAATGGACGTTCGTATCAACAA
Chr14	46.8	T001407710m	T001407710m_F	Chr14	7815499	7815521	T001407710m_R	Chr14	7815774	7815752	TCATACACGTATAAAGGTTTGCT	ATTCATTGAGAAGGAGTTGTGCT
Chr14	49.5	T001407954s	T001407954s_F	scaffold_28	297018	296998	T001407954s_R				GTTCACCTTACCACCACCAAA	AAGATGTAACTCTCACTAGTCTTGTGTAT
Chr14	50.6	s020700146	s020700146_F	scaffold_28	128996	129018	s020700146_R	scaffold_28	129317	129295	ATGCACAACGATTTCTGGTAAGT	CAAAGAATCGATTTGGAATTCAG
Chr14	53.3	Satt416	Satt416_F	Chr14	8436339	8436314	Satt416_R	Chr14	8435984	8436010	TATAGCCCAGCAAAAAAAAACAGAGAT	ATCAAAACCGACCAATGAACAAAAAAA
Chr14	59.2	T001409417m	T001409417m_F	Chr14	9210600	9210622	T001409417m_R	Chr14	9210923	9210901	CAAAGATTAGTCATCGGCAGAAC	AACAATTCCTGACAGACACTTGG
Chr14	60.4	T001409860m	T001409860m_F	Chr14	9654403	9654425	T001409860m_R	Chr14	9654613	9654592	AATTTAGGTCATTACGATCGGCT	CCAGCACGTAAACATTGCTAAA
Chr14	61.7	T001411151m	T001411151m_F	Chr14	10945604	10945629	T001411151m_R	Chr14	10945818	10945796	CATCAATTACTAGCTTAGCCTCTTCA	TTTATCAGCAGCTAGCACTCTGT
Chr14	61.7	s007403816-2	s007403816-2_F	Chr14	11875094	11875116	s007403816-2_R	Chr14	11875280	11875255	TGAGTCAGTTCAACGATGACTTT	TGTGAATAGAGCATCAATAATTTGAA
Chr14	63	Sat_355	Sat_355_F	Chr14	13587720	13587696	Sat_355_R	Chr14	13587514	13587538	ATAACACTAAATGACCAGCAGGATT	GAGCCAAGTATCAAACCAAAACAAC
Chr14	63.8	T001418240m	T001418240m_F	Chr14	22373532	22373554	T001418240m_R	Chr14	22373746	22373724	CCCTCAGGGACTAAATTCTCCTA	AATGGTGTAGCTTACTAGCGCAC
Chr14	64.9	GMES4127	GMES4127_F	Chr14	26042606	26042627	GMES4127_R	Chr14	26042808	26042789	CAGTGCTACATAGGAGGTGCAT	GGGCACAGCTCCATTCTAAG
Chr14	64.9	GMES0016	GMES0016_F	Chr14	28514619	28514600	GMES0016_R	Chr14	28514396	28514415	TCAACGAACACAGTACCCCA	ACCATTTCCACAACCTCAGC
Chr14	64.9	GMES5996	GMES5996_F	Chr14	28987983	28987964	GMES5996_R	Chr14	28987541	28987558	TGGATTTTACCCCAATGGAA	CAATGATCCACTGCCTTGTG
Chr14	65.2	T001425271l	T001425271l_F	Chr14	29394202	29394224	T001425271l_R	Chr14	29394547	29394525	ATATTAAGCTCGTAGTGTTGGCG	TTTGTCACACAACAATTATGCAC
Chr14	65.4	s004007100	s004007100_F	Chr14	30238512	30238490	s004007100_R	scaffold_522	5466	5444	TGAACATCAGTTGGATTCCATAG	TGTGCCCTTGATATCTGCTTTAC
Chr14	65.4	Satt601	Satt601_F	Chr14	31286161	31286186	Satt601_R	Chr14	31286339	31286318	CCTACGCAAGTAACATTGGTTGTCAT	GCTAAAACGTATTAAATTAAGA
Chr14	70.7	s004002046	s004002046_F	Chr14	35345277	35345255	s004002046_R	Chr14	35344964	35344986	ACATCATGGATTATGTCACGACC	GGCCAGGGTAGTAATAGGCTTAG
Chr14	70.7	T001435717m	T001435717m_F	Chr14	18889235	18889257	T001435717m_R	Chr14	18889522	18889500	GGTGATTTGTGAAGCAAACTGTA	CATCGTGAGGAGTTGTGGTTAAT
Chr14	70.7	Satt556	Satt556_F	Chr14	38861141	38861158	Satt556_R	Chr14	38861297	38861280	ATAAAACCCGATAAATAA	TTGTGCACCTTGTTTTCT
Chr14	70.7	s003600119	s003600119_F	Chr14	39068156	39068178	s003600119_R	Chr14	39068354	39068331	TGATTGGGCATGTAAGTCCTAGA	TTCATCAAACACTACACAAACACG
Chr14	70.7	s003600885	s003600885_F	scaffold_23	88011	88033	s003600885_R	Chr14	39824566	39824544	CGTTAATTAGTCTAACCCGCGTA	GATGTTGATGCTGTGACATCCTA
Chr14	71.8	s003601923	s003601923_F	Chr14	40859318	40859340	s003601923_R	Chr14	40859475	40859453	AAATTCAGTTGTACTTCACGCAT	TTGCAGGTGATTCGACTTATACC
Chr14	71.8	s003602279	s003602279_F	Chr14	41216038	41216060	s003602279_R	Chr14	41216428	41216406	AACTTATAGAGGATTGGGTCAAA	GCACAATTTGGAATGTTTCATTT
Chr14	72.1	s003602737	s003602737_F	Chr14	41673425	41673450	s003602737_R	Chr14	41673813	41673791	TTCAAATCTATGGGATATAAACATTC	TTCCCTTTGTTGCATTCTCTTTA
Chr14	73	s003603136	s003603136_F	Chr14	42073465	42073487	s003603136_R	Chr14	42073628	42073611	TCCAATCGGTCGTTTAGTGTTAT	GATGCTTAAGTAGTCAAGTTGTTGG
Chr14	75.9	s003604395-2	s003604395-2_F	Chr14	43323688	43323710	s003604395-2_R	Chr14	43323837	43323813	GTCCATGTGTTGACTTGTAAAGC	CCAGAATTCTTATTACACAATGCAA
Chr14	76.8	s003604717-2	s003604717-2_F	Chr14	43645880	43645902	s003604717-2_R	Chr14	43646059	43646038	GATGGAGGGATACCTTGATTCAT	ACCGCTTGATTTGACCAATAAT
Chr14	78.4	s003605092-2	s003605092-2_F				s003605092-2_R	Chr14	44016452	44016427	AAATCAATGTCAAGATAAGATGAGTG	AAACAAACAGACACATATTACTCCAA
Chr14	79.7	T001444884s	T001444884s_F	Chr14	44158530	44158554	T001444884s_R	Chr14	44158702	44158680	TTTATACAATCGTTCAATCTCAACA	GCGTTAACCGTATCCACAAGATA
Chr14	84.2	s003605440-2	s003605440-2_F	Chr14	44366904	44366929	s003605440-2_R	Chr14	44367102	44367080	AAACTTTGGAAGAAGATAAACTACAT	AAATTGAAACGAATGGGTAATTT
Chr14	89.8	T001445242s	T001445242s_F	Chr14	44521536	44521558	T001445242s_R	Chr14	44521745	44521724	CAATGGTGAGGATGAAAGGTAAT	AGGTGCTGATGCCTAATTGTCT
Chr14	92.8	s003605780-2	s003605780-2_F	Chr14	44706146	44706169	s003605780-2_R	Chr14	44706340	44706317	CAACAAACTCTATTCAATTCCGTG	TTTGTGACGTCTTATTCTGATAAA
Chr14	93.7	Satt534	Satt534_F	Chr14	45043431	45043452	Satt534_R	Chr14	45043615	45043597	CTCCTCCTGCGCAACAACAATA	GGGGGATCTAGGCCATGAC
Chr14	95.7	T001446170l	T001446170l_F	Chr14	45449514	45449536	T001446170l_R	Chr14	45449874	45449849	TTTATTGTGGAATCAGGGTGATA	TTTGATCTATGTTCAGTGTCTTATTT
Chr14	100.3	GMES4048	GMES4048_F	Chr14	45886163	45886182	GMES4048_R	Chr14	45886368	45886349	CACTCTGCTCCTCCCTCTTG	TAGGGGGAGAGGGGAAATAA
Chr14	101.9	GMES2363	GMES2363_F	Chr14	46051521	46051540	GMES2363_R	Chr14	46051668	46051649	TCGTCTTGTTCTTCGCCTTC	GTCGCTTCCTCTTCAAAACG
Chr14	106.5	Satt726	Satt726_F	Chr14	46328517	46328538	Satt726_R	Chr14	46328710	46328695	TTTTTAGTATGGATAATGTTTT	AAGGGACAAGAGTGAT
Chr14	108.3	C14-BARC-040821-07850	C14-BARC-040821-07850_F	Chr14	46774311	46774293	C14-BARC-040821-07850_R	Chr14	46774215	46774234	CTGAAATGTGCTTGTAAAG	TTGCCTTGATAAGCTAGAAG
Chr14	108.9	s015600642	s015600642_F	Chr14	46893640	46893661	s015600642_R	Chr14	46893890	46893868	ATAAATTTCCTTGTGATTCCCG	GCTACGTGATGTTTGGAAATGAT
Chr14	109	s015600675	s015600675_F	Chr14	46923909	46923931	s015600675_R	Chr14	46924218	46924196	AAGTTAGATCGGCTGTGTGAAAG	GCAGAATGCACTCAACTAACTTC
Chr14	109.1	s015600697	s015600697_F	Chr14	46946430	46946452	s015600697_R	Chr14	46946732	46946710	CCTCGCGGTTCGTTTATTATTAC	GAACAACGTGAATGACGTAAAGG
Chr14	110	s015600824	s015600824_F	Chr14	47073901	47073923	s015600824_R	Chr14	47074245	47074223	AACATCAATTGGAGTCCCTTAGC	GAGGTCACCTATGAAAGTCCCTT
Chr14	110.5	GMES2238	GMES2238_F	Chr14	47093360	47093341	GMES2238_R	Chr14	47092896	47092915	CGCTATCATCCAATGACCAA	TGCACTGCATGAGGTAGGAG
Chr14	110.5	s015600843	s015600843_F	Chr14	47092944	47092966	s015600843_R	Chr14	47093230	47093208	CAAGATGCGTTTAGAAGCCATAC	AAGTCCCTTTGGTCTTCATCTTC
Chr14	110.7	s015600857	s015600857_F	Chr14	47106906	47106928	s015600857_R	Chr14	47107196	47107176	AGTATGAGATGGGAGACCCAAAT	CCCTGGATTTGAAAGACTAAA
Chr14	111.8	s001505206-2.1
Chr14	112.3	GMES1809	GMES1809_F	Chr14	47592441	47592460	GMES1809_R	Chr14	47592727	47592708	GCAGCCGCTGAAGAAGTTAG	TTGGGTGAAACCATTCTCAA
Chr14	113.9	T001448411s	T001448411s_F	Chr14	47731482	47731503	T001448411s_R	Chr14	47731690	47731665	ATATTTGCACCATTGCATGTGA	AAACTAAACATAGGTTATGAGGTTAG
Chr14	115.3	C14-BARC-012703-00380	C14-BARC-012703-00380_F	Chr14	47835746	47835726	C14-BARC-012703-00380_R	Chr14	47835649	47835667	CCTCTCACTATATATAGACAC	CCCCTCCAATAAACACTCTA
Chr14	116.9	T001448628m	T001448628m_F	Chr14	47948920	47948942	T001448628m_R	Chr14	47949238	47949216	GCTACGAGGAATCTACCTGGTTT	AAATGTCAAATTCAAACGTTGCT
Chr14	119.3	T001448722m	T001448722m_F	Chr14	48042509	48042531	T001448722m_R	Chr14	48042814	48042792	GGAGAGAGAGCTAGAACAGGGTC	TATTATGGCCAGTTTAATTTCCG
Chr14	120.4	T001449696l	T001449696l_F	Chr14	48076257	48076235	T001449696l_R	Chr14	48075878	48075900	ATAATTTCATCTACTCCGTGGCA	TAATGAGGAAGTCAGGATGAACG
Chr14	120.4	T001449699l	T001449699l_F	Chr14	48073032	48073010	T001449699l_R	Chr14	48072668	48072690	TGAAGGTACATCCTAAGAATCCG	ATGGTTAAGATCGTGAGTTGAGG
Chr14	120.8	T001449676m	T001449676m_F	Chr14	48096087	48096065	T001449676m_R	Chr14	48095862	48095883	ACGACAAGATGATGGTCAGATTT	ACGGGTACACACGAGCTTTAAT
Chr14	122	GMES0104	GMES0104_F	Chr14	48218169	48218148	GMES0104_R	Chr14	48218058	48218081	TGGGTTAGGTCAATTCAGATCA	AAAGGAGCTTCTTCTTTTAAGACC
Chr14	122	T001449533s	T001449533s_F	Chr14	48239370	48239348	T001449533s_R	Chr14	48239219	48239241	ACTTTCTCCGGTAATCATCCTCT	AAATCCAGTTAAACCTACAACACTTT
Chr14	124.4	T001449387m	T001449387m_F	Chr14	48384832	48384810	T001449387m_R	Chr14	48384574	48384600	AATATGCAAGGTCAGTCCAAGAA	GGGTTGACTTAATAATGAGTGAGACTT
Chr14	126.5	T001449159l	T001449159l_F	Chr14	48612951	48612929	T001449159l_R	Chr14	48612572	48612598	TTCGTAAGAATTTATCCATCTGT	CTTGTTGTATTATCTTTCTTATGATCT
Chr14	128.8	T001448885l	T001448885l_F	Chr14	48886827	48886805	T001448885l_R	Chr14	48886485	48886507	GGAGTCAATTGAATGGCAAATAC	AAATTAATTAACCCACATCCACA
Chr14	128.8	T001448893l	T001448893l_F	Chr14	48879337	48879315	T001448893l_R	Chr14	48878958	48878981	ATTGATAATGAACCTTGCCCAAT	CAAATTAACATCCTTACGTTCGAT
Chr14	128.8	s004000269	s004000269_F	Chr14	48776797	48776775	s004000269_R	Chr14	48776450	48776472	GTTTCCCTACCAACAAACCAAAT	ATGTACGTGCACCAGAAACAAAT
Chr15	0	T001500125s	T001500125s_F	Chr15	123822	123846	T001500125s_R	Chr15	124009	123985	TTTGGAAAGAGAGAAGACTATGAAA	CGAATTACTGCGTATAGCTTACTTT
Chr15	1.4	T001500358l	T001500358l_F	Chr15	356718	356742	T001500358l_R	Chr15	357141	357116	CTTTCAAGATCTAACTCACTAAGAA	GGAATGTAAATCTCAAATGTAAGAAG
Chr15	3.3	C15-BARC-030171-06819	C15-BARC-030171-06819_F	Chr15	754929	754948	C15-BARC-030171-06819_R	Chr15	755009	754990	AGAAGCTAAGTACTCCCTCG	ACTCTCAATCTCTAAGGAGG
Chr15	4.3	Satt575	Satt575_F	Chr15	876299	876319	Satt575_R	Chr15	876494	876474	GCTAATTTTGTTTATAGGAAT	CCGCTACCATCTCGGAGGACT
Chr15	5.3	GMES1424	GMES1424_F	Chr15	920094	920113	GMES1424_R	Chr15	920286	920267	TCTTCGGTGTTGCAATCAAG	ACAACCTTCAAACTGGCTGG
Chr15	9.9	GMES0357	GMES0357_F	Chr15	2353821	2353840	GMES0357_R	Chr15	2353990	2353971	CACACCCTTTTAGCTGCACA	GAGGTATTGTCTTTGGGGCA
Chr15	10.1	C15-BARC-013501-00503	C15-BARC-013501-00503_F	Chr15	2400580	2400561	C15-BARC-013501-00503_R	Chr15	2400490	2400509	CTGATACCTAGGTCAGCAAC	TTCCACTGGATGAAACATGC
Chr15	10.1	GMES0779	GMES0779_F	Chr15	2420459	2420478	GMES0779_R	Chr15	2420688	2420669	CCCATATGATCTCGTCGTCC	GTAGCAATACCAGGGCAAGG
Chr15	10.7	Satt411	Satt411_F	Chr15	2516746	2516769	Satt411_R	Chr15	2516840	2516818	TGGCCATGTCAAACCATAACAACA	TTGAAGCCGCCTACAAATATAAT
Chr15	11.6	GMES2824	GMES2824_F	Chr15	2841820	2841801	GMES2824_R	Chr15	2841547	2841566	TTAATTACTCGCATTCCGCC	GAAGAAGCTGCTAAGGGCAA
Chr15	12.9	C15-BARC-017893-02417	C15-BARC-017893-02417_F	Chr15	3308090	3308110	C15-BARC-017893-02417_R	Chr15	3308179	3308160	CAGAATGAGATATTTCTGGTC	GCTGTGTCTTCAATGAAGCC
Chr15	16.2	T001503496l	T001503496l_F	Chr15	3514794	3514813	T001503496l_R	Chr15	3515190	3515168	GCCGAATTTCGTAGATCCAGT	CTCCATTTATGCACGCTATTAGG
Chr15	17.6	Satt720	Satt720_F	Chr15	4154382	4154409	Satt720_R	Chr15	4154648	4154621	CATATACGAAACATATTGTCAAGTTACA	TCATGAGTGGTTTGTTCTATACTTCTAT
Chr15	18.8	C15-BARC-039433-07497	C15-BARC-039433-07497_F	Chr15	4413928	4413947	C15-BARC-039433-07497_R	Chr15	4414007	4413988	ACCAAGAGCTAAGAATCAAG	TGAACTTTCCTGGGAAAGGG
Chr15	20.9	s007003323-2	s007003323-2_F	Chr15	4620984	4620962	s007003323-2_R	Chr15	4620592	4620614	CCAAATCTGCTATCAGTCAATCC	AACGTTATTGTACTCCTTTGGCA
Chr15	24.5	s007002959-2	s007002959-2_F				s007002959-2_R				TGCATCCGGGTTAAATTAAATA	TGAGATGCGCGCAATAAATA
Chr15	29	s007002562-2	s007002562-2_F	Chr15	5380117	5380095	s007002562-2_R	Chr15	5379902	5379924	TTTCGGGAGTACTTCACATGATA	CTTCTCCTCCTTTCTTCTTGGAA
Chr15	30.4	GMES1163	GMES1163_F	Chr15	5694178	5694159	GMES1163_R	Chr15	5693911	5693930	AGGGTCTACTTCGAACGCAA	GGGAAGGCAAAATTCACAAC
Chr15	30.4	GMES1287	GMES1287_F	Chr15	5891796	5891777	GMES1287_R	Chr15	5891607	5891627	CCTTGGCAAGCTCAGAAAAC	TCCAAATTTTGTCCATTCCAA
Chr15	35.1	T001506329l	T001506329l_F	Chr15	6347581	6347604	T001506329l_R	Chr15	6347928	6347906	CCCTTTAACAATTCAAACTTGTGG	TATGGTGGGTTTGAAGAGACACT
Chr15	37.5	Satt651	Satt651_F	Chr15	6823804	6823828	Satt651_R	Chr15	6823960	6823938	TGCTGTCTTTATACGAAGTACACTA	TGGCAATAAATATTCTCACTGAA
Chr15	41.4	T001507357s	T001507357s_F	Chr15	7370747	7370769	T001507357s_R	Chr15	7370925	7370901	ATTTAGAGTGGATCGACCTTTCC	CCTACTCATGTCATGTACCTCAAAG
Chr15	44.7	GMES4794	GMES4794_F	Chr15	7760212	7760231	GMES4794_R	Chr15	7760378	7760359	AAGAAACCAAGCAAAGCCAA	TGATTGGAACACGAAGGTGA
Chr15	48.9	s027100030	s027100030_F	Chr15	8257681	8257659	s027100030_R	Chr15	8257380	8257402	AGAATTATCAATAGCCACCAGCA	TGGCTGCTGAGAAATTAAGAAAG
Chr15	52.5	C15-BARC-040755-07843	C15-BARC-040755-07843_F	Chr15	9120889	9120870	C15-BARC-040755-07843_R	Chr15	9120805	9120823	ATCAACTCTGACCCAGAATC	AATAACATGACTGTTAACC
Chr15	52.8	s018900012	s018900012_F	Chr15	9350498	9350476	s018900012_R	Chr15	9350133	9350155	TGCTAGTTCTTGCTGGTGTGTTA	GCATCGTGAAATTAAGCAATACC
Chr15	52.8	s029300038	s029300038_F	Chr15	9501363	9501386	s029300038_R	Chr15	9501689	9501664	AATACTCTCTCTTCCCTCCTCCTC	GCATATTAATAGTCATACTCAAATCG
Chr15	52.8	Sat_273	Sat_273_F	Chr15	9396602	9396626	Sat_273_R	Chr15	9396819	9396796	TTTCCTAGGGTAAGCACAGTGTATT	GGGTGGAGAGAAAAAGAAAGAACA
Chr15	52.8	C09-BARC-025663-04988	C09-BARC-025663-04988_F	Chr15	9505124	9505143	C09-BARC-025663-04988_R	Chr15	9505214	9505195	AGATCGACGACGACGTTTTG	AGAGAATGGAGAAGAGGTCG
Chr15	53.3	C15-BARC-039087-07438	C15-BARC-039087-07438_F	Chr15	9710601	9710582	C15-BARC-039087-07438_R	Chr15	9710512	9710531	TTAGGATACACATCCCCAGC	GCTACAAAGAGTTGCTTCTG
Chr15	53.3	GMES3926	GMES3926_F	Chr15	9757038	9757057	GMES3926_R	Chr15	9757314	9757295	AAAGTAACAGCAACGACGGC	TCCTTCTCCCATTCTCCCTT
Chr15	55.2	T001509940l	T001509940l_F	Chr15	10092730	10092752	T001509940l_R	Chr15	10093109	10093087	AATCACAGGAGTCAAGGACAGAC	AACAGAGGTATGGTGTCATGGAT
Chr15	55.2	T001510057l	T001510057l_F	Chr15	10209948	10209975	T001510057l_R	Chr15	10210291	10210267	TCCATATAAGTATGTCAATAAGCAGTCC	CAGATCTTATTAAATCCAAGGCAAA
Chr15	57.6	T001510237l	T001510237l_F	Chr15	10387739	10387761	T001510237l_R	Chr15	10388117	10388095	TAATTCCTTTGTGGGACTTGATG	CCATTTGCTTCAGTTCAAATCAT
Chr15	58.5	T001510448l	T001510448l_F	Chr15	10525130	10525152	T001510448l_R	Chr15	10525492	10525470	CCTTCAGGCTATAACAGAGGGTT	CAAATGCACGGTTCTTTCTTTAC
Chr15	59	T001510477s	T001510477s_F	Chr15	10554417	10554438	T001510477s_R	Chr15	10554626	10554606	AAACTGGCTATCAAGTTAAACA	AAGGGTACCATCTTCAGCCAG
Chr15	61.7	T001510617s	T001510617s_F	Chr15	10692466	10692490	T001510617s_R	Chr15	10692635	10692613	TGCTGACTCGAATAGTCAAATTAAA	TAAGGGAACAACCGAACAAGTTA
Chr15	62.9	GMES5916	GMES5916_F	Chr15	10794771	10794752	GMES5916_R				CCAGGGAAAGTTGTCCTCAC	TCCACCCACCTCCAAAACTA
Chr15	64.1	GMES4669	GMES4669_F	Chr15	10999818	10999799	GMES4669_R	Chr15	10999618	10999637	TCTCACTCAACTCGCCAATG	TCTCCGACAAATCCTGGAAG
Chr15	65.5	Satt512	Satt512_F	Chr15	11239651	11239669	Satt512_R	Chr15	11239782	11239759	GCGTGCTAAAGCTCATGAGGAG	GCGGGCGTAATAACTCAAAATTTGTTT
Chr15	69.3	s012000395-2	s012000395-2_F	Chr15	11551052	11551074	s012000395-2_R	Chr15	11551237	11551215	TGTTTATGCATTTGGTTATGATG	CACACTTCCTTACAAACACCACA
Chr15	69.6	C15-BARC-044707-08763	C15-BARC-044707-08763_F	Chr15	11583459	11583478	C15-BARC-044707-08763_R	Chr15	11583552	11583533	GCATAGGTGTGCATGCTTTG	CTTACAATACACAAGTCATC
Chr15	71.8	T001511840s	T001511840s_F	Chr15	11858778	11858803	T001511840s_R	Chr15	11858984	11858962	AAGTGAGTTAGAGATACCATAAGAGA	AATAACAATTACCATTTGCCTAA
Chr15	76.2	s012001055-2	s012001055-2_F	Chr15	12212767	12212789	s012001055-2_R				TGTGAGGAATTGTTGTGAAATGT	AAACACTTTGGGTGTGATCTCTG
Chr15	78.2	s012001347-2	s012001347-2_F	Chr15	12504649	12504672	s012001347-2_R	Chr15	12505142	12505120	GGTATGTTGCTAACCTACTCCTTC	AAATGGAAAGAATAGTAATTGGA
Chr15	82.1	GMES3928	GMES3928_F	Chr15	13106716	13106735	GMES3928_R	Chr15	13106988	13106969	CCACGCGTCCTTCTTCTTAC	ACAGAGCCAACGATGAATCC
Chr15	85.6	Satt573	Satt573_F	Chr15	13653601	13653623	Satt573_R	Chr15	13653757	13653732	GATTTCGATTTGAATATACTTAC	CCTGTGGCTGTTATACTATGCATATA
Chr15	86.6	GMES0025	GMES0025_F	Chr15	14043447	14043428	GMES0025_R	Chr15	14043317	14043331	ATGAGCACCGAAAAGGAGAA	GATACACCTCGGTGGAGGAA
Chr15	90.2	Satt606	Satt606_F	Chr15	14942604	14942623	Satt606_R	Chr15	14942875	14942855	TTCTAAATTAAGCAATTCTT	TGGGTAATAATATTGGTTCAG
Chr15	91.5	GMES3192	GMES3192_F	Chr15	15222808	15222827	GMES3192_R	Chr15	15222988	15222965	AGGGGAAGCAACTCACAGAA	TCAAAAATTTTAAAAGAGAGGGGA
Chr15	93.9	Sat_136	Sat_136_F	Chr15	16631537	16631556	Sat_136_R	Chr15	16631706	16631685	ATCATGCTTCAACACTCTTT	TCCTATTTTTGCCCTTGTATTT
Chr15	98.5	Satt204	Satt204_F	Chr15	17701447	17701425	Satt204_R	Chr15	17701219	17701243	GCCATCTTGTTACAATGCAGGTA	CCTTACTCACTCCATTGGCATAATA
Chr15	99.8	s009500028	s009500028_F	Chr15	19721111	19721133	s009500028_R	Chr15	19721479	19721456	ATATGACAGCTTGGGCATTATGT	CATTCATGTTAATCACGCTAGAAA
Chr15	100.7	C15-BARC-030059-06796	C15-BARC-030059-06796_F	Chr15	20741320	20741339	C15-BARC-030059-06796_R	Chr15	20741398	20741379	AGGATAAAGATCCAAGACTG	CTCTAGGTTGAGGTAAGTGC
Chr15	101.5	Sat_172	Sat_172_F	Chr15	22890174	22890154	Sat_172_R	Chr15	22889973	22889994	TTCTAATTTCCTGACACTGTT	GGACGTAAACGGATAATAAGGT
Chr15	101.5	Satt268	Satt268_F	Chr15	22967939	22967962	Satt268_R	Chr15	22968173	22968154	TCAGGGGTGGACCTATATAAAATA	CAGTGGTGGCAGATGTAGAA
Chr15	101.8	GMES4754	GMES4754_F	Chr15	24136302	24136283	GMES4754_R	Chr15	24136087	24136106	ATCACCACCATCCCGAAATA	GCATGGCATACTGGGGTTAC
Chr15	102.6	s005500687	s005500687_F	Chr15	39638846	39638868	s005500687_R	Chr15	39639179	39639156	CCATTGAGCCATTAGTTAACCTG	CGTCATTTGGTCATATAACACTTT
Chr15	103.4	T001541524l	T001541524l_F	Chr15	42280300	42280323	T001541524l_R	Chr15	42280651	42280629	CAACTAACATTGAGAACGCATACA	TGGAACTAATGTCGGTGCTTTAT
Chr15	108.7	s022900033	s022900033_F	Chr15	44939688	44939710	s022900033_R	Chr15	44940004	44939982	AATGAAGGACAATCACGTAATGC	GAAGGTGATAACAAGCAACAAGG
Chr15	110.6	T001546042l	T001546042l_F	Chr15	46826185	46826205	T001546042l_R	Chr15	46826546	46826524	AAGAGGAGGCATCATCGGTAT	GACCTTAGTGACGATCTCGTTTG
Chr15	115.9	C15-BARC-040087-07660	C15-BARC-040087-07660_F	Chr15	48419439	48419420	C15-BARC-040087-07660_R	Chr15	48419358	48419377	GCCCTCTCTTTTTCCTTTCC	GGGAGGGTAAAGAAAGGAAG
Chr15	115.9	GMES0712	GMES0712_F	Chr15	48498757	48498776	GMES0712_R	Chr15	48499019	48499000	AGGCCTTTGAGAGGAAGAGG	CAAACAAAAACGGAATGCCT
Chr15	119.8	Satt369	Satt369_F	Chr15	49009066	49009090	Satt369_R	Chr15	49009309	49009289	AACATCCAAAGAAATGTGTTCACAA	AGTTCGAATTTCTTTTCAAGT
Chr15	121.1	GMES0145	GMES0145_F	Chr15	49755417	49755398	GMES0145_R	Chr15	49755147	49755166	TGTCTCTTCCCCATCACTCC	GCCTTCCATTAAGGGTGTCA
Chr15	121.4	s023900002	s023900002_F	Chr15	49905232	49905207	s023900002_R	Chr15	49904964	49904990	GAGTTTCTGATGTTAGAGACTTGTCC	CCAGAATTAAAGTTCTAGAAGGATTTG
Chr15	122.2	T001549335m	T001549335m_F	Chr15	50126284	50126306	T001549335m_R	Chr15	50126607	50126585	GTGTAATGTCAATTTGAGCGGAT	AACCTCCTCATAGTGGTGCAATA
Chr15	122.5	C15-BARC-029659-06286	C15-BARC-029659-06286_F	Chr15	50327382	50327401	C15-BARC-029659-06286_R	Chr15	50327472	50327453	GTATCAGTTCAGATGGTTTC	CACTCGGAGAGGAAATTGGC
Chr15	124.6	T001549770l	T001549770l_F	Chr15	50566300	50566325	T001549770l_R	Chr15	50566640	50566616	TTCATGTTCTCCTTCTTATATGTTCC	AAAGATTGTTGCTAAAGATTCTACC
Chr15	128	T001549997s	T001549997s_F	Chr15	50793175	50793197	T001549997s_R	Chr15	50793366	50793344	CATTGCACTCTCATTCCTTGTTT	CTAGAGGAGGCGATAGAGAGAGG
Chr15	134.1	Satt231	Satt231_F	Chr15	51293482	51293462	Satt231_R	Chr15	51293246	51293267	TGTGCAAAATGTTCATCATCT	GGCACGAATCAACATCAAAACTTC
Chr15	134.1	C15-BARC-040647-07806	C15-BARC-040647-07806_F	Chr15	51350322	51350303	C15-BARC-040647-07806_R	Chr15	51350251	51350270	GCAATTTAATCAAGTTGCAG	GTACATTAACTACGTGACTG
Chr15	135.5	s024400161-2	s024400161-2_F	Chr15	51593512	51593487	s024400161-2_R	Chr15	51593130	51593152	AAGGAAGATGTATAATTGATCAACCC	TCCTCCTTGAACATGTTATTCGT
Chr16	0	C16-BARC-016027-02038	C16-BARC-016027-02038_F	Chr16	133154	133135	C16-BARC-016027-02038_R	Chr16	133068	133087	TCTGGTGTCATTCACTCCTG	GGGTCAGGGTTATAAAGCAA
Chr16	0.5	T001600185s	T001600185s_F	Chr16	184380	184402	T001600185s_R	Chr16	184589	184568	CTCTCTTCACAAGTCACCAGACC	TGGTTTGGTGAGAGAATCCAAT
Chr16	1.1	GMES1300	GMES1300_F	Chr16	417988	417969	GMES1300_R	Chr16	417777	417802	TGGGATTTCTCAGTTTTCGG	GACATGACTAAAGGTCAAAATAGTGG
Chr16	1.1	AW310961	AW310961_F	Chr16	417826	417850	AW310961_R	Chr16	417999	417979	CAACTTTTTAGTAAATATTGCATAA	CATACATCTTTTGGGATTTCT
Chr16	6.1	Satt249	Satt249_F	Chr16	1149218	1149202	Satt249_R	Chr16	1149006	1149027	GCAAATTGTTATTGTGAGAC	GGCCAGTGTTGAGGGATTTAGA
Chr16	8.3	GMES2461	GMES2461_F	Chr16	1222870	1222851	GMES2461_R	Chr16	1222639	1222658	GGCTCAACTGGGTTTCCTTT	TGTTCCAAAACCCAACCAAT
Chr16	10.8	T001601773m	T001601773m_F				T001601773m_R	Chr16	1790020	1789998	TACCGTACACGTGTGAAGAGAAA	GGGACGAGCTTTACTTAAGCATT
Chr16	15.8	C16-BARC-025277-06467	C16-BARC-025277-06467_F	Chr16	2336784	2336765	C16-BARC-025277-06467_R	Chr16	2336702	2336721	CCCAACAATAGACAACCCAC	CGAATTATCTCATTCCGGTG
Chr16	16.1	GMES0236	GMES0236_F	Chr16	2391198	2391179	GMES0236_R	Chr16	2390802	2390821	CCTCCTCCCTCTGAAACCTC	TTTCTTCTCTCCCTTGGGCT
Chr16	18.9	Satt285	Satt285_F	Chr16	2827791	2827814	Satt285_R	Chr16	2827985	2827960	ACATATTGCATTAAAAACATACTT	GACTAATTCTATTTTACACCAACAAC
Chr16	21.2	T001603161m	T001603161m_F	Chr16	3184970	3184992	T001603161m_R	Chr16	3185308	3185286	TTGAATTAGGATATCTTCGGCCT	TAAAGTCTTCACGTTTGGTGTCG
Chr16	26.5	T001603446m	T001603446m_F	Chr16	3470879	3470901	T001603446m_R	Chr16	3471093	3471071	AAACTACGTGGGAGTCAAACTCA	TCAGTAATCGACTCACAAGGACA
Chr16	27	C16-BARC-018661-03226	C16-BARC-018661-03226_F	Chr16	3585124	3585106	C16-BARC-018661-03226_R	Chr16	3585038	3585057	TGGAGAATTTGGATAGAGC	TTATCTCCCACTGCTGCATC
Chr16	28.4	T001603705l	T001603705l_F	Chr16	3729321	3729344	T001603705l_R	Chr16	3729662	3729637	AGAAATCTTCGTAAGACTCTCAAA	GAACATTATATAAGGATTGCCATCAA
Chr16	33.8	GMES0775	GMES0775_F	Chr16	4032164	4032145	GMES0775_R	Chr16	4031959	4031978	TCCCCTTCAACCACTCTCAC	GTGGTGGTTATGGGAAGGTG
Chr16	34.7	C16-BARC-016775-02320	C16-BARC-016775-02320_F	Chr16	4273239	4273221	C16-BARC-016775-02320_R	Chr16	4273148	4273167	CTAAAATGAGTTAGTGTTG	CGGAATGTCCTGCAAACAAC
Chr16	35.7	C16-BARC-013953-01276	C16-BARC-013953-01276_F	Chr16	4427935	4427955	C16-BARC-013953-01276_R	Chr16	4428026	4428007	CTCGAGCTATTTTATGTACAC	TTAAGTGCCAGGGTTGCTTC
Chr16	37.4	GMES6291	GMES6291_F	Chr16	4527244	4527225	GMES6291_R	Chr16	4527058	4527077	CAAAGCCAAGCTCAATTTCC	CAAGGGTTGTTGTTGTGGTG
Chr16	41.3	s016200713	s016200713_F	Chr16	5037245	5037267	s016200713_R	Chr16	5037543	5037521	TTCTCAATCTGCTTAATGGTTCC	TGGCCATAGAGGATGAGATTCTA
Chr16	44.7	s016201264	s016201264_F	Chr16	5579513	5579535	s016201264_R	Chr16	5579749	5579726	GCATCATTTGTTAAGTTCCATGA	CGATGTTAACAGAAGGAGGTAGAA
Chr16	45.4	s016201509	s016201509_F	Chr16	5824566	5824584	s016201509_R	Chr16	5824874	5824852	AGATTCAAACAGTATCAACCCGA	GTTGCGGTCTTAGACTCTCATGT
Chr16	46.6	s027500283-2	s027500283-2_F	Chr16	5988178	5988155	s027500283-2_R	Chr16	5988033	5988056	TTCATACACAACTCACATCTTTGG	CCGCAAATGACATCAAGAATATAA
Chr16	48.2	GMES2423	GMES2423_F	Chr16	6234535	6234554	GMES2423_R	Chr16	6234629	6234610	GCATTCTCACAGGCACTGAA	GTCTAAATGGGGCACATGCT
Chr16	48.2	s027500035	s027500035_F	Chr16	6235152	6235132	s027500035_R	Chr16	6235015	6235037	AAAGTGCTCAAAGATCCAACT	TCAAGTTGAATTTGCGTTGATTA
Chr16	48.2	Satt693	Satt693_F	Chr16	6325753	6325775	Satt693_R	Chr16	6326024	6326001	AGGCCACTCATGTCACTGTCATT	CCAAGAATAAGTTATTTGAAATAAT
Chr16	50.9	s027700214	s027700214_F	Chr16	6761744	6761761	s027700214_R	Chr16	6761911	6761889	AAATTTGTTTCCGCAACT	AATTCTGCTTTGGTTTGTTGAAA
Chr16	54.7	T001607665s	T001607665s_F	Chr16	7822807	7822829	T001607665s_R	Chr16	7823003	7822981	TTCAACCACAACATAAATCGAAA	CACATAGAGACGTAGGAAGAGGG
Chr16	57.8	Satt414	Satt414_F	Chr16	8909806	8909829	Satt414_R	Chr16	8910109	8910086	TATTCCTAGTCACATGCTATTTCA	TCATAATAATGCCTAGAACATAAA
Chr16	57.8	GMES0644	GMES0644_F	Chr16	9958304	9958285	GMES0644_R	Chr16	9958179	9958198	CGATTCTTGGCATTCCACTT	CCGGACATGTTCCACAAAAT
Chr16	57.8	Sct_065	Sct_065_F	Chr16	10668514	10668499	Sct_065_R	Chr16	10668355	10668376	CCCTGTGTTTCCCTCT	GAAAAGTTTTATGTTCTGAGTG
Chr16	57.8	C16-BARC-045065-08871	C16-BARC-045065-08871_F	Chr16	13961905	13961886	C16-BARC-045065-08871_R	Chr16	13961808	13961826	CTATGATGAGGTTTAGAAGC	GAAGCTACTTGACATCAAT
Chr16	57.8	Satt596	Satt596_F	Chr16	14155351	14155334	Satt596_R	Chr16	14155096	14155112	TCCCTTCGTCCACCAAAT	CCGTCGATTCCGTACAA
Chr16	57.8	C16-BARC-044047-08593	C16-BARC-044047-08593_F	Chr16	15844260	15844279	C16-BARC-044047-08593_R	Chr16	15844338	15844319	GATATACAGTGCTGTTTCCC	CTGACTTCTTCTCCCTAACC
Chr16	57.8	C16-BARC-017157-02225	C16-BARC-017157-02225_F	Chr16	16723864	16723845	C16-BARC-017157-02225_R	Chr16	16723792	16723811	CCACCTTAGTGTTTCTTTCC	CAAAATCATGTATCCCCCCC
Chr16	58.1	GMES0058	GMES0058_F	Chr16	20761946	20761927	GMES0058_R	Chr16	20761744	20761770	ATCAAACACAGGGCAACCTC	TCAAATAAGATAAAAGATGTGAACAAA
Chr16	58.1	C16-BARC-016205-02309	C16-BARC-016205-02309_F	Chr16	21014983	21014964	C16-BARC-016205-02309_R	Chr16	21014898	21014917	CCTCCAGAAGGCTTTCTTAC	TGAAGGCGATTTGGATTAGG
Chr16	58.9	Satt456	Satt456_F	Chr16	21571135	21571156	Satt456_R	Chr16	21571424	21571399	GGGCCTTCGTTTGAGTTCATAG	GGGATCATTGGTTAATTGTTGTAAGA
Chr16	59.4	C16-BARC-032295-08940	C16-BARC-032295-08940_F	Chr16	25015992	25016011	C16-BARC-032295-08940_R	Chr16	25016070	25016051	AGACATGACAATGGGCGATG	ATATAAAAACATATTTAAAG
Chr16	60.2	C16-BARC-010251-00569	C16-BARC-010251-00569_F	Chr16	26626521	26626540	C16-BARC-010251-00569_R	Chr16	26626614	26626596	AAAGGATGAAGTAGCGTAGC	ATATCCCTTAAGTGTAATC
Chr16	62.8	alphaP-AT17.6
Chr16	63.4	GMES0824	GMES0824_F	Chr16	28146255	28146274	GMES0824_R	Chr16	28146417	28146398	GAATCATCAAACCCCACACC	CGCCATTCTGAAACATAGCA
Chr16	63.5	C16-BARC-043101-08533	C16-BARC-043101-08533_F	Chr16	28463709	28463728	C16-BARC-043101-08533_R	Chr16	28463798	28463779	CTGGATGCTACATATTTTGC	AGGATGCATGAAATCAGGTC
Chr16	66.5	T001629204m	T001629204m_F	Chr16	29570015	29570037	T001629204m_R	Chr16	29570215	29570193	TGAAGATCATGGGAACTCTTGAC	AGTCACTCACAAGATCCCTCCTT
Chr16	68.7	GMES5722	GMES5722_F	Chr16	30203439	30203458	GMES5722_R	Chr16	30203640	30203621	GTGTTGTGAATGCGTTGAGG	GCTGCTGACAAAGGAGGAAC
Chr16	68.7	s014800003	s014800003_F	Chr16	30283312	30283287	s014800003_R	Chr16	30283073	30283095	AAGACCACAAATATTATTGCTTCAAA	CTCGACATAAACATCAGCATCAA
Chr16	68.7	C16-BARC-018761-03243	C16-BARC-018761-03243_F	Chr16	26685590	26685576	C16-BARC-018761-03243_R	Chr16	30369894	30369875	ATGAGTTGAATAGGCCATCC	GGAGAGAAGCATGAGTGTAG
Chr16	68.7	GMES2804	GMES2804_F	Chr16	30370320	30370301	GMES2804_R	Chr16	30370133	30370152	TTGGGCCAAACAGTCTTTTC	TCATGAAATTTGGTGGAGCA
Chr16	69.2	Sat_366	Sat_366_F	Chr16	30404612	30404634	Sat_366_R	Chr16	30404814	30404787	GCACAAGAACAGAGGAAACTATT	GACATGGTACATCTATATTACGAGTATT
Chr16	69.2	s014300091-2	s014300091-2_F	Chr16	30416492	30416514	s014300091-2_R	Chr16	30416850	30416829	TCATTCAACAATCATAATCACCG	GCCGGAGAGGTTAGTTTGTCTT
Chr16	71.7	s014300472-2	s014300472-2_F	Chr16	30797741	30797765	s014300472-2_R	Chr16	30797887	30797865	TTGGTATCAACTTCAACTCAACTTC	AGACTGAGTCCAAGCCTTCAATA
Chr16	75.5	T001630709l	T001630709l_F	Chr16	31076321	31076343	T001630709l_R	Chr16	31076631	31076608	ATAAGATAGCTTTCCAATCAACA	TTCACACTGATTTATTTATGATGG
Chr16	76.9	GMES4751	GMES4751_F	Chr16	31233434	31233414	GMES4751_R	Chr16	31233242	31233261	TGTGATTTCAAAGGAGTTGCC	AGGGTGCAAAGTTTCCATGT
Chr16	77.2	GMES4395	GMES4395_F	Chr16	31265789	31265808	GMES4395_R	Chr16	31266033	31266014	CTTCTCTCCCACCTCTCGTG	ATCCACTTGACTGGTGGAGG
Chr16	80.7	GMES1619	GMES1619_F	Chr16	31732074	31732053	GMES1619_R	Chr16	31731794	31731813	GAAAACACATTCAGAAACCACG	AAAAGCTGAACGTAGGGGGT
Chr16	82.4	C16-BARC-012111-00333	C16-BARC-012111-00333_F	Chr16	31890946	31890966	C16-BARC-012111-00333_R	Chr16	31891045	31891026	CATGGATATGTTATGTGTTGC	CCTCTTTAACAATGTTGCCA
Chr16	84	GMES1798	GMES1798_F	Chr16	32379824	32379805	GMES1798_R	Chr16	32379534	32379553	GGGGTGATCCAGAGTTGAGA	GCACCATGAAGTCACCAATG
Chr16	84.5	s027900013	s027900013_F	Chr16	32408405	32408431	s027900013_R	Chr16	32408768	32408746	TTTCACTCTGTCTATCATTGTCTTACA	AGCAATGCCACTTTGTTGTCTAT
Chr16	86.4	C16-BARC-039625-07527	C16-BARC-039625-07527_F	Chr16	32589736	32589716	C16-BARC-039625-07527_R	Chr16	32589645	32589665	CAGTATAGTTACACACAGTGG	GTGATGCTTTAATAATTGTGG
Chr16	89.1	s026800043	s026800043_F	Chr16	32718773	32718795	s026800043_R	Chr16	32719059	32719037	ATAGAAGATTGGTTGGAATCCGT	TGTTATAAATGCGAAGTTATGCG
Chr16	91.7	s024700008	s024700008_F	Chr16	33039147	33039169	s024700008_R	Chr16	33039412	33039390	TTGTTGCACTATCAATCATCCAG	ATGCAAGTCATGTTTGATATCCC
Chr16	93.8	Satt244	Satt244_F	Chr16	33483624	33483600	Satt244_R	Chr16	33818814	33818790	CCCCATATGTTTAAATTATATGGAG	ATGGGGATATTTTCTTTATTATCAG
Chr16	94.6	GMES3739	GMES3739_F	Chr16	33929714	33929695	GMES3739_R	Chr16	33929420	33929438	AAGTGGAGCCAGCAAAAGAA	GTGTTGCTGGAAAAGCCAA
Chr16	94.7	GMES1616	GMES1616_F	Chr16	33971917	33971898	GMES1616_R	Chr16	31574532	31574516	CACCAACCTCACCTGAACCT	ACATGACAGCAGCAACAAGG
Chr16	95.4	Satt547	Satt547_F	Chr16	34035076	34035093	Satt547_R	Chr16	34035278	34035258	CTATCCGATCCATATGTG	TGATTTCGCTAGGTAAAATCA
Chr16	98.6	GMES2494	GMES2494_F	Chr16	35634296	35634315	GMES2494_R	Chr16	35634591	35634572	ACGCAAACACTGAACCACAC	CCTTGAGTTCTTCCTCGGTG
Chr16	99.8	GMES0830	GMES0830_F	Chr16	35761685	35761704	GMES0830_R	Chr16	35761820	35761801	GAGAGAGGGAGGAGGAGGAA	CAATCCAACGGCTCAGATTT
Chr16	101.1	LFsoy6	LFsoy6_F	Chr16	35778780	35778799	LFsoy6_R	Chr16	35779139	35779119	GCTTTTGGTTAGTCTCTCTCC	CTTCCTCTCTGCTTGAACAAG
Chr16	104.2	C16-BARC-044031-08587	C16-BARC-044031-08587_F	Chr16	36090685	36090704	C16-BARC-044031-08587_R	Chr16	36090774	36090755	CCAGGGTTTGTGAAATTGGG	TCCATCAGGACGGAATATTG
Chr16	104.7	Satt431	Satt431_F	Chr16	36221613	36221595	Satt431_R	Chr16	36221395	36221415	TGGCACCCTTGATAAATAA	CACGAAAGTTTTTCTGTAACA
Chr16	106.3	T001636111l	T001636111l_F	Chr16	36613162	36613184	T001636111l_R	Chr16	36613528	36613506	CCGATAGATTAAGCCATGAAATG	TTTCTTTGGCATGATATTTGGTA
Chr16	109.9	T001636573m	T001636573m_F	Chr16	37075516	37075538	T001636573m_R	Chr16	37075754	37075732	TAGGTCCTGTTATGTACGGCACT	GAATATTCCAGACCTCAAGTTGC
Chr16	112.1	Sat_395	Sat_395_F	Chr16	37577292	37577270	Sat_395_R	Chr16	37577074	37577100	TCTTAGTCGTGCTGACACTACTC	AGTTTGTTTAGCTCAATCTTTCACTCA
Chr16	113.2	GMES6308	GMES6308_F	Chr16	37795590	37795571	GMES6308_R	Chr16	37795380	37795399	CATGGCTCAATTCCGTTTCT	GTTCTTCTCGTTGTCGCCTC
Chr17	0	T001700092s	T001700092s_F	Chr17	87592	87614	T001700092s_R	Chr17	87789	87771	CCTTTCAAATCAATGTAAGGCTG	TTTCAATTAAGTCCGCATT
Chr17	1.6	T001700369m	T001700369m_F	Chr17	364571	364593	T001700369m_R	Chr17	364785	364763	CAACCTGACACTTGATCGTTAAT	TATTGCTACGGTGCCATCAGTAT
Chr17	1.9	Sctt008	Sctt008_F	Chr17	665014	665034	Sctt008_R	Chr17	665103	665087	ACGCAGAGATAGAGAAAGAGA	CCCCCAGACACAACATA
Chr17	4.4	s002501021-2	s002501021-2_F	Chr17	1014998	1015020	s002501021-2_R	Chr17	1015145	1015122	CACCTGAATGCATCATGGTTACT	TTCTCTTCTCTTACACCTTTCTGC
Chr17	9.4	s002501359-2	s002501359-2_F	Chr17	1351548	1351572	s002501359-2_R	Chr17	1351718	1351694	TCTCATTAACACCTAATCATTCATTCA	TCAGATTTCACAGTTATCACCAATC
Chr17	12.8	Sat_333	Sat_333_F	Chr17	1746730	1746703	Sat_333_R	Chr17	1746582	1746607	TCACAGCTAGGTATTCACGAAAGAGAAA	GCCACCTTATTACACACCTCAAAACA
Chr17	14.2	GMES0866	GMES0866_F	Chr17	1896833	1896852	GMES0866_R	Chr17	1897048	1897029	CTCCACCGTGCACCTTATTT	ACTGGACAGTAGCAGGGTGC
Chr17	16.5	GMES1769	GMES1769_F	Chr17	2564340	2564359	GMES1769_R	Chr17	2564601	2564582	CCATTCACCTTTCTCCTCCA	CTCTGGTCCTCTTGCCGTAG
Chr17	16.5	GMES0854	GMES0854_F	Chr17	2627529	2627548	GMES0854_R	Chr17	2627789	2627770	AAGCAACGTTTGGAGGAAGA	ATCACATCAGAAGCCGAACC
Chr17	16.5	C17-BARC-018767-03009	C17-BARC-018767-03009_F	Chr17	2638024	2638005	C17-BARC-018767-03009_R	Chr17	2637952	2637971	CCTTCTAGAGGGAACCAAAC	GCAGGTATTGACTTACAGAC
Chr17	18.6	GMES3215	GMES3215_F	Chr17	3123615	3123634	GMES3215_R	Chr17	3123780	3123761	TCATTCGCCTTTCTGATTCC	GCCTAATTAAGAACCGGGGA
Chr17	20	GMES1639	GMES1639_F	Chr17	3577683	3577707	GMES1639_R	Chr17	3577866	3577847	CCAACAACTCCTATTAAGTTTTCAG	TTTCTCTTTCGGACCCCTTT
Chr17	20.5	GMES3352	GMES3352_F	Chr17	3730736	3730755	GMES3352_R	Chr17	3731000	3730981	TTGTCACTGCTCATTTTCGC	ACCTCCTGTTGGTGGATCTG
Chr17	21.8	GMES0732	GMES0732_F	Chr17	4063804	4063823	GMES0732_R	Chr17	4063978	4063959	AAATCGTACGGTGACGGAAG	CCTTCTTGAACTTGGCTTCG
Chr17	25.6	GMES2822	GMES2822_F	Chr17	4855754	4855773	GMES2822_R	Chr17	4856030	4856011	TCCCCTCTGGATCTCATGTC	GGATGGTGACCTTCTTGGTG
Chr17	25.8	C17-BARC-014447-01372	C17-BARC-014447-01372_F	Chr17	4872073	4872054	C17-BARC-014447-01372_R	Chr17	4871977	4871996	CAGCTAAAGAACTATTGCAG	GCGGTTAGACAATTGGGGAT
Chr17	26.9	GMES0860	GMES0860_F	Chr17	5042218	5042237	GMES0860_R	Chr17	5042489	5042470	TCAAAAGGAGTTGCATTCCC	TGCACCCAACTCAGTCTGTC
Chr17	28	C17-BARC-044761-08805	C17-BARC-044761-08805_F	Chr17	5400150	5400169	C17-BARC-044761-08805_R	Chr17	5400229	5400210	ACCATGAATGAATCACTGTC	CTTTCAAGTCTGTGTATTAC
Chr17	29.4	Satt135	Satt135_F	Chr17	5892060	5892036	Satt135_R	Chr17	5891893	5891913	CACGGATTTTAAATCATTATTACAT	TTCCAATACCTCCCAACTAAC
Chr17	34.1	s002506120-2	s002506120-2_F	Chr17	6107339	6107363	s002506120-2_R	Chr17	6107538	6107516	GAAATTGAACTTAACAAGGAGGTTT	CATTCGTCCAAATTAAGGTCCTA
Chr17	36.2	s002506580-2	s002506580-2_F	Chr17	6568376	6568394	s002506580-2_R	Chr17	6568517	6568494	GAACGCTTAGCCTCCATCC	GGATAGATCGATAGAAGCAGATTG
Chr17	39.2	Satt486	Satt486_F	Chr17	6831598	6831621	Satt486_R	Chr17	6831839	6831812	CATGCATTACCATAGGCTATAATA	GGGGTCATGCATAATAGAGATAGAACCA
Chr17	41.7	C17-BARC-021191-03999	C17-BARC-021191-03999_F	Chr17	7118473	7118457	C17-BARC-021191-03999_R	Chr17	7118397	7118416	CTGGTCATTCGCTACTTCAC	GTTTGTGTTTGTTGCTCAAG
Chr17	42.2	s002507263-2	s002507263-2_F	Chr17	7245265	7245287	s002507263-2_R	Chr17	7245448	7245424	TAAATAATCAAGCATGCTCACGA	CGGAAATAATGTAATGACAATGAAA
Chr17	44.7	s002507558-2	s002507558-2_F	Chr17	7542020	7542039	s002507558-2_R	Chr17	7542156	7542129	ACGCACTAATTAAACGGCTT	GCTAGAAAGAAACATAATAAAGAGTAAA
Chr17	48	T001708138l	T001708138l_F	Chr17	7868021	7868045	T001708138l_R	Chr17	7868367	7868341	TGGTTTAATTATCAGTTGGTTCCTC	TTTCTACTCTTATCGAAATTAAACTGA
Chr17	51.1	GMES6395	GMES6395_F	Chr17	8237730	8237749	GMES6395_R	Chr17	8237990	8237971	CTCTCACTCCCCCACTCATC	ACTCTTGCTCCTCCGTGAAA
Chr17	52.5	GMES0580	GMES0580_F	Chr17	8363773	8363792	GMES0580_R	Chr17	8364022	8364003	CCAATTCATTGAAGGCCACT	AAGGGAAACAAGGGATTCCA
Chr17	53.5	C17-BARC-035383-07190	C17-BARC-035383-07190_F	Chr17	8569070	8569089	C17-BARC-035383-07190_R	Chr17	8569160	8569141	TTAAGTAAGTAGAAATGTAG	CGTGCATTAGATTTCAGTTC
Chr17	54.9	GMES4177	GMES4177_F	Chr17	8683093	8683112	GMES4177_R	Chr17	8683227	8683209	GCTTCAGCGAAATCCTGTTC	AAGAATTTTCCAGCAAGCGA
Chr17	56.1	Satt002	Satt002_F	Chr17	8817882	8817861	Satt002_R	Chr17	8817757	8817774	TGTGGGTAAAATAGATAAAAAT	TCATTTTGAATCGTTGAA
Chr17	58.9	T001709449l	T001709449l_F	Chr17	9177914	9177936	T001709449l_R	Chr17	9178260	9178238	ATGGAGTAACATATGCAGCAACC	GCTGAACAAGGAATCTCCATAAA
Chr17	62.6	Satt154	Satt154_F	Chr17	9576946	9576922	Satt154_R	Chr17	9576675	9576699	AGATACTAACAAGAGGCATAAAACT	AAAGAAACGGAACTAATACTACATT
Chr17	66.5	s017100534-2	s017100534-2_F	Chr17	9892807	9892829	s017100534-2_R	Chr17	9893167	9893144	AAGTGAGTTACAACCGTCGGATA	GGAGGTCATGTTTAAATGATCAAG
Chr17	70.1	GMES0256	GMES0256_F	Chr17	10223249	10223230	GMES0256_R	Chr17	10222967	10222986	GTGACTCTTCCGTTGCTTCC	TCAGTCTCCGTTCCTCGTCT
Chr17	74.1	T001710954m	T001710954m_F	Chr17	10667360	10667382	T001710954m_R	Chr17	10285360	10285374	TTACTAACATTGTGTTTGGCCGT	CCTAGAGGCCACATCTCCTTATT
Chr17	76.3	C17-BARC-025885-05138	C17-BARC-025885-05138_F	Chr17	10880499	10880480	C17-BARC-025885-05138_R	Chr17	10880402	10880419	GTTGACCGAACTGGATCGAA	CGGAACAGAACTGTTTTTTG
Chr17	77.4	GMES4191	GMES4191_F	Chr17	11114999	11114980	GMES4191_R	Chr17	11114744	11114763	GTGTCCGAGGATGAGGTTGT	CCAAGTAAACTGCAGCACGA
Chr17	78.5	Satt397	Satt397_F	Chr17	11445439	11445458	Satt397_R	Chr17	11445609	11445589	TCTCGGGATCCTTGTTAGAT	AAGAAGAAGAGAACATGTGAA
Chr17	78.7	C17-BARC-013637-01187	C17-BARC-013637-01187_F	Chr17	11636533	11636552	C17-BARC-013637-01187_R	Chr17	11636619	11636600	AGTGAAGCAAGGTGCAACTC	AAAATGTGACAGCTGCATGG
Chr17	78.7	s028100044	s028100044_F	Chr17	11777500	11777522	s028100044_R	Chr17	11777815	11777793	GTCTTCATATTACGGGAAATCCA	TTTCTCTTCTTCTCGTGCTTCTC
Chr17	81.4	Satt208	Satt208_F	Chr17	12425090	12425103	Satt208_R	Chr17	12425275	12425258	ATCGTATTGGGTCT	CCCGTTATTTTCGTATGA
Chr17	84.2	T001713396s	T001713396s_F	Chr17	13132958	13132979	T001713396s_R	Chr17	13133158	13133137	AGTAGTGCGCGCGTGTATATGT	ACAATTTGTATGGCGCTTCATT
Chr17	84.4	C17-BARC-025247-06464	C17-BARC-025247-06464_F	Chr17	13181403	13181384	C17-BARC-025247-06464_R	Chr17	13181308	13181327	TTCTCCCTTTCACATATGCC	GGGAAGAGATAGTGAAGGAG
Chr17	88.6	Satt389	Satt389_F	Chr17	13771928	13771909	Satt389_R	Chr17	13771706	13771725	GCTGGTGTATGGTGAAATCA	CCAAAACCAAAAGTTATATC
Chr17	93	GMES3721	GMES3721_F	Chr17	15630510	15630529	GMES3721_R	Chr17	15630785	15630766	AAGCCCACCATCAATTCAAC	GTTTCTCGGTTTTGGGGATT
Chr17	95.5	C17-BARC-030169-06817	C17-BARC-030169-06817_F	Chr17	20208121	20208102	C17-BARC-030169-06817_R	Chr17	20208051	20208070	AGACTTTTAGGCATGGGAGC	TTCCACACAAGGTTAGAAGC
Chr17	95.5	Sat_300	Sat_300_F	Chr17	20378904	20378926	Sat_300_R	Chr17	20378985	20378958	CGCATTCGCATGTGTGGTAACTA	ACAATCCCATGCAACTACATGATTAAGA
Chr17	95.5	Sat_338	Sat_338_F	Chr17	20586832	20586808	Sat_338_R	Chr17	20586625	20586648	GGGCATTAATAAACCTCCTCTAACT	CCATTTTGGTCATTCCTAACAACT
Chr17	96	C17-BARC-028773-06009	C17-BARC-028773-06009_F	Chr17	23797146	23797127	C17-BARC-028773-06009_R	Chr17	23797047	23797066	AGAAAAAGCCACAGAAGCAG	CCCTGATCAAGCCTATTGTG
Chr17	96	Satt662	Satt662_F	Chr17	23947783	23947806	Satt662_R	Chr17	23947937	23947915	TTGAAGGAAAGGGTAAACCTATAT	TCTTATCGTTCCGTGCTCCAGAT
Chr17	97.6	C17-BARC-029781-06338	C17-BARC-029781-06338_F	Chr17	34621126	34621106	C17-BARC-029781-06338_R	Chr17	34621040	34621059	GTCTGTTCATTTTGTGACCTC	ATGACCCTGTGCTTGGATAC
Chr17	98.7	Sat_001	Sat_001_F	Chr17	36454399	36454417	Sat_001_R	Chr17	36454649	36454631	GATACGACCAAAAATTGTT	AACTGCGAAGATACTACCC
Chr17	98.7	GMES0251	GMES0251_F	Chr17	36523504	36523490	GMES0251_R	Chr17	36523384	36523403	ACCAGTTGGAATTCAGGCAC	TGATCAATGATTGGCCTTGA
Chr17	101.2	s014100269-2	s014100269-2_F	Chr17	37148041	37148064	s014100269-2_R	Chr17	37148201	37148179	ATTAACCTATGTGTTTAATGGTTT	ACACTAATTCACCTTCTGCTGGA
Chr17	103.9	s014100777-2	s014100777-2_F	Chr17	37655856	37655878	s014100777-2_R	Chr17	37656162	37656140	GTTTGGATCCTCTTACGGTCAAT	CCCTACTTAAACCCATCACAAAT
Chr17	109.5	T001738317m	T001738317m_F	Chr17	38023751	38023777	T001738317m_R	Chr17	38024004	38023981	TGATTAGTTGTCTCTTACTGATGTGTG	AAGTCTACCTTTAAATGAGGTGGG
Chr17	110.9	GMES0909	GMES0909_F	Chr17	38311765	38311784	GMES0909_R	Chr17	38311972	38311953	AGACATTGCTTGCCCAAGTT	GATCCCACTGGAGCACTGTT
Chr17	111.7	T001738683s	T001738683s_F	Chr17	38389152	38389174	T001738683s_R	Chr17	38389338	38389316	TTTAACCAGAAAGGATGAGTGGA	TGTCATTATGCCACTTAACCAAA
Chr17	113.6	C17-BARC-017613-02631	C17-BARC-017613-02631_F	Chr17	38549705	38549724	C17-BARC-017613-02631_R	Chr17	38549782	38549763	GTTCAACAGGCTGCTAAAAC	CAGACAATTCAGAAAGATCC
Chr17	113.8	T001738877l	T001738877l_F	Chr17	38582234	38582254	T001738877l_R	Chr17	38582619	38582590	AAACCTACCCATCTTGCACAT	TCAATCCTACTATAAAGAACCTTACAAAGA
Chr17	115.1	s030800156	s030800156_F	scaffold_44	156174	156196	s030800156_R	scaffold_44	156472	156449	CCTGCAATAGCGATAACTCATTT	CCCTTCTCAAGAATATTTAATCCC
Chr17	115.2	s052400012	s052400012_F	scaffold_44	166173	166150	s052400012_R	scaffold_44	165945	165968	GGTCACTACATGGCTGATGGTCAC	TCAAGTACTCACACTGCACAAGCG
Chr17	115.2	s052400010	s052400010_F	scaffold_44	168482	168459	s052400010_R	scaffold_44	168204	168229	TAACCGGACACGATCATTCTTCAA	CAACAGACTGCCATATTCATGTAGCC
Chr17	121.3	s030600085	s030600085_F	Chr17	38823065	38823043	s030600085_R	Chr17	38822869	38822891	ATAGGCTGCAGATAATTCATCCC	CACTTAGTCGCCTCAAGTTAGGA
Chr17	124.1	s018700067-2	s018700067-2_F	Chr17	38985188	38985210	s018700067-2_R	Chr17	38985539	38985514	TAGGTTTGGAACCAAGATACCCT	TATCCTAGAGCATCTACAATAGATAA
Chr17	129.1	s018700334-2	s018700334-2_F	Chr17	39253401	39253418	s018700334-2_R	Chr17	39253597	39253575	TGCACACATATGCACAAA	ATTCCTGCTTAGATCTTAGGTTT
Chr17	129.8	C17-BARC-035371-07167	C17-BARC-035371-07167_F	Chr17	39357016	39357036	C17-BARC-035371-07167_R	Chr17	39357076	39357057	CCATATTTCCAAGTTCCAACC	TGCCTTTCTTCTCATTCGCC
Chr17	131.6	T001739751s	T001739751s_F	Chr17	39474241	39474265	T001739751s_R	Chr17	39474450	39474428	TTCCTGCCTATATATCTGCTCTAAA	TAAAGCAAATTCAATTCGTTGCT
Chr17	133.5	Satt031	Satt031_F	Chr17	39658444	39658463	Satt031_R	Chr17	39658565	39658544	TTCCACTTTGTATCACTTTC	TGACTGTAAAAGAACAGATAAA
Chr17	136	T001740270s	T001740270s_F	Chr17	40000926	40000946	T001740270s_R				AATAACCTTGACGCAAACACG	CAACTTCTAATAACATATCGGAAACA
Chr17	141.1	GMES0687	GMES0687_F	Chr17	40222893	40222874	GMES0687_R	Chr17	40222765	40222785	CTTCTCCCTTGGGTTCTTCC	CATCCTAACCGGTCAAAAACA
Chr17	142.9	Satt386	Satt386_F	Chr17	40469314	40469291	Satt386_R	Chr17	40469154	40469181	GATGATTTTTATAGAATAGATAAT	CTTCGTTGATACCTCAGTAGAGTACAAA
Chr17	147.3	T001740967m	T001740967m_F	Chr17	40698433	40698455	T001740967m_R	Chr17	40698766	40698744	AACTGAGTTTATCAGGGTAAGGG	TTAGCAGTTTACGCGCTCATTAT
Chr17	150.3	T001741151m	T001741151m_F	Chr17	40882534	40882557	T001741151m_R	Chr17	40882800	40882780	AAATGTTGCTCTATATTCATTCAA	AACCAACAGCGTAGCTTCAAA
Chr17	152	Sat_220	Sat_220_F	Chr17	41065942	41065966	Sat_220_R	Chr17	41066216	41066192	CACGCCTCACTATATTATTTTTGAA	ATGGAAATTAAACGCTATCATGCTA
Chr17	153.3	C17-BARC-039151-07458	C17-BARC-039151-07458_F	Chr17	41222164	41222183	C17-BARC-039151-07458_R	Chr17	41222263	41222244	ATCTGCTGAAGAAGAGACCC	CTTTTAACTAAGTTCTACTC
Chr17	155.8	GMES5401	GMES5401_F	Chr17	41494647	41494666	GMES5401_R	Chr17	41494944	41494925	ATGTCCATGCCTACTCCCAG	CACCACCAAGGGTAAGAGGA
Chr18	0	T001800107s	T001800107s_F	Chr18	106473	106495	T001800107s_R	Chr18	106682	106662	CAGGACAGGAGTTGAGATTTACG	GGATGGGATGATGGATACAAA
Chr18	1.3	T001800318s	T001800318s_F	Chr18	316979	317001	T001800318s_R	Chr18	317188	317168	ATACTCTCTCTCCTGACTGAAAT	CTCTCTGGCCAGTACAGTGAC
Chr18	3.8	T001800702s	T001800702s_F	Chr18	702093	702115	T001800702s_R	Chr18	702295	702273	GTTACCGAATTTCTCCGGTTATT	GCATACAGATACAAGGGAACAGG
Chr18	5.1	C18-BARC-028719-05996	C18-BARC-028719-05996_F	Chr18	977333	977352	C18-BARC-028719-05996_R	Chr18	977413	977394	AGGAAGAAGCAAGTGCAGAG	TTTCAGTGGACAGCAAAGGG
Chr18	6.1	GMES2435	GMES2435_F	Chr18	1117451	1117432	GMES2435_R	Chr18	1117173	1117192	GCACGGCACTAGTCGTTTTT	GCAAGTATCTGCGACTTCCC
Chr18	7	Satt038	Satt038_F	Chr18	1344022	1344042	Satt038_R	Chr18	1344188	1344169	GGGAATCTTTTTTTCTTTCTATTAAGTT	GGGCATTGAAATGGTTTTAGTCA
Chr18	10	Satt309-2	Satt309-2_F	Chr18	1736292	1736313	Satt309-2_R	Chr18	1736775	1736753	CCACACAGAACACCAATTGACT	GGCTAGATTCAAGAAACAAAAGG
Chr18	15.4	T001802291l	T001802291l_F	Chr18	2299204	2299226	T001802291l_R	Chr18	2299566	2299544	CTTTGAAGGATGGTATATGTGCT	GAAAGAGGTGCTCGCATTTAATA
Chr18	17.8	GMES1633.1	GMES1633_F	Chr18	2831682	2831701	GMES1633_R	Chr18	2831865	2831846	ATGAGAGGTTGCCACTGGAG	GGCATGTTCTGACCATTGTG
Chr18	17.8	GMES0791	GMES0791_F	Chr18	2831707	2831726	GMES0791_R	Chr18	2831865	2831846	TCAAGGTGAGGAGGAAATGC	GGCATGTTCTGACCATTGTG
Chr18	21.1	GMES4967	GMES4967_F	Chr18	3191977	3191996	GMES4967_R	Chr18	3192078	3192059	GAAGAAAGTCCTGGTGGTCG	GATGTCTTGGAACGAAGGGA
Chr18	21.6	GMES4241	GMES4241_F	Chr18	3281047	3281028	GMES4241_R	Chr18	3280800	3280819	ACAACCCCATTTTCCTTTCC	CACGAACCTTGTACCCCAAC
Chr18	23.9	T001803568m	T001803568m_F	Chr18	3590063	3590083	T001803568m_R	Chr18	3590329	3590307	TTTGCATTTAGGCAAGCATTA	TGATGATCGATCCAAGGTCTATT
Chr18	27.4	GMES4035	GMES4035_F	Chr18	3881191	3881211	GMES4035_R	Chr18	3881337	3881318	TCAATTTTCTCCCCCTCTCTC	TGCTGTGTAGTTTGCTTGGC
Chr18	27.9	T001803970s	T001803970s_F	Chr18	3991258	3991280	T001803970s_R	Chr18	3991430	3991408	CAACAGATTGAGGAGGATGATGT	TGCTTTGATTTGTTAGCATGTTC
Chr18	27.9	T001803988m	T001803988m_F	Chr18	4009203	4009225	T001803988m_R				AGAAATACAATCACAGTGAGCCC	GGCAAATTGAGACCAATTCTCTA
Chr18	28.7	T001804222s	T001804222s_F	Chr18	4240381	4240403	T001804222s_R	Chr18	4240591	4240569	TTTAGTCCTATGCCAGTTGATCC	TGTGTTTCATCTTTACAGAATTG
Chr18	29.6	T001804263m	T001804263m_F	Chr18	4280811	4280833	T001804263m_R	Chr18	4281069	4281047	TTTGCATGTCCAAAGCATATTAC	GTTCATCGGGCTCTCTTTAAATC
Chr18	30.8	T001804377m	T001804377m_F	Chr18	4395625	4395647	T001804377m_R				CCCATCAACACCTTGAGAATTAG	CACATGCAAGATTAAAGCATAGAA
Chr18	34	Satt130-2_re	Satt130-2_re_F				Satt130-2_re_R				CATTAGGGACAAAGATTGCTGA	CGTCTATATTGGATCTCCATGATCTC
Chr18	34.3	T001804644l	T001804644l_F	Chr18	4663732	4663754	T001804644l_R	Chr18	4664074	4664052	GAGTCATGGGTATTTCTTTCACG	TAGCACTCACTAGATGCAACCAA
Chr18	37.2	T001804817m	T001804817m_F	Chr18	4832921	4832945	T001804817m_R	Chr18	4833232	4833210	TGTGTTTCACTTCTCTTTAGCATGT	TCTTCATTTATCCTCGCAACATT
Chr18	38.1	T001804875l	T001804875l_F	Chr18	4891547	4891569	T001804875l_R	Chr18	4891898	4891876	CTTTGCCCGATCATATAATGCTT	ACAATATTTATGGGCACACTTGG
Chr18	40.2	GMES0033	GMES0033_F	Chr18	5309465	5309484	GMES0033_R	Chr18	5309757	5309738	TGCGTTTCTTCTGTCCCTCT	TGGTCGAAGAGGTCTCGTTT
Chr18	41	C18-BARC-013237-00459	C18-BARC-013237-00459_F	Chr18	5543441	5543460	C18-BARC-013237-00459_R	Chr18	5543536	5543517	TCCCTCAGGTAATTTTAGTC	CCAAATTAAGGGGCACAGAG
Chr18	41	GMES0794	GMES0794_F	Chr18	5575896	5575877	GMES0794_R	Chr18	5575658	5575677	GCCACCAATCTCATCCAGAC	ATCTTCTTGGGTCGGGTCTT
Chr18	44.6	Satt324	Satt324_F	Chr18	5926765	5926787	Satt324_R	Chr18	5927000	5926982	GTTCCCAGGTCCCACCATCTATG	TTTCTTTTATACCTTCAAG
Chr18	50	T001806170s	T001806170s_F	Chr18	6206988	6207010	T001806170s_R	Chr18	6207177	6207156	TTTGTAGTCCCATAAATAAGCCA	TTTCGTTGGTCCTTAACGTAGC
Chr18	51.8	T001806567l	T001806567l_F	Chr18	6591093	6591115	T001806567l_R	Chr18	6591436	6591411	AATTTGTTGACTTGTGTGGGAAT	GCGTAAACTATATTGTTCTTTGAACG
Chr18	55.1	s000401152-2	s000401152-2_F	Chr18	7055069	7055091	s000401152-2_R	Chr18	7055466	7055439	CGAGTAACTATCGAGTTCATGGG	TTCTGTTTACTTCTATATCCATTATTCA
Chr18	55.1	C18-BARC-042925-08463	C18-BARC-042925-08463_F	Chr18	7057261	7057280	C18-BARC-042925-08463_R	Chr18	7057337	7057318	ATGTCTGCAAGGTAAGTGAC	GTGTTATGTGTTTTTTGTCC
Chr18	56.6	s000401695-2	s000401695-2_F	Chr18	7598066	7598088	s000401695-2_R	Chr18	7598260	7598239	TCATGGTGTAGCAGTAGGATGAA	AATGTTGGTCGATATGGTTGTTC
Chr18	57.6	s000402585-2	s000402585-2_F	Chr18	8487716	8487740	s000402585-2_R	Chr18	8487915	8487894	TCTTATGAATTATGGAAACCCTTGA	AACGTGGCACCTAACCTTTAGA
Chr18	59.5	s000403406-2	s000403406-2_F	Chr18	9335021	9335041	s000403406-2_R	Chr18	9335167	9335146	TCTGGAGACTCTATGACCCAAGA	AGAAATATTCTTTGGCGGTGGT
Chr18	60	Satt394	Satt394_F	Chr18	9765839	9765863	Satt394_R	Chr18	9766137	9766113	TTTTTTCAATTTAAAGAGAATTGAC	TAACTTGCATGTGTATATCGAGATG
Chr18	60.3	GMES0241	GMES0241_F	Chr18	9816304	9816285	GMES0241_R	Chr18	9816086	9816105	CTTCAGAGCATTCCTGAGGC	ATAACCCTCAAACCCCAACC
Chr18	61.6	T001811100m	T001811100m_F	Chr18	11124285	11124307	T001811100m_R	Chr18	11124495	11124472	CCGTTAAGTGATGATGTGGAGTA	ATGATGAGTTGTTGGTCTCTATCC
Chr18	62.7	T001812033l	T001812033l_F	Chr18	12057382	12057404	T001812033l_R	Chr18	12057743	12057720	GTCCGCTGATCTAGAATCTTTCA	TGTTTATTTCCCAATCATTCTCAA
Chr18	63.2	GMES4022	GMES4022_F	Chr18	12480635	12480616	GMES4022_R	Chr18	12480538	12480557	CCAGTGATCAAAGGGGAAGA	ACATGAAAGGCGTAAGGGTG
Chr18	64.3	C18-BARC-017647-02644	C18-BARC-017647-02644_F	Chr18	14984114	14984095	C18-BARC-017647-02644_R	Chr18	14984015	14984033	CCAGTCAGACCACAAAGTAG	TTGACTTGGAATTACCTTC
Chr18	65.6	C18-BARC-020159-04489	C18-BARC-020159-04489_F	Chr18	17683382	17683401	C18-BARC-020159-04489_R	Chr18	17683462	17683443	TAATCCTATCCGCGGCATTC	ATTCGGTTTCTTCGGGTTGC
Chr18	65.6	GMES3568	GMES3568_F	Chr18	17691193	17691212	GMES3568_R	Chr18	17691465	17691446	AGTGGAGGGTGGTCATCAAC	AACCTGCAATTTCATTTGGC
Chr18	68.5	Satt352	Satt352_F	Chr18	21086521	21086498	Satt352_R	Chr18	21086335	21086360	AATGTATTTTTGTTTCTCCATCAA	TGATAAGCCAAAAAATGGAAGCATAG
Chr18	69.4	C18-BARC-013825-01251	C18-BARC-013825-01251_F	Chr18	28657678	28657697	C18-BARC-013825-01251_R	Chr18	28657760	28657741	TTTACCCAGTGTCCCAAAGG	GGATGGAAAACTGGAGAACC
Chr18	69.4	s003700176	s003700176_F	Chr18	25272188	25272211	s003700176_R	Chr18	25272407	25272385	GGGTTGAATAATGTGATAACCAAA	GTCATCCCTTTCATGCCTAGTAA
Chr18	69.4	s003902576	s003902576_F	Chr18	34741366	34741388	s003902576_R	Chr18	34741586	34741564	ATTCCTAGCTAGCCACATGCAAT	TGCATTGTCAAGTAAGACTCACC
Chr18	69.7	s003903175-2	s003903175-2_F	Chr18	35317047	35317069	s003903175-2_R	Chr18	35317396	35317374	TGACATATTCAGAGGGAAACACG	GGATGTTTGGACGGTACAGATTA
Chr18	70.7	s033800001	s033800001_F	scaffold_1831	2540	2518	s033800001_R	scaffold_128	2380	2402	TATATGTCCCAATGTTGCTAGGG	CGAAGCGTGATGAAACATTTAGT
Chr18	71.3	s003905552-2	s003905552-2_F	Chr18	38694626	38694604	s003905552-2_R	Chr18	38694467	38694489	GAAGCAACGTATCACTCTTGAAA	CTCTCCTATTCCTAAACGTACCC
Chr18	71.3	GMES4003	GMES4003_F	Chr18	38954916	38954897	GMES4003_R	Chr18	38954647	38954673	GCTTGAGACTGGACGTAGGC	TTTTTCCACTAATAAACTTTAACCTCA
Chr18	71.6	s015100043	s015100043_F	Chr18	41112867	41112845	s015100043_R	Chr18	41112499	41112523	ACAAGCCTTTAATCAAGACAGCA	CAAATTGTGATCTTTCTTTCATGTG
Chr18	72.4	s026400360-2	s026400360-2_F	Chr18	41526328	41526348	s026400360-2_R	Chr18	41526463	41526441	AAAGTTCCCAATTTAGACAAA	TTAGAATTTACAAAGCTTGAGCA
Chr18	72.4	s008900001	s008900001_F	Chr18	41707846	41707868	s008900001_R	Chr18	41708145	41708123	TTAAGTTGGACGTGTTCATACCC	CCTCTCACCCTCATCCTCTATTT
Chr18	74	C18-BARC-038795-07335	C18-BARC-038795-07335_F	Chr18	45931993	45932012	C18-BARC-038795-07335_R	Chr18	45932084	45932064	TAAGCAGAAAGGGGATCCTA	CAAACCAACCACTTGTTCATC
Chr18	75.3	C18-BARC-029289-06142	C18-BARC-029289-06142_F	Chr18	47495974	47495955	C18-BARC-029289-06142_R	Chr18	47495900	47495915	CTGTATTGGTGCCCAATGTG	TACCGGCCACAATGATCAG
Chr18	75.3	Sat_223	Sat_223_F	Chr18	47632035	47632056	Sat_223_R	Chr18	47632218	47632196	CGGTTTTAAGCTATAACACATC	CAAGCACACTACTATTTATCATT
Chr18	75.7	Sat_203	Sat_203_F				Sat_203_R	Chr18	47927267	47927240	TGTGGCAAGTTATAGTTGAGTAGTTGAA	GGCTATAATGTCCTTAATACTTATTTAT
Chr18	78	Satt505	Satt505_F	Chr18	48198854	48198871	Satt505_R	Chr18	48199084	48199064	CGCATCGGTGGTTGTTAA	TGACCCAAAAGTAATTTGGAG
Chr18	78	C18-BARC-031339-07055	C18-BARC-031339-07055_F	Chr18	48469742	48469723	C18-BARC-031339-07055_R	Chr18	48469664	48469683	GTAATGCATTTTTTGTGTTC	ACGGCTCCTTCCTACACATT
Chr18	78.1	s002100366	s002100366_F	Chr18	48508128	48508150	s002100366_R	Chr18	48508508	48508486	TTTACATTGGTTGCCTACGTCTC	TTACAACCTGTTTCCAAGGACTC
Chr18	78.8	s002100692	s002100692_F	Chr18	48840578	48840601	s002100692_R	Chr18	48840777	48840755	GCAGCAATATGGGAGTCTAGTAGT	AGATTGCTAACATCCTTCAATTA
Chr18	79.6	s002100995	s002100995_F	Chr18	49143521	49143543	s002100995_R	Chr18	49143920	49143898	CTGCTTACTTTCCAAGTGTCCTG	TGATGTGAACGGATTCTATTCCT
Chr18	79.6	C18-BARC-013627-01180	C18-BARC-013627-01180_F	Chr18	49306578	49306597	C18-BARC-013627-01180_R	Chr18	49306665	49306646	GTTTTCTTTAGCTCCCACTG	ATGGCCAATGTTTGCAGAGC
Chr18	79.9	s002101345	s002101345_F	Chr18	49493130	49493152	s002101345_R	Chr18	49493324	49493301	TCTCCTACTTCTCTTTCTCCCGT	TTCAAAGAAGAATTGCAACTTGAC
Chr18	82.9	T001854045l	T001854045l_F	Chr18	49766396	49766420	T001854045l_R	Chr18	49766774	49766753	GAACGTGTATAGTGATCAAGAAAGC	ATAAGTTGGGTTTGCGTTGAGT
Chr18	84.9	T001854127m	T001854127m_F	Chr18	49848587	49848607	T001854127m_R	Chr18	49848855	49848832	TTCAACGGTTCGGTGAATAAA	GGGTTTAATAGGCATTAGGTGTAA
Chr18	88.9	T001854293s	T001854293s_F	Chr18	50014183	50014205	T001854293s_R	Chr18	50014345	50014323	AGCAGAGTTATAGTGGAGATGCG	CGATGAACTATTTCAACCACGTT
Chr18	90.3	s002102138	s002102138_F	Chr18	50282130	50282152	s002102138_R	Chr18	50282329	50282304	AAAGTGTTAGGAAGTAAGATCCA	TCAAGTTATTGAATCCTATATCATCT
Chr18	95	T001854972m	T001854972m_F	Chr18	50693518	50693541	T001854972m_R	Chr18	50693750	50693728	CGTGATAATAATTTCATCGGATTT	TCAGTATCGCATAATCCAGACAA
Chr18	97.2	GMES4067	GMES4067_F	Chr18	50937390	50937370	GMES4067_R	Chr18	50937126	50937145	TTATCACGACACCAATTCTCC	AGTGATGTAGGACGGAACGG
Chr18	97.2	Satt288	Satt288_F	Chr18	51123892	51123870	Satt288_R	Chr18	51123677	51123699	GGGTGATTTAGTGTTTGACACCT	CTTATAATTAAGAGCAAAAGAAG
Chr18	99.4	s002103628	s002103628_F	Chr18	51775769	51775792	s002103628_R	Chr18	51776124	51776100	GACAGTCTCTACTCCTGCTCATCA	AAGAGTTTGACTGTGATGATTGATT
Chr18	100.8	C18-BARC-027488-06597	C18-BARC-027488-06597_F	Chr18	51838785	51838766	C18-BARC-027488-06597_R	Chr18	51838700	51838720	TTGAACAGTTCGCTATCCCC	CTGATTACTCACCGATAATAC
Chr18	102.9	s002104271	s002104271_F	Chr18	52423195	52423222	s002104271_R	Chr18	52423393	52423369	TGTTACATAATTGGGAGTAATTAACTTT	AAGGCTTCACGTGTTATATAGTTGC
Chr18	102.9	C18-BARC-042393-08251	C18-BARC-042393-08251_F	Chr18	52439978	52439997	C18-BARC-042393-08251_R	Chr18	52440062	52440043	TCTGCTGATGATGATCCTTC	CTAGTGCAGCTGTTCTTTGG
Chr18	104.4	s002104592	s002104592_F	Chr18	52746894	52746914	s002104592_R	Chr18	52747038	52747016	GTGTCCCGCATGCACTAATTT	GCAGCCATCACATACATACACAC
Chr18	106.9	s002104937	s002104937_F	Chr18	53093277	53093299	s002104937_R	Chr18	53093407	53093385	CACACAACTTCCTCAAATTATCG	TGTTGTTTCTCGTGTCTCCTAAA
Chr18	107.5	GMES0651	GMES0651_F	Chr18	53155533	53155514	GMES0651_R	Chr18	53155393	53155412	CCTCTATGCCAGTGGTTGGT	CTTTGTCCCTTGAGACAGGC
Chr18	108.3	T001857606l	T001857606l_F	Chr18	53331786	53331809	T001857606l_R	Chr18	53332143	53332120	TGAGCTTACATGCACAGTTAGACA	TCTTACACCTATCTCCATCACTCG
Chr18	112.6	GMES2625	GMES2625_F	Chr18	53505790	53505771	GMES2625_R	Chr18	53505618	53505637	CTCGTGGGTCCACTTCAAAT	TGTTGAGGCTTCTCGTGTTG
Chr18	114.7	T001857894m	T001857894m_F	Chr18	53620108	53620130	T001857894m_R	Chr18	53620438	53620416	TTTAAACATACACGTGAGAAGAA	TTTGGCAGAGCAGTATCATTAGT
Chr18	118.2	GMES5412	GMES5412_F	Chr18	53857805	53857790	GMES5412_R	Chr18	53857603	53857622	TCCTCTGATGATGATGGGGT	TCCACGATTTCCCTCAAGTC
Chr18	121.2	Satt191	Satt191_F	Chr18	54447567	54447552	Satt191_R	Chr18	42169523	42169506	CGCGATCATGTCTCTG	GGGAGTTGGTGTTTTCTTGTG
Chr18	122.3	GMES1017	GMES1017_F	Chr18	54515094	54515112	GMES1017_R	Chr18	54515247	54515228	GCAGCATCTCCTCAAACACA	GTGCCAAGATCATAGCAGCA
Chr18	124.1	GMES1232	GMES1232_F	Chr18	54891204	54891223	GMES1232_R	Chr18	54891491	54891472	AACGAACGGTGATCCTTCTG	CAGCAGCACAACCAACACTT
Chr18	127.6	C18-BARC-024251-04812	C18-BARC-024251-04812_F	Chr18	55196662	55196643	C18-BARC-024251-04812_R	Chr18	55177429	55177448	CAAGTGCAAAGTCTCATGCG	GCAGTGAGAGCATATGCTTC
Chr18	127.8	T001859611m	T001859611m_F	Chr18	55334692	55334714	T001859611m_R	Chr18	55334997	55334975	ACTTTAAGAGGCCTTTCATGGAC	AAGGTGCCAGGTCGTTTATTATT
Chr18	128.2	T001859843s	T001859843s_F	scaffold_3003	128511	128495	T001859843s_R				TATTTCTCAGCAGCTTCCTTCAG	TTTGATATTGAAAGTTGGTCAGGA
Chr18	130.1	s002107611	s002107611_F	Chr18	55759400	55759422	s002107611_R	Chr18	55759865	55759843	GTCCTATAAGACAATTCAACAAA	TTGTTGTGTATGTTTGTGTGTGC
Chr18	131.1	s002107925	s002107925_F	Chr18	56064028	56064048	s002107925_R	Chr18	56064188	56064166	TAGCTTCAGTACCACGTTCCTTC	GTTTACCTTCGGCCTTAGACTTT
Chr18	131.6	C18-BARC-031121-06998	C18-BARC-031121-06998_F	Chr18	56185068	56185049	C18-BARC-031121-06998_R	Chr18	56184984	56185003	ACTCCACCACTACAAAACCC	TGCTTTGGCCTTTGTAGTAG
Chr18	132.2	Sat_064	Sat_064_F	Chr18	56329880	56329856	Sat_064_R	Chr18	56329738	56329758	TAGCTTTATAATGAGTGTGATAGAT	GTATGCAAGGGATTAATTAAG
Chr18	135.4	GMES1110	GMES1110_F	Chr18	56755562	56755543	GMES1110_R	Chr18	56755429	56755448	GAAACAAAGCAGCACCCATT	ATCGGTGACTGACCACACAA
Chr18	137.1	T001861387s	T001861387s_F	Chr18	57084624	57084639	T001861387s_R	Chr18	57084852	57084831	GAGCGGAACCGCGTAA	GCAATGTAGGGATTCCGATAAA
Chr18	139.2	T001861839l	T001861839l_F	Chr18	57536221	57536243	T001861839l_R	Chr18	57536582	57536560	AAGACTGACTCCCTTTGGATACC	TAATGTGCTATAACCAGGCTTCC
Chr18	139.8	T001862276l	T001862276l_F	Chr18	57981721	57981743	T001862276l_R	Chr18	57983296	57983272	ATTGTCTATGGAACTGGTGCATT	CCTTAGTTTAAACGTCAAAGAATCG
Chr19	0	C19-BARC-043223-08561	C19-BARC-043223-08561_F	Chr19	20076	20095	C19-BARC-043223-08561_R	Chr19	20160	20141	ACCATCGACGATAGCCTGAG	CCCTTCTTCACTTCTACCTC
Chr19	0	GMES0701	GMES0701_F	Chr19	95949	95968	GMES0701_R	Chr19	96180	96164	CGAAACGACATCTTTCAGCA	CGTAACCTCTTCGAAGCCTG
Chr19	1.4	T001900352m	T001900352m_F				T001900352m_R	Chr19	249898	249919	GGTAGCTAACAATTTAACCGATTTG	CACGTATCTTCAATCTACCGAGG
Chr19	2.4	T001900267m	T001900267m_F	Chr19	335443	335421	T001900267m_R	Chr19	335111	335132	GACAAACAACAACAGAATCCACA	AGCCTACAAACGGACAGAGAAC
Chr19	3.5	T001900179l	T001900179l_F	Chr19	451967	451943	T001900179l_R	Chr19	451603	451625	TTGTACTATTATTCATGCTCAGCCA	ATCACAAATTTCCAAGGACTGAA
Chr19	5.4	T001900085l	T001900085l_F	Chr19	545825	545803	T001900085l_R	Chr19	545450	545475	CAAATATGAGGGTTCGTTTCCTT	GAAGAAATTGACTGAAATGTCTCTTT
Chr19	6.8	T001900602m	T001900602m_F	Chr19	641601	641623	T001900602m_R				ACAAGTGCACACACACTGATAGC	GCTTCATAATTGAATCAACGTCA
Chr19	8.4	Satt495	Satt495_F	Chr19	690087	690110	Satt495_R	Chr19	690318	690295	TGCCGCGAGATTAATATAATTTGT	GTGCGGCAAGAAGTTGAAATAAAG
Chr19	10	GMES0704	GMES0704_F	Chr19	880270	880251	GMES0704_R	Chr19	879981	880000	AAATTCACCTCCCCACAACA	GAGGAATCAGCTTGGGAACA
Chr19	13	T001901004l	T001901004l_F	Chr19	1039836	1039858	T001901004l_R	Chr19	1040196	1040174	ACAAGGTCTGAGACAAGCAGTTC	GACTTTATGGATTGCGAGTGAAA
Chr19	15.2	GMES0748	GMES0748_F	Chr19	1228633	1228652	GMES0748_R	Chr19	1228820	1228801	AGCGTGTGGGAAATCAAGAG	AAGCTGCAAAAGGCAAAGAA
Chr19	16.4	s019601002-2.1
Chr19	17.6	s019601002-2	s019601002-2_F	Chr19	1522813	1522791	s019601002-2_R	Chr19	1522446	1522467	GCAGGTAACAGAGAATGGAGAGA	AAATTCCCGTAAATTATGCAGC
Chr19	19.3	T001901766l	T001901766l_F	Chr19	1809365	1809387	T001901766l_R	Chr19	1809744	1809721	TGAAATGTTATGTTCAACGATGG	AAATGTAATCCAACATCAACTCAA
Chr19	20.3	T001901796s	T001901796s_F	Chr19	1839721	1839743	T001901796s_R	Chr19	1839900	1839878	CCTTGATCGAATTGTCTCAGTTT	CCTTGACCCAATTTCATACTCAC
Chr19	22.5	Satt182	Satt182_F	Chr19	2059531	2059550	Satt182_R	Chr19	2059724	2059706	GGTCCACATGAAATGAAGGT	TCTCAGCCTGCAAAGAAAA
Chr19	24.6	T001902216s	T001902216s_F	Chr19	2261139	2261161	T001902216s_R	Chr19	2261318	2261296	TTGACTATGAGAAATGGGTTCGT	ATGTGAATGAGTGTGATCAATGC
Chr19	30.9	s000200001-2	s000200001-2_F	Chr19	2534674	2534696	s000200001-2_R	Chr19	2534855	2534833	GATCAAATTTAGCCTTTGTCTCG	CCATTAACCAAAGTGGAGTTCAG
Chr19	34.2	s000200296-2	s000200296-2_F	Chr19	2827467	2827487	s000200296-2_R	Chr19	2827612	2827588	AAAGTATCGCCCTTGGGATTA	TGATTGTAAGCACAACTTCTAGTTT
Chr19	37.7	GMES3204	GMES3204_F	Chr19	3454232	3454251	GMES3204_R	Chr19	3454390	3454371	CACTTCTTCCTCCGATCCAA	CCCAGCTCTTAGTCACTGGC
Chr19	38.4	GMES1705	GMES1705_F	Chr19	3630910	3630887	GMES1705_R	Chr19	3630637	3630656	GGACAAAAGTCACAAAACAAAACA	AACAACCCACGATGGAGAAG
Chr19	39.4	Satt388	Satt388_F	Chr19	4244193	4244217	Satt388_R	Chr19	4244476	4244452	TAACTGGTATTTTTAGAACAAAAGT	TCTGGGACTGGATTTATTGTTTGAA
Chr19	40.8	T001905375m	T001905375m_F	Chr19	5361277	5361299	T001905375m_R	Chr19	5361603	5361579	CATGATGCATGTGGAAACTAGAA	TCAAATTCATTCATATACGTCTGTT
Chr19	41.7	C19-BARC-038881-07382	C19-BARC-038881-07382_F	Chr19	7376306	7376286	C19-BARC-038881-07382_R				GTTTGTCAATAGGGAACACTC	GGGAAAACAAGTCTCCAAGG
Chr19	42.7	T001910235s	T001910235s_F	Chr19	10170805	10170825	T001910235s_R	Chr19	10171014	10170992	AAACTTACAAGCGAGTGCAGC	TAGTAGGCTGAGGATGATCTTGG
Chr19	42.7	T001915546l	T001915546l_F	Chr19	21022129	21022107	T001915546l_R	Chr19	21021757	21021779	TTTCACACTGTTCTTCGAGAATG	AACCAACATTTAGAGGTGGAATG
Chr19	42.7	T001920586s	T001920586s_F	Chr19	17885073	17885093	T001920586s_R	Chr19	17885280	17885253	CAAGATTGGCGATGATGTTCT	CAGATTAAATATGATGAATATAGCAGCAA
Chr19	42.7	T001921490l	T001921490l_F	Chr19	25389577	25389553	T001921490l_R	Chr19	25389206	25389228	TTTCTAATTAATTTAGGGACCACCA	ATCCTCTACAACCTGCAAGTCAA
Chr19	43.7	T001926877m	T001926877m_F	Chr19	27028693	27028717	T001926877m_R	Chr19	27028921	27028899	TTTCTTCTTTAGGCAATCTTTATCC	TTTCAGTCCACTCAAGAGACAAA
Chr19	43.7	T001930963s	T001930963s_F	Chr19	31107139	31107160	T001930963s_R	Chr19	31107342	31107322	AAAGAATGCGTTGAAATGGTTT	AGAGGTGGAAGGATGAAGGAA
Chr19	43.7	C19-BARC-042921-08457	C19-BARC-042921-08457_F	Chr19	31110203	31110222	C19-BARC-042921-08457_R	Chr19	31110293	31110274	GGTTCTCATAAAAAATTTCG	AATTAAATAGTCTATGATGG
Chr19	44	C19-BARC-018117-02529	C19-BARC-018117-02529_F	Chr19	32334107	32334126	C19-BARC-018117-02529_R	Chr19	32334186	32334167	GTCCAACTGACAAGATAGAG	CAACAACTCAGCCTTTACGG
Chr19	44.5	Satt497	Satt497_F	Chr19	33863897	33863917	Satt497_R	Chr19	33864161	33864138	GTTTTGGATTGACTTTGTTGA	GGCTCAATTAGAGCATGCAACATC
Chr19	48.4	T001934251m	T001934251m_F	Chr19	34413211	34413233	T001934251m_R	Chr19	34413482	34413459	CAATGAAGGACTATACCTGTGGC	TGATTATTTATAATAACGGTGTCA
Chr19	49	T001934360m	T001934360m_F	Chr19	34522375	34522391	T001934360m_R				GAAAGATTGGAGAGTGAAACAGC	AAAGTTAAATCGTTCAATTGATGT
Chr19	50.5	Satt313	Satt313_F	Chr19	34751890	34751912	Satt313_R	Chr19	34752130	34752108	GTAAGTCATGGCTTTTTAATCTT	CGAGGTATGGAACCTAACTCACA
Chr19	51.9	Satt613	Satt613_F	Chr19	35279793	35279771	Satt613_R	Chr19	35279645	35279666	GAATATGATCATTGGTAATGTAC	CGGCTTCAAACGGCAAATAATC
Chr19	51.9	C19-BARC-041465-08003	C19-BARC-041465-08003_F	Chr19	35465451	35465470	C19-BARC-041465-08003_R	Chr19	35465530	35465511	CTTAAATCACTAGTCACCGC	TCTAACCGTTGAGACCGTTG
Chr19	53	GMES1048	GMES1048_F	Chr19	35787418	35787437	GMES1048_R	Chr19	35787569	35787548	CTCAACTCTCCCCTGAGTGC	TGATAATGTGAATGTGACACGG
Chr19	54.7	s010901301	s010901301_F	Chr19	36233475	36233452	s010901301_R	Chr19	36233290	36233313	GTGTTGACATTATCGGCAACGAAT	GGCGCGTACCCATTTTAACTCTTT
Chr19	55	T001936293l	T001936293l_F	Chr19	36472316	36472338	T001936293l_R	Chr19	36472674	36472652	TAATTGACTAATTCGATCGGGAA	CCCTTTGCGAGTAAACCTCTAGT
Chr19	57.8	T001936630l	T001936630l_F	Chr19	36807012	36807034	T001936630l_R	Chr19	36807399	36807381	AAAGGACTTACCATCCAACAGTG	CCTAATCGCCATTAACATAGCAG
Chr19	61.4	T001936838m	T001936838m_F	Chr19	37015034	37015056	T001936838m_R	Chr19	37015316	37015294	TGAAGTATCAATGGCATCTGTTG	ACCCACATTGTATTGCTCTTACC
Chr19	61.6	T001936942s	T001936942s_F	Chr19	37119000	37119022	T001936942s_R	Chr19	37119195	37119178	GGGCTTTAGTGCTAGGGTACAGT	AATAAGGGCTTTGAGTTAGGTCG
Chr19	63.8	GMES5355	GMES5355_F	Chr19	37941241	37941260	GMES5355_R	Chr19	37941545	37941526	CCCTTTGGTCCACTCGTAAA	CTCTGCAACGCTGATACCAA
Chr19	65.8	C19-BARC-031623-07122	C19-BARC-031623-07122_F	Chr19	38370943	38370962	C19-BARC-031623-07122_R	Chr19	38371037	38371017	GGACTCTTGAAAACATCTGG	GTCAGATCTATTTTGCTTTGG
Chr19	68.1	GMES3285	GMES3285_F	Chr19	38633690	38633709	GMES3285_R	Chr19	38633976	38633957	AGTTCACGGCCATGTTTAGG	TTCTTCACGTTGGAGTGCAG
Chr19	70.3	T001938721m	T001938721m_F	Chr19	38932296	38932318	T001938721m_R	Chr19	38932598	38932576	CCAAATTACTGAGTTGCTTGTCC	CTTCCTTGTTCCCTGTTAACCTT
Chr19	73.6	T001939240l	T001939240l_F	Chr19	39439716	39439738	T001939240l_R	Chr19	39440094	39440072	CAACCACTCCCGTCTCTTACATA	AACATAAAGGACTCATACCGTTT
Chr19	74.2	s007701934-2	s007701934-2_F	Chr19	39813360	39813338	s007701934-2_R	Chr19	39813183	39813208	TCGTTTATAATACTCACACTTCTGC	AAGTAGATATCACACTTTCATTAAGC
Chr19	76.9	T001940085l	T001940085l_F	Chr19	40275676	40275698	T001940085l_R	Chr19	40276042	40276020	TGAACTTGCTATATACGGAGCGT	TCGATGCAATAGCTTACAGAACA
Chr19	79.4	Sat_340	Sat_340_F	Chr19	40636694	40636713	Sat_340_R	Chr19	40636922	40636901	ATGGAGCCGTGCTTATTCAC	GCTTTCCCCTTTTAACTCTGAG
Chr19	83.6	Sct_010	Sct_010_F	Chr19	41378951	41378936	Sct_010_R	Chr19	41378803	41378818	TCCCAAAAGCATTGAG	TATGCACGGAAGAGGA
Chr19	86	GMES6825	GMES6825_F	Chr19	42028489	42028510	GMES6825_R	Chr19	42028694	42028675	TTTCCTCCACGTTTCACTTTTT	CTTGATGGGTTAAGGTTGGG
Chr19	90.1	T001942220l	T001942220l_F	Chr19	42419411	42419433	T001942220l_R	Chr19	42419786	42419763	GGTATCTTTAGGCTGTAGCCACT	AAAGTATGATGCAAAGGGTATATT
Chr19	93.6	T001942475s	T001942475s_F	Chr19	42674218	42674241	T001942475s_R	Chr19	42674410	42674388	TGAAACTGAATATAAGCCTCCAGA	GTCGCTTTACACGTTACATGGAT
Chr19	95.8	Satt527	Satt527_F	Chr19	43035863	43035839	Satt527_R	Chr19	43035672	43035696	GTTACATCTTGCAAACTAAATTAAC	GAATTTTGCACATAAATTAATAACT
Chr19	96.3	GMES3292	GMES3292_F	Chr19	43298252	43298271	GMES3292_R	Chr19	43298555	43298536	CCGAACGAAAAAGAAAGACG	GCTATGGTGGAGTTGGTGCT
Chr19	99.4	s023300462-2	s023300462-2_F	Chr19	43630490	43630512	s023300462-2_R	Chr19	43630854	43630831	CTTATTAAGGCGTGTTTCAATCG	AAAGAGATGTTAAGAATGATCTGA
Chr19	103.5	T001943785l	T001943785l_F	Chr19	43986572	43986594	T001943785l_R	Chr19	43986934	43986912	AACCCAATCCTAGTGGCTAGAAA	TTATGTTGCACGAAGAGGTGAAT
Chr19	104.8	s004100370-2	s004100370-2_F	Chr19	44115711	44115733	s004100370-2_R	Chr19	44115899	44115874	TGCGAGTGAGTTTGATTCTTCAT	GGTGATAAGTGCATGTAGACTTGTTT
Chr19	105.9	GMES0259	GMES0259_F	Chr19	44408495	44408514	GMES0259_R	Chr19	44416420	44416401	ACCTAACTTGCGTGGGAGTG	TTTGTCTTGTTCCTCCGAGC
Chr19	109.5	GMES1723	GMES1723_F	Chr19	45140719	45140738	GMES1723_R	Chr19	45140805	45140786	CATCATCAACAACCTCACGC	GCCATGTCTGGATCTGTGTG
Chr19	109.5	Sat_286	Sat_286_F	Chr19	45181148	45181175	Sat_286_R	Chr19	45181298	45181280	TTGCTTGCTAAGTAGTGTTTTTAATCCT	TCTCCCATCATGCAACTTCAATA
Chr19	109.5	LFsoy3	LFsoy3_F	Chr19	45183524	45183505	LFsoy3_R	Chr19	45183252	45183271	CAAGGTTGAGATTGAGGGTG	GTCAGTCATGATCTGCACCG
Chr19	110	C19-BARC-013061-00434	C19-BARC-013061-00434_F	Chr19	45438272	45438253	C19-BARC-013061-00434_R	Chr19	595476	595491	TAAAGTGTTGCTTGCATGCG	TCCGGGGTCTCATGGCATAT
Chr19	111.1	GMES3931	GMES3931_F	Chr19	45805480	45805499	GMES3931_R	Chr19	45805715	45805696	TTCCGTTGTAAGGGGAAAAA	GTTGATCCTTGGCTCTCTGC
Chr19	113.8	Satt664	Satt664_F	Chr19	46226294	46226320	Satt664_R	Chr19	46226511	46226485	TAGATGCTCAACATCAACACTAATCTG	GACGATGAAGAAATATACTATTACGAA
Chr19	116.1	C19-BARC-030101-06809	C19-BARC-030101-06809_F	Chr19	46632846	46632828	C19-BARC-030101-06809_R				TGTCTTCTCTATAACACAC	CTCATTCTATACATTGTCTC
Chr19	116.5	Satt229	Satt229_F	Chr19	47166079	47166053	Satt229_R	Chr19	47165904	47165927	TGGCAGCACACCTGCTAAGGGAATAAA	AGGTGGTCTAAAATTATTACCTAT
Chr19	119	FT3-751	FT3-751_F	Chr19	47632584	47632565	FT3-751_R	Chr19	47632395	47632414	GAGACACTGCCATGCCATAA	GGCTGCAATCATCATCACAT
Chr19	119	FT3-190	FT3-190_F	Chr19	47661543	47661522	FT3-190_R	Chr19	47661245	47661266	CATTTCCATTTGTGCCTACCAC	TTTCTTCCTTCTCTCACCCACT
Chr19	122.8	C19-BARC-021827-04217	C19-BARC-021827-04217_F	Chr19	48212538	48212557	C19-BARC-021827-04217_R	Chr19	48212635	48212617	CTTACGTGGGTGCATAAATT	GGTACGCATAATATTATGG
Chr19	123.1	GMES4376	GMES4376_F	Chr19	48224525	48224506	GMES4376_R	Chr19	48228710	48228729	TTGGCACATCTTGCTTGAAC	TGACGGGATCCCAATAAAAA
Chr19	124.4	GMES1550	GMES1550_F	Chr19	48382071	48382090	GMES1550_R	Chr19	48382363	48382344	CCGGTTTTGTTGCCTAAGAA	ACGAATTGGCAACCCACTAC
Chr19	125.5	GMES4173	GMES4173_F	Chr19	48608682	48608701	GMES4173_R	Chr19	48608950	48608931	TCCATAAGGCACAATGCAGA	TGAATGTGCTGCTGGGTATG
Chr19	126.3	s021200706.1	s021200706_F	Chr19	48871958	48871944	s021200706_R	Chr19	48871714	48871736	TCAGTAAGGTAGTCCCACTTTGG	TATTCTGGGAGGAAGCACCTTAT
Chr19	129.3	GMES2731	GMES2731_F	Chr19	49238097	49238116	GMES2731_R	Chr19	49238375	49238356	CTGTGTTTGATTGTCACGGC	TGAGCAATAAGCACTCACGG
Chr19	129.7	Satt373	Satt373_F	Chr19	49312044	49312022	Satt373_R	Chr19	49311824	49311848	TCCGCGAGATAAATTCGTAAAAT	GGCCAGATACCCAAGTTGTACTTGT
Chr19	130.5	GMES0853	GMES0853_F	Chr19	49440990	49441009	GMES0853_R	Chr19	49441242	49441223	TCCCCCTCTCAATCTTTTCC	AGAAGGATCCATCGCTACCC
Chr19	131	GMES2377	GMES2377_F	Chr19	49528338	49528319	GMES2377_R	Chr19	49528189	49528208	CTCTTTCTTCCACCACCACC	ACCGAGTGAGGGTACAGCAT
Chr19	131.8	GMES0975	GMES0975_F	Chr19	49631616	49631635	GMES0975_R	Chr19	49631813	49631794	CGCACCTCTTTTGTGTCTCA	GAGAAGGAGAAGGAGGACGG
Chr19	136.7	Sat_245	Sat_245_F	Chr19	50144143	50144170	Sat_245_R	Chr19	50144311	50144284	AGCCTACTTTTACTAGAACGTCAACAAG	AAAAATTCAACTCCCCTTTAATAGATTC
Chr19	136.7	GMES6625	GMES6625_F	Chr19	50342555	50342574	GMES6625_R	Chr19	50342830	50342811	TTTGATAGCCAATGCAGCAG	CCCTAATCGAACAAGCCAAA
Chr19	137.9	s004106980-2	s004106980-2_F	Chr19	50647123	50647148	s004106980-2_R	Chr19	50647316	50647293	TCTTTGAAGAAGATAAATCAACATGG	TTGAACGGTTTAACAAGCTGTAAC
Chr20	0	T002000016s	T002000016s_F	Chr20	15136	15160	T002000016s_R	Chr20	15345	15326	CAGACATTATCATTGGTGTAACTTT	TTGTTGGGTCTCGACAGAAA
Chr20	0.5	T002000059s	T002000059s_F	Chr20	58306	58328	T002000059s_R	Chr20	58471	58449	GCAATGGTATGTGTAAGAAGCCT	CACCACTACTTTGTTGAGGAAGG
Chr20	1.6	T002000188l	T002000188l_F	Chr20	187552	187573	T002000188l_R	scaffold_21	377481	377460	AAACACCACATGCAATACCTTG	TAGGATGGGTAAGACTATTTGGG
Chr20	4.6	T002000300m	T002000300m_F	Chr20	298951	298973	T002000300m_R	Chr20	299257	299235	GAAGCCATAGTCATGTCCTCTGT	TGATGCTCAAATCTTACCCTAGC
Chr20	6	T002000417l	T002000417l_F	Chr20	412178	412200	T002000417l_R	Chr20	412557	412534	TGCTTGGAGATTTACATAGAGAA	TTAACACAAGGACAACATTGACTC
Chr20	11.6	T002000523l	T002000523l_F	Chr20	518643	518665	T002000523l_R	Chr20	518988	518966	TAGATGACAAGACCAAACTCACG	TCATTGCAATATCTTGCTTGTGT
Chr20	11.9	T002000573s	T002000573s_F	Chr20	567151	567173	T002000573s_R	Chr20	567276	567254	ACTGGGTTTGTTCTCACATGACT	TTGAAACCACGTACACGTAGAAA
Chr20	13.8	GMES3485	GMES3485_F	Chr20	657246	657266	GMES3485_R	Chr20	657457	657438	TTAGGGTTTCTGATTGGAGCA	ATGTTGGAGAGGAGGAGGGT
Chr20	14.6	C20-BARC-028335-05832	C20-BARC-028335-05832_F	Chr20	690228	690209	C20-BARC-028335-05832_R	Chr20	690129	690148	CACCATGTCAGCTATAACTC	AGAGTAGCAGATGGAAGTTG
Chr20	15.1	T002000730s	T002000730s_F	Chr20	724595	724616	T002000730s_R	Chr20	724793	724771	ATATATTGTCACGTGCCGACTG	TCTTTCTGGTATTTGGGATTGTG
Chr20	20.7	T002000983m	T002000983m_F	Chr20	978617	978639	T002000983m_R	Chr20	978951	978929	TGACTAACACTGCTGAAGCTCAT	ATCATTGTTGTACCCAGCTATGG
Chr20	22.3	GMES1618	GMES1618_F	Chr20	1084522	1084503	GMES1618_R	Chr20	1084245	1084264	ATGCTCTTGGGTGGTGGTAG	TCCAGCTTTGCGTGTAACAG
Chr20	25.9	Satt571-2	Satt571-2_F	Chr20	1287772	1287752	Satt571-2_R	Chr20	1287441	1287462	TTTCAACAGCTGAGAGATTGC	AGGAAAGACGACAAACGCAAAT
Chr20	26.8	C20-BARC-040123-07661	C20-BARC-040123-07661_F	Chr20	1386455	1386436	C20-BARC-040123-07661_R	Chr20	1386374	1386393	ATTCTGAGAGAAAATAATAG	CGCTGACAGCCTTAACATTC
Chr20	28	Satt419	Satt419_F	Chr20	1885401	1885423	Satt419_R	Chr20	1885636	1885613	CCATGACGCCAGCTTGCTTTTCC	CCATTATATACAAATTACGATCAT
Chr20	30.5	C20-BARC-042619-08314	C20-BARC-042619-08314_F	Chr20	2072979	2072998	C20-BARC-042619-08314_R	Chr20	2073054	2073036	TTGCAGTCCAGAAGACATCG	CCCAGTATTTAACAAGCAT
Chr20	31.3	T002002126s	T002002126s_F	Chr20	2119071	2119093	T002002126s_R	Chr20	2119257	2119235	GGCATTCCTTCAAATATATCCCT	GGCAATTCTACATGGTAGCCTCT
Chr20	35.1	Sat_368-2_re	Sat_368-2_re_F				Sat_368-2_re_R				GCGAGTGCAAGAAAAAGGGAGAAAATA	GCGCTTTTCTTTCCTTTTTTTTCTCTT
Chr20	35.4	T002002565m	T002002565m_F	Chr20	2557683	2557706	T002002565m_R	Chr20	2558006	2557984	TGATATGTCACTTCTCTTGTGACT	CTTCGTCCTCGTATCAGTCAATC
Chr20	39.7	Satt614	Satt614_F	Chr20	3903530	3903555	Satt614_R	Chr20	3903836	3903811	CTCCCCTTTAACCTTTCCTTTATTAG	CGGTAGGAATTAATTGTAGATAGGAT
Chr20	39.7	GMES6670	GMES6670_F	Chr20	4285101	4285082	GMES6670_R	Chr20	4284838	4284857	CACCGTCTTTCAGCACTTCA	TCCCACCCTATGAACTCGTC
Chr20	39.7	T002004816l	T002004816l_F	Chr20	4798294	4798316	T002004816l_R	Chr20	4798675	4798653	TACACATCATCAAGGCACTCATC	AAATCCAATGGTGAAGAATAAAC
Chr20	40.5	T002005440m	T002005440m_F	Chr20	5406453	5406475	T002005440m_R	Chr20	5406664	5406644	GTTGCAACAATAAGATTTACGGG	TCACATGTCGATCACCAGTCTTA
Chr20	41.8	T002011255l	T002011255l_F	Chr20	7253544	7253566	T002011255l_R	Chr20	7253891	7253869	AATTCAGAGTCAGTTGAAGCACC	GAAGCAAATGCATTGGAACTAAG
Chr20	43.4	Satt127	Satt127_F	Chr20	8169605	8169624	Satt127_R	Chr20	8169828	8169808	CGCTTGTGAACCCTGCTAAA	CCATCCTCTGAAACCGTTATCT
Chr20	44.2	s000119123-2	s000119123-2_F	Chr20	18048873	18048896	s000119123-2_R	Chr20	18049203	18049181	CAAGTCCCTATGGAGATGAACTCT	ACCGTTGGTTATGGGTTACTCTT
Chr20	44.2	T002006435l	T002006435l_F	Chr20	17107815	17107793	T002006435l_R	Chr20	17107471	17107493	AGTTTATTAGGTGACGGGTGTCG	TTTGAGGTAATCCAATAACGGCT
Chr20	44.2	s020400333	s020400333_F	Chr20	16596736	16596758	s020400333_R	scaffold_3002	301099	301077	CGAAGACTTTGAGTCCTACGAAA	TTTACCCGTGTGAATTTGGTTAC
Chr20	44.2	T002009756m	T002009756m_F				T002009756m_R	Chr20	18656915	18656937	TTGTATCTTTCCGCTGATCTCAT	GACATGAAGACTGTAACGACACG
Chr20	44.2	T002008955m	T002008955m_F	Chr20	19456436	19456414	T002008955m_R	Chr20	19456171	19456193	TGCTCATGTTTCATTACATGCTT	CACAAGTTAGGTCAAGGTTGGTC
Chr20	44.5	T002007942m	T002007942m_F	Chr20	20456170	20456148	T002007942m_R	Chr20	20455847	20455869	TGGTTGATAGTTATGTCCCGTTT	CGGTCTATAGCCACCCAAATAGT
Chr20	44.5	C20-BARC-029827-06444	C20-BARC-029827-06444_F	Chr20	24177948	24177967	C20-BARC-029827-06444_R	Chr20	24178041	24178021	TGCTTCCTGGATTCTTCATC	GGTAATTTTCTGCAGAAGCTC
Chr20	44.7	Satt239	Satt239_F	Chr20	25275420	25275438	Satt239_R	Chr20	25275605	25275584	CCAAAAAATGAATCACAAT	AACACAATCAACATCCTTGAAC
Chr20	45	Sat_219	Sat_219_F	Chr20	25674600	25674580	Sat_219_R	Chr20	25674346	25674365	TCATGCCACGTGATATTTTAT	TGTGTCCCAAATGTGATTCA
Chr20	45	Sat_174	Sat_174_F	Chr20	25693539	25693563	Sat_174_R	Chr20	25693761	25693738	TACGAAATATTGCAAGAGATACATT	GCCTTAGATCAATTGTGATAAAAA
Chr20	45	T002026426s	T002026426s_F	Chr20	27586772	27586798	T002026426s_R	Chr20	27587024	27587002	GAGACAAACTTATAACTCCGATTGTTC	TTTAAGCGTAACGCAACTCTTTC
Chr20	46.1	T002027923l	T002027923l_F	Chr20	29085333	29085355	T002027923l_R	Chr20	29085676	29085654	TTATGGTAATGTTTGTCTGGCTT	CACCATTTGTAGGGAAGTGACAT
Chr20	46.6	T002029541l	T002029541l_F	Chr20	30691118	30691140	T002029541l_R	Chr20	30691492	30691470	CAACAACACTGCAAACTTCTGTT	ATTCTCGCCTTATAAGCAGGTTT
Chr20	47.7	T002031490m	T002031490m_F	Chr20	32630726	32630748	T002031490m_R	Chr20	32630974	32630952	TAATTAATCCAACCCGAAGGTTT	AATGAATCTTGTGATCTCATCCG
Chr20	47.7	T002031881l	T002031881l_F	Chr20	33029245	33029267	T002031881l_R	Chr20	19472010	19472025	GGGAGGCAAATCTAATAAGTCCA	TCATATATACGGAGTGTGAATGGAA
Chr20	48.5	T002032140s	T002032140s_F	Chr20	33288062	33288084	T002032140s_R	Chr20	33288249	33288227	TTTGACCATCTCGTTTAACTTCG	CATGAAATGATGGCAATTGAACT
Chr20	49	T002032323s	T002032323s_F	Chr20	33463908	33463930	T002032323s_R	Chr20	33464112	33464090	ATAATGATATGCGCTTCCAAGAA	ATCTACGAGGCTCTAAGTTCAAA
Chr20	52.1	T002032584s	T002032584s_F	Chr20	33725180	33725202	T002032584s_R	Chr20	33725348	33725326	ATTTGCCATATGAACAACCACTG	TAAGTTCCGTAGGCTACTTGGTG
Chr20	55.8	T002032785s	T002032785s_F	Chr20	33926257	33926279	T002032785s_R	Chr20	33926454	33926431	CCACAAATTTGGAAACAGACTTC	AAGTAGATTTCTCCTATACCGTTT
Chr20	57.8	GMES5899	GMES5899_F	Chr20	34243284	34243305	GMES5899_R	Chr20	34243564	34243545	AAAACGTATGCCACTGTTGTTC	TGAAGGCAATAATTGGAGGG
Chr20	62.4	GMES4748	GMES4748_F	Chr20	34574638	34574654	GMES4748_R				GGGTCTAGCGGAAGACCTTT	TGACACACATGTTGCAATGG
Chr20	64.4	T002033603m	T002033603m_F	Chr20	34742227	34742249	T002033603m_R	Chr20	34742541	34742519	AAGGTTGTTACTTGGTATCATTC	GCTCGTTGAATACTCGGCTAATA
Chr20	68.2	T002033899s	T002033899s_F	Chr20	35037585	35037612	T002033899s_R	Chr20	35037794	35037772	TCAATAATAAGAAGAAATAAGAGTGAGA	TTTCTTTGGCTTACAAGAACGAT
Chr20	69	Satt270	Satt270_F	Chr20	35362781	35362765	Satt270_R	Chr20	35362590	35362607	TGTGATGCCCCTTTTCT	CAGTGCATGGTTTTCTCA
Chr20	70.6	C20-BARC-029461-06194	C20-BARC-029461-06194_F	Chr20	35578934	35578953	C20-BARC-029461-06194_R	Chr20	35579017	35578998	GGTCAATGACTGAAAAGCAC	AAGACGTCAGAAGAGATGGC
Chr20	71.2	GMES1628	GMES1628_F	Chr20	35644604	35644585	GMES1628_R	Chr20	35644365	35644385	CTGCTGATGGTGCTTGAAAA	TCAAACTTTCACCAAACGAGC
Chr20	76.2	GMES0205	GMES0205_F	Chr20	36390380	36390399	GMES0205_R	Chr20	36390677	36390658	GAGGATCGGGTAACGAATCA	TAATTCAGCGGAAAGAAGCC
Chr20	77.5	GMES1146	GMES1146_F	Chr20	36740656	36740638	GMES1146_R	Chr20	36740396	36740415	GGCGTTGTGTTGGTGGAAT	TAATGGGTGCTCGAAAAAGG
Chr20	77.5	s005202718-2.1	s005202718-2_F	Chr20	36831067	36831089	s005202718-2_R	Chr20	36831145	36831119	TCCCTTCCTCTTTAATTTGCTTT	GAAGAGAAGACAGAACAGAGTATTTGA
Chr20	77.5	C20-BARC-029803-06416	C20-BARC-029803-06416_F	Chr20	36855900	36855919	C20-BARC-029803-06416_R	Chr20	36855996	36855977	GGAGTATGTTGCTACTATTC	GTGTGCGTCTAAATTTCAAG
Chr20	81.4	s013301378-2	s013301378-2_F	Chr20	37108757	37108735	s013301378-2_R	Chr20	37108559	37108575	TTTCCTTTCTGTTTAGATTTCCT	TAGACCTCCAACGCGCC
Chr20	85	T002036224s	T002036224s_F	Chr20	37318499	37318521	T002036224s_R	Chr20	37318708	37318686	TACAGGATAAATGCTACCGAGGA	CTTGTAGACCGGCCTAACCTATT
Chr20	88.4	s013300975-2	s013300975-2_F	Chr20	37510270	37510245	s013300975-2_R	Chr20	37510126	37510149	AAAGCTATTATGGATCATGGTTAGTT	TTATGAAACTTCAGTGTTGAACGA
Chr20	92	Satt650	Satt650_F	Chr20	38171771	38171788	Satt650_R	Chr20	38172012	38171992	CAGTTGGCTGGTCAAATC	TCTGGGTTACTTTTATTGTCA
Chr20	95.8	alpha3UTRat	alpha3UTRat_F	Chr20	38680442	38680463	alpha3UTRat_R	Chr20	38680641	38680626	CTGTCTGCTTAGCTAATTTGAT	CTGACAGACTCAATAACAAGAT
Chr20	100.6	Sat_170	Sat_170_F	Chr20	39770195	39770171	Sat_170_R	Chr20	39770036	39770060	GATTGATTTAATTAAGTGTGATTAA	CCGATGATCATGAATTAGAATAACA
Chr20	102.5	Satt330	Satt330_F	Chr20	40155042	40155061	Satt330_R	Chr20	40155159	40155138	CCTCCATTCCACAACAAATA	GCATCCGTTTCTAAGATAGTTA
Chr20	104.4	C20-BARC-040751-07840	C20-BARC-040751-07840_F	Chr20	40540243	40540262	C20-BARC-040751-07840_R	Chr20	40540303	40540284	GTATCAAAAGAGAAATACAC	TAAACTCATTTACATATGAC
Chr20	106.1	GMES0743	GMES0743_F	Chr20	40865394	40865375	GMES0743_R	Chr20	40865021	40865040	AAACCCTCCCCTCACACTCT	TCCTTGTCGAACCGGTAAAG
Chr20	106.1	Sat_324	Sat_324_F	Chr20	40998720	40998694	Sat_324_R	Chr20	40998523	40998548	CAATGTCCCTCTTTCTTCCAATGATAA	TGCAGGGGAGATTAGCTAGAAATGTG
Chr20	106.1	C20-BARC-029151-06094	C20-BARC-029151-06094_F	Chr20	41021913	41021895	C20-BARC-029151-06094_R	Chr20	41021834	41021853	TAATATAAGCTGGTATTCC	AGTGCCTATAAATGGCTGGG
Chr20	110.6	Satt623	Satt623_F	Chr20	42164986	42164963	Satt623_R				GTGCAATGATTTTAATGATATGAT	CGTGTAAAAGGTTATAACGTGTAA
Chr20	114.3	T002041468m	T002041468m_F				T002041468m_R	Chr20	42583596	42583576	TTATGATCACTTGATCCCTCTTT	AGGTATTGCACATTTGCATCG
Chr20	115.7	Sat_155	Sat_155_F	Chr20	42932725	42932702	Sat_155_R	Chr20	42932556	42932573	GGGACAGCACCGTCAAGGAGGAGA	TGGGAAAGAAATTGTAGC
Chr20	116.2	Sat_420	Sat_420_F				Sat_420_R	Chr20	42932568	42932584	GATGGAGCCAACA	TGTAGCCCTAGAAAGTT
Chr20	121.4	T002042675s	T002042675s_F	Chr20	43789864	43789886	T002042675s_R	Chr20	43790061	43790039	TAATTGTGGACTTCAAAGAAGGG	TTGATTGGGAATTCGTTTCTACA
Chr20	122.3	s030900011	s030900011_F	Chr20	44167801	44167823	s030900011_R	Chr20	44168129	44168107	TCCTCGGAGAGTAATGTCAGAAA	TTGCAGCTGTAGTTGTGGTTACA
Chr20	127.4	Satt102	Satt102_F	Chr20	44793295	44793312	Satt102_R	Chr20	44793449	44793426	CACCTTGCTTCAAAATTC	AATAAGTGAGAGCATAGAAAATAC
Chr20	128	C20-BARC-008253-00130	C20-BARC-008253-00130_F	Chr20	45013486	45013467	C20-BARC-008253-00130_R	Chr20	45013406	45013425	CATCGCTTGCTTGAAGACAC	GATGTGGCAGACAATGATGG
Chr20	128.7	T002044011s	T002044011s_F	Chr20	45136975	45136997	T002044011s_R	Chr20	45137185	45137157	ATCATGATAGATTAGAGGTGGGA	TCAATAAGTCTGATTCTATTTACGATTTG
Chr20	129	C20-BARC-015569-02005	C20-BARC-015569-02005_F	Chr20	45169154	45169173	C20-BARC-015569-02005_R	Chr20	45169248	45169229	CACATAATGCCTAACACTTG	GGAAAATGAAGTAGCCGAGC
Chr20	132.1	GMES6273	GMES6273_F	Chr20	45597042	45597027	GMES6273_R	Chr20	45596843	45596862	TGATTCGGCTCTGATCTTCC	GTTCCTGCTTGACGGAGAAT
Chr20	134.5	GMES0425	GMES0425_F	Chr20	46194622	46194603	GMES0425_R	Chr20	46194442	46194461	GGGAAAGGAATGCAAACTGA	TTCTTCAGGCCACCAAGAAT
Chr20	135.4	GMES1641	GMES1641_F	Chr20	46578094	46578113	GMES1641_R	Chr20	46578374	46578355	GGGTCAGAGAGGTCCAATGA	GGTGTGGCCTTCCATACATC
Chr20	135.7	Sct_189	Sct_189_F	Chr20	46676804	46676820	Sct_189_R	Chr20	46676964	46676946	CTTTTCCTGGCAATGAT	AAAATCGCAAAACCTTAGT
Chr20	135.7	GMES1596	GMES1596_F	Chr20	46783599	46783580	GMES1596_R	Chr20	46783343	46783362	ACCAGTTTCTCCAAACCACG	AAGCAAGGCTTTGTCGAAGA
Chr20	135.9	C20-BARC-018065-02503	C20-BARC-018065-02503_F	Chr20	46825329	46825309	C20-BARC-018065-02503_R	Chr20	46825255	46825274	GCAGAGCATGACAAACTAAAG	ATACTAGGCATGGATGGCAG
Chr20	135.9	GMES2744	GMES2744_F	Chr20	46871195	46871214	GMES2744_R	Chr20	46871334	46871315	TGCAGGAGCTGAATTTTCCT	CAACCCGAAATGGATTACCA
Chr20	138.4	GMES3036	GMES3036_F	Chr20	47356838	47356857	GMES3036_R	Chr20	47357082	47357061	CAAGACTCCCTTGCCAAAAG	AACTTCTTCGTCCGATCTTACA
Chr20	139.2	GMES2783	GMES2783_F	Chr20	47617909	47617928	GMES2783_R	Chr20	47618295	47618276	GCCACACTGACACACCAAAC	AGAAAGAGCATTCGGGTGAA
Chr20	139.2	BE820889	BE820889_F	Chr20	47836136	47836162	BE820889_R	Chr20	47836521	47836501	ACAACATTCCATAGACACAAATAATAA	TTTGGTCTTGGCCTGTATTTG

## Sheet: TableS3
Supplementary Table S3. Genome sequence reads used for reference mapping and de novo assembly
Sequencer	Read type	Insertion	Coverage	Number of bases	Accession	De novo assembly	Reference mapping
Illumina HiSeq2000	PE	300bp	12.1x	12132771213	DRR021742	o	o
	MP	8Kbp	7.7x	7697646089	DRR021743	o
Roche FLX titanium	SE	-	10.1x	10170746555	DRR021740	o	o
	MP	3Kbp	0.43x	429217443	DRR021741	o
LifeTechnologies ABI 3730xl	BES	110k, 178kbp	0.097x	97235392	LB000001- LB184894	o

## Sheet: TableS4
Supplementary Table S4. Markers with unmatched linkage order and physical position.
Chromosome	Genetic dist. (cM)	Genetic marker	Hit chr/scaffold	Start position (bp)
Chr05	62	T000506451l	Chr05	8161203
Chr05	62.1	T000506933s	Chr05	8645607
Chr05	63.4	T000515966m	Chr05	9951801
Chr05	63.4	T000515027l	Chr05	10893519
Chr05	63.7	T000510174l	Chr05	11852853
Chr05	63.7	T000509488l	Chr05	12550191
Chr05	63.7	T000509183s	Chr05	12845189
Chr05	64.8	s000317639-2	Chr05	14417488
Chr05	64.8	s000318623-2	Chr05	15403493
Chr05	64.5	T000517293s	Chr05	15988144
Chr05	63	T000513898l	Chr05	17235590
Chr05	62.4	T000513220m	Chr05	17903379
Chr05	62.4	T000511990m	Chr05	19153689
Chr05	64.2	T000511342s	Chr05	19796928
Chr05	64	T000510747m	Chr05	20402455
Chr05	64.8	s000314909-2	Chr05	21959100
Chr05	64.8	s000311101-2	Chr05	25741073
Chr06	106	s004400621	Chr06	32962820
Chr08	107.9	Satt708	Chr06	40461455
Chr06	107.8	C06-BARC-029025-06052	Chr06	42014619
Chr06	108.4	s025900023	Chr06	42217040
Chr10	57.8	s032900010	Chr10	7236243
Chr10	59.6	s020900037-2	Chr10	7394813
Chr10	58.5	s018300465r	Chr10	7975136
Chr10	59.2	Sat_221	Chr10	9932592
Chr10	59.3	C10-BARC-042707-08378	Chr10	10258512
Chr10	59.6	s012201678-2	Chr10	10293934
Chr10	59.6	s019800659-2	Chr10	11902178
Chr10	106.5	GMES1511	Chr10	43382603
Chr10	108.2	s030100090	Chr10	43531072
Chr10	107.6	s030100085r	Chr10	43536136
Chr10	110.3	Satt331	Chr10	44029161
Chr11	71.7	s013701958-2	Chr11	11055924
Chr11	71.9	s008000014-2	scaffold_32	12933
Chr11	74.9	T001111280m	scaffold_32	244735
Chr11	80.1	s008003841-2	scaffold_21	14824
Chr11	79.6	s008003458-2	scaffold_21	406930
Chr11	79.6	Satt519	scaffold_21	886506
Chr11	79.6	s008002161-2	scaffold_21	1546311
Chr11	79.6	s008000965-2	scaffold_21	2877395
Chr11	77.4	GMES0027	scaffold_21	3388081
Chr11	97.9	GMES2944	Chr11	13718116
Chr11	98.4	s019400004	Chr11	15790291
Chr11	98.4	s010300014	Chr11	15812389
Chr11	98.7	s011500007	Chr11	18581497
Chr11	99.5	s004503530-2	Chr11	21603186
Chr11	99.2	Satt332	Chr11	23024614
Chr11	81.8	T001115342m	Chr11	24843454
Chr11	85	T001115835m	Chr11	25342287
Chr11	88.6	GMES0675	Chr11	26277783
Chr11	90.8	T001116639s	Chr11	26608321
Chr11	93.8	Sat_348	Chr11	26863332
Chr11	94	Satt597	Chr11	27034965
Chr11	99.5	s004504766-2	scaffold_22	190744
Chr11	99.5	s004505064-2	scaffold_22	490444
Chr11	99.5	s004506014-2	Chr11	25635064
Chr11	100	s004507090-2	Chr11	28009064
Chr13	0.8	GMES1672	Chr13	888124
Chr13	0.5	Satt146	Chr13	1357493
Chr13	0.5	T001313439l	Chr13	1717198
Chr13	0.5	T001313681l	Chr13	1980236
Chr13	0.5	T001314138m	Chr13	2427311
Chr13	0.5	T001314272m	Chr13	2560889
Chr13	0.5	T001316370s	Chr13	4895686
Chr13	0.5	T001317338m	Chr13	5869323
Chr13	0	T001320046m	Chr13	6769027
Chr13	0	T001319486m	Chr13	7319987
Chr13	0	T001319133l	Chr13	7675235
Chr13	0.3	T001318664l	Chr13	8027540
Chr13	0.5	Satt325	Chr13	8587247
Chr13	1.6	Satt343	Chr13	10391811
Chr14	63	Sat_355	Chr14	13587514
Chr14	70.7	T001435717m	Chr14	18889235
Chr14	63.8	T001418240m	Chr14	22373532
Chr14	64.9	GMES4127	Chr14	26042606
Chr14	64.9	GMES0016	Chr14	28514396
Chr14	64.9	GMES5996	Chr14	28987541
Chr14	65.2	T001425271l	Chr14	29394202
Chr14	65.4	s004007100	Chr14/scaffold_522	30238512
Chr14	65.4	Satt601	Chr14	31286161
Chr14	70.7	s004002046	Chr14	35344964
Chr14	70.7	Satt556	Chr14	38861141
Chr14	70.7	s003600119	Chr14	39068156
Chr18	59.5	s000403406-2	Chr18	9335021
Chr18	60.3	GMES0241	Chr18	9953214
Chr18	60	Satt394	Chr18	10003381
Chr18	61.6	T001811100m	Chr18	11124085

## Sheet: TableS5
Supplementary Table S5. BAC-end sequences (BES) mapped in the G.max cv. Enrei genome assembly
BAC name	Chromosome	Forward		Reverse
		Start position (bp)	End position (bp)	Start position (bp)	End position (bp)
GMJENa0108K09	Chr01	230431	229802	45963	46462
GMJENa0134C01	Chr01	217434	216878	56359	57025
GMJENa0111O08	Chr01	219495	218877	66544	67086
GMJENb0121B23	Chr01	203482	202814	79558	80285
GMJENa0112I18	Chr01	81410	80801	202917	202285
GMJENa0121P03	Chr01	81353	80852	154352	153758
GMJENa0072B02	Chr01	94515	95142	277115	276509
GMJENa0096C23	Chr01	118483	119161	297209	296482
GMJENa0209J16	Chr01	277932	277434	119246	119971
GMJENa0130K11	Chr01	120269	120967	216693	215957
GMJENa0166A20	Chr01	313131	312454	131510	132132
GMJENa0021O10	Chr01	315243	314668	141364	141978
GMJENa0174D19	Chr01	152859	153429	313092	312559
GMJENa0039N19	Chr01	344948	344253	166760	167441
GMJENa0001O04	Chr01	166768	167396	344885	344211
GMJENb0014O16R1	Chr01	234829	235381	352260	351840
GMJENa0133G17	Chr01	271679	272397	423863	423296
GMJENa0170C01	Chr01	451991	451304	284294	284999
GMJENb0005J24	Chr01	285078	285546	388206	387575
GMJENa0166M06	Chr01	297240	297786	469917	469593
GMJENa0190H15	Chr01	461934	461302	353348	353981
GMJENb0055N21	Chr01	389439	390108	467169	466606
GMJENa0088M13	Chr01	574321	573584	411581	412174
GMJENb0062A22	Chr01	544591	545124	647179	646559
GMJENb0009A03	Chr01	670472	669775	570124	570772
GMJENa0134I01	Chr01	615223	615731	745075	744592
GMJENb0111N13	Chr01	806178	805624	708154	708644
GMJENa0077I11	Chr01	881814	881361	738550	739184
GMJENb0096P24	Chr01	920202	920708	1058236	1057787
GMJENa0106E24	Chr01	923345	923974	1107564	1106951
GMJENb0002K08	Chr01	1030867	1030495	958656	959154
GMJENb0017K05	Chr01	1091884	1091355	1015121	1015615
GMJENb0096K02	Chr01	1122363	1122928	1240347	1240016
GMJENb0004K03	Chr01	1390555	1390067	1276970	1277432
GMJENb0022O02	Chr01	1577519	1577043	1460313	1461002
GMJENb0067J20	Chr01	2048650	2048248	1919675	1920135
GMJENb0004P08	Chr01	2045910	2045360	1932966	1933611
GMJENb0059M22	Chr01	2085358	2084834	1964630	1965182
GMJENa0203N09	Chr01	2114093	2113468	1997507	1998059
GMJENb0065A20	Chr01	2152059	2151420	2055336	2055943
GMJENb0023P13	Chr01	2099514	2100009	2207574	2207056
GMJENa0105N12	Chr01	2124646	2125098	2291720	2291296
GMJENa0162I18	Chr01	2145365	2146010	2317915	2317564
GMJENa0172B23R1	Chr01	2160468	2160993	2318192	2317565
GMJENb0033L17	Chr01	2176017	2176729	2305404	2305073
GMJENa0085N24	Chr01	2403567	2403016	2215561	2215976
GMJENa0092H01	Chr01	2262633	2262985	2424128	2423767
GMJENb0116G14	Chr01	2266271	2266790	2368853	2368182
GMJENb0009J10	Chr01	2323676	2324363	2409696	2409098
GMJENa0081D04	Chr01	2539286	2538776	2401934	2402483
GMJENa0100H21	Chr01	2576047	2575692	2421335	2421760
GMJENb0076N01	Chr01	2700238	2700866	2842286	2841694
GMJENa0114O16	Chr01	2766330	2767036	2820032	2819326
GMJENa0091D23	Chr01	2946626	2946044	2769528	2770140
GMJENb0054O11	Chr01	2793515	2794191	2898145	2897486
GMJENa0100H17	Chr01	2985807	2985215	2798596	2799090
GMJENa0103F17	Chr01	2985807	2985162	2813058	2813656
GMJENb0015E05	Chr01	2951264	2951868	3060706	3060070
GMJENb0016A15	Chr01	3049065	3049744	3162021	3161312
GMJENa0002D16	Chr01	3049200	3049549	3217747	3217365
GMJENb0072E03R1	Chr01	3064345	3064932	3185727	3185229
GMJENb0045L24	Chr01	3176019	3175517	3081664	3082159
GMJENb0065N22	Chr01	3104833	3105255	3209123	3208637
GMJENa0108D01	Chr01	3185147	3184385	3116506	3117241
GMJENb0055P02	Chr01	3209936	3209233	3138816	3139489
GMJENb0059M19	Chr01	3207109	3207750	3294343	3293707
GMJENb0028I11	Chr01	3558162	3558801	3652812	3652159
GMJENb0036K16	Chr01	3653380	3652734	3573933	3574404
GMJENb0101B14	Chr01	3794115	3793374	3629291	3630032
GMJENa0060L20	Chr01	3646695	3647174	3819590	3819052
GMJENb0023H17	Chr01	3706130	3706770	3835291	3834730
GMJENb0016E11	Chr01	3823491	3823940	3924320	3923734
GMJENb0052E23	Chr01	4094180	4094836	4216584	4215902
GMJENb0061A14	Chr01	4096628	4097334	4197284	4196633
GMJENb0007A11	Chr01	4278509	4278051	4153047	4153571
GMJENa0140F19	Chr01	4326689	4325975	4183670	4184479
GMJENb0054I06	Chr01	4189934	4190514	4298191	4297594
GMJENb0044H08	Chr01	4194138	4194657	4309611	4309151
GMJENa0181P16	Chr01	4331231	4330700	4198954	4199379
GMJENa0138C06	Chr01	4323048	4322372	4206197	4206863
GMJENa0075H21	Chr01	4221735	4222323	4382668	4382009
GMJENa0094I19	Chr01	4397367	4396605	4221759	4222414
GMJENa0071N11	Chr01	4443612	4443197	4269306	4269767
GMJENb0002H17	Chr01	4343163	4342492	4276496	4277121
GMJENb0032C20	Chr01	4287004	4287441	4420834	4420457
GMJENb0054H12	Chr01	4426620	4425903	4297915	4298559
GMJENb0031N02	Chr01	4412523	4412040	4307163	4307938
GMJENa0152G20	Chr01	4397309	4396655	4337433	4338032
GMJENb0008G07	Chr01	4448009	4447371	4352744	4353230
GMJENa0113N10	Chr01	4356438	4356998	4468566	4467934
GMJENb0019O14	Chr01	4375736	4376284	4488631	4488037
GMJENa0072P07	Chr01	4544676	4544313	4384807	4385159
GMJENb0076P13	Chr01	4514376	4513700	4401045	4401690
GMJENa0068E15	Chr01	4403828	4404200	4562705	4562294
GMJENa0074K23	Chr01	4421161	4421681	4494653	4494136
GMJENa0059N21	Chr01	4571429	4570773	4433693	4434318
GMJENa0122M15	Chr01	4616040	4615608	4441313	4441726
GMJENb0121A18	Chr01	4596233	4595601	4478529	4479203
GMJENb0062F12	Chr01	4612254	4611851	4481562	4482056
GMJENb0061K08	Chr01	4599905	4599272	4497929	4498425
GMJENb0041B09	Chr01	4558623	4559311	4680948	4680312
GMJENb0012B20	Chr01	4584796	4585442	4669670	4668986
GMJENb0101E17	Chr01	4734482	4733915	4599265	4599959
GMJENb0041N01	Chr01	4612416	4613084	4741487	4740778
GMJENa0113N11	Chr01	4656164	4656609	4815923	4815257
GMJENb0015C20	Chr01	4677202	4677799	4779910	4779284
GMJENa0135A10	Chr01	4713387	4714156	4880167	4879494
GMJENa0117O16	Chr01	4880196	4879608	4717964	4718541
GMJENb0056G23	Chr01	4822186	4821815	4721725	4722223
GMJENb0072P06R1	Chr01	4925771	4925313	4838742	4839179
GMJENa0113B16	Chr01	5046687	5046064	4923382	4923993
GMJENb0016B13	Chr01	4949790	4950541	5049991	5049231
GMJENb0056F11	Chr01	4993972	4994642	5080847	5080229
GMJENa0182A09	Chr01	5120219	5120725	5266289	5265692
GMJENb0048M16	Chr01	5261681	5261306	5124543	5125109
GMJENa0133N11	Chr01	5307366	5306621	5134829	5135534
GMJENa0091E16	Chr01	5287989	5287229	5134840	5135550
GMJENb0059K14	Chr01	5147115	5147604	5248475	5248065
GMJENa0089P10	Chr01	5307366	5306715	5151251	5151685
GMJENa0201G12	Chr01	5167770	5168429	5307305	5306842
GMJENa0096G08	Chr01	5345051	5344569	5167794	5168420
GMJENa0105K17	Chr01	5282394	5281763	5176685	5177359
GMJENb0050I10	Chr01	5292950	5292508	5176974	5177360
GMJENb0008P10	Chr01	5276693	5276131	5189253	5189857
GMJENa0023C03	Chr01	5465558	5464868	5318841	5319441
GMJENa0049K19	Chr01	5487990	5487568	5337290	5337670
GMJENa0002O16	Chr01	5483807	5483186	5337463	5337951
GMJENa0140J02	Chr01	5365447	5366080	5516635	5515918
GMJENa0100K17	Chr01	5523420	5523095	5371587	5372169
GMJENb0052E16	Chr01	5408876	5409599	5478853	5478165
GMJENa0111M03	Chr01	5564857	5564274	5410828	5411390
GMJENb0063M19	Chr01	5494256	5493849	5411210	5411806
GMJENa0112A23	Chr01	5555551	5554913	5419433	5420132
GMJENb0002H15	Chr01	5467084	5467540	5586079	5585501
GMJENb0023I12	Chr01	5467091	5467737	5571392	5570685
GMJENb0007L21	Chr01	5468562	5468967	5569606	5569074
GMJENa0102O04	Chr01	5484060	5484672	5652788	5652157
GMJENa0018C21	Chr01	5644464	5643866	5497755	5498348
GMJENa0201D21	Chr01	5696648	5696203	5543539	5544048
GMJENb0050J07	Chr01	5588914	5589399	5666402	5665877
GMJENa0120C12	Chr01	5589085	5589783	5774610	5773836
GMJENa0104H04	Chr01	5641234	5641813	5808958	5808409
GMJENa0161B14	Chr01	5841158	5840618	5662617	5663181
GMJENa0141G24	Chr01	5736719	5737157	5930185	5929585
GMJENb0072K19R1	Chr01	5740093	5740461	5854965	5854466
GMJENa0003P09	Chr01	5754095	5754419	5939148	5938484
GMJENa0089O17	Chr01	6016153	6015559	5850745	5851441
GMJENa0139H20	Chr01	5928430	5929050	6094167	6093520
GMJENa0073O06	Chr01	5986425	5987007	6141699	6141104
GMJENa0179B23	Chr01	6022155	6022793	6183360	6182689
GMJENb0048F15	Chr01	6193758	6193332	6022850	6023396
GMJENa0170B08	Chr01	6024869	6025463	6216828	6216372
GMJENa0177L08	Chr01	6186009	6185344	6046814	6047571
GMJENb0076P04	Chr01	6065665	6066410	6151464	6150776
GMJENb0116C21	Chr01	6070694	6071338	6172426	6171748
GMJENa0026I19	Chr01	6074149	6074782	6215174	6214560
GMJENb0081A09	Chr01	6180669	6180014	6076703	6077334
GMJENa0008C01	Chr01	6269409	6268911	6094232	6094964
GMJENa0164B22	Chr01	6109888	6110457	6275471	6274909
GMJENa0124L14	Chr01	6275469	6274790	6110586	6111279
GMJENb0101J18	Chr01	6122821	6123514	6245769	6245067
GMJENb0050B22	Chr01	6135526	6135994	6248894	6248408
GMJENa0209I24	Chr01	6311020	6310546	6148709	6149085
GMJENb0011C14	Chr01	6171225	6171913	6318512	6317724
GMJENb0013K07	Chr01	6328258	6327729	6197569	6198034
GMJENa0141D15	Chr01	6359425	6358698	6216365	6217169
GMJENa0182E16	Chr01	6259731	6260316	6423083	6422470
GMJENa0126L09	Chr01	6278030	6278716	6447739	6447047
GMJENa0126O18	Chr01	6434019	6433315	6278057	6278780
GMJENb0060I09	Chr01	6290645	6291212	6383356	6382875
GMJENa0137G03	Chr01	6487585	6486915	6314567	6315303
GMJENa0187D19	Chr01	6330653	6331173	6475255	6474935
GMJENa0148H13	Chr01	6497098	6496599	6330882	6331536
GMJENa0170G04	Chr01	6524560	6523990	6337061	6337678
GMJENb0043O05	Chr01	6341570	6342138	6473411	6473049
GMJENa0084P12	Chr01	6534204	6533465	6343887	6344522
GMJENa0070E14	Chr01	6350175	6350745	6526902	6526378
GMJENa0194C14	Chr01	6357242	6357723	6526670	6526173
GMJENb0063B18	Chr01	6375324	6375854	6501287	6500652
GMJENb0025I14	Chr01	6590243	6589728	6408548	6409091
GMJENa0178G07	Chr01	6409055	6409446	6563677	6562993
GMJENa0074E18	Chr01	6411392	6411970	6562019	6561612
GMJENa0146L23	Chr01	6411392	6411928	6468824	6468282
GMJENa0056P04	Chr01	6416871	6417294	6574841	6574269
GMJENa0134L07	Chr01	6609341	6608856	6434055	6434576
GMJENa0181D13	Chr01	6445091	6445703	6607410	6606846
GMJENa0017H04	Chr01	6513874	6513362	6449157	6449836
GMJENa0196N07	Chr01	6638921	6638543	6475432	6476062
GMJENa0187E03	Chr01	6628428	6627692	6475457	6475968
GMJENa0146H16	Chr01	6691683	6691120	6509685	6510129
GMJENb0020M15	Chr01	6523014	6523621	6623268	6622674
GMJENb0056I06	Chr01	6533669	6534302	6644038	6643426
GMJENb0027A15	Chr01	6754976	6754379	6651656	6652372
GMJENb0086E09	Chr01	6796093	6795502	6685436	6685988
GMJENb0091D02	Chr01	6790382	6789780	6686079	6686626
GMJENa0165D05	Chr01	6695408	6696026	6859967	6859408
GMJENb0032C14	Chr01	6776986	6777409	6888969	6888607
GMJENa0130P13	Chr01	6780881	6781529	6945323	6944645
GMJENa0200K12	Chr01	6791273	6791806	6948021	6947466
GMJENa0118L04	Chr01	6815887	6816516	6976017	6975344
GMJENa0192D02	Chr01	6819756	6820189	6976017	6975552
GMJENa0126B05	Chr01	6843376	6844068	7019385	7018686
GMJENa0202I22	Chr01	6844186	6844707	6997125	6996586
GMJENa0159P07	Chr01	6872256	6872813	7020445	7019980
GMJENa0179G22	Chr01	7019420	7018870	6893246	6893830
GMJENa0107D04	Chr01	7270066	7269390	7113137	7113813
GMJENa0077M22	Chr01	7310571	7310934	7499443	7498833
GMJENb0111L23	Chr01	7407841	7407042	7325686	7326369
GMJENa0100C01	Chr01	7344862	7345542	7513579	7512886
GMJENa0128L14	Chr01	7438254	7437753	7344881	7345595
GMJENb0035I09	Chr01	7346295	7346862	7459849	7459423
GMJENa0090A07	Chr01	7513602	7512875	7362947	7363529
GMJENa0168B18	Chr01	7647289	7646732	7501096	7501655
GMJENb0096M16	Chr01	7630141	7629544	7519910	7520508
GMJENa0080F10	Chr01	7702858	7703455	7897489	7896944
GMJENa0168C12	Chr01	7897318	7896892	7713603	7714155
GMJENa0104H10	Chr01	7904385	7903672	7725966	7726618
GMJENb0024L14	Chr01	7850888	7850567	7738132	7738461
GMJENb0003O19	Chr01	7873621	7872917	7748593	7749208
GMJENa0184A17	Chr01	7754859	7755507	7907195	7906637
GMJENa0095P24	Chr01	7754924	7755602	7918403	7917755
GMJENa0199L04	Chr01	7983117	7982743	7771836	7772179
GMJENa0090B03	Chr01	7991294	7990595	7789525	7790174
GMJENa0203J09	Chr01	7820699	7821404	8016577	8015938
GMJENa0087E12	Chr01	8049709	8048973	7821870	7822579
GMJENb0016N15	Chr01	7850052	7850842	7991996	7991232
GMJENa0067D01	Chr01	7876693	7877128	8118534	8117849
GMJENa0179I01	Chr01	7897838	7898310	8085908	8085431
GMJENa0123A10	Chr01	7959491	7958799	7902670	7903391
GMJENb0059O17	Chr01	7911386	7911917	8077503	8076937
GMJENa0064L04	Chr01	8178046	8177715	7953648	7954126
GMJENb0059H17	Chr01	7954624	7955190	8103665	8103131
GMJENa0073J12	Chr01	7958024	7958564	8110272	8109680
GMJENb0001C13	Chr01	7982847	7983537	8094962	8094270
GMJENa0090O05	Chr01	8228928	8228355	8049833	8050371
GMJENb0055M19	Chr01	8080231	8080915	8187988	8187345
GMJENa0162D12	Chr01	8086030	8086518	8215401	8214786
GMJENb0044E16	Chr01	8086506	8087072	8186937	8186375
GMJENb0022F06	Chr01	8243707	8243301	8131041	8131742
GMJENb0010D14	Chr01	8142922	8143245	8262845	8262327
GMJENb0051P03	Chr01	8233347	8232659	8146225	8146887
GMJENa0097N04	Chr01	8158620	8159228	8318680	8317934
GMJENb0020H09	Chr01	8275596	8274983	8164228	8164903
GMJENa0092J11	Chr01	8361970	8361257	8215773	8216423
GMJENa0090A12	Chr01	8226190	8226934	8379051	8378363
GMJENa0076K15	Chr01	8227503	8228028	8361278	8360667
GMJENa0197C18	Chr01	8227503	8227974	8368985	8368578
GMJENa0033A09	Chr01	8371108	8370576	8233849	8234445
GMJENb0036J15	Chr01	8358528	8357845	8265217	8265816
GMJENb0054B20	Chr01	8375851	8375166	8266468	8267142
GMJENa0089H21	Chr01	8415939	8415261	8274310	8274718
GMJENa0060F04	Chr01	8318747	8319115	8485630	8485226
GMJENa0097A21	Chr01	8470210	8469493	8319839	8320386
GMJENa0003E22	Chr01	8472098	8471487	8325383	8325755
GMJENb0011E03	Chr01	8432348	8431627	8328968	8329567
GMJENb0101D02	Chr01	8441240	8440538	8331302	8331962
GMJENb0022B19	Chr01	8418175	8417832	8340452	8341018
GMJENb0041O07	Chr01	8486920	8486334	8365353	8365944
GMJENa0120J24	Chr01	8610823	8610124	8415967	8416699
GMJENa0147E05	Chr01	8618405	8618046	8437371	8437780
GMJENa0081O23	Chr01	8470284	8470825	8637716	8637101
GMJENb0096K23	Chr01	8596465	8595822	8485903	8486524
GMJENa0110O16	Chr01	8723856	8723361	8551772	8552465
GMJENa0104A04	Chr01	8697157	8696524	8553125	8553816
GMJENa0182F12	Chr01	8580011	8580500	8741058	8740567
GMJENb0046B24	Chr01	8681513	8680850	8584638	8585296
GMJENa0105C20	Chr01	8754406	8753754	8594497	8595110
GMJENb0012N10	Chr01	8597428	8598023	8705678	8705044
GMJENa0094A06	Chr01	8741085	8740375	8618759	8619427
GMJENb0086M06	Chr01	8721994	8721295	8628431	8629001
GMJENa0141M05	Chr01	8637757	8638319	8809110	8808513
GMJENb0015G08	Chr01	8657065	8657657	8769852	8769242
GMJENa0037D17	Chr01	8658441	8658962	8843852	8843325
GMJENa0021L22	Chr01	8821493	8820973	8660904	8661500
GMJENa0139J22	Chr01	8662856	8663487	8842885	8842192
GMJENa0201K18	Chr01	8827128	8826626	8680959	8681571
GMJENa0108L02	Chr01	8861631	8861112	8683432	8684218
GMJENa0056H11	Chr01	8901236	8900587	8718741	8719097
GMJENa0064I15	Chr01	8723865	8724229	8885169	8884704
GMJENa0059C13	Chr01	8744682	8745268	8945233	8944669
GMJENa0126F05	Chr01	8744682	8745375	8900883	8900122
GMJENa0080M02	Chr01	8909200	8908571	8748548	8749129
GMJENb0026F05	Chr01	8757388	8757882	8870590	8869991
GMJENb0033G06	Chr01	8893872	8893200	8761400	8762095
GMJENa0178N20	Chr01	8770542	8771171	8843841	8843136
GMJENa0075O11	Chr01	8949405	8948794	8783130	8783768
GMJENa0120D14	Chr01	8783166	8783832	8952080	8951350
GMJENb0067H05	Chr01	8863927	8863489	8784525	8784856
GMJENa0196C24	Chr01	8942694	8942355	8790300	8790900
GMJENa0107I12	Chr01	8951120	8950736	8792506	8793138
GMJENa0086H10	Chr01	8792978	8793618	8944774	8944201
GMJENa0024M13	Chr01	8854511	8855064	9022094	9021513
GMJENa0135C10	Chr01	8923110	8923699	9083765	9083130
GMJENb0027B13	Chr01	8923999	8924628	9038311	9037956
GMJENb0035M11	Chr01	8974197	8974731	9096239	9095890
GMJENa0109A22	Chr01	9201599	9200871	9016677	9017412
GMJENa0111G05	Chr01	9138910	9138230	9016777	9017438
GMJENa0171K17	Chr01	9017723	9018313	9174683	9174177
GMJENb0048B07	Chr01	9112232	9111867	9021352	9021880
GMJENa0179K21	Chr01	9202055	9201528	9039871	9040326
GMJENb0025L07	Chr01	9137532	9136943	9045851	9046458
GMJENa0007O17	Chr01	9053554	9054175	9201767	9201401
GMJENb0009G19	Chr01	9061228	9061895	9183458	9182888
GMJENa0150P23	Chr01	9064779	9065498	9234003	9233278
GMJENa0162L16	Chr01	9066730	9067102	9234020	9233366
GMJENa0032C10	Chr01	9226878	9226320	9077068	9077673
GMJENa0155F06	Chr01	9260408	9259735	9081942	9082622
GMJENa0078P22	Chr01	9082554	9083181	9260392	9259814
GMJENa0177H06	Chr01	9234063	9233421	9083793	9084414
GMJENa0138P02	Chr01	9271478	9270862	9114976	9115586
GMJENa0174B04	Chr01	9260408	9259836	9115391	9116059
GMJENa0082O05	Chr01	9142124	9142534	9257294	9256709
GMJENa0087I17	Chr01	9146393	9147095	9300512	9299874
GMJENa0008J21	Chr01	9149011	9149686	9293612	9292802
GMJENb0047K09	Chr01	9161659	9162289	9269157	9268543
GMJENa0130K15	Chr01	9202066	9202764	9260392	9259582
GMJENb0011M22	Chr01	9328605	9329358	9452573	9451814
GMJENa0128D20	Chr01	9330550	9331203	9513225	9512500
GMJENb0041E23	Chr01	9380151	9380890	9513465	9512755
GMJENa0130B06	Chr01	9392509	9393230	9579203	9578418
GMJENb0091B19	Chr01	9541358	9540601	9402594	9403310
GMJENa0020F22	Chr01	9419583	9420153	9556783	9556203
GMJENa0021E21	Chr01	9419637	9420218	9556803	9556110
GMJENa0209C16	Chr01	9446771	9447397	9594945	9594302
GMJENa0133O18	Chr01	9491003	9491715	9655517	9654918
GMJENa0072N11	Chr01	9491006	9491663	9606860	9606268
GMJENa0196A01	Chr01	9655287	9654960	9491296	9491714
GMJENb0060A13	Chr01	9510453	9511116	9638122	9637523
GMJENa0142C14	Chr01	9538321	9538904	9688664	9687926
GMJENa0036L03	Chr01	9718301	9717811	9542950	9543510
GMJENb0023L08	Chr01	9682491	9681879	9549758	9550392
GMJENb0131D11	Chr01	9666724	9665919	9551639	9552420
GMJENa0195N22	Chr01	9557437	9557962	9714827	9714389
GMJENb0086C13	Chr01	9559100	9559904	9679888	9679087
GMJENa0091A14	Chr01	9718310	9717690	9572490	9573189
GMJENa0169I07	Chr01	9757852	9757499	9580963	9581685
GMJENa0110E10	Chr01	9593860	9594595	9775314	9774699
GMJENa0128B21	Chr01	9595018	9595738	9757306	9756550
GMJENa0071K04	Chr01	9595046	9595548	9759974	9759522
GMJENb0028O03	Chr01	9731445	9730851	9606100	9606718
GMJENb0057J16	Chr01	9750728	9750158	9625438	9625821
GMJENa0135K05	Chr01	9626344	9626962	9760049	9759499
GMJENa0019M15	Chr01	9626517	9626961	9786077	9785423
GMJENb0060K16	Chr01	9765673	9765012	9652981	9653579
GMJENb0106M12	Chr01	9668957	9669501	9800087	9799547
GMJENa0136A05	Chr01	9680143	9680892	9865367	9864546
GMJENa0177A18	Chr01	9681300	9681948	9831082	9830685
GMJENa0127M13	Chr01	9876145	9875507	9683075	9683752
GMJENa0173M08	Chr01	9706190	9706880	9865332	9864619
GMJENa0034D09	Chr01	9912769	9912255	9722696	9723284
GMJENb0052O15	Chr01	9738020	9738714	9832198	9831479
GMJENb0067L21	Chr01	9932769	9932339	9784850	9785280
GMJENb0005A08	Chr01	9791508	9792107	9894417	9893816
GMJENa0010A23	Chr01	9804701	9805359	9856447	9855722
GMJENa0140G15	Chr01	9815546	9816229	9979560	9978830
GMJENb0054H03	Chr01	9936306	9935594	9830390	9830936
GMJENa0133B18	Chr01	9851944	9852592	10023964	10023347
GMJENa0165M20	Chr01	10023830	10023343	9851953	9852496
GMJENa0073H10	Chr01	10009743	10009190	9856519	9857012
GMJENa0003I10	Chr01	9865700	9866081	10009721	10009074
GMJENa0193B05	Chr01	10023830	10023328	9889599	9890035
GMJENa0111N07	Chr01	10054093	10053431	9892664	9893327
GMJENa0076K19	Chr01	10088306	10087848	9911853	9912491
GMJENa0197I15	Chr01	9914127	9914538	10065865	10065390
GMJENa0072A07	Chr01	9919804	9920385	10136494	10135837
GMJENa0082D14	Chr01	10093574	10092973	9925416	9926048
GMJENb0041L05	Chr01	9925428	9926117	10007125	10006548
GMJENb0045C01	Chr01	9943927	9944489	10052474	10051929
GMJENb0067F18	Chr01	9951364	9951782	10065471	10065034
GMJENb0060E02	Chr01	9954976	9955602	10063540	10063116
GMJENa0017C07	Chr01	9957155	9957748	10122413	10121805
GMJENa0111B13	Chr01	9995314	9996012	10166942	10166284
GMJENb0022N04	Chr01	10101073	10100651	10006881	10007573
GMJENa0107E14	Chr01	10023841	10024509	10170659	10169910
GMJENb0010P15	Chr01	10027084	10027692	10136061	10135526
GMJENa0086D06	Chr01	10103935	10103408	10029789	10030302
GMJENa0206L22	Chr01	10050506	10051025	10189654	10189079
GMJENa0206A03	Chr01	10073240	10073624	10251493	10250954
GMJENb0040E07	Chr01	10079511	10080097	10183020	10182494
GMJENa0163P13	Chr01	10278856	10278241	10105353	10105901
GMJENa0003E05	Chr01	10274971	10274375	10108002	10108334
GMJENb0018M12	Chr01	10110834	10111250	10171029	10170436
GMJENa0095F10	Chr01	10278704	10278039	10119236	10119912
GMJENa0198P02	Chr01	10263106	10262508	10122568	10123222
GMJENb0014K24R1	Chr01	10128291	10128954	10227134	10226625
GMJENa0186P21	Chr01	10314415	10313836	10139217	10139677
GMJENb0064I06	Chr01	10140054	10140700	10224103	10223517
GMJENa0069D18	Chr01	10329298	10328742	10148993	10149631
GMJENb0044L08	Chr01	10150451	10150879	10242665	10242121
GMJENa0117J06	Chr01	10322060	10321647	10164672	10165316
GMJENb0053N04	Chr01	10171617	10172313	10298766	10298209
GMJENa0101A17	Chr01	10336062	10335365	10184721	10185391
GMJENa0111H14	Chr01	10190274	10190928	10348472	10347881
GMJENb0016B04	Chr01	10227193	10227902	10350629	10349910
GMJENa0072B06	Chr01	10450478	10449833	10267405	10268013
GMJENa0099B01	Chr01	10335202	10334597	10273509	10274182
GMJENb0005E15	Chr01	10383248	10382727	10274794	10275229
GMJENa0044J04	Chr01	10452247	10451621	10275004	10275545
GMJENa0050K22	Chr01	10277341	10277862	10466012	10465573
GMJENa0098O04	Chr01	10466692	10465946	10277684	10278334
GMJENa0182A14	Chr01	10430124	10429636	10277709	10278255
GMJENa0097G17	Chr01	10480188	10479508	10307317	10308063
GMJENa0172K13R1	Chr01	10475940	10475559	10314450	10314953
GMJENa0004L18	Chr01	10481334	10480753	10324224	10324864
GMJENa0173G09	Chr01	10480836	10480413	10331607	10332233
GMJENa0099H03	Chr01	10335228	10335776	10513887	10513317
GMJENa0016I10	Chr01	10525419	10524763	10336088	10336802
GMJENb0005F05	Chr01	10537861	10537412	10413434	10413975
GMJENb0064F14	Chr01	10423345	10423954	10528032	10527473
GMJENb0041P20	Chr01	10458354	10458817	10559210	10558494
GMJENb0019F21	Chr01	10469124	10469685	10611013	10610449
GMJENa0037O11	Chr01	10471373	10471900	10539116	10538617
GMJENb0005J22	Chr01	10594102	10593507	10482782	10483311
GMJENb0042D15	Chr01	10608254	10607814	10492474	10492949
GMJENb0101N14	Chr01	10647395	10646755	10502484	10503052
GMJENa0168I15	Chr01	10720509	10720044	10566338	10566856
GMJENb0005M08	Chr01	10568860	10569455	10678106	10677493
GMJENb0039G24	Chr01	10569709	10570188	10661198	10660763
GMJENb0064C16	Chr01	10577199	10577868	10683068	10682466
GMJENa0127O14	Chr01	10588691	10589334	10749259	10748531
GMJENa0194K10	Chr01	10736288	10735747	10591708	10592096
GMJENb0003M22	Chr01	10683083	10682536	10601194	10601941
GMJENa0111L15	Chr01	10617837	10618595	10772213	10771457
GMJENb0081I02	Chr01	10641873	10642500	10761832	10761275
GMJENa0120D24	Chr01	10798286	10797646	10643996	10644699
GMJENa0050B22	Chr01	10676092	10676431	10847969	10847384
GMJENb0086K19	Chr01	10827171	10826654	10706812	10707412
GMJENa0088K19	Chr01	10932317	10931635	10749735	10750403
GMJENa0110I22	Chr01	10936519	10936037	10786784	10787317
GMJENa0056L13	Chr01	10956270	10955897	10793139	10793731
GMJENa0102B18	Chr01	10975962	10975341	10796230	10796828
GMJENa0182P07	Chr01	10812058	10812643	10971965	10971437
GMJENa0076E03	Chr01	10862257	10862829	11036958	11036433
GMJENa0081O09	Chr01	11004783	11004319	10865468	10865974
GMJENa0032J09	Chr01	11012839	11012487	10867389	10867986
GMJENb0007C05	Chr01	10975602	10975025	10877406	10877914
GMJENb0064H11	Chr01	10879322	10879840	10981899	10981353
GMJENb0059C18	Chr01	10985811	10985174	10901483	10902041
GMJENb0019M17	Chr01	11039596	11039015	10922077	10922658
GMJENa0133O09	Chr01	11092688	11092261	10924258	10924991
GMJENa0040O05	Chr01	11072022	11071452	10924284	10924843
GMJENb0004O15	Chr01	10970866	10971483	11050483	11049790
GMJENb0071H02	Chr01	11109984	11109331	11000784	11001380
GMJENb0001E21	Chr01	11014196	11014935	11131291	11130584
GMJENb0051C17	Chr01	11125621	11124910	11027357	11028055
GMJENa0197G12	Chr01	11036995	11037581	11217715	11217193
GMJENb0026E02	Chr01	11037241	11037921	11158164	11157554
GMJENb0033F11	Chr01	11041246	11041946	11108146	11107461
GMJENb0048D22	Chr01	11146549	11146154	11047671	11048136
GMJENa0129N06	Chr01	11213361	11212756	11061799	11062452
GMJENa0096P03	Chr01	11077194	11077872	11251693	11251024
GMJENa0103E06	Chr01	11219424	11218721	11121825	11122548
GMJENb0009A07	Chr01	11139740	11140407	11280460	11279850
GMJENa0178P23	Chr01	11334626	11333934	11160138	11160831
GMJENb0048E09	Chr01	11165703	11166079	11265345	11264903
GMJENa0098C08	Chr01	11166669	11167325	11338160	11337393
GMJENa0166A21	Chr01	11219455	11220027	11359482	11358946
GMJENb0037I08	Chr01	11224470	11225150	11353678	11352985
GMJENb0012N17	Chr01	11226838	11227530	11327577	11326919
GMJENb0116J18	Chr01	11238162	11238830	11354675	11353957
GMJENa0123C23	Chr01	11431878	11431296	11269127	11269797
GMJENb0096F22	Chr01	11285473	11286055	11413977	11413340
GMJENa0052N23	Chr01	11417613	11417061	11328121	11328697
GMJENb0001I13	Chr01	11372288	11373016	11488976	11488338
GMJENa0101E21	Chr01	11544694	11544019	11379666	11380066
GMJENa0067N01	Chr01	11552874	11552303	11385150	11385779
GMJENa0049B04	Chr01	11554162	11553691	11385766	11386224
GMJENb0057H20	Chr01	11398383	11398820	11508866	11508182
GMJENa0046P11	Chr01	11415850	11416449	11686819	11686279
GMJENa0009C17	Chr01	11504649	11504015	11430190	11430865
GMJENa0050F01	Chr01	11430652	11431055	11597994	11597612
GMJENa0135E05	Chr01	11436577	11437287	11616056	11615339
GMJENb0059B01	Chr01	11466202	11466634	11582080	11581503
GMJENa0139I08	Chr01	11489141	11489853	11687506	11686919
GMJENa0035N09	Chr01	11492268	11492782	11679314	11678866
GMJENa0103K19	Chr01	11518384	11519085	11687506	11686860
GMJENa0117L16	Chr01	11531841	11532519	11699658	11698996
GMJENa0009I17	Chr01	11544706	11545352	11707375	11706651
GMJENa0159F18	Chr01	11727242	11726631	11544737	11545139
GMJENa0002I20	Chr01	11749134	11748586	11548157	11548648
GMJENa0039P13	Chr01	11753492	11752844	11582929	11583564
GMJENa0194P06	Chr01	11740001	11739503	11598097	11598526
GMJENa0090C08	Chr01	11653464	11652951	11599852	11600530
GMJENb0131J19	Chr01	11726410	11725685	11633338	11634064
GMJENa0056O01	Chr01	11636883	11637377	11791010	11790414
GMJENa0035I02	Chr01	11661197	11661791	11837454	11837018
GMJENa0009M06	Chr01	11661405	11662064	11827325	11826649
GMJENa0187L06	Chr01	11687082	11687819	11807538	11806846
GMJENa0107E12	Chr01	11807280	11806574	11689699	11690438
GMJENb0064F24	Chr01	11690267	11690853	11808396	11807840
GMJENa0066P09	Chr01	11889053	11888578	11694006	11694342
GMJENb0023E20	Chr01	11799975	11799355	11694235	11694877
GMJENb0010B10	Chr01	11844744	11844142	11729709	11730310
GMJENa0181E11	Chr01	11753420	11753856	11914537	11914103
GMJENa0057B23	Chr01	11753731	11754370	11916273	11915671
GMJENb0060B11	Chr01	11768252	11768923	11896511	11895879
GMJENa0064B01	Chr01	11796488	11797124	11987645	11987013
GMJENa0082E24	Chr01	12015159	12014662	11805277	11805715
GMJENb0096N21	Chr01	11915210	11914585	11834476	11835097
GMJENb0044A11	Chr01	11937354	11936819	11838029	11838560
GMJENa0123H20	Chr01	11847263	11847868	12029348	12028617
GMJENa0047I01	Chr01	12029033	12028655	11847290	11847650
GMJENb0062C17	Chr01	11849014	11849529	11998077	11997490
GMJENa0004O16	Chr01	11934735	11934137	11870246	11870937
GMJENa0193C20	Chr01	12049706	12049083	11870316	11870913
GMJENb0076I24	Chr01	12017299	12016568	11883435	11884131
GMJENb0030J09	Chr01	12008657	12008019	11887236	11887894
GMJENa0149M19	Chr01	11889063	11889485	12061985	12061540
GMJENb0116L03	Chr01	12025260	12024606	11907541	11908176
GMJENa0106N13	Chr01	11920114	11920727	12090284	12089569
GMJENb0017E20	Chr01	11943082	11943667	12075131	12074596
GMJENb0060C09	Chr01	11981149	11981817	12094428	12093902
GMJENa0109J14	Chr01	12173541	12172973	11998542	11999142
GMJENa0084C05	Chr01	12179042	12178501	11999348	11999979
GMJENa0092D09	Chr01	12179175	12178499	12010757	12011361
GMJENb0063A18	Chr01	12027132	12027725	12145130	12144550
GMJENa0116D03	Chr01	12221366	12220732	12029953	12030588
GMJENa0169J11	Chr01	12041416	12042142	12179016	12178302
GMJENa0167D16	Chr01	12049720	12050284	12221316	12220964
GMJENa0095C16	Chr01	12232445	12231864	12061538	12062131
GMJENa0074L07	Chr01	12283161	12282744	12105102	12105561
GMJENa0071D15	Chr01	12114784	12115340	12283131	12282579
GMJENa0201G15	Chr01	12333093	12332610	12178167	12178769
GMJENa0175N12	Chr01	12179052	12179648	12333062	12332491
GMJENa0202M21	Chr01	12179052	12179616	12359009	12358580
GMJENa0002C12	Chr01	12179109	12179467	12355202	12354704
GMJENb0064K13	Chr01	12321846	12321222	12222563	12223172
GMJENa0149A24	Chr01	12271940	12272542	12472029	12471424
GMJENa0161C03	Chr01	12285320	12285864	12455532	12455038
GMJENa0124G13	Chr01	12294547	12295205	12460416	12459701
GMJENa0167A03	Chr01	12294547	12295267	12381503	12380945
GMJENb0009B13	Chr01	12402473	12401834	12296641	12297283
GMJENa0105D24	Chr01	12552799	12552056	12384335	12384978
GMJENb0012L21	Chr01	12529295	12528698	12433564	12434174
GMJENa0207D11	Chr01	12537259	12536769	12442923	12443510
GMJENa0067D10	Chr01	12446748	12447328	12576002	12575575
GMJENa0001F04	Chr01	12578828	12578158	12447764	12448303
GMJENb0002N23	Chr01	12457743	12458350	12564670	12564283
GMJENa0036M10	Chr01	12576523	12575968	12465474	12465992
GMJENa0120M05	Chr01	12578803	12578320	12465490	12466043
GMJENa0122I19	Chr01	12597712	12597072	12472109	12472836
GMJENa0140M16	Chr01	12485643	12486423	12576503	12575674
GMJENa0051J02	Chr01	12496618	12497152	12597578	12597025
GMJENa0078H03	Chr01	12616976	12616439	12496654	12497083
GMJENa0080G23	Chr01	12502630	12503033	12597605	12597025
GMJENa0080O23	Chr01	12502631	12503240	12597602	12596984
GMJENa0132G12	Chr01	12512544	12513321	12617219	12616455
GMJENa0112M19	Chr01	12615344	12614693	12530571	12531230
GMJENb0131M16	Chr01	12531242	12531975	12605863	12605106
GMJENa0177J09	Chr01	12537270	12537861	12705237	12704561
GMJENb0050B10	Chr01	12555409	12555881	12615423	12614954
GMJENa0117L19	Chr01	12555889	12556536	12678466	12677729
GMJENa0009H05	Chr01	12670649	12670041	12555912	12556608
GMJENa0072D04	Chr01	12559780	12560407	12733835	12733212
GMJENa0206D03	Chr01	12559780	12560202	12735609	12735046
GMJENa0111F15	Chr01	12638632	12637878	12559813	12560464
GMJENa0020G11	Chr01	12567266	12567914	12704014	12703476
GMJENa0049N16	Chr01	12704746	12704330	12567270	12567838
GMJENb0025J12	Chr01	12569700	12570348	12677947	12677446
GMJENa0128B23	Chr01	12576531	12577175	12704081	12703358
GMJENa0163L22	Chr01	12684334	12683811	12576583	12577122
GMJENa0061A13	Chr01	12578870	12579429	12704079	12703476
GMJENb0060C01	Chr01	12586193	12586837	12693395	12693006
GMJENb0060E01	Chr01	12586223	12586835	12693630	12693072
GMJENb0061C13	Chr01	12692517	12691852	12592231	12592859
GMJENa0119G18	Chr01	12684728	12684142	12597730	12598515
GMJENa0006E19	Chr01	12597754	12598357	12704073	12703426
GMJENa0116A06	Chr01	12792052	12791362	12615389	12616066
GMJENb0062H11	Chr01	12731233	12730812	12615460	12616007
GMJENa0139C17	Chr01	12617281	12617962	12779095	12778373
GMJENb0022M19	Chr01	12671922	12672339	12779574	12779041
GMJENb0067D04	Chr01	12779522	12779054	12686474	12686893
GMJENa0003N24	Chr01	12703991	12704540	12878957	12878402
GMJENb0031C18	Chr01	12716079	12716721	12831268	12830507
GMJENa0182M20	Chr01	12865703	12865162	12722298	12722812
GMJENa0203L11	Chr01	12884012	12883282	12735741	12736352
GMJENa0165N06	Chr01	12792077	12792630	12963743	12963245
GMJENa0093N17	Chr01	12815297	12816005	13009230	13008603
GMJENa0024P07	Chr01	12889867	12889267	12821129	12821726
GMJENa0176C14	Chr01	13027730	13027188	12865849	12866174
GMJENa0150H08	Chr01	12869664	12870308	12962646	12962142
GMJENb0009H05	Chr01	13012017	13011459	12875172	12875760
GMJENb0021K06	Chr01	12882438	12882946	12997502	12997047
GMJENa0120K04	Chr01	13045738	13045117	12882556	12883013
GMJENa0135M17	Chr01	13064990	13064322	12884047	12884712
GMJENa0057L23	Chr01	12900590	12901175	13076321	13075868
GMJENa0159G09	Chr01	12900590	12901095	13061144	13060478
GMJENa0171H09	Chr01	12900590	12901095	13066261	13065657
GMJENa0055E08	Chr01	12914582	12915262	13115017	13114357
GMJENa0092I14	Chr01	13093034	13092406	12914786	12915410
GMJENa0152M14	Chr01	12924149	12924807	13109578	13109133
GMJENa0158F14	Chr01	12931975	12932362	13066258	13065712
GMJENb0001F08	Chr01	12942771	12943565	13038949	13038285
GMJENa0210H09	Chr01	12952842	12953350	13106693	13106162
GMJENa0066C06	Chr01	13072203	13071578	12957460	12958103
GMJENa0044M16	Chr01	13159418	13158836	12959139	12959568
GMJENb0002K11	Chr01	13063590	13063078	12959726	12960303
GMJENa0022O02	Chr01	12960727	12961131	13142703	13141991
GMJENa0026C07	Chr01	12960866	12961232	13142700	13142097
GMJENa0043P13	Chr01	12963814	12964196	13142566	13142218
GMJENa0129A10	Chr01	13139408	13138714	12963845	12964581
GMJENa0097F03	Chr01	13145688	13145025	12968605	12969256
GMJENb0062C05	Chr01	12976559	12976965	13118184	13117632
GMJENa0025M19	Chr01	13178515	13177938	13009292	13009889
GMJENb0021C06	Chr01	13030372	13030966	13127055	13126514
GMJENa0140E09	Chr01	13061183	13061860	13243039	13242320
GMJENb0019D19	Chr01	13183027	13182421	13069699	13070230
GMJENa0022G16	Chr01	13219177	13218629	13072274	13072970
GMJENa0020E10	Chr01	13275651	13275051	13072402	13072933
GMJENa0105C03	Chr01	13086719	13087443	13247931	13247510
GMJENa0127J09	Chr01	13093042	13093674	13270949	13270242
GMJENa0007C20	Chr01	13275849	13275212	13107816	13108461
GMJENa0002F16	Chr01	13293995	13293476	13109625	13110228
GMJENa0207O20	Chr01	13287403	13286870	13109634	13110164
GMJENa0081P21	Chr01	13298535	13298027	13109653	13110208
GMJENb0064D14	Chr01	13110411	13111020	13250394	13249808
GMJENb0044A23	Chr01	13115127	13115681	13219082	13218465
GMJENb0091J17	Chr01	13118214	13118937	13261772	13261084
GMJENb0106K16	Chr01	13137925	13138565	13230794	13230142
GMJENa0085B13	Chr01	13338687	13338021	13151094	13151739
GMJENa0059D07	Chr01	13153770	13154316	13352442	13351813
GMJENa0168H13	Chr01	13153770	13154208	13324280	13323759
GMJENa0172A05R1	Chr01	13153981	13154722	13298579	13297958
GMJENa0071L20	Chr01	13321699	13321196	13154127	13154638
GMJENa0123A13	Chr01	13280085	13279361	13159265	13159967
GMJENa0037H12	Chr01	13341538	13341065	13159291	13159754
GMJENa0187P20	Chr01	13337393	13336767	13178641	13179066
GMJENa0009K07	Chr01	13337265	13336610	13178815	13179236
GMJENb0051P21	Chr01	13308480	13307717	13183910	13184630
GMJENa0050D12	Chr01	13401558	13401031	13219261	13219819
GMJENa0065P15	Chr01	13269686	13269039	13219263	13219930
GMJENa0102K09	Chr01	13352484	13352024	13242463	13242930
GMJENa0127K08	Chr01	13426542	13425872	13259290	13259977
GMJENa0192N19	Chr01	13287443	13287902	13441231	13440744
GMJENb0062B04	Chr01	13436005	13435332	13295575	13296206
GMJENb0002H18	Chr01	13299429	13300125	13425656	13425156
GMJENa0138O10	Chr01	13462448	13461969	13303187	13303753
GMJENa0116G16	Chr01	13304667	13305225	13476023	13475475
GMJENb0057M01	Chr01	13397487	13396987	13306904	13307499
GMJENa0081O24	Chr01	13321707	13322373	13471357	13470754
GMJENa0133D13	Chr01	13341549	13342335	13489433	13488684
GMJENa0032E15	Chr01	13509699	13509133	13346501	13347114
GMJENa0008G10	Chr01	13347670	13348388	13511752	13511042
GMJENa0152A17	Chr01	13352679	13353295	13492956	13492394
GMJENa0027F08	Chr01	13361554	13362126	13532593	13531973
GMJENa0085J02	Chr01	13570649	13570176	13361565	13362162
GMJENa0092F24	Chr01	13374446	13375026	13526159	13525698
GMJENb0008K24	Chr01	13380048	13380685	13475561	13475031
GMJENa0077L15	Chr01	13383861	13384314	13526160	13525677
GMJENa0082L08	Chr01	13392455	13392959	13545949	13545348
GMJENa0107E01	Chr01	13392455	13393080	13545942	13545238
GMJENa0117M11	Chr01	13412660	13413333	13569806	13569137
GMJENa0116H21	Chr01	13413794	13414444	13582698	13582079
GMJENa0164C15	Chr01	13597391	13596819	13426598	13427150
GMJENa0156O08	Chr01	13598261	13597679	13427449	13428124
GMJENa0071F12	Chr01	13428144	13428684	13597373	13596799
GMJENa0080B07	Chr01	13601004	13600558	13433274	13433786
GMJENa0022N11	Chr01	13440723	13441310	13640281	13639657
GMJENa0085D22	Chr01	13440723	13441391	13604265	13603627
GMJENa0169G20	Chr01	13441261	13441805	13623567	13622978
GMJENa0119I07	Chr01	13450170	13450851	13600335	13599666
GMJENa0010I01	Chr01	13635453	13634908	13459575	13460239
GMJENa0081N03	Chr01	13633929	13633452	13462481	13463087
GMJENb0061H20	Chr01	13463705	13464292	13582740	13582079
GMJENa0161B19	Chr01	13469966	13470446	13639973	13639474
GMJENa0102N05	Chr01	13470144	13470804	13572419	13572011
GMJENa0125I01	Chr01	13470144	13470762	13640270	13639664
GMJENb0036B10	Chr01	13507798	13508529	13637987	13637260
GMJENa0165N14	Chr01	13509729	13510224	13697373	13696667
GMJENb0002I03	Chr01	13518829	13519487	13616019	13615325
GMJENa0084P18	Chr01	13527387	13528061	13690585	13689904
GMJENa0196D14	Chr01	13697149	13696772	13532849	13533453
GMJENa0099D07	Chr01	13584681	13585292	13635432	13634908
GMJENa0118F09	Chr01	13619426	13620007	13704003	13703564
GMJENa0055E03	Chr01	13885138	13884442	13727100	13727658
GMJENa0089G16	Chr01	13734975	13735642	13887919	13887309
GMJENa0057I09	Chr01	13895658	13894976	13746184	13746835
GMJENb0041C20	Chr01	13767295	13767998	13882969	13882261
GMJENb0076O23	Chr01	13902629	13902035	13788444	13788872
GMJENa0200F03	Chr01	13799888	13800468	13896302	13895837
GMJENb0044C09	Chr01	13802645	13803050	13909110	13908642
GMJENa0162O10	Chr01	13985054	13984445	13821596	13822078
GMJENb0022G11	Chr01	13934180	13933844	13823915	13824588
GMJENb0015K12	Chr01	13955296	13954669	13835890	13836553
GMJENa0085C15	Chr01	14005086	14004390	13844081	13844830
GMJENa0138B24	Chr01	14028434	14027788	13857693	13858420
GMJENa0202N07	Chr01	13991274	13990706	13857898	13858450
GMJENa0020H21	Chr01	13859170	13859656	14005040	14004628
GMJENa0172H12R1	Chr01	13859175	13859812	14028407	14027877
GMJENa0174P11	Chr01	13863312	13864005	14029010	14028435
GMJENa0103C13	Chr01	13880058	13880779	14028986	14028311
GMJENa0092N18	Chr01	14053383	14052738	13885414	13886201
GMJENa0085C22	Chr01	14044452	14043763	13888484	13889119
GMJENa0081L22	Chr01	14051648	14051146	13903377	13903978
GMJENb0101K03	Chr01	14025227	14024584	13928837	13929384
GMJENb0053B11	Chr01	14025196	14024450	13959205	13959772
GMJENa0123O03	Chr01	14151540	14150883	13984098	13984801
GMJENa0132O02	Chr01	13984910	13985548	14135613	14134957
GMJENb0054I23	Chr01	13985014	13985601	14090413	14089910
GMJENa0021H08	Chr01	14145332	14144820	13990262	13990905
GMJENa0071F02	Chr01	14004342	14004844	14181272	14180840
GMJENa0074O23	Chr01	14005099	14005725	14168029	14167419
GMJENa0039K23	Chr01	14189318	14188683	14005132	14005669
GMJENb0111F21	Chr01	14026378	14027097	14130147	14129439
GMJENa0191A06	Chr01	14030994	14031406	14188943	14188567
GMJENa0109B17	Chr01	14037589	14038277	14100699	14100037
GMJENa0029B24	Chr01	14044461	14045091	14191694	14190998
GMJENa0101O15	Chr01	14045429	14046153	14213228	14212830
GMJENa0094H01	Chr01	14225140	14224449	14047540	14048112
GMJENa0076K10	Chr01	14063642	14064018	14216763	14216437
GMJENa0121E21	Chr01	14068759	14069411	14243017	14242226
GMJENa0068O12	Chr01	14245074	14244701	14071314	14071968
GMJENa0075N22	Chr01	14086162	14086856	14260147	14259513
GMJENa0016E10	Chr01	14091803	14092402	14272676	14271975
GMJENa0114H13	Chr01	14245322	14244815	14093530	14094018
GMJENa0133G24	Chr01	14098839	14099220	14259510	14258724
GMJENa0094I14	Chr01	14099051	14099437	14263433	14262976
GMJENa0194B15	Chr01	14100911	14101286	14245261	14244872
GMJENa0010E05	Chr01	14101049	14101501	14269883	14269242
GMJENb0025B10	Chr01	14267001	14266387	14138324	14138945
GMJENa0064F12	Chr01	14316195	14315652	14151987	14152567
GMJENa0150P02	Chr01	14181310	14181980	14356168	14355559
GMJENa0020K18	Chr01	14350340	14349709	14189913	14190470
GMJENa0168J09	Chr01	14395116	14394552	14198625	14199113
GMJENa0058A20	Chr01	14376797	14376162	14204737	14205438
GMJENb0076C20	Chr01	14329272	14328612	14212398	14213045
GMJENa0181P15	Chr01	14222572	14223234	14400593	14400002
GMJENa0110K16	Chr01	14399679	14399015	14223061	14223696
GMJENa0172N07R1	Chr01	14394918	14394283	14223062	14223695
GMJENa0134F03	Chr01	14399604	14398881	14231465	14232124
GMJENa0094F24	Chr01	14404069	14403435	14249267	14249969
GMJENa0094D24	Chr01	14404069	14403400	14249282	14249993
GMJENb0054J20	Chr01	14371370	14370819	14252157	14252767
GMJENa0166B19	Chr01	14433869	14433262	14253816	14254390
GMJENa0193C19	Chr01	14272720	14273372	14376696	14376091
GMJENa0055I18	Chr01	14433869	14433184	14273054	14273688
GMJENa0088C12	Chr01	14469922	14469153	14283747	14284562
GMJENb0086A06	Chr01	14286183	14286811	14416554	14415979
GMJENb0025F01	Chr01	14290135	14290776	14418076	14417482
GMJENa0070O23	Chr01	14336129	14336759	14407968	14407301
GMJENa0142G22	Chr01	14350389	14350904	14509058	14508640
GMJENb0059C15	Chr01	14364303	14364661	14457468	14456788
GMJENa0178G16	Chr01	14520166	14519523	14373901	14374622
GMJENa0025D23	Chr01	14559573	14558975	14399293	14399942
GMJENa0198H01	Chr01	14407999	14408420	14563938	14563182
GMJENa0055C01	Chr01	14434465	14435120	14591416	14590765
GMJENb0030M16	Chr01	14442306	14442917	14560672	14560059
GMJENa0022F06	Chr01	14624828	14624328	14452918	14453525
GMJENa0111K08	Chr01	14600218	14599610	14455392	14456133
GMJENa0089C18	Chr01	14465369	14465989	14652044	14651606
GMJENb0033N16	Chr01	14591995	14591394	14472730	14473112
GMJENa0055M09	Chr01	14654040	14653390	14472916	14473557
GMJENa0202N03	Chr01	14620852	14620450	14472929	14473341
GMJENa0093A13	Chr01	14643214	14642536	14497764	14498353
GMJENa0120L24	Chr01	14503617	14504056	14600303	14599853
GMJENa0125F02	Chr01	14507631	14508227	14669691	14669020
GMJENb0071M20	Chr01	14617495	14616909	14511417	14512066
GMJENa0069J12	Chr01	14521768	14522193	14702573	14702033
GMJENa0181M06	Chr01	14521770	14522193	14700442	14699921
GMJENa0091I23	Chr01	14521773	14522193	14688088	14687565
GMJENb0031F23	Chr01	14638397	14637913	14535205	14535909
GMJENa0022C03	Chr01	14538022	14538673	14676394	14675774
GMJENa0041N01	Chr01	14668267	14667636	14542776	14543392
GMJENa0185I08	Chr01	14693649	14693144	14550109	14550613
GMJENa0046G21	Chr01	14559581	14559965	14749084	14748686
GMJENa0109M20	Chr01	14702593	14701911	14559620	14560303
GMJENa0006O23	Chr01	14737525	14737019	14561101	14561727
GMJENa0162D18	Chr01	14736377	14735741	14575363	14575772
GMJENa0160L11	Chr01	14771413	14770697	14578949	14579630
GMJENb0013A08	Chr01	14685484	14684843	14579807	14580309
GMJENb0006J02	Chr01	14675605	14674824	14588116	14588886
GMJENa0209A14	Chr01	14627068	14627634	14771338	14770674
GMJENa0112B19	Chr01	14643223	14643941	14711222	14710499
GMJENa0134M11	Chr01	14833234	14832614	14658481	14659101
GMJENa0132N23	Chr01	14672302	14672968	14834711	14834057
GMJENa0207L01	Chr01	14829965	14829452	14677462	14677875
GMJENb0049B22R1	Chr01	14698437	14699086	14801599	14800877
GMJENb0055M03	Chr01	14827635	14827062	14705213	14705784
GMJENa0128L13	Chr01	14725007	14725612	14895374	14894796
GMJENa0064G20	Chr01	14736254	14736908	14862808	14862320
GMJENa0168O06	Chr01	14900630	14900213	14736415	14736945
GMJENa0150F13	Chr01	14897955	14897358	14739804	14740240
GMJENa0031L22	Chr01	14740164	14740503	14900607	14900169
GMJENa0060I14	Chr01	14920924	14920288	14752842	14753577
GMJENa0194J01	Chr01	14802635	14803000	14924836	14924413
GMJENa0104J14	Chr01	15137663	15138323	15316206	15315532
GMJENa0122D07	Chr01	15137663	15138389	15316152	15315479
GMJENa0094J24	Chr01	15256078	15255417	15137687	15138323
GMJENa0174M23	Chr01	15302994	15302378	15138878	15139433
GMJENb0121I19	Chr01	15174931	15175565	15288775	15288126
GMJENb0086M24	Chr01	15174969	15175679	15288349	15287670
GMJENb0014H16R1	Chr01	15308875	15308241	15184456	15184998
GMJENa0076N23	Chr01	15187375	15187798	15395402	15394864
GMJENa0175B17	Chr01	15338157	15337427	15188404	15189079
GMJENa0174A17	Chr01	15355772	15355223	15201584	15202024
GMJENb0058I09	Chr01	15213005	15213689	15345362	15344724
GMJENa0020C01	Chr01	15218524	15219224	15396653	15396012
GMJENa0151B07	Chr01	15228070	15228608	15390949	15390424
GMJENa0005M02	Chr01	15420748	15420251	15228546	15229150
GMJENb0081K07	Chr01	15343191	15342650	15229366	15229998
GMJENa0192F21	Chr01	15414474	15414002	15233359	15233748
GMJENb0063J20	Chr01	15235756	15236151	15332785	15332304
GMJENa0114M10	Chr01	15408698	15408153	15245226	15245834
GMJENb0024E05	Chr01	15363347	15362715	15251404	15251824
GMJENa0156M02	Chr01	15432589	15431919	15255659	15256344
GMJENa0208C19	Chr01	15316242	15316874	15490775	15490052
GMJENa0066J10	Chr01	15484140	15483537	15316276	15316879
GMJENb0091G12	Chr01	15316823	15317381	15445075	15444529
GMJENa0148E05	Chr01	15444561	15444210	15319751	15320195
GMJENa0009F01	Chr01	15484889	15484374	15321287	15321700
GMJENb0007G08	Chr01	15433839	15433448	15330589	15331177
GMJENb0025P18	Chr01	15334092	15334667	15463398	15462830
GMJENa0025E01	Chr01	15336117	15336766	15521866	15521228
GMJENa0070J13	Chr01	15480102	15479510	15336139	15336728
GMJENa0150K18	Chr01	15336174	15336772	15484129	15483537
GMJENa0147O24	Chr01	15521922	15521448	15342768	15343252
GMJENb0023A19	Chr01	15344724	15345338	15461567	15460830
GMJENa0023A18	Chr01	15352251	15352852	15524967	15524302
GMJENa0101I14	Chr01	15544346	15543826	15366849	15367183
GMJENb0096F17	Chr01	15417892	15418407	15516130	15515501
GMJENa0119P23	Chr01	15601158	15600565	15433077	15433707
GMJENb0026A10	Chr01	15535847	15535060	15438566	15439319
GMJENa0120I05	Chr01	15439105	15439658	15586842	15586189
GMJENa0145A04	Chr01	15515068	15514552	15439112	15439677
GMJENa0034I04	Chr01	15596301	15595715	15444250	15444875
GMJENa0135F15	Chr01	15452518	15453211	15627075	15626397
GMJENb0066J18	Chr01	15463473	15464066	15568367	15567746
GMJENa0079F09	Chr01	15470505	15470962	15642000	15641466
GMJENa0164B10	Chr01	15480245	15480802	15656775	15656308
GMJENa0061O19	Chr01	15498803	15499263	15663099	15662523
GMJENb0017I12	Chr01	15500723	15501256	15656355	15655879
GMJENb0023L04	Chr01	15643126	15642542	15519495	15520083
GMJENb0014I18R1	Chr01	15522360	15522951	15619810	15619409
GMJENb0050D02	Chr01	15633544	15632979	15527307	15527923
GMJENa0193M01	Chr01	15723168	15722817	15564282	15564877
GMJENb0050M14	Chr01	15716391	15716016	15600427	15600880
GMJENa0076G23	Chr01	15601179	15601548	15729693	15729330
GMJENb0005C16	Chr01	15707937	15707463	15630162	15630749
GMJENb0009H04	Chr01	15659185	15659843	15767453	15766887
GMJENb0031D13	Chr01	15792782	15792100	15667932	15668735
GMJENb0131C23	Chr01	15680248	15680952	15792799	15792158
GMJENb0014D14R1	Chr01	15686288	15686881	15792226	15791861
GMJENb0008J17	Chr01	15797563	15797024	15687099	15687567
GMJENb0021J23	Chr01	15802586	15802033	15705231	15705663
GMJENb0055L07	Chr01	15705278	15705818	15777533	15777093
GMJENa0187M11	Chr01	15832118	15831416	15723573	15724257
GMJENa0069M24	Chr01	15848340	15847843	15729779	15730317
GMJENb0009H07	Chr01	15851233	15850767	15776195	15776651
GMJENb0013G21	Chr01	15791191	15791742	15964670	15964170
GMJENb0018C20	Chr01	15915292	15914737	15797026	15797650
GMJENa0130C10	Chr01	15804362	15805018	15966698	15965971
GMJENa0161D06	Chr01	15848154	15848752	15966885	15966329
GMJENa0064B18	Chr01	15852059	15852697	15966725	15966056
GMJENa0021B17	Chr01	16078918	16078259	15885735	15886412
GMJENa0054L04	Chr01	16078918	16078311	15892682	15893035
GMJENa0101P09	Chr01	15914216	15914937	15966697	15966010
GMJENb0046I08	Chr01	15933919	15934415	16160525	16160073
GMJENa0091J03	Chr01	16160603	16160042	15966662	15967304
GMJENb0051E21	Chr01	16129965	16129280	16002026	16002504
GMJENa0089H01	Chr01	16339159	16339606	16511988	16511651
GMJENa0092A06	Chr01	16516832	16516183	16339174	16339778
GMJENa0066A10	Chr01	16526206	16525636	16341835	16342476
GMJENb0066F17	Chr01	16457883	16457478	16341948	16342290
GMJENb0024L05	Chr01	16377560	16378132	16443679	16443347
GMJENa0120G14	Chr01	16379803	16380329	16549617	16548893
GMJENa0182P12	Chr01	16557967	16557413	16394368	16394995
GMJENa0051C03	Chr01	16400026	16400568	16549174	16548616
GMJENb0081P10	Chr01	16400887	16401409	16500700	16500192
GMJENa0134O05	Chr01	16586379	16585792	16418260	16418806
GMJENa0085L09	Chr01	16621458	16620861	16418749	16419384
GMJENa0086P20	Chr01	16606432	16606035	16418749	16419179
GMJENa0052F09	Chr01	16606432	16605952	16418753	16419321
GMJENa0044K18	Chr01	16424908	16424349	16719529	16720093
GMJENa0040M01	Chr01	16459467	16460116	16552463	16551929
GMJENb0012P23	Chr01	16558477	16557927	16464631	16465333
GMJENa0082L03	Chr01	16470654	16471067	16666814	16666255
GMJENa0168B13	Chr01	16493170	16493571	16662347	16661865
GMJENa0095K20	Chr01	16655021	16654472	16503691	16504291
GMJENa0066I20	Chr01	16671358	16670978	16522417	16522896
GMJENa0131C06	Chr01	16719367	16718726	16526237	16527007
GMJENb0027H12	Chr01	16535101	16535528	16589899	16589278
GMJENb0076C16	Chr01	16541205	16541832	16671896	16671222
GMJENa0091O13	Chr01	16722059	16721477	16552508	16553144
GMJENa0044C24	Chr01	16552792	16553402	16713623	16712997
GMJENb0101H23	Chr01	16569204	16569892	16671896	16671160
GMJENa0082N03	Chr01	16759417	16758898	16586420	16587118
GMJENb0116D19	Chr01	16589855	16590515	16716033	16715314
GMJENa0131K11	Chr01	16767407	16766792	16592165	16592946
GMJENa0049M02	Chr01	16614121	16614677	16793264	16792726
GMJENa0161A02	Chr01	16619110	16619664	16782947	16782292
GMJENa0042J05	Chr01	16783831	16783245	16619133	16619559
GMJENa0206D17	Chr01	16684562	16684178	16621509	16622034
GMJENb0029F17	Chr01	16770319	16769803	16628279	16628878
GMJENa0071L07	Chr01	16819793	16819265	16645065	16645573
GMJENb0061C06	Chr01	16776022	16775303	16653079	16653882
GMJENb0065O19	Chr01	16656202	16656884	16774003	16773412
GMJENa0142A21	Chr01	16837314	16836812	16661946	16662437
GMJENa0049E13	Chr01	16666856	16667244	16850588	16850152
GMJENa0162L15	Chr01	16870948	16870507	16666894	16667495
GMJENa0015E09	Chr01	16801522	16801118	16678910	16679307
GMJENb0060M09	Chr01	16805580	16804973	16685155	16685700
GMJENa0128L15	Chr01	16903132	16902629	16694367	16694971
GMJENa0207D15	Chr01	16700440	16701041	16849966	16849343
GMJENa0180N03	Chr01	16844087	16843474	16700478	16701175
GMJENb0036K13	Chr01	16701203	16701898	16816331	16815711
GMJENb0017D13	Chr01	16822453	16821877	16704936	16705474
GMJENa0140P03	Chr01	16892790	16892073	16709779	16710529
GMJENa0046C21	Chr01	16886575	16886014	16720072	16720625
GMJENa0071P14	Chr01	16931965	16931359	16746941	16747544
GMJENa0143B10	Chr01	16752970	16753497	16921116	16920523
GMJENb0008L17	Chr01	16890138	16889555	16776541	16777126
GMJENa0134A09	Chr01	16903117	16902629	16783857	16784489
GMJENa0004E19	Chr01	16793293	16793934	16989180	16988593
GMJENb0001M12	Chr01	16876415	16875639	16799337	16799843
GMJENb0006F12	Chr01	16906262	16905518	16801658	16802419
GMJENa0057D12	Chr01	16990680	16990007	16812277	16812829
GMJENa0063F08	Chr01	16813444	16814047	16986500	16986022
GMJENa0004G17	Chr01	16986749	16986119	16819836	16820515
GMJENa0177I22	Chr01	16990428	16990027	16823136	16823812
GMJENb0056H01	Chr01	16954865	16954359	16833454	16833873
GMJENb0055L13	Chr01	16962799	16962135	16838102	16838614
GMJENa0180J04	Chr01	16862019	16862603	17010702	17010142
GMJENb0048J03	Chr01	17007621	17007241	16864487	16864931
GMJENa0115H03	Chr01	17062881	17062164	16871013	16871733
GMJENb0111I21	Chr01	16992050	16991295	16876171	16876761
GMJENa0059P14	Chr01	17105280	17104631	16913746	16914135
GMJENa0129J04	Chr01	17097722	17097055	16921174	16921837
GMJENb0012A22	Chr01	16938579	16939220	17056524	17055833
GMJENa0078K10	Chr01	16947644	16948252	17118839	17118289
GMJENa0019G19	Chr01	16955277	16955805	17142938	17142555
GMJENb0060P07	Chr01	16956974	16957599	17105180	17104714
GMJENb0044N03	Chr01	16959818	16960221	17065147	17064669
GMJENa0190D03	Chr01	17145957	17145183	16982058	16982825
GMJENa0190D09	Chr01	17145934	17145215	16982129	16982623
GMJENa0091O04	Chr01	16986552	16987190	17184295	17183709
GMJENa0036K10	Chr01	17151835	17151290	16986786	16987391
GMJENa0202A17	Chr01	16987086	16987621	17153030	17152547
GMJENa0101O17	Chr01	16989223	16989877	17145925	17145374
GMJENa0139O10	Chr01	17159998	17159296	16996998	16997580
GMJENb0065I21	Chr01	17069233	17068689	17010819	17011368
GMJENa0134N13	Chr01	17198375	17197979	17039430	17040023
GMJENa0039C22	Chr01	17198294	17197645	17040095	17040735
GMJENa0078L08	Chr01	17050509	17051170	17218507	17217867
GMJENb0046P20	Chr01	17057552	17058018	17199164	17198654
GMJENa0120E11	Chr01	17208639	17208190	17062605	17063284
GMJENa0134P04	Chr01	17062895	17063601	17244009	17243340
GMJENb0014O18R1	Chr01	17208520	17207911	17088611	17089008
GMJENb0044L20	Chr01	17115822	17116289	17241840	17241305
GMJENa0093G10	Chr01	17117203	17117841	17292529	17291901
GMJENa0162K24	Chr01	17297139	17296649	17117236	17117685
GMJENa0164C20	Chr01	17292638	17292029	17129066	17129677
GMJENa0002J04	Chr01	17292638	17292021	17129523	17130128
GMJENb0131B12	Chr01	17131461	17132146	17283121	17282381
GMJENa0133P22	Chr01	17132946	17133642	17301166	17300435
GMJENa0022J16	Chr01	17301673	17301045	17160325	17160741
GMJENb0066C08	Chr01	17310061	17309644	17183837	17184269
GMJENb0081K15	Chr01	17193850	17194555	17291476	17290838
GMJENa0089E22	Chr01	17198303	17198760	17373134	17372754
GMJENa0116I21	Chr01	17357823	17357146	17198804	17199445
GMJENb0034F15	Chr01	17303427	17302922	17202030	17202557
GMJENa0164G18	Chr01	17218232	17218836	17399969	17399411
GMJENa0072A09	Chr01	17235439	17236094	17390103	17389465
GMJENa0124L08	Chr01	17241637	17242329	17433742	17433083
GMJENa0066B16	Chr01	17244033	17244660	17401785	17401312
GMJENa0181P22	Chr01	17439727	17439033	17252072	17252563
GMJENa0120N02	Chr01	17270387	17270954	17399513	17398846
GMJENb0002J15	Chr01	17378461	17378021	17276715	17277383
GMJENb0002L15	Chr01	17378461	17377852	17276724	17277385
GMJENa0176B23	Chr01	17464514	17463889	17286561	17287124
GMJENa0179D16	Chr01	17440534	17439806	17301231	17301903
GMJENa0089P02	Chr01	17304447	17305200	17471492	17470916
GMJENa0177I20	Chr01	17309154	17309537	17399798	17399124
GMJENb0058J22	Chr01	17429761	17429120	17319530	17320100
GMJENb0040G07	Chr01	17457219	17456611	17333747	17334327
GMJENa0132H20	Chr01	17499406	17498634	17344634	17345294
GMJENa0062H23	Chr01	17464694	17464091	17344644	17345255
GMJENa0112O07	Chr01	17351967	17352666	17527601	17526932
GMJENa0179A20	Chr01	17352098	17352726	17528584	17527917
GMJENb0131J07	Chr01	17354447	17354968	17462208	17461651
GMJENa0183F13	Chr01	17575244	17574629	17412528	17413216
GMJENa0202G04	Chr01	17428807	17429335	17584769	17584251
GMJENa0140D07	Chr01	17573721	17572948	17435255	17436054
GMJENa0059O15	Chr01	17604708	17604369	17436125	17436623
GMJENb0023G14	Chr01	17437093	17437686	17496179	17495687
GMJENa0101D07	Chr01	17440805	17441405	17607381	17606778
GMJENa0081M15	Chr01	17499184	17498541	17445903	17446566
GMJENa0115P12	Chr01	17615063	17614481	17445923	17446495
GMJENa0127D06	Chr01	17607747	17607363	17462499	17462891
GMJENa0096J22	Chr01	17465793	17466413	17615863	17615284
GMJENa0100J12	Chr01	17469235	17469677	17660030	17659498
GMJENb0001O02	Chr01	17604972	17604289	17501110	17501792
GMJENb0121H12	Chr01	17505809	17506567	17556238	17555469
GMJENb0041M06	Chr01	17576177	17575597	17509732	17510399
GMJENa0185N02	Chr01	17531003	17531453	17673642	17673180
GMJENb0076H11	Chr01	17545982	17546565	17652938	17652262
GMJENb0024O02	Chr01	17571047	17571577	17693599	17692990
GMJENa0172B12R1	Chr01	17739837	17739227	17573493	17574085
GMJENa0110A06	Chr01	17758852	17758237	17573503	17574176
GMJENa0071H13	Chr01	17742044	17741567	17573504	17574038
GMJENb0017B14	Chr01	17601887	17602498	17735548	17734903
GMJENa0172B07R1	Chr01	17603742	17604316	17744163	17743536
GMJENa0022P19	Chr01	17782519	17782108	17605813	17606448
GMJENa0163H24	Chr01	17620817	17621186	17802318	17801643
GMJENb0021H06	Chr01	17748913	17748415	17623618	17623979
GMJENa0159B11	Chr01	17814770	17814388	17641474	17641900
GMJENb0039G10	Chr01	17761852	17761403	17642068	17642667
GMJENb0005H01	Chr01	17642071	17642421	17736953	17736437
GMJENa0078N17	Chr01	17809219	17808631	17643367	17643973
GMJENa0042D09	Chr01	17845956	17845384	17655161	17655719
GMJENa0103A19	Chr01	17823724	17823029	17655590	17656325
GMJENa0125K13	Chr01	17823554	17824184	17655613	17656250
GMJENa0101A01	Chr01	17845956	17845278	17655614	17656258
GMJENa0193O19	Chr01	17660092	17660695	17760627	17759967
GMJENa0132I03	Chr01	17847716	17847111	17673713	17674426
GMJENa0067E08	Chr01	17685106	17685634	17845458	17844876
GMJENa0049D01	Chr01	17685289	17685893	17871553	17870973
GMJENb0005A13	Chr01	17807357	17806881	17687331	17687938
GMJENa0052H17	Chr01	17708880	17709424	17889589	17888989
GMJENa0050K08	Chr01	17889700	17889111	17727497	17727899
GMJENa0207P09	Chr01	17760744	17761306	17934319	17933941
GMJENa0180C20	Chr01	17781436	17782078	17961937	17961310
GMJENb0005H03	Chr01	17787403	17788013	17864168	17863668
GMJENa0093E18	Chr01	17965901	17965207	17792859	17793539
GMJENa0057I08	Chr01	17815031	17815652	18013162	18012573
GMJENa0051I04	Chr01	17999988	17999505	17823281	17823783
GMJENa0021A07	Chr01	17998278	17997676	17823372	17823962
GMJENa0036O12	Chr01	18012255	18011679	17823597	17824202
GMJENa0101L10	Chr01	17823742	17824222	18010837	18010362
GMJENa0034M01	Chr01	17826134	17826770	17994259	17993640
GMJENa0132H03	Chr01	17831430	17832116	17994583	17993827
GMJENa0144F06	Chr01	17831430	17832073	18012164	18011635
GMJENa0031I23	Chr01	18019864	18019524	17831451	17832021
GMJENa0208E06	Chr01	17994276	17993617	17834428	17835072
GMJENb0017E12	Chr01	17951237	17950740	17836054	17836579
GMJENa0152E02	Chr01	18052176	18051523	17845911	17846621
GMJENa0167K08	Chr01	17847906	17848505	18047550	18047203
GMJENa0133D03	Chr01	18028423	18027640	17848712	17849391
GMJENa0069K19	Chr01	18013737	18013400	17854077	17854548
GMJENb0044M01	Chr01	17980907	17980461	17864186	17864573
GMJENb0067E08	Chr01	17868674	17869102	18007390	18006970
GMJENa0203A08	Chr01	18051846	18051282	17871285	17871714
GMJENa0047I21	Chr01	18079008	18078551	17885711	17886083
GMJENa0057F05	Chr01	17888211	17888875	18056860	18056267
GMJENb0006D16	Chr01	17913601	17914368	18029002	18028189
GMJENa0209J09	Chr01	18074125	18073685	17915178	17915754
GMJENb0106F03	Chr01	18023927	18023222	17926168	17926799
GMJENa0061B02	Chr01	17928163	17928795	18093549	18092881
GMJENa0148L03	Chr01	18101052	18100512	17928194	17928810
GMJENa0032E24	Chr01	18052034	18051569	17932405	17932877
GMJENa0147O14	Chr01	18098857	18098318	17933062	17933579
GMJENb0059G02	Chr01	18052692	18052088	17950427	17950942
GMJENa0040B18	Chr01	17959109	17959702	18098371	18097741
GMJENa0083K17	Chr01	17965923	17966317	18136913	18136275
GMJENb0060B03	Chr01	18109885	18109215	17998077	17998728
GMJENb0017J06	Chr01	18009778	18010335	18113398	18112883
GMJENa0072L07	Chr01	18013198	18013631	18170268	18169916
GMJENa0037J21	Chr01	18177397	18177024	18013222	18013595
GMJENb0121P06	Chr01	18135653	18135035	18031622	18032217
GMJENa0088A17	Chr01	18210607	18210125	18047650	18048221
GMJENa0100M17	Chr01	18204915	18204586	18052081	18052587
GMJENb0054N01	Chr01	18074295	18074972	18194301	18193588
GMJENb0023E01	Chr01	18079507	18080193	18197545	18196850
GMJENa0015B08	Chr01	18246080	18245570	18080944	18081552
GMJENa0159E18	Chr01	18254165	18253467	18093070	18093693
GMJENa0182G17	Chr01	18233824	18233292	18098688	18099183
GMJENa0023P01	Chr01	18231167	18230536	18098967	18099649
GMJENa0091M13	Chr01	18289224	18288601	18099515	18100130
GMJENa0190I02	Chr01	18286094	18285488	18117563	18118213
GMJENa0083C18	Chr01	18123832	18124277	18261235	18260675
GMJENb0067M21	Chr01	18126319	18126749	18240512	18240155
GMJENa0118J10	Chr01	18306988	18306549	18139901	18140464
GMJENa0032J08	Chr01	18166459	18166856	18330170	18329563
GMJENa0095B06	Chr01	18189054	18189760	18363640	18363016
GMJENa0205N16	Chr01	18189309	18189681	18330170	18329577
GMJENa0020L01	Chr01	18191799	18192273	18389640	18389217
GMJENa0157A23	Chr01	18214336	18214850	18378069	18377549
GMJENb0064A21	Chr01	18233497	18234147	18377614	18376998
GMJENa0142F23	Chr01	18432767	18432350	18239186	18239679
GMJENa0069P21	Chr01	18242975	18243512	18429274	18428716
GMJENa0032M13	Chr01	18243188	18243513	18432689	18432124
GMJENa0064H05	Chr01	18254176	18254802	18438249	18437906
GMJENa0121I13	Chr01	18437894	18437363	18254193	18254810
GMJENa0006G13	Chr01	18254233	18254791	18439273	18438579
GMJENa0108C17	Chr01	18432767	18432124	18255777	18256469
GMJENa0209P11	Chr01	18437894	18437277	18277770	18278386
GMJENa0051L14	Chr01	18439091	18438553	18282148	18282740
GMJENa0077M07	Chr01	18286104	18286604	18453898	18453293
GMJENa0077N06	Chr01	18286104	18286611	18453899	18453335
GMJENa0136F15	Chr01	18451309	18450579	18286117	18286902
GMJENa0132N02	Chr01	18296883	18297532	18460564	18459847
GMJENa0066J19	Chr01	18463686	18463274	18296924	18297505
GMJENa0177H11	Chr01	18457652	18457090	18308073	18308783
GMJENa0072D21	Chr01	18309358	18309954	18457736	18457174
GMJENb0029J05	Chr01	18445465	18444952	18312001	18312551
GMJENb0034H10	Chr01	18313914	18314406	18441034	18440608
GMJENa0144D01	Chr01	18466938	18466361	18363696	18364270
GMJENa0077N07	Chr01	18374927	18375356	18451261	18450728
GMJENb0054C06	Chr01	18502013	18501380	18377660	18378360
GMJENb0014N10R1	Chr01	18393600	18394231	18485474	18484899
GMJENb0016B09	Chr01	18404553	18405268	18491652	18490898
GMJENa0128B17	Chr01	18411464	18412127	18576702	18576144
GMJENb0055L18	Chr01	18506965	18506346	18422495	18422975
GMJENa0129L15	Chr01	18427168	18427829	18604383	18603664
GMJENb0106B03	Chr01	18427649	18428314	18573962	18573277
GMJENa0128H03	Chr01	18604499	18603781	18438130	18438907
GMJENa0128J18	Chr01	18649708	18648991	18438585	18439199
GMJENa0110A20	Chr01	18631483	18630791	18452110	18452690
GMJENa0038B08	Chr01	18637445	18636842	18453058	18453530
GMJENa0107K04	Chr01	18460411	18460964	18613088	18612526
GMJENa0156I18	Chr01	18466976	18467583	18534822	18534170
GMJENa0188G10	Chr01	18604160	18603748	18467096	18467539
GMJENa0072M18	Chr01	18631483	18630985	18469336	18469795
GMJENa0044K21	Chr01	18613108	18612653	18469376	18469792
GMJENa0089J21	Chr01	18659341	18658705	18486278	18486952
GMJENa0129A09	Chr01	18604414	18603748	18489172	18489908
GMJENa0206N03	Chr01	18631483	18630985	18489176	18489777
GMJENa0080B03	Chr01	18489857	18490455	18645786	18645194
GMJENa0174J16	Chr01	18491257	18491949	18631465	18630777
GMJENa0138D02	Chr01	18683219	18682716	18509597	18510133
GMJENa0076F10	Chr01	18513961	18514448	18685512	18684927
GMJENa0206B15	Chr01	18680270	18679820	18519822	18520364
GMJENa0080O20	Chr01	18537662	18538283	18701705	18701193
GMJENb0027N15	Chr01	18678216	18677787	18538734	18539391
GMJENa0104B11	Chr01	18556194	18556900	18725139	18724502
GMJENa0131L22	Chr01	18725176	18724437	18556213	18556943
GMJENa0062D01	Chr01	18725176	18724537	18565723	18566262
GMJENb0001L12	Chr01	18569268	18569942	18692656	18691991
GMJENa0192P05	Chr01	18735276	18734836	18574396	18574784
GMJENa0169L15	Chr01	18576712	18577413	18736910	18736197
GMJENb0015P19	Chr01	18683301	18682733	18580517	18581088
GMJENb0004L21	Chr01	18584202	18584649	18655160	18654624
GMJENa0059C19	Chr01	18592631	18593178	18725643	18724991
GMJENb0018L07	Chr01	18594214	18594739	18705703	18704967
GMJENa0206N06	Chr01	18762988	18762526	18595476	18596054
GMJENb0046B04	Chr01	18619093	18619779	18749288	18748687
GMJENa0070J19	Chr01	18808627	18808118	18633351	18633861
GMJENa0074O15	Chr01	18822194	18821846	18642883	18643521
GMJENa0186H01	Chr01	18645030	18645634	18808587	18808010
GMJENb0057E11	Chr01	18743187	18742517	18653836	18654497
GMJENb0062C24	Chr01	18771407	18770813	18655175	18655717
GMJENa0058G17	Chr01	18658066	18658650	18834272	18833922
GMJENb0003P07	Chr01	18793189	18792548	18669709	18670424
GMJENb0004M24	Chr01	18683080	18683591	18782000	18781405
GMJENa0155E05	Chr01	18686785	18687470	18853094	18852387
GMJENa0004N16	Chr01	18695834	18696407	18885634	18884981
GMJENa0021N20	Chr01	18698571	18699170	18881934	18881309
GMJENa0155K20	Chr01	18700224	18700763	18845950	18845360
GMJENa0122H15	Chr01	18880472	18879829	18701620	18702281
GMJENb0062N07	Chr01	18708266	18708808	18850691	18850068
GMJENa0063C05	Chr01	18834303	18833780	18710366	18710945
GMJENb0013O02	Chr01	18710476	18711035	18815538	18814976
GMJENa0108F02	Chr01	18736963	18737656	18927020	18926312
GMJENa0066N07	Chr01	18736964	18737484	18942441	18941983
GMJENa0096B10	Chr01	18866423	18865799	18737003	18737678
GMJENa0152L17	Chr01	18748253	18748965	18937513	18936815
GMJENa0002D13	Chr01	18925216	18924634	18748266	18748802
GMJENb0041P13	Chr01	18762254	18762908	18881957	18881311
GMJENa0056A15	Chr01	18766893	18767535	18923008	18922299
GMJENa0142M07	Chr01	19006541	19006046	18788841	18789253
GMJENa0163H04	Chr01	18827040	18827673	18996739	18996154
GMJENb0020P01	Chr01	18945484	18944789	18875715	18876366
GMJENb0064F04	Chr01	19014788	19014182	18884194	18884788
GMJENa0177G15	Chr01	18894851	18895331	19053384	19052691
GMJENa0055P16	Chr01	18895014	18895666	19084369	19083758
GMJENa0061P07	Chr01	19090728	19090099	18900847	18901441
GMJENa0089J24	Chr01	18900847	18901476	18996739	18996369
GMJENa0066B15	Chr01	19097550	19096950	18925382	18925983
GMJENa0056F11	Chr01	18926429	18927033	19097259	19096891
GMJENa0031D12	Chr01	18926519	18926936	19100152	19099488
GMJENa0138H22	Chr01	19100364	19099653	18926907	18927569
GMJENa0169H07	Chr01	18927256	18927916	19100359	19099655
GMJENa0193H16	Chr01	18946225	18946725	19000009	18999385
GMJENa0161E19	Chr01	19100335	19099867	18947568	18948272
GMJENa0033C11	Chr01	19097550	19096948	18950264	18950851
GMJENa0175N19	Chr01	19073491	19072815	18950299	18950906
GMJENa0089M09	Chr01	19085649	19084940	18954026	18954697
GMJENa0007H07	Chr01	18968652	18969220	19136246	19135552
GMJENa0200L18	Chr01	18982570	18983136	19136247	19135605
GMJENa0095B08	Chr01	18995440	18996007	19185209	19184598
GMJENa0094F04	Chr01	19176392	19175608	18996807	18997390
GMJENa0075D07	Chr01	19021229	19021840	19185209	19184597
GMJENa0097J09	Chr01	19230657	19229953	19049861	19050534
GMJENa0042G04	Chr01	19050021	19050535	19222789	19222314
GMJENa0136D14	Chr01	19053408	19053881	19225098	19224356
GMJENa0064K13	Chr01	19230657	19230243	19053429	19053784
GMJENa0152B10	Chr01	19230603	19230238	19062062	19062618
GMJENb0091B08	Chr01	19065761	19066394	19160529	19159972
GMJENa0113F09	Chr01	19072881	19073572	19277437	19276753
GMJENa0158P16	Chr01	19230477	19229996	19072909	19073543
GMJENa0022A02	Chr01	19259983	19259550	19073289	19073952
GMJENa0166A17	Chr01	19090245	19090774	19184429	19184057
GMJENb0007A19	Chr01	19216218	19215729	19110096	19110612
GMJENa0036G16	Chr01	19277679	19277233	19118147	19118649
GMJENb0111C23	Chr01	19118888	19119642	19255452	19254781
GMJENa0165E24	Chr01	19123974	19124332	19297761	19297354
GMJENa0148E10	Chr01	19292805	19292375	19124026	19124680
GMJENa0138L04	Chr01	19126297	19126860	19277850	19277232
GMJENa0036I04	Chr01	19130226	19130755	19293039	19292559
GMJENa0093F15	Chr01	19130226	19130836	19307710	19307090
GMJENa0060D17	Chr01	19307731	19307121	19133729	19134365
GMJENa0044D04	Chr01	19292234	19291627	19136752	19137331
GMJENb0066J24	Chr01	19243813	19243209	19145069	19145677
GMJENa0126I03	Chr01	19313091	19312410	19167286	19167943
GMJENa0084E12	Chr01	19168948	19169715	19351591	19350940
GMJENa0151F24	Chr01	19168948	19169421	19350239	19349791
GMJENa0183L13	Chr01	19351614	19350979	19168964	19169641
GMJENa0101B15	Chr01	19379132	19378348	19185289	19185933
GMJENa0181M23	Chr01	19374193	19373657	19185318	19185834
GMJENa0207H12	Chr01	19191325	19191963	19352036	19351476
GMJENa0020L20	Chr01	19212141	19212764	19405541	19404898
GMJENb0048I06	Chr01	19225668	19226028	19350346	19349915
GMJENa0024B04	Chr01	19229620	19230274	19421204	19420579
GMJENa0100P11	Chr01	19459361	19458944	19230341	19230763
GMJENa0203B09	Chr01	19405334	19404912	19240344	19240704
GMJENa0208H04	Chr01	19240912	19241468	19385793	19385163
GMJENa0129N01	Chr01	19424239	19423557	19243117	19243738
GMJENb0002M20	Chr01	19253263	19253860	19358480	19357876
GMJENa0195K02	Chr01	19430241	19429795	19277735	19278160
GMJENa0051I20	Chr01	19463333	19462744	19277902	19278474
GMJENa0166N13	Chr01	19278093	19278753	19447753	19447224
GMJENa0140L19	Chr01	19453776	19453045	19278198	19278952
GMJENa0168A20	Chr01	19282335	19282864	19373961	19373385
GMJENa0007K07	Chr01	19460820	19460253	19282624	19283019
GMJENb0031G21	Chr01	19302280	19302631	19415902	19415576
GMJENa0088O09	Chr01	19342954	19343616	19504908	19504204
GMJENa0026M16	Chr01	19351802	19352169	19530929	19530277
GMJENa0096P06	Chr01	19533232	19532534	19355512	19355980
GMJENb0067O05	Chr01	19479975	19479571	19367920	19368354
GMJENa0186C04	Chr01	19369449	19369912	19520233	19519631
GMJENa0112D17	Chr01	19538885	19538225	19374222	19374930
GMJENb0026J09	Chr01	19474581	19473895	19374356	19374994
GMJENa0079L03	Chr01	19536497	19536143	19385433	19385975
GMJENa0105M09	Chr01	19385842	19386360	19570499	19570160
GMJENb0056P04	Chr01	19504699	19504137	19401660	19402372
GMJENa0200D17	Chr01	19467930	19468385	19636811	19636252
GMJENb0050O03	Chr01	19570452	19569902	19468765	19469123
GMJENa0166L04	Chr01	19477423	19478055	19645090	19644616
GMJENa0080F02	Chr01	19614996	19614661	19477462	19477851
GMJENa0206N02	Chr01	19655621	19654984	19477465	19478135
GMJENa0200H15	Chr01	19648388	19647821	19477482	19478039
GMJENa0140G13	Chr01	19497650	19498308	19651564	19651027
GMJENa0105G03	Chr01	19500747	19501125	19675762	19675412
GMJENa0127D12	Chr01	19667166	19666496	19500768	19501531
GMJENa0108L13	Chr01	19524562	19525122	19683555	19683046
GMJENa0080N19	Chr01	19682615	19681991	19525586	19526232
GMJENa0147L15	Chr01	19530972	19531340	19713619	19713299
GMJENa0155N03	Chr01	19530972	19531488	19722663	19722235
GMJENa0033P02	Chr01	19722364	19721721	19532968	19533535
GMJENa0195P15	Chr01	19533241	19533728	19709830	19709379
GMJENa0093K21	Chr01	19713904	19713307	19536616	19537049
GMJENa0042O23	Chr01	19728591	19728189	19545055	19545509
GMJENa0044H02	Chr01	19722498	19722104	19552509	19553065
GMJENa0117K23	Chr01	19723147	19722487	19558885	19559444
GMJENa0083K08	Chr01	19651597	19651134	19574210	19574902
GMJENa0171C16	Chr01	19753934	19753339	19600655	19601091
GMJENb0019A23	Chr01	19694337	19693780	19609251	19609750
GMJENa0122G15	Chr01	19611151	19611762	19762649	19761891
GMJENa0194O09	Chr01	19764515	19764006	19611391	19611916
GMJENa0069G12	Chr01	19615189	19615681	19791894	19791414
GMJENb0044C17	Chr01	19621548	19622087	19718898	19718374
GMJENb0106C20	Chr01	19638870	19639499	19754447	19753761
GMJENa0201D10	Chr01	19645206	19645792	19808568	19807906
GMJENa0043L09	Chr01	19647802	19648149	19812213	19811792
GMJENa0148K14	Chr01	19820883	19820339	19651899	19652253
GMJENa0182O01	Chr01	19662505	19662919	19812222	19811857
GMJENa0076N21	Chr01	19837334	19836741	19662519	19663158
GMJENa0190G21	Chr01	19682718	19683221	19862544	19862168
GMJENa0114O12	Chr01	19849869	19849299	19683088	19683702
GMJENb0034E09	Chr01	19711300	19711903	19834291	19833755
GMJENa0086I24	Chr01	19713704	19714423	19847669	19847139
GMJENa0087G17	Chr01	19879937	19879468	19718223	19719000
GMJENb0121A19	Chr01	19720499	19721134	19916351	19915660
GMJENa0133L11	Chr01	19791836	19791317	19722570	19723302
GMJENa0103D07	Chr01	19753945	19754618	19929711	19929037
GMJENb0046M21	Chr01	19845575	19844930	19754482	19755121
GMJENa0044E24	Chr01	19952487	19952095	19791494	19791929
GMJENb0106N07	Chr01	19921858	19921289	19813106	19813607
GMJENa0090J22	Chr01	19980917	19980205	19813860	19814420
GMJENa0045O13	Chr01	19999187	19998543	19820963	19821473
GMJENa0181M05	Chr01	19839507	19840114	19997609	19997128
GMJENb0065K18	Chr01	19847892	19848508	19970162	19969618
GMJENa0074M23	Chr01	19848045	19848547	20014261	20013656
GMJENa0082H18	Chr01	19851440	19851927	20002438	20002070
GMJENa0147F07	Chr01	19851440	19851926	19969605	19968939
GMJENa0125E01	Chr01	20014288	20013707	19862247	19862866
GMJENa0138P08	Chr01	19862642	19863207	20010755	20010234
GMJENa0065B01	Chr01	19879950	19880557	20034333	20033719
GMJENa0052L22	Chr01	20023405	20022825	19899765	19900407
GMJENa0156M23	Chr01	19980618	19979937	19926376	19927095
GMJENb0005C14	Chr01	19927040	19927639	20044379	20043800
GMJENa0002J18	Chr01	19952214	19952744	20153068	20152554
GMJENa0081E23	Chr01	20127178	20126570	19952511	19953061
GMJENa0007C14	Chr01	20005304	20005908	20213785	20213221
GMJENa0032K09	Chr01	20015046	20015426	20209652	20209061
GMJENa0049K04	Chr01	20240658	20240302	20034395	20034790
GMJENa0094I11	Chr01	20038919	20039458	20214312	20213647
GMJENb0011I13	Chr01	20142631	20141846	20045070	20045707
GMJENb0011K13	Chr01	20142631	20141974	20045076	20045650
GMJENa0023E18	Chr01	20232391	20231751	20058664	20059284
GMJENa0185L05	Chr01	20068299	20068708	20219105	20218621
GMJENa0001M07	Chr01	20193041	20192396	20076188	20076782
GMJENa0051A21	Chr01	20091460	20092056	20280294	20279754
GMJENa0147A16	Chr01	20127191	20127670	20285849	20285447
GMJENa0008H14	Chr01	20330579	20330235	20127223	20127899
GMJENb0064E16	Chr01	20240835	20240206	20131715	20132357
GMJENa0133H14	Chr01	20151481	20152221	20343149	20342421
GMJENa0137N18	Chr01	20228805	20228149	20151514	20152250
GMJENa0082N14	Chr01	20309805	20309187	20153397	20154009
GMJENa0174I06	Chr01	20156172	20156526	20315293	20314617
GMJENa0156N01	Chr01	20353045	20352351	20162063	20162728
GMJENa0163F21	Chr01	20285895	20285262	20167110	20167699
GMJENa0087E01	Chr01	20167346	20168009	20333266	20332791
GMJENa0033G17	Chr01	20174278	20174888	20358814	20358187
GMJENb0041B01	Chr01	20286426	20285744	20206398	20207188
GMJENa0064G21	Chr01	20386424	20385939	20208773	20209267
GMJENa0098K03	Chr01	20392832	20392166	20214255	20214878
GMJENa0139J10	Chr01	20219012	20219640	20390063	20389421
GMJENa0153F04	Chr01	20224619	20225268	20400550	20399870
GMJENa0141A06	Chr01	20428245	20427564	20234266	20234741
GMJENa0095A02	Chr01	20261593	20262102	20417146	20416478
GMJENb0015B21	Chr01	20277935	20278421	20358006	20357272
GMJENa0077M03	Chr01	20295608	20296068	20483300	20482745
GMJENa0138I21	Chr01	20306223	20306935	20374918	20374100
GMJENb0046O09	Chr01	20314354	20314749	20421186	20420729
GMJENa0193B17	Chr01	20511447	20510832	20324730	20325371
GMJENb0051E22	Chr01	20455987	20455241	20332608	20333456
GMJENa0091M16	Chr01	20333302	20334071	20498537	20497817
GMJENa0161K17	Chr01	20541402	20540886	20352981	20353502
GMJENa0118K20	Chr01	20531290	20530668	20358812	20359418
GMJENb0111B19	Chr01	20492077	20491418	20366021	20366752
GMJENa0063E20	Chr01	20378584	20379159	20559872	20559264
GMJENb0014P24R1	Chr01	20421373	20421997	20512743	20512124
GMJENa0200L01	Chr01	20422753	20423146	20576453	20575879
GMJENb0059J12	Chr01	20552271	20551756	20449326	20449926
GMJENa0094I17	Chr01	20654058	20653360	20450661	20451217
GMJENa0186H24	Chr01	20451142	20451689	20596018	20595567
GMJENa0093E15	Chr01	20451170	20451829	20604868	20604383
GMJENa0146P05	Chr01	20626936	20626435	20451170	20451755
GMJENa0192M13	Chr01	20624688	20624199	20459942	20460475
GMJENb0061H24	Chr01	20566084	20565662	20465866	20466541
GMJENb0086E03	Chr01	20561286	20560686	20468565	20469259
GMJENa0005I24	Chr01	20473465	20474055	20683898	20683273
GMJENa0111P13	Chr01	20474229	20474902	20686990	20686383
GMJENa0069K16	Chr01	20653646	20653110	20476078	20476568
GMJENa0056P19	Chr01	20655390	20654748	20483354	20484025
GMJENa0144O04	Chr01	20645665	20645082	20489695	20490298
GMJENa0087A02	Chr01	20493434	20494155	20653846	20653113
GMJENa0112L18	Chr01	20493434	20494115	20670181	20669580
GMJENa0083E09	Chr01	20654055	20653474	20493459	20493981
GMJENb0081P16	Chr01	20501086	20501754	20646564	20645857
GMJENb0062E13	Chr01	20653746	20653416	20512939	20513496
GMJENa0097O21	Chr01	20653875	20653360	20518613	20519035
GMJENa0177O12	Chr01	20539758	20540140	20702847	20702229
GMJENa0108D03	Chr01	20546967	20547687	20727125	20726342
GMJENa0165B16	Chr01	20743930	20743401	20561851	20562502
GMJENa0116A08	Chr01	20783779	20783143	20596883	20597611
GMJENb0031I05	Chr01	20622663	20623078	20745680	20745347
GMJENa0163N01	Chr01	20629578	20630183	20804167	20803530
GMJENa0140F03	Chr01	20652005	20652677	20738379	20737644
GMJENa0164C16	Chr01	20812292	20811691	20652426	20652997
GMJENb0021C07	Chr01	20653080	20653613	20713012	20712447
GMJENa0127F07	Chr01	20830133	20829452	20653716	20654369
GMJENb0010G20	Chr01	20728815	20728433	20658580	20659022
GMJENa0103B14	Chr01	20821161	20820468	20672319	20672953
GMJENa0177L15	Chr01	20825485	20824897	20677313	20677973
GMJENa0082M15	Chr01	20683758	20684334	20877322	20876651
GMJENa0128M16	Chr01	20695004	20695663	20828973	20828422
GMJENa0133K21	Chr01	20702918	20703671	20879596	20878874
GMJENa0063I08	Chr01	20702958	20703292	20878847	20878276
GMJENa0077K08	Chr01	20711377	20711773	20872952	20872457
GMJENa0114J22	Chr01	20711383	20712039	20865305	20864664
GMJENa0064E03	Chr01	20714404	20714828	20888601	20888113
GMJENa0101P14	Chr01	20915093	20914437	20757615	20758167
GMJENa0159H21	Chr01	20947041	20946707	20783659	20784125
GMJENa0107A12	Chr01	20804210	20804912	20977885	20977472
GMJENa0117I05	Chr01	20806925	20807511	20974235	20973613
GMJENa0068N24	Chr01	20809198	20809558	20965864	20965360
GMJENa0187D04	Chr01	20945977	20945348	20809260	20809827
GMJENa0059F19	Chr01	20996606	20995995	20813640	20814321
GMJENa0116L04	Chr01	20974263	20973610	20816036	20816683
GMJENa0103F06	Chr01	20846458	20847113	21014595	21013919
GMJENa0167N18	Chr01	20848983	20849479	21031071	21030649
GMJENb0006M12	Chr01	20981472	20980741	20862549	20863241
GMJENa0109F14	Chr01	20864526	20865306	21040851	21040087
GMJENa0042C11	Chr01	20864709	20865269	20996532	20996206
GMJENa0111P11	Chr01	21007475	21006750	20864728	20865423
GMJENa0022D11	Chr01	21040588	21040085	20864729	20865406
GMJENb0072B10R1	Chr01	20874282	20874815	21015273	21014639
GMJENb0022D01	Chr01	20874563	20874909	20996805	20996071
GMJENb0041B08	Chr01	20917034	20917610	21047665	21047074
GMJENa0131L21	Chr01	20945147	20945740	21104676	21103957
GMJENa0172A16R1	Chr01	20947323	20947892	21089186	21088588
GMJENa0127H02	Chr01	20951486	20952148	21108427	21107789
GMJENa0095O17	Chr01	21096126	21095440	20958573	20959165
GMJENa0195I02	Chr01	21096575	21096157	20965928	20966264
GMJENa0126E12	Chr01	21000413	21001040	21145826	21145130
GMJENb0033J06	Chr01	21015337	21015967	21137590	21136942
GMJENa0015L13	Chr01	21184381	21183893	21016489	21017126
GMJENa0100E01	Chr01	21184983	21184633	21016494	21016970
GMJENa0088C21	Chr01	21104251	21103682	21016780	21017542
GMJENa0070G16	Chr01	21198550	21197873	21027604	21028179
GMJENb0091G03	Chr01	21140210	21139465	21029182	21029746
GMJENa0099A11	Chr01	21185744	21185151	21031154	21031795
GMJENa0002L01	Chr01	21037485	21037966	21210151	21209514
GMJENa0104A22	Chr01	21256182	21255504	21145543	21146187
GMJENa0103D19	Chr01	21149837	21150532	21256157	21255443
GMJENa0160A10	Chr01	21198561	21199097	21256148	21255672
GMJENb0039A19	Chr01	21200627	21201318	21262681	21261947
GMJENa0182P20	Chr01	21204013	21204411	21289782	21289262
GMJENa0054C24	Chr01	21332192	21331607	21217364	21218032
GMJENa0087E10	Chr01	21256194	21256807	21395189	21394525
GMJENa0192K15	Chr01	21413346	21412983	21256214	21256756
GMJENa0048P13	Chr01	21262364	21262923	21413375	21412789
GMJENa0132M10	Chr01	21395958	21395353	21262390	21263087
GMJENa0106D12	Chr01	21397223	21396527	21270802	21271449
GMJENa0177G03	Chr01	21278608	21279281	21383690	21383038
GMJENa0109C04	Chr01	21367326	21367850	21530225	21529481
GMJENa0100O15	Chr01	21378419	21379062	21562703	21562062
GMJENa0092G19	Chr01	21537558	21536946	21382035	21382444
GMJENa0126I21	Chr01	21384985	21385640	21562426	21561739
GMJENa0051K08	Chr01	21395385	21395974	21566712	21566095
GMJENa0185K10	Chr01	21419493	21419929	21560938	21560490
GMJENa0112I08	Chr01	21584089	21583423	21419512	21420146
GMJENa0069I20	Chr01	21483289	21482711	21421246	21421782
GMJENb0035A17	Chr01	21560624	21560129	21456980	21457319
GMJENb0061D08	Chr01	21458757	21459434	21578846	21578261
GMJENb0131M05	Chr01	21576056	21575289	21463398	21463944
GMJENa0119G06	Chr01	21612896	21612420	21483876	21484324
GMJENa0073L01	Chr01	21485386	21485769	21629008	21628543
GMJENa0081K23	Chr01	21489828	21490246	21643168	21642648
GMJENa0105E23	Chr01	21681779	21681253	21489840	21490368
GMJENa0052J18	Chr01	21639958	21639429	21493661	21494259
GMJENa0068E19	Chr01	21651729	21651265	21495430	21496046
GMJENa0127I22	Chr01	21681231	21680641	21522032	21522778
GMJENa0040H20	Chr01	21668112	21667533	21522046	21522505
GMJENa0061O23	Chr01	21710885	21710253	21561083	21561693
GMJENa0206K14	Chr01	21584357	21584900	21716338	21715796
GMJENa0155K13	Chr01	21769519	21768940	21617095	21617684
GMJENa0131A13	Chr01	21768056	21767303	21617104	21617856
GMJENb0015D16	Chr01	21652675	21653254	21768430	21767851
GMJENb0072G14R1	Chr01	21770398	21769982	21669102	21669635
GMJENa0097B16	Chr01	21698471	21699195	21879985	21879248
GMJENb0007E15	Chr01	21860248	21859638	21720447	21721066
GMJENa0113C18	Chr01	21883396	21882756	21728514	21729217
GMJENb0011L03	Chr01	21729539	21730166	21846343	21845727
GMJENb0043J16	Chr01	21748650	21749255	21860184	21859570
GMJENa0197J16	Chr01	21911389	21910959	21758325	21758750
GMJENa0188E09	Chr01	21768182	21768507	21915135	21914757
GMJENa0148K16	Chr01	21939878	21939292	21768225	21768584
GMJENa0122D06	Chr01	21952185	21951545	21770411	21771127
GMJENb0029J06	Chr01	21773687	21774265	21883893	21883376
GMJENa0004F19	Chr01	21774883	21775449	21968995	21968432
GMJENa0050M11	Chr01	21970245	21969612	21779249	21779803
GMJENa0116J18	Chr01	21779303	21780014	21945825	21945133
GMJENa0150N15	Chr01	21947704	21947298	21780337	21780793
GMJENa0195D23	Chr01	21802141	21802672	21947659	21947138
GMJENa0209P02	Chr01	21966917	21966285	21806460	21807086
GMJENa0123A22	Chr01	21822863	21823486	22002344	22001647
GMJENa0123C02	Chr01	21822863	21823541	22002219	22001651
GMJENb0060L07	Chr01	21958661	21958087	21832120	21832679
GMJENb0044F19	Chr01	21835658	21836201	21940019	21939457
GMJENa0160H21	Chr01	21861250	21861650	22020560	22020042
GMJENa0082L12	Chr01	21866813	21867323	22045722	22045123
GMJENa0176M12	Chr01	22041915	22041317	21866966	21867617
GMJENa0138A02	Chr01	22045103	22044680	21872771	21873373
GMJENa0180L17	Chr01	22047110	22046479	21880858	21881457
GMJENa0160H14	Chr01	22050209	22049629	21911435	21911838
GMJENb0039L14	Chr01	22038810	22038219	21919366	21919956
GMJENa0143A04	Chr01	21922785	21923385	22118366	22117753
GMJENb0021D22	Chr01	21925897	21926414	22034896	22034377
GMJENb0041O02	Chr01	21930395	21930920	22042463	22041967
GMJENa0103P08	Chr01	22121269	22120621	21947774	21948481
GMJENa0110D19	Chr01	21969036	21969761	22149548	22148860
GMJENa0072C06	Chr01	22149516	22148976	21970331	21970784
GMJENa0169G23	Chr01	21970799	21971361	22158798	22158250
GMJENa0015A05	Chr01	22171785	22171258	21979590	21980193
GMJENa0107J10	Chr01	21990582	21991142	22047079	22046464
GMJENa0133G06	Chr01	21990582	21991293	22175840	22175292
GMJENa0071H06	Chr01	21999556	22000111	22171544	22170895
GMJENa0172O24R1	Chr01	22194508	22193862	21999580	22000154
GMJENb0049A21R1	Chr01	22019560	22020180	22144309	22143646
GMJENb0017K24	Chr01	22023592	22024197	22124692	22124075
GMJENb0106K23	Chr01	22196178	22195517	22025094	22025700
GMJENa0008H02	Chr01	22245976	22245296	22042215	22042654
GMJENb0002B14	Chr01	22106884	22107512	22226537	22225856
GMJENa0136O06	Chr01	22141222	22141909	22318992	22318429
GMJENa0001O23	Chr01	22275961	22275377	22145346	22146025
GMJENa0001K23	Chr01	22275957	22275424	22145374	22145985
GMJENa0206N13	Chr01	22149832	22150318	22340242	22339573
GMJENa0051M15	Chr01	22327304	22326784	22150029	22150654
GMJENa0128K24	Chr01	22319012	22318414	22158867	22159428
GMJENa0131G15	Chr01	22159810	22160492	22323995	22323304
GMJENa0149M13	Chr01	22167342	22167946	22339952	22339599
GMJENa0159H04	Chr01	22171578	22172180	22320253	22319898
GMJENa0126F15	Chr01	22194519	22195197	22391911	22391150
GMJENa0122E20	Chr01	22371379	22370721	22199362	22200017
GMJENa0092M24	Chr01	22211065	22211753	22384556	22383940
GMJENa0196D10	Chr01	22394186	22393780	22237837	22238376
GMJENa0200F14	Chr01	22414258	22413577	22255287	22255935
GMJENa0119N08	Chr01	22461337	22460849	22267757	22268286
GMJENb0041K20	Chr01	22402815	22402160	22269421	22270097
GMJENa0059F18	Chr01	22272867	22273400	22446707	22446060
GMJENa0051H09	Chr01	22391564	22391033	22279609	22280200
GMJENa0066O21	Chr01	22462068	22461584	22282694	22283127
GMJENa0161E23	Chr01	22461393	22460874	22288752	22289284
GMJENa0087B14	Chr01	22458881	22458156	22288904	22289670
GMJENb0041P14	Chr01	22295683	22296351	22400476	22399866
GMJENa0041B05	Chr01	22491751	22491149	22299365	22299953
GMJENa0090O24	Chr01	22461337	22460663	22299817	22300449
GMJENb0030J19	Chr01	22310389	22310782	22433609	22433189
GMJENa0192M20	Chr01	22326692	22327116	22481082	22480700
GMJENa0052D13	Chr01	22491750	22491270	22327337	22327931
GMJENb0006K12	Chr01	22443613	22442977	22351485	22352145
GMJENb0036D03	Chr01	22353681	22354194	22467318	22466621
GMJENb0036J03	Chr01	22353691	22354289	22467314	22466737
GMJENa0089F23	Chr01	22363378	22364057	22507050	22506420
GMJENa0097A01	Chr01	22395953	22396635	22570887	22570395
GMJENa0023P14	Chr01	22416571	22417250	22589539	22588893
GMJENa0105B12	Chr01	22446744	22447503	22580551	22579927
GMJENb0061E10	Chr01	22460092	22460660	22547226	22546627
GMJENa0034L11	Chr01	22464476	22465100	22585080	22584493
GMJENb0005L09	Chr01	22500137	22500636	22624434	22623912
GMJENa0105N04	Chr01	22518433	22519132	22648472	22647957
GMJENa0210A16	Chr01	22635707	22635177	22519074	22519609
GMJENb0111G17	Chr01	22532106	22532796	22622365	22621728
GMJENb0131N24	Chr01	22532392	22533081	22628952	22628241
GMJENa0202F17	Chr01	22686449	22685894	22547206	22547902
GMJENa0196N24	Chr01	22550594	22551016	22648907	22648286
GMJENa0131H01	Chr01	22560709	22561415	22695489	22694784
GMJENa0147K13	Chr01	22589551	22590030	22717956	22717483
GMJENa0009J12	Chr01	22589841	22590261	22686163	22685807
GMJENa0078K05	Chr01	22726542	22726017	22598807	22599285
GMJENa0137I20	Chr01	22623420	22624067	22763729	22763035
GMJENa0095N21	Chr01	22635717	22636345	22766698	22766125
GMJENb0121B19	Chr01	22771279	22770563	22646219	22646872
GMJENa0199B19	Chr01	22647917	22648505	22812428	22811974
GMJENa0164K15	Chr01	22657731	22658239	22823655	22823244
GMJENb0086P04	Chr01	22673022	22673708	22784791	22784204
GMJENa0045F06	Chr01	22675572	22676154	22857188	22856633
GMJENa0044C08	Chr01	22686465	22686957	22860791	22860192
GMJENb0116C03	Chr01	22853249	22852630	22719525	22720005
GMJENa0055K09	Chr01	22893573	22892920	22730941	22731514
GMJENa0122N24	Chr01	22894512	22893904	22731122	22731794
GMJENb0049A15R1	Chr01	22833024	22832334	22732617	22733355
GMJENb0036B23	Chr01	22853260	22852523	22744116	22744796
GMJENa0064C10	Chr01	22922105	22921636	22766236	22766758
GMJENa0151J04	Chr01	22782308	22782751	22958466	22957997
GMJENa0093L24	Chr01	22922105	22921638	22786968	22787512
GMJENa0021F06	Chr01	22964045	22963494	22796293	22796936
GMJENa0051P21	Chr01	22964298	22963671	22803895	22804444
GMJENb0061K10	Chr01	22925406	22924769	22823174	22823716
GMJENa0186O06	Chr01	22823425	22824000	22964068	22963492
GMJENb0014G24R1	Chr01	22883025	22883659	22998686	22998164
GMJENa0176L13	Chr01	23014622	23014035	22886818	22887412
GMJENa0129O21	Chr01	23043982	23043457	22890180	22890786
GMJENb0081H15	Chr01	23038469	23037835	22925419	22926025
GMJENa0199E02	Chr01	22939175	22939862	23087979	23087591
GMJENa0150L11	Chr01	22951101	22951701	23119936	23119239
GMJENa0010B06	Chr01	23142358	23141971	22964342	22964914
GMJENa0128K21	Chr01	23141387	23140892	22977708	22978437
GMJENa0083H20	Chr01	22978490	22979133	23145933	23145208
GMJENb0012E09	Chr01	22990471	22991096	23102210	23101531
GMJENb0048F17	Chr01	22991361	22991757	23107857	23107358
GMJENa0065H14	Chr01	22992289	22992791	23158565	23158028
GMJENa0125L09	Chr01	22994886	22995532	23138012	23137373
GMJENa0179G05	Chr01	22996897	22997427	23132329	23131734
GMJENa0185J09	Chr01	23008207	23008689	23191636	23191107
GMJENa0039L01	Chr01	23165860	23165384	23009148	23009627
GMJENa0140H16	Chr01	23191797	23191081	23015902	23016652
GMJENa0115K10	Chr01	23025012	23025571	23191636	23191082
GMJENa0145O12	Chr01	23186148	23185547	23027598	23028209
GMJENb0003G14	Chr01	23028344	23028947	23154138	23153490
GMJENa0082F04	Chr01	23033733	23034318	23197743	23197175
GMJENa0069J11	Chr01	23201368	23200914	23033749	23034391
GMJENa0166O10	Chr01	23036654	23037242	23190477	23189938
GMJENa0142F09	Chr01	23205340	23204736	23039908	23040325
GMJENa0066O24	Chr01	23217966	23217394	23044243	23044881
GMJENa0126C08	Chr01	23044313	23044941	23228780	23228083
GMJENa0103E07	Chr01	23205340	23204713	23044338	23044941
GMJENb0071J15	Chr01	23167699	23167028	23053278	23053857
GMJENa0064B09	Chr01	23054702	23055290	23180684	23179992
GMJENa0037E08	Chr01	23234624	23234126	23055538	23056082
GMJENa0016B01	Chr01	23228784	23228312	23055700	23056193
GMJENa0165L11	Chr01	23217970	23217350	23055707	23056304
GMJENa0051P14	Chr01	23060492	23061146	23246819	23246199
GMJENb0011P08	Chr01	23061033	23061618	23182893	23182260
GMJENb0042A11	Chr01	23061796	23062231	23154126	23153597
GMJENb0012L24	Chr01	23231514	23230930	23072038	23072643
GMJENa0130B04	Chr01	23082110	23082883	23244281	23243558
GMJENa0163J23	Chr01	23088030	23088435	23252533	23251975
GMJENa0152N21	Chr01	23255271	23254589	23088052	23088491
GMJENa0113I03	Chr01	23158813	23158127	23096810	23097496
GMJENa0103K13	Chr01	23158813	23158106	23096821	23097473
GMJENb0056C10	Chr01	23097986	23098620	23208369	23207801
GMJENa0185A01	Chr01	23103034	23103415	23254975	23254603
GMJENa0122N22	Chr01	23119969	23120648	23290727	23290098
GMJENa0117O19	Chr01	23296958	23296303	23119991	23120689
GMJENa0131B16	Chr01	23342541	23341814	23138081	23138795
GMJENa0166L24	Chr01	23148103	23148659	23296357	23295762
GMJENa0157A19	Chr01	23325661	23324997	23148136	23148695
GMJENb0121L19	Chr01	23277685	23277068	23157352	23157936
GMJENb0004N20	Chr01	23157383	23157904	23282789	23282127
GMJENa0090O20	Chr01	23158821	23159374	23336304	23335712
GMJENa0201L23	Chr01	23362047	23361454	23171425	23171867
GMJENa0147F02	Chr01	23173139	23173633	23333499	23332912
GMJENa0182K07	Chr01	23344771	23344150	23180775	23181327
GMJENb0067I21	Chr01	23202279	23202706	23267410	23266953
GMJENa0122A07	Chr01	23289859	23290546	23446109	23445435
GMJENa0032P18	Chr01	23290094	23290417	23451297	23450633
GMJENa0065L17	Chr01	23519078	23518667	23325694	23326349
GMJENb0045H15	Chr01	23463346	23462814	23329840	23330274
GMJENa0159L04	Chr01	23344781	23345433	23446136	23445476
GMJENb0055D02	Chr01	23486230	23485549	23365866	23366553
GMJENa0128M05	Chr01	23377803	23378391	23571841	23571330
GMJENa0022K09	Chr01	23570549	23569987	23390086	23390703
GMJENb0014D01R1	Chr01	23400875	23401495	23504568	23503953
GMJENa0126L18	Chr01	23642843	23642180	23441119	23441758
GMJENa0020N02	Chr01	23446175	23446736	23648974	23648329
GMJENb0111N11	Chr01	23447368	23448165	23532829	23532239
GMJENa0067G01	Chr01	23635907	23635532	23448444	23448836
GMJENa0196M08	Chr01	23634007	23633678	23460042	23460619
GMJENa0060L18	Chr01	23665583	23664924	23487476	23488135
GMJENa0087C01	Chr01	23487626	23488278	23650907	23650391
GMJENa0131F05	Chr01	23668957	23668263	23487648	23488347
GMJENb0058B20	Chr01	23596536	23596100	23492114	23492679
GMJENa0009P04	Chr01	23635658	23635009	23501969	23502411
GMJENa0022D03	Chr01	23519336	23519846	23655235	23654624
GMJENb0037P12	Chr01	23677966	23677320	23573279	23573931
GMJENb0064P23	Chr01	23665073	23665728	23760961	23760254
GMJENa0035E16	Chr01	23759781	23759196	23676093	23676577
GMJENa0126H03	Chr01	23677450	23678136	23854734	23853998
GMJENa0038J07	Chr01	23848151	23847677	23680069	23680445
GMJENa0065N08	Chr01	23685705	23686245	23843754	23843172
GMJENa0118N03	Chr01	23853630	23853303	23704931	23705615
GMJENb0041I24	Chr01	23807414	23806689	23718247	23718951
GMJENa0157M17	Chr01	23767987	23768626	23928009	23927386
GMJENa0149F03	Chr01	23920157	23919566	23777418	23777937
GMJENb0017C12	Chr01	23778747	23779370	23880131	23879589
GMJENa0052H19	Chr01	23786567	23787037	23948166	23947603
GMJENa0194O14	Chr01	23937462	23936981	23787933	23788405
GMJENb0072A13R1	Chr01	23815688	23816234	23901419	23901020
GMJENa0135C11	Chr01	23836216	23836966	24001068	24000340
GMJENa0111E01	Chr01	24000144	23999605	23836472	23837203
GMJENa0168D21	Chr01	23875531	23876082	24062118	24061538
GMJENb0003P22	Chr01	23994037	23993559	23875825	23876416
GMJENb0067D17	Chr01	24035526	24035054	23915129	23915592
GMJENa0066J09	Chr01	24098026	24097502	23919535	23919995
GMJENb0053B09	Chr01	24038538	24037813	23920988	23921602
GMJENa0162N09	Chr01	24092057	24091553	23925163	23925823
GMJENa0135I10	Chr01	24103761	24103075	23928959	23929620
GMJENa0097M03	Chr01	23945588	23946069	24115308	24114564
GMJENb0055H14	Chr01	23956074	23956569	24035288	24034715
GMJENb0005M13	Chr01	23987025	23987615	24095955	24095381
GMJENa0138I01	Chr01	23989749	23990350	24146575	24146173
GMJENa0041I02	Chr01	24166775	24166212	23990662	23991233
GMJENb0081O21	Chr01	23992992	23993720	24122776	24122066
GMJENa0184E17	Chr01	23993424	23993784	24145602	24145031
GMJENa0121C19	Chr01	23999730	24000504	24166630	24165837
GMJENa0023D09	Chr01	24137170	24136739	23999747	24000402
GMJENa0169F17	Chr01	24162839	24162036	23999785	24000455
GMJENb0041O10	Chr01	24113269	24112618	24004570	24005142
GMJENb0011A21	Chr01	24006553	24007291	24105441	24104688
GMJENa0098N16	Chr01	24201253	24200901	24014028	24014495
GMJENa0064P01	Chr01	24016590	24017214	24194789	24194135
GMJENa0068L18	Chr01	24185410	24184828	24016876	24017253
GMJENb0019J20	Chr01	24040240	24040810	24102157	24101602
GMJENa0181J21	Chr01	24241924	24241383	24072701	24073159
GMJENb0059N08	Chr01	24076673	24077284	24200684	24200077
GMJENa0164A24	Chr01	24279281	24278686	24113038	24113628
GMJENb0064J09	Chr01	24123526	24124262	24218684	24218160
GMJENa0152E23	Chr01	24307268	24306603	24128568	24129153
GMJENa0036P15	Chr01	24142207	24142824	24253112	24252477
GMJENa0084E20	Chr01	24146687	24147370	24334236	24333627
GMJENa0090O12	Chr01	24146687	24147304	24333743	24333104
GMJENa0144J12	Chr01	24367876	24367275	24209804	24210369
GMJENa0155J12	Chr01	24410282	24409848	24221657	24222340
GMJENa0200I09	Chr01	24388282	24387700	24231983	24232450
GMJENa0006G19	Chr01	24235764	24236259	24415235	24414551
GMJENa0161P06	Chr01	24237652	24238170	24409315	24408734
GMJENa0038L11	Chr01	24407630	24407118	24237676	24238153
GMJENa0163K23	Chr01	24239989	24240545	24409067	24408511
GMJENa0051B02	Chr01	24439394	24438767	24241957	24242558
GMJENa0194O13	Chr01	24254424	24254915	24335382	24334825
GMJENa0161O22	Chr01	24274154	24274615	24439287	24438734
GMJENa0059G01	Chr01	24464525	24464168	24278837	24279256
GMJENa0002E09	Chr01	24298138	24298660	24487676	24487065
GMJENa0164N09	Chr01	24495909	24495311	24309145	24309710
GMJENa0100N23	Chr01	24315812	24316347	24498406	24497750
GMJENa0159D13	Chr01	24489259	24488767	24330470	24331161
GMJENa0198D08	Chr01	24498431	24497818	24333908	24334564
GMJENa0107B08	Chr01	24502283	24501658	24336802	24337483
GMJENa0007N14	Chr01	24502027	24501655	24354461	24355101
GMJENa0164P09	Chr01	24526492	24525950	24354462	24354967
GMJENa0119F03	Chr01	24385226	24385892	24540634	24539872
GMJENb0006H24	Chr01	24492434	24491835	24394350	24395087
GMJENa0092J05	Chr01	24592666	24591988	24409376	24409950
GMJENa0113E18	Chr01	24409626	24410306	24571572	24570810
GMJENa0114F19	Chr01	24409896	24410540	24595262	24594867
GMJENa0209C10	Chr01	24409896	24410425	24555802	24555108
GMJENa0112I09	Chr01	24574883	24574345	24410371	24411044
GMJENa0206K02	Chr01	24592666	24592091	24410693	24411120
GMJENa0049G22	Chr01	24413868	24414210	24581882	24581475
GMJENa0057K23	Chr01	24415333	24415858	24571576	24571048
GMJENa0003H13	Chr01	24600491	24599873	24450942	24451525
GMJENa0064L18	Chr01	24456392	24456902	24651201	24650664
GMJENb0101N23	Chr01	24569939	24569187	24462338	24463052
GMJENa0061P09	Chr01	24477166	24477738	24643396	24642825
GMJENb0039M09	Chr01	24482723	24483379	24560951	24560255
GMJENb0031L17	Chr01	24567456	24567053	24488264	24489064
GMJENa0127N14	Chr01	24498441	24499160	24646046	24645360
GMJENa0175J22	Chr01	24502293	24502881	24643403	24642891
GMJENa0205C07	Chr01	24682664	24682167	24512942	24513515
GMJENa0034P23	Chr01	24671111	24670493	24512948	24513570
GMJENa0022O08	Chr01	24690589	24690215	24524902	24525513
GMJENa0037N09	Chr01	24529378	24530012	24724909	24724372
GMJENa0134I11	Chr01	24533002	24533592	24706336	24705781
GMJENa0036F20	Chr01	24540665	24541317	24684406	24683807
GMJENa0078O18	Chr01	24541158	24541744	24718324	24717721
GMJENa0099K18	Chr01	24719018	24718410	24544402	24545023
GMJENb0060H14	Chr01	24545544	24546233	24643460	24642934
GMJENa0069F03	Chr01	24555856	24556219	24733561	24733024
GMJENa0075N24	Chr01	24733610	24733021	24560545	24561171
GMJENa0075I23	Chr01	24677417	24676863	24561197	24561681
GMJENa0096I23	Chr01	24567488	24568098	24741030	24740490
GMJENa0150A06	Chr01	24740760	24740135	24571641	24572067
GMJENa0060I10	Chr01	24651277	24650665	24574648	24575304
GMJENa0141D24	Chr01	24764960	24764235	24588195	24588936
GMJENa0190H09	Chr01	24618535	24619154	24764121	24763587
GMJENa0122G18	Chr01	24626933	24627571	24793815	24793160
GMJENb0012D24	Chr01	24637448	24638147	24744685	24743952
GMJENb0067P13	Chr01	24738236	24737698	24645274	24645783
GMJENa0091I13	Chr01	24682735	24683429	24868081	24867470
GMJENa0127D18	Chr01	24682735	24683308	24857055	24856399
GMJENa0069L14	Chr01	24704534	24705019	24857059	24856480
GMJENa0185A12	Chr01	24793228	24792694	24706393	24706918
GMJENa0142I01	Chr01	24707819	24708447	24879229	24878721
GMJENb0011P22	Chr01	24824583	24823786	24710081	24710835
GMJENb0056O10	Chr01	24837841	24837274	24716477	24717074
GMJENa0089B02	Chr01	24718363	24719051	24893385	24892809
GMJENa0132O24	Chr01	24724273	24724879	24901819	24901261
GMJENb0056A09	Chr01	24744790	24745346	24833756	24833035
GMJENa0005I23	Chr01	24769334	24769912	24936546	24935948
GMJENa0088A07	Chr01	24769334	24770091	24925986	24925241
GMJENa0090I21	Chr01	24784068	24784616	24950428	24949758
GMJENb0043D12	Chr01	24789361	24789991	24902703	24902128
GMJENa0096I08	Chr01	24794340	24794993	24959109	24958442
GMJENa0051K07	Chr01	24794487	24795019	24967820	24967223
GMJENa0061E22	Chr01	24794487	24794989	24974626	24974073
GMJENa0092P23	Chr01	24966294	24965692	24807078	24807718
GMJENb0042H05	Chr01	24819325	24819939	24946585	24946004
GMJENa0079A23	Chr01	24833981	24834603	24995178	24994609
GMJENa0074L03	Chr01	25010101	25009550	24846290	24846712
GMJENa0009A22	Chr01	24857360	24857738	25060784	25060388
GMJENa0012H12	Chr01	24862361	24862976	25032214	25031894
GMJENb0013F20	Chr01	24877897	24878522	25000217	24999576
GMJENa0124I20	Chr01	24909611	24910227	24963819	24963169
GMJENa0101B03	Chr01	24916282	24917003	25079880	25079144
GMJENa0044O03	Chr01	25085822	25085183	24926060	24926643
GMJENa0073A14	Chr01	25100932	25100294	24926530	24927087
GMJENb0022G24	Chr01	25033316	25032906	24927951	24928516
GMJENb0057L05	Chr01	24928032	24928654	25057065	25056425
GMJENa0194F05	Chr01	24936579	24937034	25061014	25060523
GMJENa0123I21	Chr01	24936607	24937256	25096173	25095451
GMJENa0198J09	Chr01	24936607	24937095	25085741	25085219
GMJENa0144J21	Chr01	25108675	25108097	24940286	24940857
GMJENa0051H21	Chr01	24974671	24975202	25146879	25146306
GMJENa0094C10	Chr01	25146910	25146279	24990358	24990929
GMJENa0059J07	Chr01	24994735	24995351	25061216	25060587
GMJENb0014K03R1	Chr01	25001559	25002093	25126472	25125916
GMJENa0064L19	Chr01	25198270	25197686	25003613	25004161
GMJENb0065L02	Chr01	25008374	25008956	25135083	25134675
GMJENa0123K21	Chr01	25014691	25015084	25136069	25135366
GMJENb0046F20	Chr01	25113638	25113047	25022474	25023087
GMJENa0067M10	Chr01	25035301	25035832	25162837	25162263
GMJENb0067E19	Chr01	25074812	25075216	25205084	25204644
GMJENa0059J02	Chr01	25207382	25206864	25081235	25081666
GMJENa0117E11	Chr01	25095790	25096507	25158491	25157813
GMJENa0080A16	Chr01	25105362	25105910	25263952	25263604
GMJENa0047J19	Chr01	25372689	25372222	25158569	25158973
GMJENa0022D14	Chr01	25158669	25159197	25335508	25334866
GMJENb0013H18	Chr01	25240865	25240353	25179402	25179989
GMJENa0151A20	Chr01	25187086	25187672	25364865	25364286
GMJENa0075C23	Chr01	25196206	25196827	25357161	25356755
GMJENa0055P13	Chr01	25198476	25199182	25387154	25386479
GMJENa0135D07	Chr01	25336562	25335805	25202642	25203405
GMJENa0208B11	Chr01	25204552	25205186	25364594	25364151
GMJENa0134G17	Chr01	25207391	25208035	25364864	25364112
GMJENb0131J06	Chr01	25207819	25208288	25317218	25316797
GMJENb0062G13	Chr01	25240246	25240582	25376959	25376422
GMJENa0166I15	Chr01	25457849	25457266	25261714	25262241
GMJENb0016D18	Chr01	25282455	25283165	25371705	25371161
GMJENa0157E21	Chr01	25286422	25286908	25459534	25459102
GMJENa0006P14	Chr01	25291857	25292298	25492207	25491646
GMJENa0151F03	Chr01	25457849	25457337	25291862	25292335
GMJENa0083O17	Chr01	25311117	25311459	25499844	25499285
GMJENa0113F16	Chr01	25325708	25326352	25502002	25501345
GMJENb0033M20	Chr01	25326469	25327146	25408054	25407457
GMJENa0085I21	Chr01	25336574	25337160	25492264	25491571
GMJENa0119I21	Chr01	25523615	25522936	25338622	25339425
GMJENa0064K06	Chr01	25343238	25343743	25459491	25459031
GMJENa0108A09	Chr01	25343238	25343904	25506521	25505819
GMJENa0049E07	Chr01	25510031	25509643	25343642	25344076
GMJENb0036C02	Chr01	25442619	25441973	25350646	25351291
GMJENa0051M09	Chr01	25513251	25512733	25356037	25356585
GMJENb0012C04	Chr01	25482291	25481639	25359522	25360066
GMJENa0024H15	Chr01	25556698	25556159	25361084	25361571
GMJENa0161F15	Chr01	25538924	25538457	25363786	25364317
GMJENb0011G08	Chr01	25399360	25399956	25520795	25520291
GMJENa0067K13	Chr01	25590167	25589797	25410983	25411482
GMJENa0146P13	Chr01	25580987	25580628	25431042	25431401
GMJENb0013F06	Chr01	25437136	25437658	25566008	25565421
GMJENa0091H07	Chr01	25457860	25458448	25624826	25624295
GMJENb0007C18	Chr01	25562937	25562457	25460313	25460905
GMJENa0109O20	Chr01	25470507	25471150	25644446	25643891
GMJENa0077M12	Chr01	25676488	25676038	25506579	25507079
GMJENa0105K19	Chr01	25509333	25509928	25668420	25667852
GMJENa0085M09	Chr01	25596589	25595854	25513295	25514041
GMJENb0131F21	Chr01	25646014	25645344	25522346	25523166
GMJENa0139K17	Chr01	25523264	25523898	25710530	25709896
GMJENa0143J11	Chr01	25523685	25524297	25664634	25664116
GMJENa0049L10	Chr01	25523796	25524126	25663192	25662648
GMJENb0003H20	Chr01	25526152	25526854	25654121	25653361
GMJENa0067B10	Chr01	25682914	25682268	25536250	25536900
GMJENa0124E08	Chr01	25549816	25550509	25728083	25727433
GMJENb0025E19	Chr01	25556100	25556615	25693145	25692586
GMJENa0149A07	Chr01	25711922	25711347	25559394	25559782
GMJENb0106E08	Chr01	25588482	25589136	25693105	25692567
GMJENa0063M03	Chr01	25596597	25597132	25759681	25759225
GMJENb0001A15	Chr01	25599739	25600501	25715902	25715223
GMJENa0096K01	Chr01	25753252	25752689	25624868	25625382
GMJENb0028H24	Chr01	25901830	25901244	25771896	25772430
GMJENa0079C05	Chr01	25775774	25776400	25969696	25969182
GMJENa0084I21	Chr01	25939947	25939329	25776886	25777500
GMJENa0083E12	Chr01	25958105	25957577	25783222	25783858
GMJENb0021N15	Chr01	25890945	25890412	25796454	25796959
GMJENa0084I10	Chr01	25815327	25816001	25963192	25962479
GMJENa0005L23	Chr01	25939947	25939330	25815583	25816233
GMJENa0042B19	Chr01	25988084	25987601	25817170	25817655
GMJENa0083C04	Chr01	25927615	25927074	25857708	25858314
GMJENa0157K02	Chr01	26098240	26097910	25923965	25924405
GMJENa0046H01	Chr01	26102366	26101904	25932378	25932754
GMJENb0015L02	Chr01	25939057	25939473	26057965	26057527
GMJENa0180G15	Chr01	26068123	26067432	25959611	25960250
GMJENa0160H11	Chr01	26015326	26014693	25959623	25960266
GMJENa0051P12	Chr01	25960486	25961094	26097944	26097285
GMJENa0131L19	Chr01	26118515	26118143	25963244	25963934
GMJENa0036P09	Chr01	25988261	25988868	26174265	26173721
GMJENa0163F24	Chr01	26170815	26170325	26009046	26009582
GMJENa0027J08	Chr01	26194128	26193528	26009050	26009513
GMJENa0117H22	Chr01	26019582	26020238	26202460	26201836
GMJENa0071O02	Chr01	26021207	26021818	26177440	26176854
GMJENa0107G11	Chr01	26232682	26232072	26043832	26044456
GMJENa0035N05	Chr01	26252106	26251646	26068160	26068637
GMJENa0035J07	Chr01	26252106	26251558	26068167	26068647
GMJENa0145E13	Chr01	26239993	26239428	26071192	26071844
GMJENa0078M04	Chr01	26071315	26071834	26222982	26222440
GMJENa0061D11	Chr01	26267443	26267053	26089181	26089674
GMJENa0114K08	Chr01	26294297	26293790	26122557	26123144
GMJENa0162C01	Chr01	26122790	26123136	26302718	26302118
GMJENa0080M17	Chr01	26286429	26285963	26131867	26132483
GMJENb0091E16	Chr01	26169717	26170326	26292172	26291462
GMJENb0022G09	Chr01	26169937	26170338	26291675	26290970
GMJENa0148L09	Chr01	26187083	26187438	26398004	26397600
GMJENb0055C08	Chr01	26194414	26195124	26305903	26305295
GMJENa0131L24	Chr01	26232692	26233361	26403088	26402487
GMJENa0127A18	Chr01	26235062	26235715	26395917	26395221
GMJENa0196O03	Chr01	26235319	26235703	26395650	26395219
GMJENb0121C10	Chr01	26266472	26267240	26369472	26368844
GMJENb0042C13	Chr01	26271399	26271992	26372768	26372286
GMJENa0135B12	Chr01	26435323	26434585	26277979	26278766
GMJENa0126N07	Chr01	26291823	26292501	26435985	26435384
GMJENa0034F08	Chr01	26461509	26460920	26292851	26293317
GMJENb0037K03	Chr01	26562496	26561950	26462331	26462892
GMJENa0162G17	Chr01	26484818	26485174	26662043	26661668
GMJENa0103O24	Chr01	26696850	26696238	26504500	26505181
GMJENa0145P17	Chr01	26681015	26680456	26506816	26507439
GMJENa0092C09	Chr01	26507940	26508617	26669606	26668912
GMJENa0019I09	Chr01	26509314	26509809	26684089	26683673
GMJENa0165A10	Chr01	26702362	26701868	26527279	26527893
GMJENb0066K16	Chr01	26660901	26660441	26546505	26547140
GMJENa0169M08	Chr01	26549549	26550258	26721286	26720555
GMJENb0013J02	Chr01	26660742	26660083	26561926	26562563
GMJENb0046P04	Chr01	26658186	26657623	26562323	26562962
GMJENa0109N10	Chr01	26742574	26741868	26569256	26569840
GMJENa0142H02	Chr01	26578346	26578986	26751351	26750753
GMJENa0132D19	Chr01	26739084	26738388	26581405	26582144
GMJENa0075L16	Chr01	26721307	26720768	26582107	26582757
GMJENa0087F20	Chr01	26608258	26608887	26776937	26776320
GMJENb0013A09	Chr01	26738763	26738130	26618987	26619671
GMJENa0071N17	Chr01	26819060	26818705	26625890	26626297
GMJENa0026O06	Chr01	26831085	26830509	26629534	26630099
GMJENa0166I11	Chr01	26630805	26631363	26817852	26817506
GMJENa0149C01	Chr01	26834287	26833603	26647521	26648163
GMJENa0080N24	Chr01	26845859	26845203	26664644	26665227
GMJENb0076A21	Chr01	26801273	26800490	26668009	26668777
GMJENa0010O09	Chr01	26688814	26689177	26865840	26865203
GMJENa0075O24	Chr01	26689163	26689799	26871626	26871046
GMJENa0106O24	Chr01	26702441	26703123	26876684	26875963
GMJENb0032K11	Chr01	26798079	26797723	26706127	26706456
GMJENa0051O09	Chr01	26891547	26891131	26714491	26714951
GMJENb0059K17	Chr01	26724735	26725404	26807862	26807179
GMJENa0119D18	Chr01	26891547	26890782	26730950	26731726
GMJENa0119N16	Chr01	26891547	26890907	26730950	26731593
GMJENa0017A12	Chr01	26921361	26920978	26742683	26743286
GMJENb0001A08	Chr01	26866705	26865959	26743637	26744391
GMJENa0072O20	Chr01	26743674	26744171	26927918	26927302
GMJENa0061P12	Chr01	26749434	26749946	26932854	26932266
GMJENa0003C08	Chr01	26760169	26760633	26933114	26932695
GMJENa0069G22	Chr01	26905221	26904676	26762695	26763174
GMJENb0081H13	Chr01	26908881	26908321	26785480	26786061
GMJENa0175P13	Chr01	26793900	26794601	26937586	26936943
GMJENa0118L08	Chr01	26798694	26799312	26986543	26985920
GMJENb0056F05	Chr01	26931232	26930647	26800819	26801306
GMJENb0013E07	Chr01	26811073	26811708	26880466	26879861
GMJENb0046O05	Chr01	26931230	26930642	26822634	26823168
GMJENb0062P18	Chr01	26933497	26934135	27064387	27063797
GMJENa0104J05	Chr01	26972188	26972813	27041200	27040637
GMJENa0072B17	Chr01	27180515	27179917	26977272	26977933
GMJENa0125M10	Chr01	26991048	26991730	27180492	27179774
GMJENb0035H05	Chr01	27007285	27007660	27123908	27123350
GMJENb0076N21	Chr01	27022103	27022789	27156746	27156066
GMJENb0031J06	Chr01	27125217	27124435	27025854	27026457
GMJENb0060K08	Chr01	27033198	27033802	27114465	27114043
GMJENa0172A04R1	Chr01	27035957	27036555	27190131	27189462
GMJENa0085B17	Chr01	27048324	27049000	27243062	27242397
GMJENa0172M03R1	Chr01	27244237	27243667	27060201	27060796
GMJENa0131A18	Chr01	27066966	27067669	27251182	27250486
GMJENa0147L20	Chr01	27266690	27266267	27093548	27093911
GMJENa0095H06	Chr01	27317318	27316647	27115969	27116565
GMJENa0129L11	Chr01	27301924	27301192	27126779	27127494
GMJENb0059K13	Chr01	27250042	27249394	27155387	27155914
GMJENb0011G17	Chr01	27161803	27162482	27302783	27302103
GMJENa0199C21	Chr01	27355372	27354950	27196372	27196947
GMJENa0201C21	Chr01	27214343	27214762	27378884	27378432
GMJENa0168K07	Chr01	27216154	27216574	27395421	27394987
GMJENa0021E12	Chr01	27393424	27392745	27216218	27216745
GMJENa0096J12	Chr01	27411735	27411112	27217484	27218052
GMJENa0059A01	Chr01	27217708	27218385	27385364	27384691
GMJENa0107D07	Chr01	27393422	27392694	27218822	27219498
GMJENa0175B19	Chr01	27395247	27394540	27219678	27220424
GMJENa0156A23	Chr01	27401140	27400457	27224076	27224781
GMJENa0032H16	Chr01	27413870	27413299	27239695	27240271
GMJENa0113O24	Chr01	27411735	27411056	27239695	27240420
GMJENa0062L23	Chr01	27440817	27440387	27241723	27242155
GMJENa0207D16	Chr01	27243105	27243719	27416038	27415482
GMJENa0164D03	Chr01	27440817	27440142	27243128	27243722
GMJENa0113N16	Chr01	27247743	27248377	27446727	27446053
GMJENa0088B21	Chr01	27411596	27410989	27247779	27248338
GMJENa0102K03	Chr01	27436528	27435937	27247803	27248249
GMJENa0133L22	Chr01	27247965	27248411	27411714	27410940
GMJENa0105D19	Chr01	27393422	27392684	27247987	27248595
GMJENa0186B21	Chr01	27249091	27249551	27416038	27415611
GMJENa0109E08	Chr01	27251228	27251946	27436566	27435847
GMJENa0020P07	Chr01	27261747	27262417	27446714	27446032
GMJENa0115H15	Chr01	27440817	27440107	27261748	27262448
GMJENa0193N14	Chr01	27426992	27426444	27268903	27269245
GMJENb0013N20	Chr01	27271098	27271616	27396633	27396158
GMJENb0056E22	Chr01	27277889	27278524	27416314	27415616
GMJENa0125P16	Chr01	27467230	27466555	27278303	27278834
GMJENa0105I14	Chr01	27386737	27386296	27278304	27278723
GMJENa0162E04	Chr01	27297966	27298313	27467214	27466563
GMJENa0146J23	Chr01	27467230	27466653	27301952	27302479
GMJENa0141D13	Chr01	27489089	27488473	27324838	27325536
GMJENb0022K08	Chr01	27333385	27333856	27410764	27410071
GMJENa0066O14	Chr01	27503145	27502689	27340509	27341124
GMJENb0010I05	Chr01	27357329	27357875	27503917	27503459
GMJENa0067D11	Chr01	27564471	27564006	27379578	27380109
GMJENa0121K05	Chr01	27386745	27387268	27564818	27564433
GMJENb0121G13	Chr01	27388241	27388901	27478590	27477927
GMJENa0128F04	Chr01	27564471	27563909	27393451	27394030
GMJENa0118A21	Chr01	27564654	27563997	27397636	27398345
GMJENa0051B04	Chr01	27413884	27414482	27638637	27638010
GMJENa0045J22	Chr01	27552207	27551819	27414673	27415141
GMJENb0058K22	Chr01	27417614	27418273	27470560	27470020
GMJENa0067A16	Chr01	27666372	27665711	27446774	27447392
GMJENa0076O02	Chr01	27674709	27674040	27471582	27472166
GMJENa0069D15	Chr01	27718701	27718274	27496332	27496918
GMJENa0124D13	Chr01	27502029	27502697	27689078	27688336
GMJENa0026B18	Chr01	27503175	27503797	27554104	27553466
GMJENa0032H04	Chr01	27507167	27507698	27707823	27707176
GMJENb0058G19	Chr01	27552021	27552599	27685367	27684771
GMJENa0035E11	Chr01	27563543	27564149	27761010	27760452
GMJENa0147F21	Chr01	27761034	27760562	27570589	27571074
GMJENb0001E12	Chr01	27660020	27660742	27746242	27745527
GMJENa0121K19	Chr01	27676705	27677276	27831458	27830861
GMJENa0079O03	Chr01	27678025	27678650	27821816	27821133
GMJENa0091D10	Chr01	27860761	27860054	27681844	27682435
GMJENb0027N19	Chr01	27683987	27684357	27789896	27789274
GMJENa0136N14	Chr01	27886062	27885438	27689838	27690497
GMJENa0118C01	Chr01	27716278	27716936	27880749	27880277
GMJENb0106E21	Chr01	27725975	27726726	27844093	27843470
GMJENb0052H15	Chr01	27746268	27746894	27852974	27852464
GMJENb0071P19	Chr01	27843957	27843624	27746596	27747252
GMJENa0159L17	Chr01	27751860	27752235	27922391	27921725
GMJENb0076I18	Chr01	27921791	27921044	27780716	27781494
GMJENb0045A18	Chr01	27932375	27931893	27818797	27819298
GMJENa0060J21	Chr01	27995285	27994852	27818800	27819311
[truncated: 50,799 more rows]

## Sheet: TableS6
Supplementary Table S6. Sequencing and assembly of cDNA libraries derived from young leaves
Library name	EW1_ATCACG_L001..EW1_ATCACG_L007
No. of libraries	7
Insert size	300 bp
No. of entries	71134481
No. of contigs	754548
No. of ORFs	395330
No. of longest ORFs	172753
*Sequence data deposited in DNA Bank of Japan (DDBJ) as BioProject ID PRJDB3582

## Sheet: TableS7
Supplementary Table S7. SNPs and INDELs in G. max cv. Enrei based on Gmax275 genome assembly
Chr / Scaffold	Total	SNPs	INDELs	Gmax275 length (bp)	Ave. distance between SNPs (bp/SNP)
Chr01	100579	83446	17133	56831624	681.059
Chr02	74948	59609	15339	48577505	814.936
Chr03	141828	119939	21889	45779781	381.692
Chr04	145472	124527	20945	52389146	420.705
Chr05	55513	42883	12630	42234498	984.877
Chr06	120485	100191	20294	51416486	513.185
Chr07	80162	65291	14871	44630646	683.565
Chr08	70402	55030	15372	47837940	869.307
Chr09	83562	66788	16774	50189764	751.479
Chr10	86648	70730	15918	51566898	729.067
Chr11	48787	38151	10636	34766867	911.296
Chr12	68258	55465	12793	40091314	722.822
Chr13	112150	90966	21184	45874162	504.3
Chr14	68399	55182	13217	49042192	888.735
Chr15	130143	111062	19081	51756343	466.013
Chr16	91740	75716	16024	37887014	500.383
Chr17	88611	73878	14733	41641366	563.65
Chr18	209015	180878	28137	58018742	320.762
Chr19	138041	118469	19572	50746916	428.356
Chr20	70129	55818	14311	47904181	858.221
Scaffolds	18587	15022	3565	29311887	1951.26
Total	2003459	1659041	344418	978495272	589.796

## Sheet: TableS8
Supplementary Table S8. Seed proteome data and corresponding models in Gmax275 and Enrei
Family	Member	Gmax189 gene model	Score	Mass	No. of matches	mol%	Description	Classification	Gmax275 gene model	Enrei gene model	Ortholog group
4	1	Glyma20g28550.1	1931	26156	40	7.87	AT3G22490.1|Seed maturation protein	Storage	Glyma.20G147600	Gmech0020G03098	my_prefix5715
6	1	Glyma10g03310.1	950	27496	30	6.06	AT3G22490.1|Seed maturation protein	Storage	Glyma.10G027600	Gmech0010G00247	my_prefix5715
1	2	Glyma03g32030.1	3920	56299	229	4.31	AT5G44120.3|RmlC-like cupins superfamily protein	Storage	Glyma.03G163500	Gmech0003G02931	my_prefix1539
4	2	Glyma10g39270.1	1316	26280	26	3.29	AT3G22490.1|Seed maturation protein	Storage	Glyma.10G247500	Gmech0010G03809	my_prefix38470
2	1	Glyma13g18450.1	4500	55793	134	3.06	AT1G03890.1|RmlC-like cupins superfamily protein	Storage	Glyma.13G123500	Gmech0013G01961	my_prefix1539
3	2	Glyma20g28640.1	2798	50468	185	2.38	AT3G22640.1|cupin family protein	Storage	Glyma.20G148200	Gmech0020G03089	my_prefix8093
3	4	Glyma20g28460.1	2373	50502	162	2.38	AT3G22640.1|cupin family protein	Storage	Glyma.20G146200		my_prefix8093
3	1	Glyma10g39150.1	3435	72469	180	2.2	AT3G22640.1|cupin family protein	Storage	Glyma.10G246300	Gmech0010G03798	my_prefix7644
1	1	Glyma04g32950.1	5050	44606	157	1.99	AT5G44120.3|RmlC-like cupins superfamily protein	Storage	Glyma.04G165500	Gmech0004G03229	my_prefix2432
3	3	Glyma20g28650.1	2621	70549	167	1.93	AT3G22640.1|cupin family protein	Storage	Glyma.20G148400	Gmech0020G03104	my_prefix7644
5	1	Glyma10g03390.1	1904	58353	84	1.92	AT3G22640.1|cupin family protein	Storage	Glyma.10G028300	Gmech0010G00251	my_prefix10537
1	3	Glyma19g34780.1	1406	54835	64	1.88	AT5G44120.3|RmlC-like cupins superfamily protein	Storage	Glyma.19G164900	Gmech0019G03127	my_prefix1539
11	1	Glyma13g36400.1	592	20652	27	1.88		Miscellaneous	Glyma.13G288100
18	1	Glyma01g10900.1	290	22718	19	1.63	AT1G73260.1|kunitz trypsin inhibitor 1	Protease/inhibitor	Glyma.01G095000	Gmech0001G02291	my_prefix35353
19	1	Glyma08g45531.1	283	24346	11	1.49	AT1G73260.1|kunitz trypsin inhibitor 1	Protease/inhibitor	Glyma.08G341500	Gmech0008G04169	my_prefix37794
5	2	Glyma02g16440.1	767	58123	58	1.36	AT3G22640.1|cupin family protein	Storage	Glyma.02G145700	Gmech0002G01378	my_prefix10537
20	1	Glyma17g17860.1	282	10055	4	1.32	AT2G23110.1|Late embryogenesis abundant protein, group 6	LEA proteins	Glyma.17G164200		my_prefix17607
9	1	Glyma10g07410.1	633	48766	19	1.13	AT2G36640.1|embryonic cell protein 63	Miscellaneous	Glyma.10G064400	Gmech0010G00567	my_prefix15332
47	1	Glyma14g06900.1	110	17729	5	1.13	AT1G53540.1|HSP20-like chaperones superfamily protein	Sorting/folding	Glyma.14G063700	Gmech0014G00538	my_prefix39592
41	1	Glyma02g08400.1	125	17907	11	1.11	AT1G53540.1|HSP20-like chaperones superfamily protein	Sorting/folding	Glyma.02G076600	Gmech0002G00668	my_prefix35603
22	2	Glyma06g18110.1	246	36855	12	1.1	AT1G13440.1|glyceraldehyde-3-phosphate dehydrogenase C2	Glycolysis	Glyma.06G172600		my_prefix12337
22	3	Glyma04g36860.1	208	36861	13	1.1	AT1G13440.1|glyceraldehyde-3-phosphate dehydrogenase C2	Glycolysis	Glyma.04G193400		my_prefix12337
10	1	Glyma09g31740.1	622	26671	9	0.97		Miscellaneous	Glyma.09G185500	Gmech0009G03260	my_prefix38062
22	1	Glyma18g01330.1	259	37087	12	0.86	AT3G04120.1|glyceraldehyde-3-phosphate dehydrogenase C subunit 1	Glycolysis	Glyma.18G009700	Gmech0018G00077	my_prefix5472
34	1	Glyma10g05580.1	172	44721	12	0.86	AT3G09630.1|Ribosomal protein L4/L1 family	Miscellaneous	Glyma.10G048600	Gmech0010G00429	my_prefix2435
65	1	Glyma10g43770.1	70	14310	4	0.86	AT2G39390.1|Ribosomal L29 family protein	Miscellaneous	Glyma.10G291500		my_prefix3135
13	1	Glyma11g15870.1	391	53054	20	0.85	AT2G28490.1|RmlC-like cupins superfamily protein	Storage	Glyma.U020300	Gmesc0021G00124	my_prefix22886
7	1	Glyma03g39940.1	929	47105	43	0.81	AT1G03220.1|Eukaryotic aspartyl protease family protein	Protease/inhibitor	Glyma.03G239700	Gmech0003G03603	my_prefix14531
8	1	Glyma13g42320.1	764	78929	28	0.81	AT1G55020.1|lipoxygenase 1	Lipid	Glyma.13G347600	Gmech0013G03921	my_prefix1052
56	2	Glyma20g38440.1	83	23514	6	0.79	AT1G75270.1|dehydroascorbate reductase 2	Miscellaneous	Glyma.20G240300	Gmech0020G03905	my_prefix13352
16	1	Glyma10g29630.1	344	32150	12	0.78	AT1G54870.1|NAD(P)-binding Rossmann-fold superfamily protein	Miscellaneous	Glyma.10G155300		my_prefix9938
16	2	Glyma20g37670.1	242	32054	9	0.78	AT1G54870.1|NAD(P)-binding Rossmann-fold superfamily protein	Miscellaneous	Glyma.20G233000	Gmech0020G03848	my_prefix9938
17	1	Glyma13g09530.1	306	41925	25	0.74	AT1G77120.1|alcohol dehydrogenase 1	Miscellaneous	Glyma.13G035200	Gmech0013G00889	my_prefix16561
26	1	Glyma15g41550.1	216	42409	11	0.74	AT1G79550.1|phosphoglycerate kinase	Glycolysis	Glyma.15G262100	Gmech0015G03843	my_prefix2297
21	1	Glyma13g23790.1	267	43082	15	0.72	AT5G14780.1|formate dehydrogenase	Miscellaneous	Glyma.13G168700	Gmech0013G02394	my_prefix3865
81	1	Glyma16g03470.1	52	16735	6	0.72	AT1G01470.1|Late embryogenesis abundant protein	LEA proteins	Glyma.16G031300	Gmech0016G00258	my_prefix40109
32	1	Glyma07g10030.1	192	25644	5	0.71		Miscellaneous	Glyma.07G090400	Gmech0007G00775	my_prefix37174
31	1	Glyma04g01181.1	192	17310	5	0.7	AT2G21490.1|dehydrin LEA	LEA proteins	Glyma.04G009900	Gmech0004G00087	my_prefix22292
47	2	Glyma02g42000.1	97	17283	3	0.7	AT1G53540.1|HSP20-like chaperones superfamily protein	Sorting/folding	Glyma.02G252800	Gmech0002G03773	my_prefix35820
30	1	Glyma09g32540.1	205	17498	5	0.68	AT1G65980.1|thioredoxin-dependent peroxidase 1	Miscellaneous	Glyma.09G192800	Gmech0009G03327	my_prefix38068
34	2	Glyma13g19930.1	167	44691	11	0.68	AT3G09630.1|Ribosomal protein L4/L1 family	Miscellaneous	Glyma.13G136400	Gmech0013G02088	my_prefix2435
46	1	Glyma13g29550.1	111	27847	5	0.65	AT5G45690.1|Protein of unknown function (DUF1264)	Miscellaneous	Glyma.13G223700	Gmech0013G02882	my_prefix8566
35	1	Glyma12g34160.1	169	18393	17	0.64		Miscellaneous	Glyma.12G213600	Gmech0012G03096	my_prefix14951
69	1	Glyma11g29350.1	66	28317	6	0.64	AT1G07080.1|Thioredoxin superfamily protein	Miscellaneous	Glyma.11G165600	Gmech0011G01786	my_prefix8685
64	1	Glyma03g29801.1	71	9612	2	0.58	AT3G45030.1|Ribosomal protein S10p/S20e family protein	Miscellaneous
2	2	Glyma10g04280.1	2039	64215	49	0.56	AT5G44120.3|RmlC-like cupins superfamily protein	Storage	Glyma.10G037100		my_prefix1539
8	2	Glyma15g03030.1	556	97107	30	0.56	AT1G55020.1|lipoxygenase 1	Lipid	Glyma.15G026300	Gmech0015G00243	my_prefix1052
33	1	Glyma07g38790.1	188	32097	13	0.56	AT1G54870.1|NAD(P)-binding Rossmann-fold superfamily protein	Miscellaneous	Glyma.07G258200	Gmech0007G03708	my_prefix18063
89	1	Glyma16g05090.1	45	9978	2	0.56	AT3G61110.1|ribosomal protein S27	Miscellaneous	Glyma.16G046500
50	1	Glyma10g33350.1	105	21319	6	0.54	AT5G55240.1|ARABIDOPSIS THALIANA PEROXYGENASE 2	Lipid	Glyma.10G189900	Gmech0010G03312	my_prefix38408
39	2	Glyma04g42690.1	107	58963	12	0.5	AT1G77510.1|PDI-like 1-2	Sorting/folding	Glyma.04G247900	Gmech0004G04095	my_prefix2339
68	1	Glyma02g26840.1	66	22852	6	0.5	AT2G37270.1|ribosomal protein 5B	Miscellaneous	Glyma.02G167900	Gmech0002G02243	my_prefix3751
7	2	Glyma19g42490.1	408	47859	31	0.49	AT1G03220.1|Eukaryotic aspartyl protease family protein	Protease/inhibitor	Glyma.19G236600	Gmech0019G03768	my_prefix14531
36	1	Glyma02g00810.1	169	35787	5	0.49	AT5G43330.1|Lactate/malate dehydrogenase family protein	Miscellaneous	Glyma.02G005500	Gmech0002G00058	my_prefix6847
56	1	Glyma10g43730.1	89	23491	4	0.49	AT1G75270.1|dehydroascorbate reductase 2	Miscellaneous	Glyma.10G291100		my_prefix13352
126	1	Glyma0169s00200.1	18	11439	1	0.49	AT3G44590.1|60S acidic ribosomal protein family	Miscellaneous	Glyma.11G209200	Gmech0011G02896	my_prefix38763
9	2	Glyma13g21291.1	289	50613	10	0.46	AT2G36640.1|embryonic cell protein 63	Miscellaneous	Glyma.13G149000	Gmech0013G02207	my_prefix39275
27	1	Glyma08g09310.1	213	24542	7	0.46	AT1G48130.1|1-cysteine peroxiredoxin 1	Miscellaneous	Glyma.08G088000	Gmech0008G00739	my_prefix12121
82	1	Glyma06g01310.1	50	11987	2	0.46	AT4G39200.1|Ribosomal protein S25 family protein	Miscellaneous	Glyma.06G011000		my_prefix3211
94	1	Glyma01g31610.1	42	12051	1	0.46	AT5G01650.1|Tautomerase/MIF superfamily protein	Miscellaneous	Glyma.01G126000	Gmech0001G03341	my_prefix16915
15	1	Glyma05g36600.1	353	77821	13	0.44	AT5G42020.1|Heat shock protein 70 (Hsp 70) family protein	Sorting/folding	Glyma.05G219600	Gmech0005G03191	my_prefix1062
74	1	Glyma02g00490.1	61	12578	3	0.44	AT1G36240.1|Ribosomal protein L7Ae/L30e/S12e/Gadd45 family protein	Miscellaneous	Glyma.02G002300		my_prefix4722
54	1	Glyma05g26290.1	98	12844	2	0.43	AT1G74270.1|Ribosomal protein L35Ae family protein	Miscellaneous	Glyma.05G132500	Gmech0005G02434	my_prefix18568
63	1	Glyma08g09200.1	71	12875	3	0.43	AT1G74270.1|Ribosomal protein L35Ae family protein	Miscellaneous	Glyma.08G087000		my_prefix25651
138	1	Glyma11g11290.1	15	12695	1	0.43	AT2G21060.1|glycine-rich protein 2B	Miscellaneous
8	3	Glyma13g42310.1	390	97499	15	0.42	AT1G55020.1|lipoxygenase 1	Lipid	Glyma.13G347500	Gmech0013G03920	my_prefix1052
117	1	Glyma04g17670.1	22	13281	2	0.42	AT1G29040.1|	Miscellaneous	Glyma.04G136400	Gmech0004G01771	my_prefix36348
39	1	Glyma06g12090.1	144	56365	11	0.4	AT1G77510.1|PDI-like 1-2	Sorting/folding	Glyma.06G114800	Gmech0006G00970	my_prefix2339
93	1	Glyma13g25870.1	42	27708	5	0.4	AT3G12490.2|cystatin B	Protease/inhibitor	Glyma.13G189500	Gmech0013G02563	my_prefix6215
28	1	Glyma02g01590.1	210	30909	18	0.36	AT5G10530.1|Concanavalin A-like lectin protein kinase family protein	Miscellaneous	Glyma.02G012600	Gmech0002G00118	my_prefix35523
51	1	Glyma02g09370.1	102	30441	4	0.36	AT3G57490.1|Ribosomal protein S5 family protein	Miscellaneous	Glyma.02G085300	Gmech0002G00749
57	1	Glyma03g32380.1	88	15174	2	0.36	AT1G04480.1|Ribosomal protein L14p/L23e family protein	Miscellaneous	Glyma.03G166700		my_prefix3147
[truncated: 92 more rows]
